# Supplementary material for: Transcriptome analysis and molecular mechanism of linseed (Linum usitatissimum L.) drought tolerance under repeated drought using single-molecule long-read sequencing
Source: BMC Genomics. 2021 Feb 9;22:109. doi: 10.1186/s12864-021-07416-5 (PMC7871411; doi:10.1186/s12864-021-07416-5)
Supplement: Supplementary file 14 — Additional file 14: Table S12 The GO analysis result of DEGs both up- or down-regulated in Z141 and NY-17 under DS or RD stress. [file 12864_2021_7416_MOESM14_ESM.xlsx]

## Sheet: Z141_vs_NY17_RD_up_common_GO_en
ID	GO_Type	Description	GeneRatio	BgRatio	pvalue	p.adjust	qvalue	geneID	Count
GO:0006560	BP	proline metabolic process	14/2242	25/32470	1.16124e-10	2.36325e-07	2.16726e-07	Lus10004697.g/Lus10040264.g/Lus10001018.g/Lus10001016.g/Lus10004696.g/Lus10040263.g/Lus10001019.g/Lus10037544.g/Lus10040262.g/Lus10034095.g/Lus10030158.g/Lus10034094.g/Lus10019103.g/Lus10016354.g	14
GO:0006561	BP	proline biosynthetic process	12/2242	18/32470	1.43227e-10	2.36325e-07	2.16726e-07	Lus10004697.g/Lus10040264.g/Lus10001018.g/Lus10001016.g/Lus10004696.g/Lus10040263.g/Lus10001019.g/Lus10037544.g/Lus10040262.g/Lus10030158.g/Lus10019103.g/Lus10016354.g	12
GO:0004350	MF	glutamate-5-semialdehyde dehydrogenase activity	9/2242	10/32470	3.29703e-10	3.62673e-07	3.32595e-07	Lus10004697.g/Lus10040264.g/Lus10001018.g/Lus10001016.g/Lus10004696.g/Lus10040263.g/Lus10001019.g/Lus10040262.g/Lus10030158.g	9
GO:0055085	BP	transmembrane transport	171/2242	1544/32470	4.71188e-10	3.8873e-07	3.56491e-07	scaffold51.48/Lus10027211.g/Lus10035730.g/Lus10027367.g/Lus10040652.g/Lus10008352.g/Lus10005239.g/Lus10033814.g/Lus10003903.g/Lus10004819.g/Lus10029701.g/Lus10038148.g/Lus10032950.g/scaffold134.17/Lus10018027.g/Lus10030683.g/Lus10023240.g/Lus10016487.g/Lus10029668.g/Lus10025800.g/scaffold156.172/Lus10029966.g/Lus10035507.g/Lus10010618.g/Lus10026946.g/Lus10020318.g/Lus10014640.g/Lus10018992.g/Lus1…	171
GO:0004349	MF	glutamate 5-kinase activity	9/2242	11/32470	1.70117e-09	1.12277e-06	1.02966e-06	Lus10004697.g/Lus10040264.g/Lus10001018.g/Lus10001016.g/Lus10004696.g/Lus10040263.g/Lus10001019.g/Lus10040262.g/Lus10030158.g	9
GO:0022857	MF	transmembrane transporter activity	171/2242	1635/32470	2.94147e-08	1.61781e-05	1.48363e-05	Lus10000310.g/Lus10015754.g/Lus10000673.g/scaffold51.48/Lus10027211.g/Lus10035730.g/Lus10027725.g/Lus10027367.g/Lus10040652.g/Lus10011335.g/Lus10014932.g/Lus10008352.g/Lus10005239.g/Lus10024614.g/Lus10033814.g/Lus10003903.g/Lus10004819.g/Lus10015994.g/Lus10038148.g/scaffold134.17/Lus10018027.g/Lus10030683.g/Lus10032252.g/Lus10028810.g/Lus10016487.g/Lus10003738.g/Lus10029668.g/Lus10025800.g/scaffo…	171
GO:0001101	BP	response to acid chemical	60/2242	413/32470	3.93283e-08	1.85405e-05	1.70028e-05	Lus10042731.g/Lus10011824.g/Lus10013155.g/Lus10003660.g/Lus10027969.g/scaffold732.45/Lus10007283.g/Lus10021190.g/Lus10043186.g/Lus10005652.g/Lus10021369.g/Lus10024614.g/Lus10020719.g/scaffold1202.11/Lus10032252.g/Lus10014280.g/Lus10005619.g/Lus10010140.g/Lus10000659.g/Lus10021240.g/Lus10028001.g/Lus10017049.g/Lus10002900.g/Lus10036667.g/Lus10021098.g/Lus10021940.g/Lus10037032.g/Lus10014657.g/Lus1…	60
GO:0016620	MF	oxidoreductase activity, acting on the aldehyde or oxo group of donors, NAD or NADP as acceptor	21/2242	82/32470	1.16103e-07	4.78926e-05	4.39206e-05	Lus10004697.g/Lus10013155.g/Lus10008117.g/Lus10043245.g/Lus10040264.g/Lus10001018.g/Lus10019387.g/Lus10001016.g/C8303341.1/Lus10004696.g/Lus10040263.g/Lus10001019.g/Lus10004264.g/Lus10040262.g/Lus10030158.g/Lus10029336.g/Lus10042174.g/Lus10042724.g/Lus10029684.g/Lus10032150.g/Lus10009602.g	21
GO:0019202	MF	amino acid kinase activity	9/2242	17/32470	5.13025e-07	0.000188109	0.000172509	Lus10004697.g/Lus10040264.g/Lus10001018.g/Lus10001016.g/Lus10004696.g/Lus10040263.g/Lus10001019.g/Lus10040262.g/Lus10030158.g	9
GO:0001071	MF	DNA-binding transcription factor activity	111/2242	1024/32470	1.59346e-06	0.000478038	0.000438392	Lus10005997.g/Lus10030214.g/Lus10011326.g/Lus10005146.g/Lus10042731.g/Lus10019850.g/Lus10014066.g/Lus10017550.g/Lus10010733.g/Lus10017283.g/scaffold1253.43/Lus10038874.g/Lus10006489.g/Lus10021259.g/Lus10021369.g/Lus10014994.g/Lus10009755.g/Lus10012202.g/Lus10017829.g/Lus10027897.g/Lus10002399.g/Lus10003034.g/Lus10034907.g/Lus10005106.g/Lus10018009.g/Lus10041618.g/Lus10036542.g/Lus10006369.g/Lus10…	111
GO:0003700	MF	DNA-binding transcription factor activity	111/2242	1024/32470	1.59346e-06	0.000478038	0.000438392	Lus10005997.g/Lus10030214.g/Lus10011326.g/Lus10005146.g/Lus10042731.g/Lus10019850.g/Lus10014066.g/Lus10017550.g/Lus10010733.g/Lus10017283.g/scaffold1253.43/Lus10038874.g/Lus10006489.g/Lus10021259.g/Lus10021369.g/Lus10014994.g/Lus10009755.g/Lus10012202.g/Lus10017829.g/Lus10027897.g/Lus10002399.g/Lus10003034.g/Lus10034907.g/Lus10005106.g/Lus10018009.g/Lus10041618.g/Lus10036542.g/Lus10006369.g/Lus10…	111
GO:0016903	MF	oxidoreductase activity, acting on the aldehyde or oxo group of donors	24/2242	120/32470	2.04455e-06	0.000562252	0.000515622	Lus10004697.g/Lus10013155.g/Lus10008117.g/Lus10043245.g/Lus10028648.g/Lus10040264.g/Lus10001018.g/Lus10019387.g/Lus10001016.g/C8303341.1/Lus10004696.g/Lus10040263.g/Lus10001019.g/Lus10004264.g/Lus10040262.g/Lus10030158.g/Lus10034306.g/Lus10029336.g/Lus10042174.g/Lus10042724.g/Lus10029684.g/Lus10032150.g/Lus10018945.g/Lus10009602.g	24
GO:0016774	MF	phosphotransferase activity, carboxyl group as acceptor	9/2242	21/32470	4.81173e-06	0.00122144	0.00112014	Lus10004697.g/Lus10040264.g/Lus10001018.g/Lus10001016.g/Lus10004696.g/Lus10040263.g/Lus10001019.g/Lus10040262.g/Lus10030158.g	9
GO:1901700	BP	response to oxygen-containing compound	66/2242	543/32470	5.82901e-06	0.00137398	0.00126003	Lus10042731.g/Lus10011824.g/Lus10013155.g/Lus10003660.g/Lus10027969.g/scaffold732.45/Lus10007283.g/Lus10021190.g/Lus10043186.g/Lus10005652.g/Lus10021369.g/Lus10024614.g/Lus10020719.g/scaffold1202.11/Lus10032252.g/Lus10014280.g/Lus10005619.g/Lus10010140.g/Lus10000659.g/Lus10021240.g/Lus10028001.g/Lus10017049.g/Lus10002900.g/Lus10036667.g/Lus10021098.g/Lus10021940.g/Lus10037032.g/Lus10014657.g/Lus1…	66
GO:0008483	MF	transaminase activity	18/2242	81/32470	8.15403e-06	0.00168177	0.00154229	Lus10017934.g/Lus10022137.g/Lus10039861.g/scaffold338.16/Lus10033661.g/Lus10007247.g/Lus10013676.g/Lus10035342.g/Lus10017705.g/Lus10029984.g/Lus10003810.g/Lus10017704.g/scaffold34.66/Lus10011101.g/Lus10023299.g/Lus10038510.g/Lus10005333.g/Lus10009086.g	18
GO:0016769	MF	transferase activity, transferring nitrogenous groups	18/2242	81/32470	8.15403e-06	0.00168177	0.00154229	Lus10017934.g/Lus10022137.g/Lus10039861.g/scaffold338.16/Lus10033661.g/Lus10007247.g/Lus10013676.g/Lus10035342.g/Lus10017705.g/Lus10029984.g/Lus10003810.g/Lus10017704.g/scaffold34.66/Lus10011101.g/Lus10023299.g/Lus10038510.g/Lus10005333.g/Lus10009086.g	18
GO:0016645	MF	oxidoreductase activity, acting on the CH-NH group of donors	16/2242	68/32470	1.18716e-05	0.00230449	0.00211337	Lus10003845.g/Lus10026471.g/C8310011.1/Lus10038086.g/Lus10024289.g/Lus10026933.g/Lus10004264.g/Lus10009808.g/Lus10020132.g/scaffold380.27/Lus10034095.g/Lus10034094.g/Lus10042174.g/Lus10019103.g/Lus10018038.g/Lus10042168.g	16
GO:0009269	BP	response to desiccation	7/2242	14/32470	1.65019e-05	0.00259383	0.00237872	Lus10013155.g/Lus10005652.g/Lus10010140.g/Lus10036402.g/Lus10007905.g/Lus10021827.g/Lus10001876.g	7
GO:0009737	BP	response to abscisic acid	37/2242	256/32470	1.65601e-05	0.00259383	0.00237872	Lus10042731.g/Lus10011824.g/Lus10013155.g/Lus10007283.g/Lus10021190.g/Lus10043186.g/Lus10005652.g/Lus10021369.g/Lus10020719.g/scaffold1202.11/Lus10005619.g/Lus10000659.g/Lus10028001.g/Lus10017049.g/Lus10002900.g/Lus10036667.g/Lus10021098.g/Lus10037032.g/Lus10014657.g/Lus10009040.g/Lus10022060.g/Lus10017977.g/Lus10042575.g/Lus10032557.g/Lus10002028.g/Lus10017251.g/Lus10009678.g/Lus10009819.g/Lus10…	37
GO:0030001	BP	metal ion transport	50/2242	389/32470	1.73469e-05	0.00259383	0.00237872	Lus10035730.g/Lus10004819.g/Lus10039419.g/Lus10030514.g/Lus10007911.g/scaffold156.172/Lus10035507.g/Lus10001913.g/Lus10032154.g/Lus10033386.g/Lus10040965.g/Lus10000039.g/Lus10018324.g/Lus10042040.g/Lus10042946.g/Lus10002865.g/Lus10008803.g/Lus10018594.g/Lus10009789.g/Lus10040674.g/Lus10034840.g/Lus10019442.g/Lus10027321.g/Lus10017730.g/Lus10039131.g/Lus10004413.g/Lus10002490.g/Lus10005934.g/Lus10…	50
GO:0004838	MF	L-tyrosine:2-oxoglutarate aminotransferase activity	6/2242	10/32470	1.77392e-05	0.00259383	0.00237872	Lus10017934.g/Lus10039861.g/Lus10033661.g/Lus10013676.g/Lus10017705.g/Lus10017704.g	6
GO:0070547	MF	L-tyrosine aminotransferase activity	6/2242	10/32470	1.77392e-05	0.00259383	0.00237872	Lus10017934.g/Lus10039861.g/Lus10033661.g/Lus10013676.g/Lus10017705.g/Lus10017704.g	6
GO:0097305	BP	response to alcohol	37/2242	257/32470	1.80782e-05	0.00259383	0.00237872	Lus10042731.g/Lus10011824.g/Lus10013155.g/Lus10007283.g/Lus10021190.g/Lus10043186.g/Lus10005652.g/Lus10021369.g/Lus10020719.g/scaffold1202.11/Lus10005619.g/Lus10000659.g/Lus10028001.g/Lus10017049.g/Lus10002900.g/Lus10036667.g/Lus10021098.g/Lus10037032.g/Lus10014657.g/Lus10009040.g/Lus10022060.g/Lus10017977.g/Lus10042575.g/Lus10032557.g/Lus10002028.g/Lus10017251.g/Lus10009678.g/Lus10009819.g/Lus10…	37
GO:0016602	CC	CCAAT-binding factor complex	5/2242	7/32470	2.9165e-05	0.00401019	0.00367761	Lus10011326.g/Lus10012202.g/Lus10038448.g/Lus10023358.g/Lus10030137.g	5
GO:0022891	MF	transmembrane transporter activity	126/2242	1280/32470	3.62864e-05	0.0047898	0.00439256	Lus10000310.g/Lus10015754.g/Lus10000673.g/scaffold51.48/Lus10035730.g/Lus10027725.g/Lus10040652.g/Lus10011335.g/Lus10014932.g/Lus10008352.g/Lus10005239.g/Lus10024614.g/Lus10033814.g/Lus10003903.g/Lus10004819.g/Lus10038148.g/Lus10030683.g/Lus10032252.g/Lus10016487.g/Lus10003738.g/Lus10025800.g/scaffold156.172/Lus10029966.g/Lus10035507.g/Lus10010618.g/Lus10026946.g/Lus10018992.g/Lus10007691.g/Lus10…	126
GO:0046873	MF	metal ion transmembrane transporter activity	39/2242	286/32470	3.8092e-05	0.00483475	0.00443378	Lus10035730.g/Lus10004819.g/Lus10016487.g/scaffold156.172/Lus10035507.g/Lus10005221.g/Lus10032154.g/Lus10033386.g/Lus10018324.g/Lus10042040.g/Lus10008803.g/Lus10018594.g/Lus10009789.g/Lus10040674.g/Lus10034840.g/Lus10019442.g/Lus10039131.g/Lus10004413.g/Lus10040744.g/Lus10031320.g/Lus10002490.g/Lus10005934.g/Lus10009819.g/Lus10004605.g/Lus10009598.g/Lus10040925.g/Lus10031891.g/Lus10035765.g/Lus10…	39
GO:0042578	MF	phosphoric ester hydrolase activity	73/2242	658/32470	4.45327e-05	0.00544289	0.00499149	Lus10001832.g/Lus10034965.g/Lus10012962.g/Lus10009210.g/Lus10040738.g/Lus10019017.g/Lus10003399.g/Lus10006485.g/Lus10004703.g/Lus10016493.g/Lus10034483.g/Lus10019625.g/Lus10040270.g/Lus10037080.g/Lus10002500.g/Lus10033706.g/Lus10032820.g/Lus10021940.g/Lus10005559.g/Lus10031634.g/Lus10029873.g/Lus10024179.g/Lus10004596.g/Lus10037019.g/Lus10001862.g/Lus10035175.g/Lus10012556.g/Lus10005405.g/Lus1003…	73
GO:0009084	BP	glutamine family amino acid biosynthetic process	14/2242	61/32470	5.52974e-05	0.0065172	0.0059767	Lus10004697.g/Lus10014407.g/Lus10040264.g/Lus10001018.g/Lus10001016.g/Lus10004696.g/Lus10040263.g/Lus10001019.g/Lus10037544.g/Lus10040262.g/Lus10030158.g/Lus10012536.g/Lus10019103.g/Lus10016354.g	14
GO:0006816	BP	calcium ion transport	11/2242	40/32470	5.89923e-05	0.00671291	0.00615618	Lus10004819.g/Lus10035507.g/Lus10033386.g/Lus10042040.g/Lus10018594.g/Lus10040674.g/Lus10034840.g/Lus10002490.g/Lus10003611.g/Lus10018687.g/Lus10018044.g	11
GO:0009395	BP	phospholipid catabolic process	5/2242	8/32470	7.3323e-05	0.00806553	0.00739662	Lus10035175.g/Lus10012556.g/Lus10020672.g/Lus10002582.g/Lus10011337.g	5
GO:0043565	MF	sequence-specific DNA binding	83/2242	786/32470	7.89949e-05	0.00840913	0.00771173	Lus10005997.g/Lus10030214.g/Lus10005146.g/Lus10005134.g/Lus10019850.g/Lus10014066.g/Lus10017283.g/Lus10038874.g/scaffold370.2/Lus10006489.g/Lus10021369.g/Lus10014994.g/Lus10009755.g/Lus10027897.g/Lus10002399.g/Lus10003034.g/Lus10034907.g/Lus10018009.g/Lus10005783.g/Lus10006369.g/Lus10008840.g/Lus10008007.g/Lus10017049.g/Lus10002900.g/Lus10011346.g/Lus10022225.g/Lus10032952.g/Lus10019348.g/Lus1003…	83
GO:0006811	BP	ion transport	109/2242	1103/32470	0.000102727	0.0105937	0.00971511	Lus10000673.g/scaffold51.48/Lus10027211.g/Lus10035730.g/Lus10040652.g/Lus10008352.g/Lus10005239.g/Lus10024614.g/Lus10003903.g/Lus10004819.g/Lus10039419.g/Lus10038148.g/Lus10030514.g/Lus10030683.g/Lus10032252.g/Lus10016487.g/Lus10003738.g/Lus10007911.g/scaffold156.172/Lus10035507.g/Lus10010618.g/Lus10001913.g/Lus10026946.g/Lus10005221.g/Lus10038923.g/Lus10032154.g/Lus10033386.g/Lus10040965.g/Lus10…	109
GO:0022804	MF	active transmembrane transporter activity	84/2242	805/32470	0.000107431	0.0107431	0.00985214	Lus10027725.g/Lus10027367.g/Lus10033814.g/Lus10004819.g/Lus10015994.g/scaffold134.17/Lus10018027.g/Lus10028810.g/Lus10029668.g/Lus10025800.g/Lus10029966.g/Lus10035507.g/Lus10026946.g/Lus10012959.g/Lus10005685.g/Lus10016799.g/Lus10007231.g/Lus10035354.g/Lus10033386.g/Lus10006171.g/Lus10012741.g/Lus10024965.g/Lus10013626.g/Lus10026303.g/Lus10011288.g/Lus10033886.g/Lus10001334.g/Lus10003560.g/Lus100…	84
GO:0006950	BP	response to stress	172/2242	1899/32470	0.000142371	0.0129733	0.0118974	Lus10000310.g/Lus10015754.g/Lus10018873.g/Lus10042731.g/Lus10005134.g/Lus10013155.g/Lus10003660.g/scaffold732.45/scaffold370.2/Lus10043186.g/Lus10011335.g/Lus10005652.g/Lus10014545.g/Lus10033749.g/Lus10029759.g/Lus10014740.g/Lus10024614.g/Lus10034337.g/Lus10035832.g/Lus10004289.g/Lus10007633.g/Lus10032252.g/Lus10014280.g/Lus10002733.g/Lus10003398.g/Lus10003265.g/Lus10041436.g/scaffold701.92/Lus10…	172
GO:0033993	BP	response to lipid	41/2242	325/32470	0.000142895	0.0129733	0.0118974	Lus10042731.g/Lus10011824.g/Lus10013155.g/Lus10027969.g/Lus10007283.g/Lus10021190.g/Lus10043186.g/Lus10005652.g/Lus10021369.g/Lus10020719.g/scaffold1202.11/Lus10005619.g/Lus10000659.g/Lus10028001.g/Lus10017049.g/Lus10002900.g/Lus10036667.g/Lus10021098.g/Lus10037032.g/Lus10014657.g/Lus10009040.g/Lus10022060.g/Lus10017977.g/Lus10042575.g/Lus10032557.g/Lus10002028.g/Lus10017251.g/Lus10009678.g/Lus10…	41
GO:0050801	BP	ion homeostasis	32/2242	232/32470	0.000145979	0.0129733	0.0118974	Lus10035730.g/Lus10039419.g/Lus10030514.g/Lus10016487.g/Lus10003738.g/Lus10026946.g/Lus10007231.g/Lus10040965.g/Lus10042946.g/Lus10002865.g/Lus10035175.g/Lus10012556.g/Lus10026944.g/Lus10010623.g/Lus10017730.g/Lus10039131.g/Lus10040744.g/Lus10005934.g/Lus10004465.g/Lus10033179.g/Lus10009598.g/Lus10015268.g/Lus10010619.g/Lus10018989.g/Lus10002582.g/Lus10042445.g/Lus10003259.g/Lus10002674.g/scaffol…	32
GO:0010150	BP	leaf senescence	10/2242	37/32470	0.000149389	0.0129733	0.0118974	Lus10000310.g/Lus10015754.g/Lus10030446.g/Lus10011335.g/Lus10026617.g/Lus10037032.g/Lus10024927.g/Lus10027404.g/Lus10043200.g/Lus10037156.g	10
GO:0090693	BP	plant organ senescence	10/2242	37/32470	0.000149389	0.0129733	0.0118974	Lus10000310.g/Lus10015754.g/Lus10030446.g/Lus10011335.g/Lus10026617.g/Lus10037032.g/Lus10024927.g/Lus10027404.g/Lus10043200.g/Lus10037156.g	10
GO:0022892	MF	transmembrane transporter activity	134/2242	1429/32470	0.000184442	0.0149503	0.0137104	Lus10000310.g/Lus10015754.g/Lus10000673.g/scaffold51.48/Lus10035730.g/Lus10027725.g/Lus10040652.g/Lus10011335.g/Lus10014932.g/Lus10008352.g/Lus10005239.g/Lus10024614.g/Lus10033814.g/Lus10003903.g/Lus10004819.g/Lus10038148.g/Lus10030683.g/Lus10032252.g/Lus10016487.g/Lus10003738.g/Lus10025800.g/scaffold156.172/Lus10029966.g/Lus10035507.g/Lus10010618.g/Lus10026946.g/Lus10018992.g/Lus10007691.g/Lus10…	134
GO:0098771	BP	inorganic ion homeostasis	31/2242	225/32470	0.000187444	0.0149503	0.0137104	Lus10035730.g/Lus10039419.g/Lus10030514.g/Lus10016487.g/Lus10026946.g/Lus10007231.g/Lus10040965.g/Lus10042946.g/Lus10002865.g/Lus10035175.g/Lus10012556.g/Lus10026944.g/Lus10010623.g/Lus10017730.g/Lus10039131.g/Lus10040744.g/Lus10005934.g/Lus10004465.g/Lus10033179.g/Lus10009598.g/Lus10015268.g/Lus10010619.g/Lus10018989.g/Lus10002582.g/Lus10042445.g/Lus10003259.g/Lus10002674.g/scaffold43.7/Lus10033…	31
GO:0070546	MF	L-phenylalanine aminotransferase activity	8/2242	25/32470	0.000190276	0.0149503	0.0137104	Lus10017934.g/Lus10022137.g/Lus10039861.g/Lus10033661.g/Lus10013676.g/Lus10017705.g/Lus10017704.g/Lus10011101.g	8
GO:0080130	MF	L-phenylalanine:2-oxoglutarate aminotransferase activity	8/2242	25/32470	0.000190276	0.0149503	0.0137104	Lus10017934.g/Lus10022137.g/Lus10039861.g/Lus10033661.g/Lus10013676.g/Lus10017705.g/Lus10017704.g/Lus10011101.g	8
GO:0009415	BP	response to water	17/2242	94/32470	0.000221714	0.0170152	0.0156041	Lus10013155.g/Lus10005652.g/Lus10024614.g/Lus10032252.g/Lus10014280.g/Lus10010140.g/Lus10000659.g/Lus10021240.g/Lus10028001.g/Lus10017977.g/Lus10011777.g/Lus10016273.g/Lus10036402.g/Lus10007905.g/Lus10016354.g/Lus10021827.g/Lus10001876.g	17
GO:0006812	BP	cation transport	69/2242	649/32470	0.000250261	0.0187696	0.0172129	Lus10035730.g/Lus10004819.g/Lus10039419.g/Lus10030514.g/Lus10016487.g/Lus10007911.g/scaffold156.172/Lus10035507.g/Lus10010618.g/Lus10001913.g/Lus10026946.g/Lus10032154.g/Lus10033386.g/Lus10040965.g/Lus10000039.g/Lus10018324.g/Lus10042040.g/Lus10042946.g/Lus10002865.g/Lus10008803.g/Lus10018594.g/Lus10037544.g/Lus10009789.g/Lus10018692.g/Lus10040674.g/Lus10034840.g/Lus10019442.g/Lus10027321.g/Lus10…	69
GO:2000022	BP	regulation of jasmonic acid mediated signaling pathway	7/2242	20/32470	0.00025772	0.0188995	0.0173321	scaffold732.45/Lus10011929.g/Lus10039911.g/Lus10027639.g/Lus10008129.g/Lus10013166.g/Lus10027648.g	7
GO:0030002	BP	cellular anion homeostasis	4/2242	6/32470	0.000303677	0.0196497	0.01802	Lus10035175.g/Lus10012556.g/Lus10002582.g/Lus10011337.g	4
GO:0030320	BP	cellular monovalent inorganic anion homeostasis	4/2242	6/32470	0.000303677	0.0196497	0.01802	Lus10035175.g/Lus10012556.g/Lus10002582.g/Lus10011337.g	4
GO:0030643	BP	cellular phosphate ion homeostasis	4/2242	6/32470	0.000303677	0.0196497	0.01802	Lus10035175.g/Lus10012556.g/Lus10002582.g/Lus10011337.g	4
GO:0046475	BP	glycerophospholipid catabolic process	4/2242	6/32470	0.000303677	0.0196497	0.01802	Lus10035175.g/Lus10012556.g/Lus10002582.g/Lus10011337.g	4
GO:0072501	BP	cellular divalent inorganic anion homeostasis	4/2242	6/32470	0.000303677	0.0196497	0.01802	Lus10035175.g/Lus10012556.g/Lus10002582.g/Lus10011337.g	4
GO:0072502	BP	cellular trivalent inorganic anion homeostasis	4/2242	6/32470	0.000303677	0.0196497	0.01802	Lus10035175.g/Lus10012556.g/Lus10002582.g/Lus10011337.g	4
GO:0004753	MF	saccharopine dehydrogenase activity	3/2242	3/32470	0.00032879	0.0197274	0.0180913	C8310011.1/Lus10038086.g/Lus10009808.g	3
GO:0004755	MF	saccharopine dehydrogenase (NADP+, L-glutamate-forming) activity	3/2242	3/32470	0.00032879	0.0197274	0.0180913	C8310011.1/Lus10038086.g/Lus10009808.g	3
GO:0042753	BP	positive regulation of circadian rhythm	3/2242	3/32470	0.00032879	0.0197274	0.0180913	Lus10002900.g/Lus10002028.g/Lus10003810.g	3
GO:0047130	MF	saccharopine dehydrogenase (NADP+, L-lysine-forming) activity	3/2242	3/32470	0.00032879	0.0197274	0.0180913	C8310011.1/Lus10038086.g/Lus10009808.g	3
GO:0007568	BP	aging	11/2242	48/32470	0.000345677	0.0203702	0.0186808	Lus10000310.g/Lus10015754.g/Lus10030446.g/Lus10011335.g/Lus10026617.g/Lus10037032.g/Lus10024927.g/Lus10027404.g/Lus10043200.g/Lus10035801.g/Lus10037156.g	11
GO:0006873	BP	cellular ion homeostasis	25/2242	173/32470	0.000364069	0.0210777	0.0193296	Lus10035730.g/Lus10039419.g/Lus10030514.g/Lus10016487.g/Lus10026946.g/Lus10040965.g/Lus10042946.g/Lus10002865.g/Lus10035175.g/Lus10012556.g/Lus10026944.g/Lus10010623.g/Lus10017730.g/Lus10040744.g/Lus10004465.g/Lus10033179.g/Lus10009598.g/Lus10010619.g/Lus10002582.g/Lus10042445.g/Lus10003259.g/Lus10002674.g/scaffold43.7/Lus10011337.g/Lus10039073.g	25
GO:0015085	MF	calcium ion transmembrane transporter activity	10/2242	41/32470	0.000373112	0.0212288	0.0194682	Lus10004819.g/Lus10035507.g/Lus10033386.g/Lus10042040.g/Lus10018594.g/Lus10040674.g/Lus10034840.g/Lus10002490.g/Lus10018687.g/Lus10018044.g	10
GO:0015291	MF	secondary active transmembrane transporter activity	50/2242	441/32470	0.000401061	0.0224322	0.0205718	Lus10027367.g/Lus10033814.g/Lus10004819.g/scaffold134.17/Lus10029668.g/Lus10025800.g/Lus10029966.g/Lus10035507.g/Lus10005685.g/Lus10016799.g/Lus10007231.g/Lus10035354.g/Lus10006171.g/Lus10012741.g/Lus10013626.g/Lus10026303.g/Lus10011288.g/Lus10033886.g/Lus10001334.g/Lus10003560.g/Lus10029970.g/Lus10018692.g/Lus10011826.g/Lus10040674.g/scaffold115.10/Lus10020307.g/Lus10039131.g/scaffold610.41/Lus1…	50
GO:0008081	MF	phosphoric diester hydrolase activity	17/2242	100/32470	0.000472575	0.0259916	0.023836	Lus10034483.g/Lus10033706.g/Lus10031634.g/Lus10029873.g/Lus10035175.g/Lus10012556.g/scaffold87.43/Lus10020672.g/Lus10025062.g/Lus10002582.g/Lus10021848.g/Lus10043171.g/Lus10014072.g/Lus10011337.g/Lus10042540.g/Lus10009894.g/Lus10040664.g	17
GO:0004722	MF	protein serine/threonine phosphatase activity	22/2242	147/32470	0.000490317	0.0265253	0.0243255	Lus10001832.g/Lus10034965.g/Lus10012962.g/Lus10009210.g/Lus10040738.g/Lus10019017.g/Lus10003399.g/Lus10006485.g/Lus10004703.g/Lus10016493.g/Lus10040270.g/Lus10005405.g/Lus10038058.g/scaffold196.293/Lus10041861.g/Lus10026908.g/Lus10001976.g/Lus10034062.g/Lus10020671.g/Lus10009993.g/Lus10037832.g/Lus10036689.g	22
GO:0071214	BP	cellular response to abiotic stimulus	13/2242	67/32470	0.000588582	0.0313277	0.0287296	Lus10000310.g/Lus10015754.g/Lus10011335.g/Lus10005783.g/Lus10002900.g/Lus10037819.g/Lus10038823.g/Lus10006818.g/Lus10002028.g/Lus10011777.g/Lus10007459.g/Lus10003810.g/Lus10015868.g	13
GO:0046173	BP	polyol biosynthetic process	4/2242	7/32470	0.000669692	0.0329848	0.0302493	Lus10000692.g/Lus10019671.g/Lus10018235.g/Lus10040669.g	4
GO:0055062	BP	phosphate ion homeostasis	4/2242	7/32470	0.000669692	0.0329848	0.0302493	Lus10035175.g/Lus10012556.g/Lus10002582.g/Lus10011337.g	4
GO:0055083	BP	monovalent inorganic anion homeostasis	4/2242	7/32470	0.000669692	0.0329848	0.0302493	Lus10035175.g/Lus10012556.g/Lus10002582.g/Lus10011337.g	4
GO:0072505	BP	divalent inorganic anion homeostasis	4/2242	7/32470	0.000669692	0.0329848	0.0302493	Lus10035175.g/Lus10012556.g/Lus10002582.g/Lus10011337.g	4
GO:0072506	BP	trivalent inorganic anion homeostasis	4/2242	7/32470	0.000669692	0.0329848	0.0302493	Lus10035175.g/Lus10012556.g/Lus10002582.g/Lus10011337.g	4
GO:0042752	BP	regulation of circadian rhythm	6/2242	17/32470	0.000685614	0.0332725	0.030513	Lus10005134.g/scaffold370.2/Lus10002900.g/Lus10002028.g/Lus10035332.g/Lus10003810.g	6
GO:0042162	MF	telomeric DNA binding	9/2242	37/32470	0.000743229	0.0355457	0.0325977	Lus10005783.g/Lus10006818.g/Lus10010844.g/Lus10016644.g/Lus10011320.g/Lus10023406.g/Lus10025203.g/Lus10012092.g/Lus10015868.g	9
GO:0055081	BP	anion homeostasis	5/2242	12/32470	0.000820133	0.0386634	0.0354569	Lus10003738.g/Lus10035175.g/Lus10012556.g/Lus10002582.g/Lus10011337.g	5
GO:0042221	BP	response to chemical	118/2242	1290/32470	0.00108151	0.0502673	0.0460984	Lus10042731.g/Lus10011824.g/Lus10035730.g/Lus10013155.g/Lus10003660.g/Lus10027367.g/Lus10027969.g/scaffold732.45/Lus10007283.g/Lus10021190.g/Lus10043186.g/Lus10005652.g/Lus10021369.g/Lus10024614.g/Lus10020719.g/scaffold134.17/scaffold1202.11/Lus10032252.g/Lus10014280.g/Lus10016487.g/Lus10029668.g/Lus10005619.g/Lus10010140.g/Lus10000659.g/Lus10026878.g/Lus10021240.g/Lus10028001.g/Lus10017049.g/Lus…	118
GO:0007623	BP	circadian rhythm	8/2242	32/32470	0.00119905	0.0527635	0.0483876	Lus10005134.g/scaffold370.2/Lus10002900.g/Lus10035472.g/Lus10002028.g/Lus10035332.g/Lus10007459.g/Lus10003810.g	8
GO:0016160	MF	amylase activity	8/2242	32/32470	0.00119905	0.0527635	0.0483876	Lus10004396.g/Lus10033976.g/Lus10012804.g/Lus10023698.g/Lus10023699.g/scaffold9.86/Lus10018491.g/Lus10030793.g	8
GO:0048511	BP	rhythmic process	8/2242	32/32470	0.00119905	0.0527635	0.0483876	Lus10005134.g/scaffold370.2/Lus10002900.g/Lus10035472.g/Lus10002028.g/Lus10035332.g/Lus10007459.g/Lus10003810.g	8
GO:0009835	BP	fruit ripening	3/2242	4/32470	0.00124714	0.0527635	0.0483876	Lus10030446.g/Lus10026617.g/Lus10037156.g	3
GO:0043564	CC	Ku70:Ku80 complex	3/2242	4/32470	0.00124714	0.0527635	0.0483876	Lus10005783.g/Lus10006818.g/Lus10015868.g	3
GO:0071481	BP	cellular response to X-ray	3/2242	4/32470	0.00124714	0.0527635	0.0483876	Lus10005783.g/Lus10006818.g/Lus10015868.g	3
GO:0071695	BP	anatomical structure maturation	3/2242	4/32470	0.00124714	0.0527635	0.0483876	Lus10030446.g/Lus10026617.g/Lus10037156.g	3
GO:0046503	BP	glycerolipid catabolic process	4/2242	8/32470	0.00126606	0.0528861	0.0485	Lus10035175.g/Lus10012556.g/Lus10002582.g/Lus10011337.g	4
GO:0015996	BP	chlorophyll catabolic process	6/2242	19/32470	0.00133346	0.0543262	0.0498207	Lus10024484.g/Lus10016369.g/Lus10019755.g/Lus10041348.g/Lus10039372.g/Lus10037370.g	6
GO:0046149	BP	pigment catabolic process	6/2242	19/32470	0.00133346	0.0543262	0.0498207	Lus10024484.g/Lus10016369.g/Lus10019755.g/Lus10041348.g/Lus10039372.g/Lus10037370.g	6
GO:0009414	BP	response to water deprivation	15/2242	91/32470	0.0013744	0.055311	0.0507238	Lus10013155.g/Lus10005652.g/Lus10024614.g/Lus10032252.g/Lus10010140.g/Lus10000659.g/Lus10028001.g/Lus10017977.g/Lus10011777.g/Lus10016273.g/Lus10036402.g/Lus10007905.g/Lus10016354.g/Lus10021827.g/Lus10001876.g	15
GO:0008324	MF	cation transmembrane transporter activity	68/2242	680/32470	0.00142125	0.0560713	0.051421	Lus10035730.g/Lus10033814.g/Lus10004819.g/Lus10016487.g/Lus10025800.g/scaffold156.172/Lus10029966.g/Lus10035507.g/Lus10010618.g/Lus10026946.g/Lus10005221.g/Lus10035354.g/Lus10032154.g/Lus10033386.g/Lus10018324.g/Lus10011288.g/Lus10042040.g/Lus10029970.g/Lus10008803.g/Lus10018594.g/Lus10037544.g/Lus10009789.g/Lus10018692.g/Lus10040674.g/Lus10034840.g/Lus10019442.g/Lus10004430.g/Lus10026944.g/Lus10…	68
GO:0072509	MF	divalent inorganic cation transmembrane transporter activity	17/2242	110/32470	0.00142727	0.0560713	0.051421	Lus10004819.g/Lus10016487.g/Lus10035507.g/Lus10033386.g/Lus10042040.g/Lus10008803.g/Lus10018594.g/Lus10040674.g/Lus10034840.g/Lus10040744.g/Lus10002490.g/Lus10009598.g/Lus10002674.g/Lus10018687.g/Lus10018044.g/Lus10024107.g/Lus10031872.g	17
GO:0015075	MF	ion transmembrane transporter activity	96/2242	1028/32470	0.00162756	0.0631875	0.0579471	Lus10000673.g/scaffold51.48/Lus10035730.g/Lus10027725.g/Lus10008352.g/Lus10005239.g/Lus10024614.g/Lus10033814.g/Lus10003903.g/Lus10004819.g/Lus10038148.g/Lus10030683.g/Lus10032252.g/Lus10016487.g/Lus10003738.g/Lus10025800.g/scaffold156.172/Lus10029966.g/Lus10035507.g/Lus10010618.g/Lus10026946.g/Lus10005221.g/Lus10035354.g/Lus10032154.g/Lus10033386.g/Lus10038639.g/Lus10029605.g/Lus10018324.g/Lus10…	96
GO:0051119	MF	sugar transmembrane transporter activity	20/2242	141/32470	0.00168994	0.0648465	0.0594685	Lus10000310.g/Lus10015754.g/Lus10011335.g/Lus10014932.g/Lus10033814.g/Lus10025800.g/Lus10029966.g/Lus10007691.g/Lus10035354.g/Lus10011288.g/Lus10029970.g/Lus10032815.g/Lus10028303.g/Lus10041748.g/Lus10003143.g/Lus10029962.g/Lus10018956.g/Lus10002783.g/Lus10040482.g/Lus10005870.g	20
GO:0047213	MF	anthocyanidin 3-O-glucosyltransferase activity	6/2242	20/32470	0.00179449	0.068067	0.0624219	Lus10003454.g/Lus10003455.g/Lus10039277.g/Lus10036840.g/Lus10036837.g/Lus10013500.g	6
GO:0006855	BP	drug transmembrane transport	16/2242	103/32470	0.00183973	0.0689898	0.0632682	Lus10027367.g/scaffold134.17/Lus10029668.g/Lus10005685.g/Lus10007231.g/Lus10006171.g/Lus10012741.g/Lus10013626.g/Lus10026303.g/Lus10020307.g/Lus10028540.g/Lus10002645.g/Lus10015903.g/Lus10023943.g/Lus10042365.g/Lus10042344.g	16
GO:0016701	MF	oxidoreductase activity, acting on single donors with incorporation of molecular oxygen	17/2242	113/32470	0.00192355	0.0713228	0.0654076	Lus10028135.g/Lus10026246.g/Lus10026185.g/Lus10042481.g/Lus10042839.g/Lus10006198.g/Lus10029820.g/Lus10041348.g/Lus10042424.g/Lus10037370.g/Lus10021902.g/Lus10005390.g/Lus10042482.g/Lus10012280.g/Lus10020740.g/Lus10031809.g/Lus10031236.g	17
GO:0089701	CC	U2AF	4/2242	9/32470	0.00215447	0.0789972	0.0724456	Lus10009389.g/Lus10038139.g/Lus10020540.g/Lus10008648.g	4
GO:0015893	BP	drug transport	16/2242	105/32470	0.0022529	0.0808105	0.0741085	Lus10027367.g/scaffold134.17/Lus10029668.g/Lus10005685.g/Lus10007231.g/Lus10006171.g/Lus10012741.g/Lus10013626.g/Lus10026303.g/Lus10020307.g/Lus10028540.g/Lus10002645.g/Lus10015903.g/Lus10023943.g/Lus10042365.g/Lus10042344.g	16
GO:0042493	BP	response to drug	16/2242	105/32470	0.0022529	0.0808105	0.0741085	Lus10027367.g/scaffold134.17/Lus10029668.g/Lus10005685.g/Lus10007231.g/Lus10006171.g/Lus10012741.g/Lus10013626.g/Lus10026303.g/Lus10020307.g/Lus10028540.g/Lus10002645.g/Lus10015903.g/Lus10023943.g/Lus10042365.g/Lus10042344.g	16
GO:0055080	BP	cation homeostasis	27/2242	218/32470	0.00234797	0.0833151	0.0764054	Lus10035730.g/Lus10039419.g/Lus10030514.g/Lus10016487.g/Lus10026946.g/Lus10007231.g/Lus10040965.g/Lus10042946.g/Lus10002865.g/Lus10026944.g/Lus10010623.g/Lus10017730.g/Lus10039131.g/Lus10040744.g/Lus10005934.g/Lus10004465.g/Lus10033179.g/Lus10009598.g/Lus10015268.g/Lus10010619.g/Lus10018989.g/Lus10042445.g/Lus10003259.g/Lus10002674.g/scaffold43.7/Lus10033840.g/Lus10039073.g	27
GO:0006012	BP	galactose metabolic process	7/2242	28/32470	0.00241664	0.084103	0.077128	scaffold98.117/Lus10037789.g/Lus10034595.g/Lus10038423.g/Lus10010897.g/Lus10031434.g/Lus10016320.g	7
GO:0015297	MF	antiporter activity	30/2242	251/32470	0.00242115	0.084103	0.077128	Lus10027367.g/Lus10004819.g/scaffold134.17/Lus10029668.g/Lus10035507.g/Lus10005685.g/Lus10007231.g/Lus10006171.g/Lus10012741.g/Lus10013626.g/Lus10026303.g/Lus10001334.g/Lus10018692.g/Lus10040674.g/Lus10020307.g/Lus10039131.g/Lus10002490.g/Lus10028540.g/Lus10005934.g/Lus10015268.g/Lus10002645.g/Lus10035765.g/Lus10018989.g/Lus10015903.g/Lus10033840.g/Lus10023943.g/Lus10042365.g/Lus10009829.g/Lus100…	30
GO:0009064	BP	glutamine family amino acid metabolic process	18/2242	126/32470	0.00259036	0.0877298	0.080454	Lus10004697.g/Lus10014407.g/Lus10040264.g/Lus10001018.g/Lus10001016.g/Lus10004696.g/Lus10040263.g/Lus10001019.g/Lus10037544.g/Lus10040262.g/Lus10034095.g/Lus10030158.g/Lus10034094.g/Lus10012536.g/Lus10019103.g/Lus10033793.g/Lus10010505.g/Lus10016354.g	18
GO:0000795	CC	synaptonemal complex	5/2242	15/32470	0.00261098	0.0877298	0.080454	Lus10034734.g/Lus10041143.g/Lus10010242.g/Lus10033274.g/Lus10036517.g	5
GO:0099086	CC	synaptonemal structure	5/2242	15/32470	0.00261098	0.0877298	0.080454	Lus10034734.g/Lus10041143.g/Lus10010242.g/Lus10033274.g/Lus10036517.g	5
GO:0071478	BP	cellular response to radiation	10/2242	52/32470	0.0026319	0.0877298	0.080454	Lus10005783.g/Lus10002900.g/Lus10037819.g/Lus10038823.g/Lus10006818.g/Lus10002028.g/Lus10011777.g/Lus10007459.g/Lus10003810.g/Lus10015868.g	10
GO:0070838	BP	divalent metal ion transport	15/2242	98/32470	0.00291262	0.0951649	0.0872725	Lus10004819.g/Lus10035507.g/Lus10033386.g/Lus10042040.g/Lus10008803.g/Lus10018594.g/Lus10040674.g/Lus10034840.g/Lus10002490.g/Lus10003611.g/Lus10002674.g/Lus10018687.g/Lus10018044.g/Lus10024107.g/Lus10031872.g	15
GO:0072511	BP	divalent inorganic cation transport	15/2242	98/32470	0.00291262	0.0951649	0.0872725	Lus10004819.g/Lus10035507.g/Lus10033386.g/Lus10042040.g/Lus10008803.g/Lus10018594.g/Lus10040674.g/Lus10034840.g/Lus10002490.g/Lus10003611.g/Lus10002674.g/Lus10018687.g/Lus10018044.g/Lus10024107.g/Lus10031872.g	15
GO:0010165	BP	response to X-ray	3/2242	5/32470	0.00295717	0.0956731	0.0877384	Lus10005783.g/Lus10006818.g/Lus10015868.g	3
GO:0034220	BP	ion transmembrane transport	51/2242	496/32470	0.00299711	0.096024	0.0880603	scaffold51.48/Lus10035730.g/Lus10040652.g/Lus10008352.g/Lus10005239.g/Lus10003903.g/Lus10030683.g/scaffold156.172/Lus10010618.g/Lus10026946.g/Lus10032154.g/Lus10033386.g/Lus10038639.g/Lus10029605.g/Lus10018324.g/Lus10001334.g/Lus10037895.g/Lus10042040.g/Lus10018594.g/Lus10037544.g/Lus10009789.g/Lus10018692.g/Lus10035281.g/Lus10034840.g/Lus10027321.g/Lus10026944.g/Lus10010623.g/Lus10042864.g/Lus10…	51
GO:0016161	MF	beta-amylase activity	6/2242	22/32470	0.00306629	0.0963692	0.0883768	Lus10004396.g/Lus10033976.g/Lus10012804.g/Lus10023698.g/Lus10023699.g/Lus10018491.g	6
GO:0016646	MF	oxidoreductase activity, acting on the CH-NH group of donors, NAD or NADP as acceptor	6/2242	22/32470	0.00306629	0.0963692	0.0883768	C8310011.1/Lus10038086.g/Lus10004264.g/Lus10009808.g/Lus10042174.g/Lus10019103.g	6
GO:0010035	BP	response to inorganic substance	29/2242	245/32470	0.0032583	0.101421	0.09301	Lus10035730.g/Lus10013155.g/Lus10005652.g/Lus10024614.g/Lus10032252.g/Lus10014280.g/Lus10016487.g/Lus10010140.g/Lus10000659.g/Lus10021240.g/Lus10028001.g/Lus10021940.g/Lus10017977.g/Lus10040744.g/Lus10025845.g/Lus10011777.g/Lus10016273.g/Lus10036402.g/Lus10009598.g/Lus10007905.g/Lus10037630.g/Lus10043103.g/Lus10019636.g/Lus10016354.g/Lus10002674.g/Lus10008964.g/Lus10021827.g/scaffold863.77/Lus100…	29
GO:0065008	BP	regulation of biological quality	88/2242	952/32470	0.00328851	0.101421	0.09301	Lus10003845.g/Lus10035730.g/scaffold272.125/Lus10040652.g/Lus10039419.g/Lus10026471.g/Lus10030514.g/Lus10016487.g/Lus10003738.g/Lus10003194.g/Lus10026946.g/Lus10005783.g/Lus10008098.g/Lus10026878.g/Lus10020908.g/Lus10005221.g/Lus10007231.g/Lus10024289.g/Lus10040965.g/Lus10020193.g/Lus10034734.g/Lus10011093.g/Lus10037895.g/Lus10042946.g/Lus10002865.g/Lus10018594.g/Lus10035281.g/Lus10022636.g/Lus10…	88
GO:0004028	MF	3-chloroallyl aldehyde dehydrogenase activity	5/2242	16/32470	0.00358367	0.109501	0.10042	Lus10013155.g/Lus10004264.g/Lus10042174.g/Lus10042724.g/Lus10029684.g	5
GO:0015171	MF	amino acid transmembrane transporter activity	18/2242	130/32470	0.00365026	0.110512	0.101347	scaffold51.48/Lus10008352.g/Lus10005239.g/Lus10003903.g/Lus10030683.g/Lus10003738.g/Lus10038639.g/Lus10001334.g/Lus10037544.g/Lus10018692.g/Lus10004430.g/Lus10042864.g/Lus10038640.g/Lus10001908.g/Lus10028165.g/Lus10012444.g/Lus10041482.g/Lus10039180.g	18
GO:0006787	BP	porphyrin-containing compound catabolic process	6/2242	23/32470	0.00390908	0.112134	0.102835	Lus10024484.g/Lus10016369.g/Lus10019755.g/Lus10041348.g/Lus10039372.g/Lus10037370.g	6
GO:0033015	BP	tetrapyrrole catabolic process	6/2242	23/32470	0.00390908	0.112134	0.102835	Lus10024484.g/Lus10016369.g/Lus10019755.g/Lus10041348.g/Lus10039372.g/Lus10037370.g	6
GO:0051187	BP	cofactor catabolic process	6/2242	23/32470	0.00390908	0.112134	0.102835	Lus10024484.g/Lus10016369.g/Lus10019755.g/Lus10041348.g/Lus10039372.g/Lus10037370.g	6
GO:1902679	BP	negative regulation of RNA biosynthetic process	20/2242	152/32470	0.00410865	0.112134	0.102835	Lus10005134.g/scaffold732.45/scaffold370.2/Lus10012202.g/Lus10008007.g/Lus10019348.g/Lus10007849.g/Lus10011929.g/Lus10009351.g/Lus10039911.g/Lus10004759.g/Lus10043200.g/Lus10027639.g/Lus10008129.g/Lus10024485.g/Lus10021650.g/Lus10013166.g/Lus10027648.g/Lus10041718.g/Lus10043433.g	20
GO:1903507	BP	negative regulation of nucleic acid-templated transcription	20/2242	152/32470	0.00410865	0.112134	0.102835	Lus10005134.g/scaffold732.45/scaffold370.2/Lus10012202.g/Lus10008007.g/Lus10019348.g/Lus10007849.g/Lus10011929.g/Lus10009351.g/Lus10039911.g/Lus10004759.g/Lus10043200.g/Lus10027639.g/Lus10008129.g/Lus10024485.g/Lus10021650.g/Lus10013166.g/Lus10027648.g/Lus10041718.g/Lus10043433.g	20
GO:0022890	MF	inorganic cation transmembrane transporter activity	51/2242	505/32470	0.0042867	0.112134	0.102835	Lus10035730.g/Lus10004819.g/Lus10016487.g/scaffold156.172/Lus10035507.g/Lus10010618.g/Lus10026946.g/Lus10005221.g/Lus10032154.g/Lus10033386.g/Lus10018324.g/Lus10042040.g/Lus10008803.g/Lus10018594.g/Lus10009789.g/Lus10040674.g/Lus10034840.g/Lus10019442.g/Lus10026944.g/Lus10010623.g/Lus10039131.g/Lus10004413.g/Lus10040744.g/Lus10031320.g/Lus10002490.g/Lus10005934.g/Lus10009819.g/Lus10004605.g/Lus10…	51
GO:0000781	CC	chromosome, telomeric region	9/2242	47/32470	0.00436667	0.112134	0.102835	Lus10005783.g/Lus10006818.g/Lus10010844.g/Lus10016644.g/Lus10011320.g/Lus10023406.g/Lus10025203.g/Lus10012092.g/Lus10015868.g	9
GO:0000784	CC	nuclear chromosome, telomeric region	9/2242	47/32470	0.00436667	0.112134	0.102835	Lus10005783.g/Lus10006818.g/Lus10010844.g/Lus10016644.g/Lus10011320.g/Lus10023406.g/Lus10025203.g/Lus10012092.g/Lus10015868.g	9
GO:0009070	BP	serine family amino acid biosynthetic process	9/2242	47/32470	0.00436667	0.112134	0.102835	Lus10014658.g/C8303341.1/Lus10014765.g/Lus10015947.g/Lus10032150.g/Lus10021156.g/Lus10004118.g/Lus10005333.g/Lus10037334.g	9
GO:0005985	BP	sucrose metabolic process	7/2242	31/32470	0.0044754	0.112134	0.102835	Lus10004340.g/Lus10010308.g/Lus10013417.g/Lus10001468.g/Lus10028922.g/Lus10020506.g/Lus10007372.g	7
GO:0046434	BP	organophosphate catabolic process	7/2242	31/32470	0.0044754	0.112134	0.102835	Lus10035175.g/Lus10012556.g/Lus10029160.g/Lus10020672.g/scaffold261.42/Lus10002582.g/Lus10011337.g	7
GO:0003842	MF	1-pyrroline-5-carboxylate dehydrogenase activity	2/2242	2/32470	0.0047657	0.112134	0.102835	Lus10004264.g/Lus10042174.g	2
GO:0003868	MF	4-hydroxyphenylpyruvate dioxygenase activity	2/2242	2/32470	0.0047657	0.112134	0.102835	Lus10029820.g/Lus10020740.g	2
GO:0004411	MF	homogentisate 1,2-dioxygenase activity	2/2242	2/32470	0.0047657	0.112134	0.102835	Lus10028135.g/Lus10042839.g	2
GO:0004512	MF	inositol-3-phosphate synthase activity	2/2242	2/32470	0.0047657	0.112134	0.102835	Lus10000692.g/Lus10019671.g	2
GO:0004587	MF	ornithine-oxo-acid transaminase activity	2/2242	2/32470	0.0047657	0.112134	0.102835	Lus10023299.g/Lus10038510.g	2
GO:0004708	MF	MAP kinase kinase activity	2/2242	2/32470	0.0047657	0.112134	0.102835	Lus10022265.g/Lus10001137.g	2
GO:0005712	CC	chiasma	2/2242	2/32470	0.0047657	0.112134	0.102835	Lus10034734.g/Lus10033274.g	2
GO:0006021	BP	inositol biosynthetic process	2/2242	2/32470	0.0047657	0.112134	0.102835	Lus10000692.g/Lus10019671.g	2
GO:0008117	MF	sphinganine-1-phosphate aldolase activity	2/2242	2/32470	0.0047657	0.112134	0.102835	Lus10011345.g/Lus10003129.g	2
GO:0016708	MF	oxidoreductase activity, acting on paired donors, with incorporation or reduction of molecular oxygen, NAD(P)H as one donor, and incorporation of two atoms of oxygen into one donor	2/2242	2/32470	0.0047657	0.112134	0.102835	Lus10032689.g/Lus10008571.g	2
GO:0018489	MF	vanillate monooxygenase activity	2/2242	2/32470	0.0047657	0.112134	0.102835	Lus10026246.g/Lus10042424.g	2
GO:0019133	MF	choline monooxygenase activity	2/2242	2/32470	0.0047657	0.112134	0.102835	Lus10032689.g/Lus10008571.g	2
GO:0019140	MF	inositol 3-kinase activity	2/2242	2/32470	0.0047657	0.112134	0.102835	Lus10018235.g/Lus10040669.g	2
GO:0019237	MF	centromeric DNA binding	2/2242	2/32470	0.0047657	0.112134	0.102835	Lus10011470.g/Lus10023105.g	2
GO:0031539	BP	positive regulation of anthocyanin metabolic process	2/2242	2/32470	0.0047657	0.112134	0.102835	Lus10002900.g/Lus10002028.g	2
GO:0032441	MF	pheophorbide a oxygenase activity	2/2242	2/32470	0.0047657	0.112134	0.102835	Lus10041348.g/Lus10037370.g	2
GO:0042736	MF	NADH kinase activity	2/2242	2/32470	0.0047657	0.112134	0.102835	Lus10009958.g/Lus10003178.g	2
GO:0047216	MF	inositol 3-alpha-galactosyltransferase activity	2/2242	2/32470	0.0047657	0.112134	0.102835	Lus10010897.g/Lus10031434.g	2
GO:0080162	BP	intracellular auxin transport	2/2242	2/32470	0.0047657	0.112134	0.102835	Lus10020193.g/Lus10026994.g	2
GO:0009074	BP	aromatic amino acid family catabolic process	5/2242	17/32470	0.0047912	0.112134	0.102835	Lus10028135.g/Lus10042839.g/Lus10019822.g/Lus10014091.g/Lus10014092.g	5
GO:0046165	BP	alcohol biosynthetic process	5/2242	17/32470	0.0047912	0.112134	0.102835	Lus10000692.g/Lus10019671.g/Lus10016354.g/Lus10018235.g/Lus10040669.g	5
GO:0055082	BP	cellular chemical homeostasis	28/2242	241/32470	0.00490756	0.112987	0.103616	Lus10035730.g/Lus10040652.g/Lus10039419.g/Lus10030514.g/Lus10016487.g/Lus10026946.g/Lus10040965.g/Lus10037895.g/Lus10042946.g/Lus10002865.g/Lus10035281.g/Lus10035175.g/Lus10012556.g/Lus10026944.g/Lus10010623.g/Lus10017730.g/Lus10040744.g/Lus10004465.g/Lus10033179.g/Lus10009598.g/Lus10010619.g/Lus10002582.g/Lus10042445.g/Lus10003259.g/Lus10002674.g/scaffold43.7/Lus10011337.g/Lus10039073.g	28
GO:0070588	BP	calcium ion transmembrane transport	6/2242	24/32470	0.00491177	0.112987	0.103616	Lus10033386.g/Lus10042040.g/Lus10034840.g/Lus10003611.g/Lus10018687.g/Lus10018044.g	6
GO:0030003	BP	cellular cation homeostasis	21/2242	165/32470	0.00493034	0.112987	0.103616	Lus10035730.g/Lus10039419.g/Lus10030514.g/Lus10016487.g/Lus10026946.g/Lus10040965.g/Lus10042946.g/Lus10002865.g/Lus10026944.g/Lus10010623.g/Lus10017730.g/Lus10040744.g/Lus10004465.g/Lus10033179.g/Lus10009598.g/Lus10010619.g/Lus10042445.g/Lus10003259.g/Lus10002674.g/scaffold43.7/Lus10039073.g	21
GO:0015369	MF	calcium:proton antiporter activity	4/2242	11/32470	0.00504548	0.114042	0.104584	Lus10004819.g/Lus10035507.g/Lus10040674.g/Lus10002490.g	4
GO:0015385	MF	sodium:proton antiporter activity	4/2242	11/32470	0.00504548	0.114042	0.104584	Lus10039131.g/Lus10005934.g/Lus10018989.g/Lus10033840.g	4
GO:0016042	BP	lipid catabolic process	20/2242	155/32470	0.00512569	0.115066	0.105523	Lus10020908.g/Lus10033706.g/Lus10036526.g/Lus10024927.g/Lus10031634.g/Lus10011345.g/Lus10041402.g/Lus10027485.g/Lus10035175.g/Lus10012556.g/Lus10024038.g/Lus10020672.g/Lus10012306.g/Lus10022349.g/Lus10003129.g/Lus10002582.g/Lus10011337.g/Lus10009894.g/Lus10039240.g/Lus10040664.g	20
GO:0090567	BP	reproductive shoot system development	24/2242	198/32470	0.00520327	0.116019	0.106397	Lus10030446.g/scaffold272.125/Lus10027969.g/Lus10005106.g/Lus10017223.g/Lus10002500.g/Lus10026617.g/Lus10037032.g/Lus10004646.g/Lus10041348.g/Lus10022636.g/Lus10041794.g/Lus10000639.g/Lus10027404.g/Lus10023694.g/Lus10037370.g/Lus10007459.g/Lus10038582.g/Lus10043200.g/Lus10019636.g/Lus10037882.g/Lus10018061.g/Lus10037156.g/Lus10000285.g	24
GO:0045934	BP	negative regulation of nucleobase-containing compound metabolic process	22/2242	177/32470	0.00540603	0.119453	0.109546	Lus10005134.g/scaffold732.45/scaffold370.2/Lus10021767.g/Lus10012202.g/Lus10008007.g/Lus10019348.g/Lus10007849.g/Lus10011929.g/Lus10009351.g/Lus10039911.g/Lus10004759.g/Lus10043200.g/Lus10027639.g/Lus10017724.g/Lus10008129.g/Lus10024485.g/Lus10021650.g/Lus10013166.g/Lus10027648.g/Lus10041718.g/Lus10043433.g	22
GO:0051253	BP	negative regulation of RNA metabolic process	20/2242	156/32470	0.00550756	0.119453	0.109546	Lus10005134.g/scaffold732.45/scaffold370.2/Lus10012202.g/Lus10008007.g/Lus10019348.g/Lus10007849.g/Lus10011929.g/Lus10009351.g/Lus10039911.g/Lus10004759.g/Lus10043200.g/Lus10027639.g/Lus10008129.g/Lus10024485.g/Lus10021650.g/Lus10013166.g/Lus10027648.g/Lus10041718.g/Lus10043433.g	20
GO:0003988	MF	acetyl-CoA C-acyltransferase activity	3/2242	6/32470	0.00561066	0.119453	0.109546	Lus10039109.g/Lus10022812.g/Lus10011879.g	3
GO:0015112	MF	nitrate transmembrane transporter activity	3/2242	6/32470	0.00561066	0.119453	0.109546	Lus10000673.g/Lus10024614.g/Lus10032252.g	3
GO:0015232	MF	heme transporter activity	3/2242	6/32470	0.00561066	0.119453	0.109546	Lus10028810.g/Lus10038681.g/Lus10037947.g	3
GO:0015439	MF	heme-transporting ATPase activity	3/2242	6/32470	0.00561066	0.119453	0.109546	Lus10028810.g/Lus10038681.g/Lus10037947.g	3
GO:0103115	MF	protoheme IX ABC transporter activity	3/2242	6/32470	0.00561066	0.119453	0.109546	Lus10028810.g/Lus10038681.g/Lus10037947.g	3
GO:0009639	BP	response to red or far red light	12/2242	76/32470	0.00569579	0.120488	0.110495	Lus10017223.g/Lus10006369.g/Lus10002900.g/Lus10035472.g/Lus10037819.g/Lus10038823.g/Lus10002028.g/Lus10035332.g/Lus10007459.g/Lus10003810.g/Lus10021270.g/Lus10031087.g	12
GO:0030170	MF	pyridoxal phosphate binding	23/2242	189/32470	0.0058518	0.122221	0.112085	Lus10017934.g/Lus10022137.g/Lus10039861.g/Lus10033661.g/Lus10007754.g/Lus10007021.g/Lus10013676.g/Lus10011345.g/Lus10018692.g/scaffold464.140/Lus10014765.g/Lus10017705.g/Lus10017333.g/Lus10003810.g/Lus10017704.g/Lus10011101.g/Lus10015947.g/Lus10003129.g/Lus10023299.g/Lus10038510.g/Lus10042923.g/Lus10004118.g/Lus10009086.g	23
GO:0070279	MF	vitamin B6 binding	23/2242	189/32470	0.0058518	0.122221	0.112085	Lus10017934.g/Lus10022137.g/Lus10039861.g/Lus10033661.g/Lus10007754.g/Lus10007021.g/Lus10013676.g/Lus10011345.g/Lus10018692.g/scaffold464.140/Lus10014765.g/Lus10017705.g/Lus10017333.g/Lus10003810.g/Lus10017704.g/Lus10011101.g/Lus10015947.g/Lus10003129.g/Lus10023299.g/Lus10038510.g/Lus10042923.g/Lus10004118.g/Lus10009086.g	23
GO:0007165	BP	signal transduction	108/2242	1230/32470	0.00602744	0.125098	0.114723	Lus10004645.g/Lus10030229.g/Lus10026667.g/Lus10042731.g/Lus10025245.g/scaffold231.9/Lus10011824.g/Lus10005618.g/Lus10027969.g/scaffold732.45/Lus10039404.g/Lus10007283.g/Lus10021190.g/Lus10040044.g/Lus10020719.g/Lus10017252.g/scaffold244.27/Lus10007284.g/scaffold1202.11/Lus10005619.g/Lus10024192.g/Lus10000659.g/Lus10006369.g/Lus10028001.g/Lus10002900.g/Lus10003460.g/Lus10036667.g/Lus10037819.g/Lus…	108
GO:0010029	BP	regulation of seed germination	5/2242	18/32470	0.00626142	0.128408	0.117759	Lus10021369.g/Lus10000659.g/Lus10028001.g/Lus10017049.g/Lus10027477.g	5
GO:0003714	MF	transcription corepressor activity	8/2242	41/32470	0.00626476	0.128408	0.117759	scaffold732.45/Lus10011929.g/Lus10039911.g/Lus10027639.g/Lus10008129.g/Lus10021650.g/Lus10013166.g/Lus10027648.g	8
GO:0023052	BP	signaling	108/2242	1233/32470	0.00646516	0.13089	0.120034	Lus10004645.g/Lus10030229.g/Lus10026667.g/Lus10042731.g/Lus10025245.g/scaffold231.9/Lus10011824.g/Lus10005618.g/Lus10027969.g/scaffold732.45/Lus10039404.g/Lus10007283.g/Lus10021190.g/Lus10040044.g/Lus10020719.g/Lus10017252.g/scaffold244.27/Lus10007284.g/scaffold1202.11/Lus10005619.g/Lus10024192.g/Lus10000659.g/Lus10006369.g/Lus10028001.g/Lus10002900.g/Lus10003460.g/Lus10036667.g/Lus10037819.g/Lus…	108
GO:0044700	BP	signaling	108/2242	1233/32470	0.00646516	0.13089	0.120034	Lus10004645.g/Lus10030229.g/Lus10026667.g/Lus10042731.g/Lus10025245.g/scaffold231.9/Lus10011824.g/Lus10005618.g/Lus10027969.g/scaffold732.45/Lus10039404.g/Lus10007283.g/Lus10021190.g/Lus10040044.g/Lus10020719.g/Lus10017252.g/scaffold244.27/Lus10007284.g/scaffold1202.11/Lus10005619.g/Lus10024192.g/Lus10000659.g/Lus10006369.g/Lus10028001.g/Lus10002900.g/Lus10003460.g/Lus10036667.g/Lus10037819.g/Lus…	108
GO:0071229	BP	cellular response to acid chemical	25/2242	213/32470	0.0066491	0.133793	0.122697	Lus10042731.g/Lus10011824.g/Lus10027969.g/scaffold732.45/Lus10021190.g/Lus10020719.g/scaffold1202.11/Lus10005619.g/Lus10000659.g/Lus10028001.g/Lus10002900.g/Lus10036667.g/Lus10037032.g/Lus10014657.g/Lus10011929.g/Lus10039911.g/Lus10002028.g/Lus10017251.g/Lus10041093.g/Lus10015009.g/Lus10027639.g/Lus10035801.g/Lus10008129.g/Lus10013166.g/Lus10027648.g	25
GO:0098662	BP	inorganic cation transmembrane transport	27/2242	236/32470	0.00692999	0.1386	0.127105	Lus10035730.g/scaffold156.172/Lus10010618.g/Lus10026946.g/Lus10032154.g/Lus10033386.g/Lus10018324.g/Lus10042040.g/Lus10009789.g/Lus10034840.g/Lus10026944.g/Lus10010623.g/Lus10009819.g/Lus10033179.g/Lus10040925.g/Lus10033934.g/Lus10010619.g/Lus10003611.g/Lus10014531.g/Lus10042445.g/Lus10003259.g/Lus10033382.g/Lus10018687.g/Lus10037904.g/Lus10018044.g/Lus10024107.g/Lus10031872.g	27
GO:0008643	BP	carbohydrate transport	25/2242	214/32470	0.0070483	0.140117	0.128496	Lus10000310.g/Lus10015754.g/Lus10011335.g/Lus10014932.g/Lus10033814.g/Lus10025800.g/Lus10029966.g/Lus10018992.g/Lus10007691.g/Lus10035354.g/Lus10029605.g/Lus10011288.g/Lus10029970.g/Lus10010534.g/Lus10032815.g/Lus10028303.g/Lus10041748.g/Lus10025565.g/Lus10003143.g/Lus10029962.g/Lus10018956.g/C8309935.1/Lus10002783.g/Lus10040482.g/Lus10005870.g	25
GO:0004300	MF	enoyl-CoA hydratase activity	4/2242	12/32470	0.00715815	0.140606	0.128945	Lus10037777.g/Lus10043253.g/Lus10016920.g/Lus10007334.g	4
GO:0015368	MF	calcium:cation antiporter activity	4/2242	12/32470	0.00715815	0.140606	0.128945	Lus10004819.g/Lus10035507.g/Lus10040674.g/Lus10002490.g	4
GO:0048878	BP	chemical homeostasis	40/2242	387/32470	0.00721978	0.140978	0.129286	Lus10035730.g/scaffold272.125/Lus10040652.g/Lus10039419.g/Lus10030514.g/Lus10016487.g/Lus10003738.g/Lus10026946.g/Lus10020908.g/Lus10007231.g/Lus10040965.g/Lus10020193.g/Lus10037895.g/Lus10042946.g/Lus10002865.g/Lus10035281.g/Lus10035175.g/Lus10041794.g/Lus10012556.g/Lus10026944.g/Lus10010623.g/Lus10017730.g/Lus10039131.g/Lus10040744.g/Lus10005934.g/Lus10004465.g/Lus10033179.g/Lus10009598.g/Lus10…	40
GO:0005978	BP	glycogen biosynthetic process	6/2242	26/32470	0.00746354	0.144881	0.132865	Lus10027725.g/Lus10012264.g/Lus10023553.g/Lus10034595.g/Lus10016012.g/Lus10040437.g	6
GO:0000723	BP	telomere maintenance	9/2242	51/32470	0.00761194	0.145474	0.133409	Lus10005783.g/Lus10006818.g/Lus10010844.g/Lus10016644.g/Lus10011320.g/Lus10023406.g/Lus10025203.g/Lus10012092.g/Lus10015868.g	9
GO:0032200	BP	telomere organization	9/2242	51/32470	0.00761194	0.145474	0.133409	Lus10005783.g/Lus10006818.g/Lus10010844.g/Lus10016644.g/Lus10011320.g/Lus10023406.g/Lus10025203.g/Lus10012092.g/Lus10015868.g	9
GO:0006865	BP	amino acid transport	17/2242	129/32470	0.00762635	0.145474	0.133409	scaffold51.48/Lus10008352.g/Lus10005239.g/Lus10003903.g/Lus10030683.g/Lus10003738.g/Lus10038639.g/Lus10001334.g/Lus10037544.g/Lus10018692.g/Lus10042864.g/Lus10038640.g/Lus10001908.g/Lus10028165.g/Lus10012444.g/Lus10041482.g/Lus10039180.g	17
GO:0042592	BP	homeostatic process	62/2242	656/32470	0.00771133	0.146249	0.13412	Lus10035730.g/scaffold272.125/Lus10040652.g/Lus10039419.g/Lus10030514.g/Lus10016487.g/Lus10003738.g/Lus10003194.g/Lus10026946.g/Lus10005783.g/Lus10026878.g/Lus10020908.g/Lus10007231.g/Lus10040965.g/Lus10020193.g/Lus10037895.g/Lus10042946.g/Lus10002865.g/Lus10035281.g/Lus10035175.g/Lus10041794.g/Lus10012556.g/Lus10006818.g/Lus10026944.g/Lus10003437.g/Lus10010623.g/Lus10017730.g/Lus10039131.g/Lus10…	62
GO:1901607	BP	alpha-amino acid biosynthetic process	29/2242	261/32470	0.00787237	0.14845	0.136139	Lus10004697.g/Lus10014407.g/Lus10040264.g/Lus10014658.g/Lus10001018.g/Lus10001016.g/Lus10008521.g/C8303341.1/Lus10004696.g/Lus10040263.g/Lus10001019.g/Lus10029955.g/Lus10037544.g/scaffold464.140/Lus10014765.g/Lus10040262.g/Lus10030158.g/Lus10012536.g/Lus10021902.g/Lus10019103.g/Lus10010505.g/Lus10015947.g/Lus10032150.g/Lus10015966.g/Lus10016354.g/Lus10021156.g/Lus10004118.g/Lus10005333.g/Lus10037…	29
GO:0005887	CC	integral component of plasma membrane	39/2242	378/32470	0.00812961	0.15243	0.139789	Lus10000310.g/Lus10015754.g/Lus10040652.g/Lus10011335.g/Lus10033814.g/Lus10029966.g/Lus10026946.g/Lus10007691.g/Lus10005221.g/Lus10035354.g/Lus10033386.g/Lus10011288.g/Lus10001334.g/Lus10037895.g/Lus10042040.g/Lus10029970.g/Lus10009789.g/Lus10018692.g/Lus10035281.g/Lus10011826.g/Lus10034840.g/scaffold115.10/Lus10026944.g/scaffold610.41/Lus10031320.g/Lus10031891.g/Lus10032815.g/Lus10042445.g/Lus10…	39
GO:0004721	MF	phosphoprotein phosphatase activity	34/2242	320/32470	0.00840517	0.156706	0.14371	Lus10001832.g/Lus10034965.g/Lus10012962.g/Lus10009210.g/Lus10040738.g/Lus10019017.g/Lus10003399.g/Lus10006485.g/Lus10004703.g/Lus10016493.g/Lus10040270.g/Lus10021940.g/Lus10004596.g/Lus10005405.g/Lus10038058.g/Lus10005218.g/scaffold80.16/scaffold196.293/Lus10041861.g/Lus10026908.g/Lus10001976.g/Lus10028639.g/Lus10030810.g/Lus10034062.g/Lus10000417.g/Lus10018937.g/Lus10024474.g/Lus10039540.g/Lus10…	34
GO:0003333	BP	amino acid transmembrane transport	16/2242	120/32470	0.00847334	0.15709	0.144062	scaffold51.48/Lus10008352.g/Lus10005239.g/Lus10003903.g/Lus10030683.g/Lus10038639.g/Lus10001334.g/Lus10037544.g/Lus10018692.g/Lus10042864.g/Lus10038640.g/Lus10001908.g/Lus10028165.g/Lus10012444.g/Lus10041482.g/Lus10039180.g	16
GO:0035251	MF	UDP-glucosyltransferase activity	35/2242	332/32470	0.00852574	0.157178	0.144143	Lus10032415.g/Lus10010308.g/Lus10024583.g/Lus10003454.g/scaffold1247.34/Lus10013417.g/Lus10023057.g/Lus10028572.g/Lus10001468.g/Lus10042262.g/Lus10003455.g/Lus10005559.g/scaffold274.9/Lus10039277.g/Lus10020506.g/Lus10020750.g/Lus10037469.g/Lus10036840.g/Lus10036837.g/Lus10012990.g/Lus10014437.g/Lus10034664.g/Lus10023056.g/Lus10007327.g/Lus10019833.g/Lus10006353.g/Lus10042261.g/Lus10013500.g/Lus10…	35
GO:0035556	BP	intracellular signal transduction	55/2242	573/32470	0.00862111	0.157712	0.144632	Lus10030229.g/Lus10011824.g/Lus10005618.g/Lus10039404.g/Lus10021190.g/Lus10040044.g/Lus10017252.g/scaffold244.27/scaffold1202.11/Lus10005619.g/Lus10024192.g/Lus10003460.g/Lus10036667.g/Lus10005990.g/Lus10021940.g/Lus10037032.g/Lus10014657.g/Lus10015773.g/Lus10029873.g/Lus10030221.g/Lus10040109.g/Lus10018594.g/Lus10030938.g/Lus10019615.g/Lus10005983.g/Lus10037940.g/Lus10027404.g/Lus10022265.g/Lus1…	55
GO:0060249	BP	anatomical structure homeostasis	9/2242	52/32470	0.00865427	0.157712	0.144632	Lus10005783.g/Lus10006818.g/Lus10010844.g/Lus10016644.g/Lus10011320.g/Lus10023406.g/Lus10025203.g/Lus10012092.g/Lus10015868.g	9
GO:0044765	BP	transport	110/2242	1272/32470	0.00869806	0.157712	0.144632	Lus10000310.g/Lus10015754.g/Lus10025152.g/scaffold51.48/Lus10015279.g/Lus10027367.g/Lus10011335.g/scaffold46.47/Lus10014932.g/Lus10008352.g/Lus10005239.g/Lus10002478.g/Lus10033814.g/Lus10003903.g/scaffold134.17/Lus10030683.g/Lus10003738.g/Lus10029668.g/Lus10025800.g/scaffold156.172/Lus10029966.g/Lus10010618.g/Lus10026946.g/Lus10008098.g/Lus10018992.g/Lus10007691.g/Lus10005685.g/Lus10007231.g/Lus1…	110
GO:1903825	BP	organic acid transmembrane transport	17/2242	131/32470	0.00885972	0.158897	0.145719	scaffold51.48/Lus10008352.g/Lus10005239.g/Lus10003903.g/Lus10030683.g/Lus10038639.g/Lus10001334.g/Lus10037544.g/Lus10018692.g/Lus10027321.g/Lus10042864.g/Lus10038640.g/Lus10001908.g/Lus10028165.g/Lus10012444.g/Lus10041482.g/Lus10039180.g	17
GO:1905039	BP	carboxylic acid transmembrane transport	17/2242	131/32470	0.00885972	0.158897	0.145719	scaffold51.48/Lus10008352.g/Lus10005239.g/Lus10003903.g/Lus10030683.g/Lus10038639.g/Lus10001334.g/Lus10037544.g/Lus10018692.g/Lus10027321.g/Lus10042864.g/Lus10038640.g/Lus10001908.g/Lus10028165.g/Lus10012444.g/Lus10041482.g/Lus10039180.g	17
GO:0098655	BP	cation transmembrane transport	30/2242	275/32470	0.00894827	0.159618	0.14638	Lus10035730.g/scaffold156.172/Lus10010618.g/Lus10026946.g/Lus10032154.g/Lus10033386.g/Lus10018324.g/Lus10042040.g/Lus10037544.g/Lus10009789.g/Lus10018692.g/Lus10034840.g/Lus10026944.g/Lus10010623.g/Lus10009819.g/Lus10033179.g/Lus10040925.g/Lus10033934.g/Lus10010619.g/Lus10003611.g/Lus10014531.g/Lus10004760.g/Lus10042445.g/Lus10003259.g/Lus10033382.g/Lus10018687.g/Lus10037904.g/Lus10018044.g/Lus10…	30
GO:0009838	BP	abscission	3/2242	7/32470	0.00931638	0.161811	0.148391	Lus10027404.g/Lus10038582.g/Lus10037882.g	3
GO:0015292	MF	uniporter activity	3/2242	7/32470	0.00931638	0.161811	0.148391	Lus10016799.g/Lus10019663.g/Lus10000580.g	3
GO:0016618	MF	hydroxypyruvate reductase activity	3/2242	7/32470	0.00931638	0.161811	0.148391	Lus10010803.g/Lus10016311.g/Lus10037552.g	3
GO:0030267	MF	glyoxylate reductase (NADP) activity	3/2242	7/32470	0.00931638	0.161811	0.148391	Lus10010803.g/Lus10016311.g/Lus10037552.g	3
GO:0071480	BP	cellular response to gamma radiation	3/2242	7/32470	0.00931638	0.161811	0.148391	Lus10005783.g/Lus10006818.g/Lus10015868.g	3
GO:1902578	BP	localization	113/2242	1315/32470	0.00947973	0.162168	0.148719	Lus10000310.g/Lus10015754.g/Lus10025152.g/scaffold51.48/Lus10015279.g/Lus10035730.g/Lus10027367.g/Lus10011335.g/scaffold46.47/Lus10014932.g/Lus10008352.g/Lus10005239.g/Lus10002478.g/Lus10033814.g/Lus10003903.g/scaffold134.17/Lus10030683.g/Lus10003738.g/Lus10029668.g/Lus10025800.g/scaffold156.172/Lus10029966.g/Lus10010618.g/Lus10026946.g/Lus10008098.g/Lus10018992.g/Lus10007691.g/Lus10005685.g/Lus1…	113
GO:0015144	MF	carbohydrate transmembrane transporter activity	23/2242	197/32470	0.0095261	0.162168	0.148719	Lus10000310.g/Lus10015754.g/Lus10040652.g/Lus10011335.g/Lus10014932.g/Lus10033814.g/Lus10025800.g/Lus10029966.g/Lus10007691.g/Lus10035354.g/Lus10011288.g/Lus10037895.g/Lus10029970.g/Lus10035281.g/Lus10032815.g/Lus10028303.g/Lus10041748.g/Lus10003143.g/Lus10029962.g/Lus10018956.g/Lus10002783.g/Lus10040482.g/Lus10005870.g	23
GO:0048037	MF	cofactor binding	79/2242	877/32470	0.0095295	0.162168	0.148719	Lus10032078.g/Lus10003845.g/Lus10017934.g/Lus10022137.g/Lus10014614.g/Lus10024568.g/Lus10034963.g/Lus10039861.g/Lus10038507.g/Lus10026471.g/Lus10033661.g/Lus10003780.g/C8303341.1/Lus10041031.g/Lus10007754.g/Lus10007021.g/Lus10019967.g/Lus10020908.g/Lus10009009.g/Lus10024289.g/Lus10003877.g/Lus10032854.g/Lus10029955.g/Lus10013676.g/Lus10011093.g/Lus10011345.g/Lus10025485.g/Lus10022903.g/Lus1001869…	79
GO:0015238	MF	drug transmembrane transporter activity	17/2242	132/32470	0.00953351	0.162168	0.148719	Lus10027367.g/scaffold134.17/Lus10029668.g/Lus10005685.g/Lus10007231.g/Lus10006171.g/Lus10012741.g/Lus10013626.g/Lus10026303.g/Lus10037544.g/Lus10020307.g/Lus10028540.g/Lus10002645.g/Lus10015903.g/Lus10023943.g/Lus10042365.g/Lus10042344.g	17
GO:0009739	BP	response to gibberellin	8/2242	44/32470	0.00967627	0.162457	0.148984	Lus10027969.g/Lus10005652.g/Lus10002900.g/Lus10021098.g/Lus10002028.g/Lus10009717.g/Lus10021827.g/Lus10022418.g	8
GO:0010332	BP	response to gamma radiation	4/2242	13/32470	0.00978081	0.162457	0.148984	Lus10005783.g/Lus10006818.g/Lus10004462.g/Lus10015868.g	4
GO:0050590	MF	desacetoxyvindoline 4-hydroxylase activity	4/2242	13/32470	0.00978081	0.162457	0.148984	Lus10007818.g/Lus10001109.g/Lus10022192.g/Lus10022191.g	4
GO:0051139	MF	metal ion:proton antiporter activity	4/2242	13/32470	0.00978081	0.162457	0.148984	Lus10004819.g/Lus10035507.g/Lus10040674.g/Lus10002490.g	4
GO:0016791	MF	phosphatase activity	52/2242	540/32470	0.00981269	0.162457	0.148984	Lus10001832.g/Lus10034965.g/Lus10012962.g/Lus10009210.g/Lus10040738.g/Lus10019017.g/Lus10003399.g/Lus10006485.g/Lus10004703.g/Lus10016493.g/Lus10019625.g/Lus10040270.g/Lus10037080.g/Lus10002500.g/Lus10032820.g/Lus10021940.g/Lus10005559.g/Lus10024179.g/Lus10004596.g/Lus10037019.g/Lus10005405.g/Lus10038058.g/Lus10005218.g/scaffold80.16/scaffold196.293/Lus10012990.g/Lus10041861.g/Lus10026908.g/Lus10…	52
GO:0009628	BP	response to abiotic stimulus	60/2242	639/32470	0.00984589	0.162457	0.148984	Lus10000310.g/Lus10015754.g/Lus10005134.g/Lus10013155.g/scaffold370.2/Lus10011335.g/Lus10005652.g/Lus10029759.g/Lus10024614.g/Lus10032252.g/Lus10014280.g/Lus10002733.g/Lus10005106.g/Lus10010140.g/Lus10005783.g/Lus10017223.g/Lus10000659.g/Lus10008652.g/Lus10006369.g/Lus10021240.g/Lus10028001.g/Lus10002900.g/Lus10035472.g/Lus10034595.g/Lus10037819.g/Lus10031826.g/Lus10037032.g/Lus10017977.g/Lus1003…	60
GO:1901476	MF	carbohydrate transmembrane transporter activity	23/2242	198/32470	0.0100942	0.164952	0.151272	Lus10000310.g/Lus10015754.g/Lus10040652.g/Lus10011335.g/Lus10014932.g/Lus10033814.g/Lus10025800.g/Lus10029966.g/Lus10007691.g/Lus10035354.g/Lus10011288.g/Lus10037895.g/Lus10029970.g/Lus10035281.g/Lus10032815.g/Lus10028303.g/Lus10041748.g/Lus10003143.g/Lus10029962.g/Lus10018956.g/Lus10002783.g/Lus10040482.g/Lus10005870.g	23
GO:0010224	BP	response to UV-B	5/2242	20/32470	0.010097	0.164952	0.151272	Lus10002900.g/Lus10002028.g/Lus10037584.g/Lus10004462.g/Lus10041508.g	5
GO:0006885	BP	regulation of pH	12/2242	82/32470	0.0104104	0.168404	0.154437	Lus10026946.g/Lus10026944.g/Lus10010623.g/Lus10039131.g/Lus10005934.g/Lus10033179.g/Lus10015268.g/Lus10010619.g/Lus10018989.g/Lus10042445.g/Lus10003259.g/Lus10033840.g	12
GO:0031347	BP	regulation of defense response	12/2242	82/32470	0.0104104	0.168404	0.154437	scaffold732.45/Lus10021940.g/Lus10011929.g/Lus10030599.g/Lus10039911.g/Lus10023302.g/Lus10030597.g/Lus10030891.g/Lus10027639.g/Lus10008129.g/Lus10013166.g/Lus10027648.g	12
GO:0009908	BP	flower development	22/2242	188/32470	0.0107651	0.173292	0.15892	Lus10030446.g/scaffold272.125/Lus10027969.g/Lus10005106.g/Lus10017223.g/Lus10002500.g/Lus10026617.g/Lus10037032.g/Lus10004646.g/Lus10041348.g/Lus10041794.g/Lus10000639.g/Lus10027404.g/Lus10023694.g/Lus10037370.g/Lus10007459.g/Lus10038582.g/Lus10043200.g/Lus10019636.g/Lus10037882.g/Lus10037156.g/Lus10000285.g	22
GO:0090484	MF	drug transmembrane transporter activity	17/2242	134/32470	0.0110032	0.176266	0.161647	Lus10027367.g/scaffold134.17/Lus10029668.g/Lus10005685.g/Lus10007231.g/Lus10006171.g/Lus10012741.g/Lus10013626.g/Lus10026303.g/Lus10037544.g/Lus10020307.g/Lus10028540.g/Lus10002645.g/Lus10015903.g/Lus10023943.g/Lus10042365.g/Lus10042344.g	17
GO:0015491	MF	cation:cation antiporter activity	9/2242	54/32470	0.0110591	0.176305	0.161683	Lus10004819.g/Lus10035507.g/Lus10040674.g/Lus10039131.g/Lus10002490.g/Lus10005934.g/Lus10015268.g/Lus10018989.g/Lus10033840.g	9
GO:0048367	BP	shoot system development	37/2242	362/32470	0.0111989	0.177556	0.162831	Lus10000310.g/Lus10015754.g/Lus10030446.g/scaffold272.125/Lus10027969.g/Lus10011335.g/Lus10005106.g/Lus10008098.g/Lus10017223.g/Lus10022225.g/Lus10002500.g/Lus10029876.g/Lus10026617.g/Lus10007849.g/Lus10037032.g/Lus10024927.g/Lus10004646.g/scaffold33.133/Lus10041348.g/Lus10022636.g/Lus10004759.g/Lus10041794.g/Lus10000639.g/Lus10027404.g/Lus10034253.g/Lus10023694.g/Lus10037370.g/Lus10041721.g/Lus1…	37
GO:0055065	BP	metal ion homeostasis	18/2242	145/32470	0.0112452	0.177556	0.162831	Lus10035730.g/Lus10039419.g/Lus10030514.g/Lus10016487.g/Lus10007231.g/Lus10040965.g/Lus10042946.g/Lus10002865.g/Lus10017730.g/Lus10040744.g/Lus10005934.g/Lus10004465.g/Lus10009598.g/Lus10018989.g/Lus10002674.g/scaffold43.7/Lus10033840.g/Lus10039073.g	18
GO:0051213	MF	dioxygenase activity	28/2242	257/32470	0.0114394	0.179762	0.164853	Lus10007818.g/Lus10028135.g/Lus10022190.g/Lus10021025.g/Lus10026185.g/Lus10042481.g/Lus10042839.g/Lus10016659.g/Lus10001109.g/Lus10005774.g/Lus10029820.g/Lus10032574.g/Lus10006759.g/Lus10032689.g/Lus10021902.g/Lus10042482.g/Lus10004387.g/Lus10022193.g/Lus10008571.g/Lus10020740.g/Lus10023851.g/Lus10022192.g/Lus10027585.g/Lus10031809.g/Lus10031236.g/Lus10022191.g/Lus10017249.g/Lus10000711.g	28
GO:0016702	MF	oxidoreductase activity, acting on single donors with incorporation of molecular oxygen, incorporation of two atoms of oxygen	10/2242	64/32470	0.0119142	0.184469	0.16917	Lus10028135.g/Lus10026185.g/Lus10042481.g/Lus10042839.g/Lus10029820.g/Lus10021902.g/Lus10042482.g/Lus10020740.g/Lus10031809.g/Lus10031236.g	10
GO:0000794	CC	condensed nuclear chromosome	7/2242	37/32470	0.0122114	0.184469	0.16917	Lus10034734.g/Lus10041143.g/Lus10010242.g/Lus10025814.g/Lus10033274.g/Lus10016644.g/Lus10036517.g	7
GO:0007062	BP	sister chromatid cohesion	5/2242	21/32470	0.0125127	0.184469	0.16917	Lus10007582.g/Lus10012164.g/Lus10026277.g/Lus10042396.g/Lus10029476.g	5
GO:0016157	MF	sucrose synthase activity	5/2242	21/32470	0.0125127	0.184469	0.16917	Lus10010308.g/Lus10013417.g/Lus10001468.g/Lus10020506.g/Lus10007372.g	5
GO:0004435	MF	phosphatidylinositol phospholipase C activity	4/2242	14/32470	0.0129552	0.184469	0.16917	scaffold87.43/Lus10042540.g/Lus10009894.g/Lus10040664.g	4
GO:0000793	CC	condensed chromosome	10/2242	65/32470	0.0132332	0.184469	0.16917	Lus10034734.g/Lus10041143.g/Lus10010242.g/Lus10025814.g/Lus10023694.g/Lus10027219.g/Lus10033274.g/Lus10016644.g/Lus10036517.g/Lus10029476.g	10
GO:0044242	BP	cellular lipid catabolic process	10/2242	65/32470	0.0132332	0.184469	0.16917	Lus10020908.g/Lus10011345.g/Lus10035175.g/Lus10012556.g/Lus10024038.g/Lus10020672.g/Lus10012306.g/Lus10003129.g/Lus10002582.g/Lus10011337.g	10
GO:0001053	MF	sigma factor activity	2/2242	3/32470	0.0136395	0.184469	0.16917	Lus10038823.g/Lus10014934.g	2
GO:0001527	CC	microfibril	2/2242	3/32470	0.0136395	0.184469	0.16917	Lus10020319.g/Lus10005672.g	2
GO:0002084	BP	protein depalmitoylation	2/2242	3/32470	0.0136395	0.184469	0.16917	Lus10026054.g/Lus10014347.g	2
GO:0004631	MF	phosphomevalonate kinase activity	2/2242	3/32470	0.0136395	0.184469	0.16917	Lus10010422.g/Lus10012122.g	2
GO:0006654	BP	phosphatidic acid biosynthetic process	2/2242	3/32470	0.0136395	0.184469	0.16917	Lus10029873.g/Lus10020672.g	2
GO:0008083	MF	growth factor activity	2/2242	3/32470	0.0136395	0.184469	0.16917	Lus10027716.g/Lus10011721.g	2
GO:0008474	MF	palmitoyl-(protein) hydrolase activity	2/2242	3/32470	0.0136395	0.184469	0.16917	Lus10026054.g/Lus10014347.g	2
GO:0008863	MF	formate dehydrogenase (NAD+) activity	2/2242	3/32470	0.0136395	0.184469	0.16917	C8303341.1/Lus10032150.g	2
GO:0015680	BP	protein maturation by copper ion transfer	2/2242	3/32470	0.0136395	0.184469	0.16917	Lus10009819.g/Lus10040925.g	2
GO:0015942	BP	formate metabolic process	2/2242	3/32470	0.0136395	0.184469	0.16917	C8303341.1/Lus10032150.g	2
GO:0016477	BP	cell migration	2/2242	3/32470	0.0136395	0.184469	0.16917	Lus10029873.g/Lus10020672.g	2
GO:0030334	BP	regulation of cell migration	2/2242	3/32470	0.0136395	0.184469	0.16917	Lus10029873.g/Lus10020672.g	2
GO:0040012	BP	regulation of locomotion	2/2242	3/32470	0.0136395	0.184469	0.16917	Lus10029873.g/Lus10020672.g	2
GO:0042159	BP	lipoprotein catabolic process	2/2242	3/32470	0.0136395	0.184469	0.16917	Lus10026054.g/Lus10014347.g	2
GO:0042183	BP	formate catabolic process	2/2242	3/32470	0.0136395	0.184469	0.16917	C8303341.1/Lus10032150.g	2
GO:0042754	BP	negative regulation of circadian rhythm	2/2242	3/32470	0.0136395	0.184469	0.16917	Lus10005134.g/scaffold370.2	2
GO:0043393	BP	regulation of protein binding	2/2242	3/32470	0.0136395	0.184469	0.16917	Lus10005134.g/scaffold370.2	2
GO:0043496	BP	regulation of protein homodimerization activity	2/2242	3/32470	0.0136395	0.184469	0.16917	Lus10005134.g/scaffold370.2	2
GO:0044420	CC	extracellular matrix component	2/2242	3/32470	0.0136395	0.184469	0.16917	Lus10020319.g/Lus10005672.g	2
GO:0046473	BP	phosphatidic acid metabolic process	2/2242	3/32470	0.0136395	0.184469	0.16917	Lus10029873.g/Lus10020672.g	2
GO:0048870	BP	cell motility	2/2242	3/32470	0.0136395	0.184469	0.16917	Lus10029873.g/Lus10020672.g	2
GO:0050764	BP	regulation of phagocytosis	2/2242	3/32470	0.0136395	0.184469	0.16917	Lus10029873.g/Lus10020672.g	2
GO:0051098	BP	regulation of binding	2/2242	3/32470	0.0136395	0.184469	0.16917	Lus10005134.g/scaffold370.2	2
GO:0051270	BP	regulation of cellular component movement	2/2242	3/32470	0.0136395	0.184469	0.16917	Lus10029873.g/Lus10020672.g	2
GO:0051674	BP	localization of cell	2/2242	3/32470	0.0136395	0.184469	0.16917	Lus10029873.g/Lus10020672.g	2
GO:0098734	BP	macromolecule depalmitoylation	2/2242	3/32470	0.0136395	0.184469	0.16917	Lus10026054.g/Lus10014347.g	2
GO:2000145	BP	regulation of cell motility	2/2242	3/32470	0.0136395	0.184469	0.16917	Lus10029873.g/Lus10020672.g	2
GO:0009867	BP	jasmonic acid mediated signaling pathway	7/2242	38/32470	0.0140987	0.185991	0.170566	scaffold732.45/Lus10011929.g/Lus10039911.g/Lus10027639.g/Lus10008129.g/Lus10013166.g/Lus10027648.g	7
GO:0071395	BP	cellular response to jasmonic acid stimulus	7/2242	38/32470	0.0140987	0.185991	0.170566	scaffold732.45/Lus10011929.g/Lus10039911.g/Lus10027639.g/Lus10008129.g/Lus10013166.g/Lus10027648.g	7
GO:0003844	MF	1,4-alpha-glucan branching enzyme activity	3/2242	8/32470	0.0141466	0.185991	0.170566	Lus10027725.g/Lus10012264.g/Lus10016012.g	3
GO:0004022	MF	alcohol dehydrogenase (NAD) activity	3/2242	8/32470	0.0141466	0.185991	0.170566	Lus10029759.g/Lus10007490.g/Lus10016354.g	3
GO:0004478	MF	methionine adenosyltransferase activity	3/2242	8/32470	0.0141466	0.185991	0.170566	Lus10026541.g/Lus10009985.g/Lus10038044.g	3
GO:0006556	BP	S-adenosylmethionine biosynthetic process	3/2242	8/32470	0.0141466	0.185991	0.170566	Lus10026541.g/Lus10009985.g/Lus10038044.g	3
GO:0071139	BP	resolution of recombination intermediates	3/2242	8/32470	0.0141466	0.185991	0.170566	Lus10023694.g/Lus10027219.g/Lus10029476.g	3
GO:0006952	BP	defense response	59/2242	640/32470	0.0147619	0.193311	0.177278	Lus10003660.g/scaffold732.45/Lus10035832.g/Lus10004289.g/Lus10007633.g/Lus10003398.g/Lus10003265.g/Lus10021940.g/Lus10011929.g/Lus10006746.g/Lus10030599.g/Lus10032602.g/Lus10041348.g/Lus10039911.g/Lus10022265.g/Lus10023302.g/Lus10006793.g/Lus10032759.g/Lus10001137.g/Lus10005218.g/Lus10029123.g/Lus10037370.g/scaffold225.31/Lus10030597.g/Lus10020051.g/Lus10027477.g/Lus10033432.g/Lus10028639.g/Lus10…	59
GO:0008515	MF	sucrose transmembrane transporter activity	5/2242	22/32470	0.0152911	0.199449	0.182908	Lus10000310.g/Lus10015754.g/Lus10011335.g/Lus10007691.g/Lus10032815.g	5
GO:0005984	BP	disaccharide metabolic process	10/2242	67/32470	0.0161958	0.209593	0.19221	Lus10004340.g/Lus10010308.g/Lus10013417.g/Lus10001468.g/Lus10005559.g/Lus10028922.g/Lus10020506.g/Lus10012990.g/Lus10021805.g/Lus10007372.g	10
GO:0015662	MF	ATPase activity, coupled to transmembrane movement of ions, phosphorylative mechanism	10/2242	67/32470	0.0161958	0.209593	0.19221	Lus10026946.g/Lus10033386.g/Lus10042040.g/Lus10009789.g/Lus10034840.g/Lus10026944.g/Lus10042445.g/Lus10003259.g/Lus10018687.g/Lus10018044.g	10
GO:0055067	BP	monovalent inorganic cation homeostasis	12/2242	87/32470	0.0162696	0.209725	0.192332	Lus10026946.g/Lus10026944.g/Lus10010623.g/Lus10039131.g/Lus10005934.g/Lus10033179.g/Lus10015268.g/Lus10010619.g/Lus10018989.g/Lus10042445.g/Lus10003259.g/Lus10033840.g	12
GO:0019842	MF	vitamin binding	27/2242	253/32470	0.0164494	0.210399	0.19295	Lus10017934.g/Lus10022137.g/Lus10039861.g/Lus10033661.g/Lus10007754.g/Lus10007021.g/Lus10029955.g/Lus10013676.g/Lus10011345.g/Lus10018692.g/scaffold464.140/Lus10014765.g/Lus10017705.g/Lus10017333.g/Lus10003810.g/Lus10017704.g/Lus10011101.g/Lus10015947.g/Lus10003129.g/Lus10023299.g/Lus10031048.g/Lus10038510.g/Lus10042923.g/Lus10004118.g/Lus10009086.g/Lus10018986.g/Lus10017249.g	27
GO:0098660	BP	inorganic ion transmembrane transport	27/2242	253/32470	0.0164494	0.210399	0.19295	Lus10035730.g/scaffold156.172/Lus10010618.g/Lus10026946.g/Lus10032154.g/Lus10033386.g/Lus10018324.g/Lus10042040.g/Lus10009789.g/Lus10034840.g/Lus10026944.g/Lus10010623.g/Lus10009819.g/Lus10033179.g/Lus10040925.g/Lus10033934.g/Lus10010619.g/Lus10003611.g/Lus10014531.g/Lus10042445.g/Lus10003259.g/Lus10033382.g/Lus10018687.g/Lus10037904.g/Lus10018044.g/Lus10024107.g/Lus10031872.g	27
GO:0007064	BP	mitotic sister chromatid cohesion	4/2242	15/32470	0.0167167	0.212993	0.195328	Lus10007582.g/Lus10012164.g/Lus10026277.g/Lus10042396.g	4
GO:0003691	MF	double-stranded telomeric DNA binding	6/2242	31/32470	0.0177843	0.223822	0.205259	Lus10010844.g/Lus10016644.g/Lus10011320.g/Lus10023406.g/Lus10025203.g/Lus10012092.g	6
GO:0004029	MF	aldehyde dehydrogenase (NAD) activity	6/2242	31/32470	0.0177843	0.223822	0.205259	Lus10013155.g/Lus10008117.g/Lus10004264.g/Lus10042174.g/Lus10042724.g/Lus10029684.g	6
GO:0009411	BP	response to UV	6/2242	31/32470	0.0177843	0.223822	0.205259	Lus10002900.g/Lus10002028.g/Lus10037584.g/Lus10017724.g/Lus10004462.g/Lus10041508.g	6
GO:1901605	BP	alpha-amino acid metabolic process	38/2242	386/32470	0.0178379	0.223822	0.205259	Lus10004697.g/Lus10014407.g/Lus10040264.g/Lus10014658.g/Lus10028135.g/Lus10001018.g/Lus10001016.g/Lus10008521.g/C8303341.1/Lus10004696.g/Lus10042839.g/Lus10040263.g/Lus10001019.g/Lus10029955.g/Lus10037544.g/scaffold464.140/Lus10014765.g/Lus10040262.g/Lus10034095.g/Lus10030158.g/Lus10034094.g/Lus10012536.g/Lus10021902.g/Lus10019103.g/Lus10033793.g/Lus10010505.g/Lus10015947.g/Lus10032150.g/Lus10019…	38
GO:0019139	MF	cytokinin dehydrogenase activity	5/2242	23/32470	0.0184528	0.229789	0.210732	Lus10003845.g/Lus10026471.g/Lus10024289.g/scaffold380.27/Lus10018038.g	5
GO:1900140	BP	regulation of seedling development	5/2242	23/32470	0.0184528	0.229789	0.210732	Lus10021369.g/Lus10000659.g/Lus10028001.g/Lus10017049.g/Lus10027477.g	5
GO:0046943	MF	carboxylic acid transmembrane transporter activity	19/2242	164/32470	0.0186009	0.230763	0.211625	scaffold51.48/Lus10008352.g/Lus10005239.g/Lus10003903.g/Lus10030683.g/Lus10003738.g/Lus10038639.g/Lus10001334.g/Lus10037544.g/Lus10018692.g/Lus10004430.g/Lus10027321.g/Lus10042864.g/Lus10038640.g/Lus10001908.g/Lus10028165.g/Lus10012444.g/Lus10041482.g/Lus10039180.g	19
GO:0006629	BP	lipid metabolic process	98/2242	1152/32470	0.0190078	0.234927	0.215444	scaffold272.125/Lus10016083.g/Lus10009679.g/Lus10034483.g/Lus10039278.g/Lus10007877.g/Lus10009041.g/Lus10002191.g/Lus10008951.g/Lus10028572.g/Lus10017165.g/Lus10000692.g/Lus10000572.g/Lus10040665.g/Lus10020908.g/Lus10006058.g/Lus10018239.g/Lus10033706.g/Lus10026853.g/Lus10027515.g/Lus10036526.g/Lus10019671.g/Lus10024927.g/Lus10031634.g/Lus10011345.g/Lus10029873.g/Lus10014075.g/Lus10041402.g/Lus10…	98
GO:0046916	BP	cellular transition metal ion homeostasis	14/2242	110/32470	0.0192858	0.23655	0.216932	Lus10035730.g/Lus10039419.g/Lus10030514.g/Lus10016487.g/Lus10040965.g/Lus10042946.g/Lus10002865.g/Lus10017730.g/Lus10040744.g/Lus10004465.g/Lus10009598.g/Lus10002674.g/scaffold43.7/Lus10039073.g	14
GO:0010604	BP	positive regulation of macromolecule metabolic process	25/2242	234/32470	0.0201193	0.23655	0.216932	Lus10005134.g/Lus10010733.g/scaffold370.2/Lus10021369.g/Lus10029051.g/Lus10017049.g/Lus10022225.g/Lus10036678.g/Lus10038823.g/Lus10014934.g/Lus10027404.g/Lus10022265.g/Lus10001137.g/Lus10003119.g/Lus10035332.g/Lus10030422.g/Lus10024093.g/Lus10003810.g/Lus10026637.g/Lus10018061.g/Lus10023619.g/Lus10026104.g/Lus10041126.g/Lus10007022.g/Lus10017289.g	25
GO:0004061	MF	arylformamidase activity	3/2242	9/32470	0.0201426	0.23655	0.216932	Lus10019822.g/Lus10014091.g/Lus10014092.g	3
GO:0004345	MF	glucose-6-phosphate dehydrogenase activity	3/2242	9/32470	0.0201426	0.23655	0.216932	Lus10032078.g/Lus10014614.g/Lus10032079.g	3
GO:0006569	BP	tryptophan catabolic process	3/2242	9/32470	0.0201426	0.23655	0.216932	Lus10019822.g/Lus10014091.g/Lus10014092.g	3
GO:0006597	BP	spermine biosynthetic process	3/2242	9/32470	0.0201426	0.23655	0.216932	Lus10003398.g/Lus10040973.g/Lus10035083.g	3
GO:0008215	BP	spermine metabolic process	3/2242	9/32470	0.0201426	0.23655	0.216932	Lus10003398.g/Lus10040973.g/Lus10035083.g	3
GO:0008756	MF	o-succinylbenzoate-CoA ligase activity	3/2242	9/32470	0.0201426	0.23655	0.216932	Lus10037735.g/Lus10016870.g/Lus10016869.g	3
GO:0019441	BP	tryptophan catabolic process to kynurenine	3/2242	9/32470	0.0201426	0.23655	0.216932	Lus10019822.g/Lus10014091.g/Lus10014092.g	3
GO:0035250	MF	UDP-galactosyltransferase activity	3/2242	9/32470	0.0201426	0.23655	0.216932	Lus10010897.g/Lus10012822.g/Lus10031434.g	3
GO:0042436	BP	indole-containing compound catabolic process	3/2242	9/32470	0.0201426	0.23655	0.216932	Lus10019822.g/Lus10014091.g/Lus10014092.g	3
GO:0046218	BP	indolalkylamine catabolic process	3/2242	9/32470	0.0201426	0.23655	0.216932	Lus10019822.g/Lus10014091.g/Lus10014092.g	3
GO:0070189	BP	kynurenine metabolic process	3/2242	9/32470	0.0201426	0.23655	0.216932	Lus10019822.g/Lus10014091.g/Lus10014092.g	3
GO:0071479	BP	cellular response to ionizing radiation	3/2242	9/32470	0.0201426	0.23655	0.216932	Lus10005783.g/Lus10006818.g/Lus10015868.g	3
GO:0006470	BP	protein dephosphorylation	23/2242	211/32470	0.0202788	0.237305	0.217624	Lus10001832.g/Lus10034965.g/Lus10012962.g/Lus10009210.g/Lus10040738.g/Lus10019017.g/Lus10003399.g/Lus10006485.g/Lus10004703.g/Lus10016493.g/Lus10040270.g/Lus10021940.g/Lus10005405.g/Lus10038058.g/scaffold196.293/Lus10041861.g/Lus10026908.g/Lus10001976.g/Lus10034062.g/Lus10020671.g/Lus10009993.g/Lus10037832.g/Lus10036689.g	23
GO:0009893	BP	positive regulation of metabolic process	27/2242	258/32470	0.0206732	0.237582	0.217878	Lus10005134.g/Lus10010733.g/scaffold370.2/Lus10021369.g/Lus10029051.g/Lus10017049.g/Lus10002900.g/Lus10022225.g/Lus10036678.g/Lus10038823.g/Lus10014934.g/Lus10027404.g/Lus10022265.g/Lus10001137.g/Lus10002028.g/Lus10003119.g/Lus10035332.g/Lus10030422.g/Lus10024093.g/Lus10003810.g/Lus10026637.g/Lus10018061.g/Lus10023619.g/Lus10026104.g/Lus10041126.g/Lus10007022.g/Lus10017289.g	27
GO:0016298	MF	lipase activity	14/2242	111/32470	0.0207137	0.237582	0.217878	Lus10009679.g/Lus10007877.g/Lus10009041.g/Lus10000572.g/Lus10033706.g/Lus10031634.g/Lus10029873.g/scaffold87.43/Lus10020672.g/Lus10022349.g/Lus10009169.g/Lus10042540.g/Lus10009894.g/Lus10040664.g	14
GO:0098687	CC	chromosomal region	12/2242	90/32470	0.0208136	0.237582	0.217878	Lus10005783.g/Lus10006818.g/Lus10010844.g/Lus10025814.g/Lus10011470.g/Lus10023105.g/Lus10016644.g/Lus10011320.g/Lus10023406.g/Lus10025203.g/Lus10012092.g/Lus10015868.g	12
GO:0009640	BP	photomorphogenesis	7/2242	41/32470	0.0209969	0.237582	0.217878	Lus10017223.g/Lus10006369.g/Lus10002900.g/Lus10035472.g/Lus10002028.g/Lus10035332.g/Lus10031087.g	7
GO:0055076	BP	transition metal ion homeostasis	15/2242	122/32470	0.0210694	0.237582	0.217878	Lus10035730.g/Lus10039419.g/Lus10030514.g/Lus10016487.g/Lus10007231.g/Lus10040965.g/Lus10042946.g/Lus10002865.g/Lus10017730.g/Lus10040744.g/Lus10004465.g/Lus10009598.g/Lus10002674.g/scaffold43.7/Lus10039073.g	15
GO:0000165	BP	MAPK cascade	4/2242	16/32470	0.0210944	0.237582	0.217878	Lus10021940.g/Lus10027404.g/Lus10022265.g/Lus10001137.g	4
GO:0023014	BP	signal transduction by protein phosphorylation	4/2242	16/32470	0.0210944	0.237582	0.217878	Lus10021940.g/Lus10027404.g/Lus10022265.g/Lus10001137.g	4
GO:0032119	BP	sequestering of zinc ion	4/2242	16/32470	0.0210944	0.237582	0.217878	Lus10016487.g/Lus10040744.g/Lus10009598.g/Lus10002674.g	4
GO:0051184	MF	cofactor transmembrane transporter activity	4/2242	16/32470	0.0210944	0.237582	0.217878	Lus10028810.g/Lus10038681.g/Lus10037947.g/Lus10008572.g	4
GO:0061088	BP	regulation of sequestering of zinc ion	4/2242	16/32470	0.0210944	0.237582	0.217878	Lus10016487.g/Lus10040744.g/Lus10009598.g/Lus10002674.g	4
GO:2000021	BP	ion homeostasis	4/2242	16/32470	0.0210944	0.237582	0.217878	Lus10016487.g/Lus10040744.g/Lus10009598.g/Lus10002674.g	4
GO:0009931	MF	calcium-dependent protein serine/threonine kinase activity	9/2242	60/32470	0.0212766	0.238009	0.21827	Lus10011824.g/Lus10021190.g/scaffold1202.11/Lus10005619.g/Lus10036667.g/Lus10014657.g/Lus10017251.g/Lus10041093.g/Lus10015009.g	9
GO:0010857	MF	calcium-dependent protein kinase activity	9/2242	60/32470	0.0212766	0.238009	0.21827	Lus10011824.g/Lus10021190.g/scaffold1202.11/Lus10005619.g/Lus10036667.g/Lus10014657.g/Lus10017251.g/Lus10041093.g/Lus10015009.g	9
GO:0008889	MF	glycerophosphodiester phosphodiesterase activity	5/2242	24/32470	0.0220162	0.242988	0.222836	Lus10035175.g/Lus10012556.g/Lus10002582.g/Lus10043171.g/Lus10011337.g	5
GO:0015766	BP	disaccharide transport	5/2242	24/32470	0.0220162	0.242988	0.222836	Lus10000310.g/Lus10015754.g/Lus10011335.g/Lus10007691.g/Lus10032815.g	5
GO:0015770	BP	sucrose transport	5/2242	24/32470	0.0220162	0.242988	0.222836	Lus10000310.g/Lus10015754.g/Lus10011335.g/Lus10007691.g/Lus10032815.g	5
GO:0015772	BP	oligosaccharide transport	5/2242	24/32470	0.0220162	0.242988	0.222836	Lus10000310.g/Lus10015754.g/Lus10011335.g/Lus10007691.g/Lus10032815.g	5
GO:0006820	BP	anion transport	37/2242	380/32470	0.0223279	0.245607	0.225237	Lus10000673.g/scaffold51.48/Lus10027211.g/Lus10008352.g/Lus10005239.g/Lus10024614.g/Lus10003903.g/Lus10038148.g/Lus10030683.g/Lus10032252.g/Lus10003738.g/Lus10038923.g/Lus10038639.g/Lus10029605.g/Lus10033886.g/Lus10001334.g/Lus10003560.g/Lus10037544.g/Lus10018692.g/Lus10011826.g/Lus10027321.g/scaffold115.10/Lus10004153.g/Lus10027210.g/scaffold610.41/Lus10042864.g/Lus10038640.g/Lus10001908.g/Lus10…	37
GO:0048366	BP	leaf development	18/2242	157/32470	0.0236809	0.259624	0.238092	Lus10000310.g/Lus10015754.g/Lus10030446.g/scaffold272.125/Lus10011335.g/Lus10022225.g/Lus10026617.g/Lus10037032.g/Lus10024927.g/Lus10022636.g/Lus10041794.g/Lus10000639.g/Lus10027404.g/Lus10023694.g/Lus10043200.g/Lus10012657.g/Lus10037156.g/Lus10000285.g	18
GO:0048608	BP	reproductive structure development	44/2242	469/32470	0.0244073	0.260968	0.239325	Lus10030446.g/Lus10016056.g/scaffold272.125/Lus10027969.g/Lus10021369.g/Lus10041310.g/Lus10020719.g/Lus10005106.g/Lus10017223.g/Lus10000659.g/Lus10028001.g/Lus10017049.g/Lus10035472.g/Lus10002500.g/Lus10031826.g/Lus10029876.g/Lus10026617.g/Lus10037032.g/Lus10022060.g/Lus10035662.g/Lus10004646.g/Lus10041348.g/Lus10022636.g/Lus10041794.g/Lus10000639.g/Lus10027404.g/Lus10004561.g/Lus10035332.g/Lus10…	44
GO:0061458	BP	reproductive system development	44/2242	469/32470	0.0244073	0.260968	0.239325	Lus10030446.g/Lus10016056.g/scaffold272.125/Lus10027969.g/Lus10021369.g/Lus10041310.g/Lus10020719.g/Lus10005106.g/Lus10017223.g/Lus10000659.g/Lus10028001.g/Lus10017049.g/Lus10035472.g/Lus10002500.g/Lus10031826.g/Lus10029876.g/Lus10026617.g/Lus10037032.g/Lus10022060.g/Lus10035662.g/Lus10004646.g/Lus10041348.g/Lus10022636.g/Lus10041794.g/Lus10000639.g/Lus10027404.g/Lus10004561.g/Lus10035332.g/Lus10…	44
GO:0009069	BP	serine family amino acid metabolic process	11/2242	82/32470	0.0251598	0.260968	0.239325	Lus10014658.g/C8303341.1/Lus10014765.g/Lus10015947.g/Lus10032150.g/Lus10015966.g/Lus10021156.g/Lus10042923.g/Lus10004118.g/Lus10005333.g/Lus10037334.g	11
GO:0042626	MF	ATPase activity, coupled to transmembrane movement of substances	33/2242	335/32470	0.025576	0.260968	0.239325	Lus10027725.g/Lus10015994.g/Lus10018027.g/Lus10028810.g/Lus10026946.g/Lus10012959.g/Lus10033386.g/Lus10024965.g/Lus10042040.g/Lus10015993.g/Lus10009789.g/Lus10022858.g/Lus10034840.g/Lus10027727.g/Lus10026944.g/Lus10038681.g/Lus10010623.g/Lus10037947.g/Lus10033637.g/Lus10033179.g/Lus10027567.g/Lus10033934.g/Lus10010619.g/Lus10034387.g/Lus10042445.g/Lus10011498.g/Lus10003259.g/Lus10039320.g/Lus1003…	33
GO:0016854	MF	racemase and epimerase activity	9/2242	62/32470	0.0258407	0.260968	0.239325	scaffold98.117/Lus10019967.g/Lus10038423.g/Lus10015715.g/Lus10030673.g/Lus10014492.g/Lus10001514.g/Lus10032391.g/Lus10023077.g	9
GO:0008194	MF	UDP-glycosyltransferase activity	46/2242	496/32470	0.0259883	0.260968	0.239325	Lus10032415.g/Lus10010308.g/Lus10024583.g/Lus10003454.g/Lus10005676.g/scaffold1247.34/Lus10013417.g/Lus10023057.g/Lus10028572.g/Lus10001468.g/Lus10042262.g/Lus10003455.g/Lus10005559.g/Lus10040447.g/scaffold274.9/Lus10039277.g/Lus10010897.g/Lus10020506.g/Lus10020316.g/Lus10020750.g/Lus10037469.g/Lus10036840.g/Lus10036837.g/Lus10009738.g/Lus10031819.g/Lus10012822.g/Lus10012990.g/Lus10014437.g/Lus10…	46
GO:0005388	MF	calcium-transporting ATPase activity	5/2242	25/32470	0.0259975	0.260968	0.239325	Lus10033386.g/Lus10042040.g/Lus10034840.g/Lus10018687.g/Lus10018044.g	5
GO:0010017	BP	red or far-red light signaling pathway	5/2242	25/32470	0.0259975	0.260968	0.239325	Lus10002900.g/Lus10037819.g/Lus10002028.g/Lus10007459.g/Lus10003810.g	5
GO:0071489	BP	cellular response to red or far red light	5/2242	25/32470	0.0259975	0.260968	0.239325	Lus10002900.g/Lus10037819.g/Lus10002028.g/Lus10007459.g/Lus10003810.g	5
GO:0005342	MF	organic acid transmembrane transporter activity	19/2242	170/32470	0.0260092	0.260968	0.239325	scaffold51.48/Lus10008352.g/Lus10005239.g/Lus10003903.g/Lus10030683.g/Lus10003738.g/Lus10038639.g/Lus10001334.g/Lus10037544.g/Lus10018692.g/Lus10004430.g/Lus10027321.g/Lus10042864.g/Lus10038640.g/Lus10001908.g/Lus10028165.g/Lus10012444.g/Lus10041482.g/Lus10039180.g	19
GO:0044282	BP	small molecule catabolic process	19/2242	170/32470	0.0260092	0.260968	0.239325	Lus10014658.g/Lus10028135.g/C8303341.1/Lus10020908.g/Lus10034595.g/Lus10042839.g/Lus10015715.g/Lus10006198.g/Lus10036993.g/Lus10034095.g/Lus10034094.g/Lus10024038.g/Lus10027477.g/Lus10012306.g/Lus10032150.g/Lus10019822.g/Lus10031877.g/Lus10014091.g/Lus10014092.g	19
GO:0000481	BP	maturation of 5S rRNA	2/2242	4/32470	0.0260319	0.260968	0.239325	Lus10000639.g/Lus10000285.g	2
GO:0006452	BP	translational frameshifting	2/2242	4/32470	0.0260319	0.260968	0.239325	Lus10030422.g/Lus10026637.g	2
GO:0006909	BP	phagocytosis	2/2242	4/32470	0.0260319	0.260968	0.239325	Lus10029873.g/Lus10020672.g	2
GO:0009854	BP	oxidative photosynthetic carbon pathway	2/2242	4/32470	0.0260319	0.260968	0.239325	Lus10023302.g/Lus10037552.g	2
GO:0010264	BP	myo-inositol hexakisphosphate biosynthetic process	2/2242	4/32470	0.0260319	0.260968	0.239325	Lus10018235.g/Lus10040669.g	2
GO:0016713	MF	oxidoreductase activity, acting on paired donors, with incorporation or reduction of molecular oxygen, reduced iron-sulfur protein as one donor, and incorporation of one atom of oxygen	2/2242	4/32470	0.0260319	0.260968	0.239325	Lus10032689.g/Lus10008571.g	2
GO:0033517	BP	myo-inositol hexakisphosphate metabolic process	2/2242	4/32470	0.0260319	0.260968	0.239325	Lus10018235.g/Lus10040669.g	2
GO:0043243	BP	positive regulation of protein complex disassembly	2/2242	4/32470	0.0260319	0.260968	0.239325	Lus10030422.g/Lus10026637.g	2
GO:0045901	BP	positive regulation of translational elongation	2/2242	4/32470	0.0260319	0.260968	0.239325	Lus10030422.g/Lus10026637.g	2
GO:0045905	BP	positive regulation of translational termination	2/2242	4/32470	0.0260319	0.260968	0.239325	Lus10030422.g/Lus10026637.g	2
GO:0046027	MF	phospholipid:diacylglycerol acyltransferase activity	2/2242	4/32470	0.0260319	0.260968	0.239325	Lus10017165.g/Lus10021564.g	2
GO:0046901	BP	tetrahydrofolylpolyglutamate biosynthetic process	2/2242	4/32470	0.0260319	0.260968	0.239325	Lus10004694.g/Lus10040261.g	2
GO:0050373	MF	UDP-arabinose 4-epimerase activity	2/2242	4/32470	0.0260319	0.260968	0.239325	scaffold98.117/Lus10038423.g	2
GO:0060919	BP	auxin influx	2/2242	4/32470	0.0260319	0.260968	0.239325	Lus10020193.g/Lus10026994.g	2
GO:0080124	MF	pheophytinase activity	2/2242	4/32470	0.0260319	0.260968	0.239325	Lus10016369.g/Lus10019755.g	2
GO:0004629	MF	phospholipase C activity	4/2242	17/32470	0.0261108	0.260968	0.239325	scaffold87.43/Lus10042540.g/Lus10009894.g/Lus10040664.g	4
GO:0009903	BP	chloroplast avoidance movement	4/2242	17/32470	0.0261108	0.260968	0.239325	Lus10016626.g/Lus10022531.g/Lus10017614.g/Lus10033572.g	4
GO:0008514	MF	organic anion transmembrane transporter activity	21/2242	193/32470	0.0261131	0.260968	0.239325	scaffold51.48/Lus10008352.g/Lus10005239.g/Lus10003903.g/Lus10030683.g/Lus10003738.g/Lus10038639.g/Lus10029605.g/Lus10001334.g/Lus10037544.g/Lus10018692.g/Lus10004430.g/Lus10027321.g/Lus10042864.g/Lus10038640.g/Lus10001908.g/Lus10028165.g/Lus10012444.g/Lus10041482.g/Lus10008572.g/Lus10039180.g	21
GO:0043492	MF	ATPase activity, coupled to movement of substances	35/2242	360/32470	0.0261759	0.260968	0.239325	Lus10027725.g/Lus10015994.g/Lus10018027.g/Lus10028810.g/Lus10026946.g/Lus10012959.g/Lus10033386.g/Lus10024965.g/Lus10042040.g/Lus10015993.g/Lus10009789.g/Lus10022858.g/Lus10034840.g/Lus10027727.g/Lus10026944.g/Lus10038681.g/Lus10010623.g/Lus10037947.g/Lus10033637.g/Lus10033179.g/Lus10027567.g/Lus10033934.g/Lus10010619.g/Lus10034387.g/Lus10042445.g/Lus10011498.g/Lus10003259.g/Lus10039320.g/Lus1003…	35
GO:0030641	BP	regulation of cellular pH	7/2242	43/32470	0.0267203	0.264003	0.242108	Lus10026946.g/Lus10026944.g/Lus10010623.g/Lus10033179.g/Lus10010619.g/Lus10042445.g/Lus10003259.g	7
GO:0051453	BP	regulation of intracellular pH	7/2242	43/32470	0.0267203	0.264003	0.242108	Lus10026946.g/Lus10026944.g/Lus10010623.g/Lus10033179.g/Lus10010619.g/Lus10042445.g/Lus10003259.g	7
GO:0071482	BP	cellular response to light stimulus	7/2242	43/32470	0.0267203	0.264003	0.242108	Lus10002900.g/Lus10037819.g/Lus10038823.g/Lus10002028.g/Lus10011777.g/Lus10007459.g/Lus10003810.g	7
GO:0019318	BP	hexose metabolic process	13/2242	104/32470	0.0268969	0.264954	0.24298	Lus10032078.g/scaffold98.117/Lus10014614.g/Lus10037789.g/Lus10034595.g/Lus10038423.g/Lus10010897.g/Lus10030673.g/Lus10031434.g/Lus10032079.g/Lus10016320.g/Lus10031877.g/Lus10009602.g	13
GO:0003860	MF	3-hydroxyisobutyryl-CoA hydrolase activity	3/2242	10/32470	0.0273201	0.265948	0.243892	Lus10043253.g/Lus10038717.g/Lus10007334.g	3
GO:0009310	BP	amine catabolic process	3/2242	10/32470	0.0273201	0.265948	0.243892	Lus10019822.g/Lus10014091.g/Lus10014092.g	3
GO:0042402	BP	cellular biogenic amine catabolic process	3/2242	10/32470	0.0273201	0.265948	0.243892	Lus10019822.g/Lus10014091.g/Lus10014092.g	3
GO:0043090	BP	amino acid import	3/2242	10/32470	0.0273201	0.265948	0.243892	Lus10003738.g/Lus10037544.g/Lus10018692.g	3
GO:0046527	MF	glucosyltransferase activity	39/2242	412/32470	0.0287704	0.279001	0.255862	Lus10032415.g/Lus10010308.g/Lus10024583.g/Lus10003454.g/scaffold1247.34/Lus10013417.g/Lus10023057.g/Lus10028572.g/Lus10030484.g/Lus10040665.g/Lus10018239.g/Lus10001468.g/Lus10042262.g/Lus10003455.g/Lus10037377.g/Lus10005559.g/scaffold274.9/Lus10039277.g/Lus10020506.g/Lus10020750.g/Lus10037469.g/Lus10036840.g/Lus10036837.g/Lus10012990.g/Lus10014437.g/Lus10034664.g/Lus10023056.g/Lus10007327.g/Lus10…	39
GO:0010558	BP	negative regulation of macromolecule biosynthetic process	21/2242	195/32470	0.0288301	0.279001	0.255862	Lus10005134.g/scaffold732.45/scaffold370.2/Lus10012202.g/Lus10008007.g/Lus10019348.g/Lus10007849.g/Lus10011929.g/Lus10009351.g/Lus10039911.g/Lus10004759.g/Lus10001012.g/Lus10043200.g/Lus10027639.g/Lus10008129.g/Lus10024485.g/Lus10021650.g/Lus10013166.g/Lus10027648.g/Lus10041718.g/Lus10043433.g	21
GO:0044723	BP	carbohydrate metabolic process	69/2242	795/32470	0.0300217	0.289683	0.265658	Lus10032078.g/Lus10004340.g/Lus10032415.g/Lus10010308.g/Lus10027725.g/Lus10024583.g/scaffold98.117/Lus10014614.g/Lus10012264.g/scaffold1247.34/Lus10041003.g/Lus10013417.g/Lus10039994.g/Lus10023057.g/Lus10023553.g/Lus10028572.g/Lus10000692.g/Lus10037789.g/Lus10034595.g/Lus10001468.g/Lus10038423.g/Lus10015715.g/Lus10042262.g/Lus10006198.g/Lus10019671.g/Lus10005559.g/scaffold274.9/Lus10028922.g/Lus1…	69
GO:0006814	BP	sodium ion transport	5/2242	26/32470	0.0304103	0.292578	0.268313	Lus10027321.g/Lus10039131.g/Lus10005934.g/Lus10018989.g/Lus10033840.g	5
GO:0016054	BP	organic acid catabolic process	14/2242	117/32470	0.0310025	0.296546	0.271952	Lus10014658.g/Lus10028135.g/C8303341.1/Lus10020908.g/Lus10042839.g/Lus10034095.g/Lus10034094.g/Lus10024038.g/Lus10027477.g/Lus10012306.g/Lus10032150.g/Lus10019822.g/Lus10014091.g/Lus10014092.g	14
GO:0046395	BP	carboxylic acid catabolic process	14/2242	117/32470	0.0310025	0.296546	0.271952	Lus10014658.g/Lus10028135.g/C8303341.1/Lus10020908.g/Lus10042839.g/Lus10034095.g/Lus10034094.g/Lus10024038.g/Lus10027477.g/Lus10012306.g/Lus10032150.g/Lus10019822.g/Lus10014091.g/Lus10014092.g	14
GO:0006882	BP	cellular zinc ion homeostasis	4/2242	18/32470	0.031782	0.298805	0.274024	Lus10016487.g/Lus10040744.g/Lus10009598.g/Lus10002674.g	4
GO:0010043	BP	response to zinc ion	4/2242	18/32470	0.031782	0.298805	0.274024	Lus10016487.g/Lus10040744.g/Lus10009598.g/Lus10002674.g	4
GO:0015081	MF	sodium ion transmembrane transporter activity	4/2242	18/32470	0.031782	0.298805	0.274024	Lus10039131.g/Lus10005934.g/Lus10018989.g/Lus10033840.g	4
GO:0046500	BP	S-adenosylmethionine metabolic process	4/2242	18/32470	0.031782	0.298805	0.274024	Lus10026541.g/Lus10009985.g/Lus10038044.g/Lus10015966.g	4
GO:0046890	BP	regulation of lipid biosynthetic process	4/2242	18/32470	0.031782	0.298805	0.274024	Lus10018594.g/Lus10002356.g/Lus10003149.g/Lus10016354.g	4
GO:0055069	BP	zinc ion homeostasis	4/2242	18/32470	0.031782	0.298805	0.274024	Lus10016487.g/Lus10040744.g/Lus10009598.g/Lus10002674.g	4
GO:0044712	BP	catabolic process	53/2242	593/32470	0.033029	0.309647	0.283967	Lus10024484.g/Lus10016369.g/Lus10014658.g/Lus10019755.g/Lus10028135.g/Lus10041003.g/C8303341.1/Lus10039994.g/Lus10020908.g/Lus10034595.g/Lus10042839.g/Lus10033706.g/Lus10015715.g/Lus10006198.g/scaffold251.59/Lus10036526.g/Lus10024927.g/Lus10031634.g/Lus10011345.g/Lus10036993.g/Lus10041402.g/Lus10041348.g/Lus10011057.g/Lus10027485.g/Lus10014765.g/Lus10039372.g/Lus10035175.g/Lus10012556.g/Lus100340…	53
GO:0006563	BP	L-serine metabolic process	7/2242	45/32470	0.0334212	0.311553	0.285715	Lus10014765.g/Lus10015947.g/Lus10021156.g/Lus10042923.g/Lus10004118.g/Lus10005333.g/Lus10037334.g	7
GO:0009845	BP	seed germination	7/2242	45/32470	0.0334212	0.311553	0.285715	Lus10021369.g/Lus10000659.g/Lus10028001.g/Lus10017049.g/Lus10018594.g/Lus10027477.g/Lus10022786.g	7
GO:0099516	MF	ion antiporter activity	9/2242	65/32470	0.0339211	0.315323	0.289171	Lus10004819.g/Lus10035507.g/Lus10040674.g/Lus10039131.g/Lus10002490.g/Lus10005934.g/Lus10015268.g/Lus10018989.g/Lus10033840.g	9
GO:0015154	MF	disaccharide transmembrane transporter activity	5/2242	27/32470	0.0352659	0.324088	0.29721	Lus10000310.g/Lus10015754.g/Lus10011335.g/Lus10007691.g/Lus10032815.g	5
GO:0015157	MF	oligosaccharide transmembrane transporter activity	5/2242	27/32470	0.0352659	0.324088	0.29721	Lus10000310.g/Lus10015754.g/Lus10011335.g/Lus10007691.g/Lus10032815.g	5
GO:0010628	BP	positive regulation of gene expression	17/2242	153/32470	0.0355138	0.324088	0.29721	Lus10005134.g/scaffold370.2/Lus10021369.g/Lus10029051.g/Lus10017049.g/Lus10022225.g/Lus10038823.g/Lus10014934.g/Lus10027404.g/Lus10003119.g/Lus10030422.g/Lus10003810.g/Lus10026637.g/Lus10018061.g/Lus10023619.g/Lus10041126.g/Lus10017289.g	17
GO:0004766	MF	spermidine synthase activity	3/2242	11/32470	0.0356731	0.324088	0.29721	Lus10003398.g/Lus10019016.g/Lus10030629.g	3
GO:0010218	BP	response to far red light	3/2242	11/32470	0.0356731	0.324088	0.29721	Lus10038823.g/Lus10003810.g/Lus10021270.g	3
GO:0015562	MF	efflux transmembrane transporter activity	3/2242	11/32470	0.0356731	0.324088	0.29721	Lus10020193.g/Lus10026994.g/Lus10002674.g	3
GO:0019747	BP	regulation of isoprenoid metabolic process	3/2242	11/32470	0.0356731	0.324088	0.29721	Lus10002356.g/Lus10003149.g/Lus10016354.g	3
GO:0051173	BP	positive regulation of nitrogen compound metabolic process	24/2242	235/32470	0.0356822	0.324088	0.29721	Lus10005134.g/Lus10010733.g/scaffold370.2/Lus10021369.g/Lus10029051.g/Lus10017049.g/Lus10022225.g/Lus10036678.g/Lus10038823.g/Lus10014934.g/Lus10027404.g/Lus10022265.g/Lus10001137.g/Lus10003119.g/Lus10035332.g/Lus10030422.g/Lus10024093.g/Lus10003810.g/Lus10026637.g/Lus10023619.g/Lus10026104.g/Lus10041126.g/Lus10007022.g/Lus10017289.g	24
GO:0015672	BP	monovalent inorganic cation transport	25/2242	247/32470	0.0357479	0.324088	0.29721	scaffold156.172/Lus10010618.g/Lus10026946.g/Lus10032154.g/Lus10018324.g/Lus10019442.g/Lus10027321.g/Lus10026944.g/Lus10010623.g/Lus10039131.g/Lus10005934.g/Lus10033179.g/Lus10033934.g/Lus10010619.g/Lus10003611.g/Lus10018989.g/Lus10014531.g/Lus10008828.g/Lus10042445.g/Lus10003259.g/Lus10033382.g/Lus10037904.g/Lus10033840.g/Lus10009829.g/Lus10043298.g	25
GO:0016758	MF	transferase activity, transferring hexosyl groups	68/2242	790/32470	0.0360243	0.325446	0.298455	Lus10032415.g/Lus10010308.g/Lus10027725.g/Lus10024583.g/Lus10003454.g/Lus10005676.g/Lus10012264.g/scaffold1247.34/Lus10012726.g/Lus10013417.g/Lus10023057.g/Lus10028572.g/Lus10030484.g/Lus10040665.g/Lus10018239.g/Lus10001468.g/Lus10042262.g/Lus10036087.g/Lus10003455.g/Lus10027959.g/Lus10037377.g/Lus10005559.g/Lus10040447.g/scaffold274.9/Lus10039277.g/Lus10010897.g/Lus10020506.g/Lus10020316.g/scaff…	68
GO:0015399	MF	primary active transmembrane transporter activity	34/2242	357/32470	0.0361936	0.325446	0.298455	Lus10027725.g/Lus10015994.g/Lus10018027.g/Lus10028810.g/Lus10026946.g/Lus10012959.g/Lus10033386.g/Lus10024965.g/Lus10042040.g/Lus10015993.g/Lus10009789.g/Lus10022858.g/Lus10034840.g/Lus10027727.g/Lus10026944.g/Lus10038681.g/Lus10010623.g/Lus10037947.g/Lus10033637.g/Lus10033179.g/Lus10027567.g/Lus10033934.g/Lus10010619.g/Lus10034387.g/Lus10008828.g/Lus10042445.g/Lus10011498.g/Lus10003259.g/Lus1003…	34
GO:0015405	MF	P-P-bond-hydrolysis-driven transmembrane transporter activity	34/2242	357/32470	0.0361936	0.325446	0.298455	Lus10027725.g/Lus10015994.g/Lus10018027.g/Lus10028810.g/Lus10026946.g/Lus10012959.g/Lus10033386.g/Lus10024965.g/Lus10042040.g/Lus10015993.g/Lus10009789.g/Lus10022858.g/Lus10034840.g/Lus10027727.g/Lus10026944.g/Lus10038681.g/Lus10010623.g/Lus10037947.g/Lus10033637.g/Lus10033179.g/Lus10027567.g/Lus10033934.g/Lus10010619.g/Lus10034387.g/Lus10008828.g/Lus10042445.g/Lus10011498.g/Lus10003259.g/Lus1003…	34
GO:0007154	BP	cell communication	115/2242	1412/32470	0.0363385	0.325862	0.298836	Lus10004645.g/Lus10030229.g/Lus10026667.g/Lus10042731.g/Lus10025245.g/scaffold231.9/Lus10011824.g/Lus10005618.g/Lus10027969.g/scaffold732.45/Lus10039404.g/Lus10007283.g/Lus10021190.g/Lus10040044.g/Lus10020719.g/Lus10017252.g/scaffold244.27/Lus10007284.g/scaffold1202.11/Lus10005619.g/Lus10024192.g/Lus10000659.g/Lus10006369.g/Lus10028001.g/Lus10002900.g/Lus10003460.g/Lus10036667.g/Lus10037819.g/Lus…	115
GO:0016790	MF	thiolester hydrolase activity	7/2242	46/32470	0.0371559	0.331005	0.303553	Lus10020760.g/Lus10007336.g/Lus10026054.g/Lus10014347.g/Lus10043253.g/Lus10038717.g/Lus10007334.g	7
GO:0030004	BP	cellular monovalent inorganic cation homeostasis	7/2242	46/32470	0.0371559	0.331005	0.303553	Lus10026946.g/Lus10026944.g/Lus10010623.g/Lus10033179.g/Lus10010619.g/Lus10042445.g/Lus10003259.g	7
GO:0003006	BP	developmental process involved in reproduction	47/2242	521/32470	0.037213	0.331005	0.303553	Lus10030446.g/Lus10016056.g/scaffold272.125/Lus10027969.g/Lus10021369.g/Lus10041310.g/Lus10020719.g/Lus10005106.g/Lus10017223.g/Lus10000659.g/Lus10028001.g/Lus10017049.g/Lus10040415.g/Lus10035472.g/Lus10002500.g/Lus10031826.g/Lus10029876.g/Lus10026617.g/Lus10037032.g/Lus10022060.g/Lus10035662.g/Lus10004646.g/Lus10041348.g/Lus10022636.g/Lus10041794.g/Lus10000639.g/Lus10027404.g/Lus10004561.g/Lus10…	47
GO:0016820	MF	ATPase activity, coupled to transmembrane movement of substances	33/2242	346/32470	0.0379009	0.336218	0.308334	Lus10027725.g/Lus10015994.g/Lus10018027.g/Lus10028810.g/Lus10026946.g/Lus10012959.g/Lus10033386.g/Lus10024965.g/Lus10042040.g/Lus10015993.g/Lus10009789.g/Lus10022858.g/Lus10034840.g/Lus10027727.g/Lus10026944.g/Lus10038681.g/Lus10010623.g/Lus10037947.g/Lus10033637.g/Lus10033179.g/Lus10027567.g/Lus10033934.g/Lus10010619.g/Lus10034387.g/Lus10042445.g/Lus10011498.g/Lus10003259.g/Lus10039320.g/Lus1003…	33
GO:0008652	BP	cellular amino acid biosynthetic process	29/2242	297/32470	0.0380636	0.336337	0.308443	Lus10004697.g/Lus10014407.g/Lus10040264.g/Lus10014658.g/Lus10001018.g/Lus10001016.g/Lus10008521.g/C8303341.1/Lus10004696.g/Lus10040263.g/Lus10001019.g/Lus10029955.g/Lus10037544.g/scaffold464.140/Lus10014765.g/Lus10040262.g/Lus10030158.g/Lus10012536.g/Lus10021902.g/Lus10019103.g/Lus10010505.g/Lus10015947.g/Lus10032150.g/Lus10015966.g/Lus10016354.g/Lus10021156.g/Lus10004118.g/Lus10005333.g/Lus10037…	29
GO:0016878	MF	acid-thiol ligase activity	4/2242	19/32470	0.0381182	0.336337	0.308443	Lus10037735.g/Lus10016870.g/Lus10016869.g/Lus10027477.g	4
GO:0043531	MF	ADP binding	15/2242	132/32470	0.0390845	0.343943	0.315419	Lus10006793.g/Lus10032759.g/Lus10005218.g/Lus10028639.g/Lus10000417.g/Lus10018937.g/Lus10039540.g/Lus10014922.g/Lus10041606.g/Lus10026132.g/Lus10021769.g/Lus10005321.g/Lus10039548.g/Lus10041078.g/Lus10002737.g	15
GO:0005977	BP	glycogen metabolic process	6/2242	37/32470	0.039587	0.345601	0.316938	Lus10027725.g/Lus10012264.g/Lus10023553.g/Lus10034595.g/Lus10016012.g/Lus10040437.g	6
GO:0006112	BP	energy reserve metabolic process	6/2242	37/32470	0.039587	0.345601	0.316938	Lus10027725.g/Lus10012264.g/Lus10023553.g/Lus10034595.g/Lus10016012.g/Lus10040437.g	6
GO:0019751	BP	polyol metabolic process	6/2242	37/32470	0.039587	0.345601	0.316938	Lus10000692.g/Lus10006198.g/Lus10035662.g/Lus10019671.g/Lus10018235.g/Lus10040669.g	6
GO:0009611	BP	response to wounding	9/2242	67/32470	0.0401849	0.349538	0.32055	Lus10042731.g/scaffold732.45/Lus10014740.g/Lus10011929.g/Lus10039911.g/Lus10027639.g/Lus10008129.g/Lus10013166.g/Lus10027648.g	9
GO:0070972	BP	protein localization to endoplasmic reticulum	7/2242	47/32470	0.0411547	0.349538	0.32055	scaffold43.21/Lus10037011.g/Lus10022763.g/Lus10003146.g/Lus10015793.g/Lus10017891.g/Lus10040614.g	7
GO:0006449	BP	regulation of translational termination	2/2242	5/32470	0.041415	0.349538	0.32055	Lus10030422.g/Lus10026637.g	2
GO:0008115	MF	sarcosine oxidase activity	2/2242	5/32470	0.041415	0.349538	0.32055	Lus10026933.g/Lus10020132.g	2
GO:0008395	MF	steroid hydroxylase activity	2/2242	5/32470	0.041415	0.349538	0.32055	scaffold272.125/Lus10041794.g	2
GO:0010227	BP	floral organ abscission	2/2242	5/32470	0.041415	0.349538	0.32055	Lus10038582.g/Lus10037882.g	2
GO:0019008	CC	molybdopterin synthase complex	2/2242	5/32470	0.041415	0.349538	0.32055	Lus10006989.g/Lus10041075.g	2
GO:0032389	CC	MutLalpha complex	2/2242	5/32470	0.041415	0.349538	0.32055	Lus10034734.g/Lus10033274.g	2
GO:0032958	BP	inositol phosphate biosynthetic process	2/2242	5/32470	0.041415	0.349538	0.32055	Lus10018235.g/Lus10040669.g	2
GO:0033858	MF	N-acetylgalactosamine kinase activity	2/2242	5/32470	0.041415	0.349538	0.32055	Lus10037789.g/Lus10016320.g	2
GO:0036422	MF	heptaprenyl diphosphate synthase activity	2/2242	5/32470	0.041415	0.349538	0.32055	Lus10013703.g/Lus10005570.g	2
GO:0047513	MF	1,2-alpha-L-fucosidase activity	2/2242	5/32470	0.041415	0.349538	0.32055	Lus10029689.g/Lus10020979.g	2
GO:0047998	MF	hyoscyamine (6S)-dioxygenase activity	2/2242	5/32470	0.041415	0.349538	0.32055	Lus10023851.g/Lus10000711.g	2
GO:0005996	BP	monosaccharide metabolic process	31/2242	324/32470	0.0415689	0.349943	0.32092	Lus10032078.g/Lus10024583.g/scaffold98.117/Lus10014614.g/scaffold1247.34/Lus10028572.g/Lus10037789.g/Lus10034595.g/Lus10038423.g/Lus10015715.g/Lus10042262.g/scaffold274.9/Lus10039277.g/Lus10010897.g/Lus10030673.g/Lus10005450.g/Lus10031819.g/Lus10014437.g/Lus10019833.g/Lus10031434.g/Lus10032079.g/Lus10042261.g/Lus10013500.g/Lus10016320.g/Lus10038620.g/Lus10019808.g/Lus10031877.g/Lus10014105.g/Lus1…	31
GO:0006875	BP	cellular metal ion homeostasis	14/2242	122/32470	0.0420771	0.352214	0.323003	Lus10035730.g/Lus10039419.g/Lus10030514.g/Lus10016487.g/Lus10040965.g/Lus10042946.g/Lus10002865.g/Lus10017730.g/Lus10040744.g/Lus10004465.g/Lus10009598.g/Lus10002674.g/scaffold43.7/Lus10039073.g	14
GO:0009719	BP	response to endogenous stimulus	66/2242	771/32470	0.042159	0.352214	0.323003	Lus10042731.g/Lus10011824.g/Lus10013155.g/Lus10027969.g/scaffold732.45/Lus10007283.g/Lus10021190.g/Lus10043186.g/Lus10005652.g/Lus10021369.g/Lus10020719.g/scaffold1202.11/Lus10005619.g/Lus10000659.g/Lus10028001.g/Lus10017049.g/Lus10002900.g/Lus10036667.g/Lus10021098.g/Lus10007849.g/Lus10037032.g/Lus10014657.g/Lus10011929.g/Lus10009040.g/Lus10020193.g/Lus10022060.g/Lus10017977.g/Lus10039911.g/Lus1…	66
GO:0009725	BP	response to hormone	66/2242	771/32470	0.042159	0.352214	0.323003	Lus10042731.g/Lus10011824.g/Lus10013155.g/Lus10027969.g/scaffold732.45/Lus10007283.g/Lus10021190.g/Lus10043186.g/Lus10005652.g/Lus10021369.g/Lus10020719.g/scaffold1202.11/Lus10005619.g/Lus10000659.g/Lus10028001.g/Lus10017049.g/Lus10002900.g/Lus10036667.g/Lus10021098.g/Lus10007849.g/Lus10037032.g/Lus10014657.g/Lus10011929.g/Lus10009040.g/Lus10020193.g/Lus10022060.g/Lus10017977.g/Lus10039911.g/Lus1…	66
GO:0098656	BP	anion transmembrane transport	19/2242	180/32470	0.043028	0.358567	0.328829	scaffold51.48/Lus10008352.g/Lus10005239.g/Lus10003903.g/Lus10030683.g/Lus10038639.g/Lus10029605.g/Lus10001334.g/Lus10037544.g/Lus10018692.g/Lus10027321.g/Lus10042864.g/Lus10038640.g/Lus10001908.g/Lus10028165.g/Lus10012444.g/Lus10041482.g/Lus10008572.g/Lus10039180.g	19
GO:0051716	BP	cellular response to stimulus	150/2242	1896/32470	0.0433829	0.360614	0.330707	Lus10000310.g/Lus10015754.g/Lus10004645.g/Lus10030229.g/Lus10026667.g/Lus10042731.g/Lus10025245.g/scaffold231.9/Lus10011824.g/Lus10005618.g/Lus10035730.g/Lus10027969.g/scaffold732.45/Lus10039404.g/Lus10007283.g/Lus10021190.g/Lus10040044.g/Lus10011335.g/Lus10020719.g/Lus10035832.g/Lus10017252.g/scaffold244.27/Lus10007284.g/scaffold1202.11/Lus10005619.g/Lus10024192.g/Lus10005783.g/Lus10000659.g/Lus…	150
GO:0009904	BP	chloroplast accumulation movement	4/2242	20/32470	0.0451235	0.366988	0.336552	Lus10016626.g/Lus10022531.g/Lus10017614.g/Lus10033572.g	4
GO:0016653	MF	oxidoreductase activity, acting on NAD(P)H, heme protein as acceptor	4/2242	20/32470	0.0451235	0.366988	0.336552	Lus10025485.g/Lus10034869.g/Lus10033405.g/Lus10025484.g	4
GO:0004124	MF	cysteine synthase activity	3/2242	12/32470	0.0451781	0.366988	0.336552	Lus10014765.g/Lus10015947.g/Lus10004118.g	3
GO:0004617	MF	phosphoglycerate dehydrogenase activity	3/2242	12/32470	0.0451781	0.366988	0.336552	C8303341.1/Lus10032150.g/Lus10037334.g	3
GO:0043405	BP	regulation of MAP kinase activity	3/2242	12/32470	0.0451781	0.366988	0.336552	Lus10021940.g/Lus10022265.g/Lus10001137.g	3
GO:0043408	BP	regulation of MAPK cascade	3/2242	12/32470	0.0451781	0.366988	0.336552	Lus10021940.g/Lus10022265.g/Lus10001137.g	3
GO:0055075	BP	potassium ion homeostasis	3/2242	12/32470	0.0451781	0.366988	0.336552	Lus10005934.g/Lus10018989.g/Lus10033840.g	3
GO:0071470	BP	cellular response to osmotic stress	3/2242	12/32470	0.0451781	0.366988	0.336552	Lus10000310.g/Lus10015754.g/Lus10011335.g	3
GO:0005355	MF	glucose transmembrane transporter activity	11/2242	90/32470	0.0455715	0.366988	0.336552	Lus10033814.g/Lus10029966.g/Lus10035354.g/Lus10011288.g/Lus10029970.g/Lus10028303.g/Lus10041748.g/Lus10029962.g/Lus10018956.g/Lus10040482.g/Lus10005870.g	11
GO:0015149	MF	hexose transmembrane transporter activity	11/2242	90/32470	0.0455715	0.366988	0.336552	Lus10033814.g/Lus10029966.g/Lus10035354.g/Lus10011288.g/Lus10029970.g/Lus10028303.g/Lus10041748.g/Lus10029962.g/Lus10018956.g/Lus10040482.g/Lus10005870.g	11
GO:0046323	BP	glucose import	11/2242	90/32470	0.0455715	0.366988	0.336552	Lus10033814.g/Lus10029966.g/Lus10035354.g/Lus10011288.g/Lus10029970.g/Lus10028303.g/Lus10041748.g/Lus10029962.g/Lus10018956.g/Lus10040482.g/Lus10005870.g	11
GO:0051172	BP	negative regulation of nitrogen compound metabolic process	24/2242	241/32470	0.0456619	0.366988	0.336552	Lus10005134.g/scaffold732.45/scaffold370.2/Lus10021767.g/Lus10012202.g/Lus10008007.g/Lus10019348.g/Lus10007849.g/Lus10021940.g/Lus10011929.g/Lus10009351.g/Lus10039911.g/Lus10004759.g/Lus10001012.g/Lus10043200.g/Lus10027639.g/Lus10017724.g/Lus10008129.g/Lus10024485.g/Lus10021650.g/Lus10013166.g/Lus10027648.g/Lus10041718.g/Lus10043433.g	24
GO:0009890	BP	negative regulation of biosynthetic process	21/2242	205/32470	0.0457066	0.366988	0.336552	Lus10005134.g/scaffold732.45/scaffold370.2/Lus10012202.g/Lus10008007.g/Lus10019348.g/Lus10007849.g/Lus10011929.g/Lus10009351.g/Lus10039911.g/Lus10004759.g/Lus10001012.g/Lus10043200.g/Lus10027639.g/Lus10008129.g/Lus10024485.g/Lus10021650.g/Lus10013166.g/Lus10027648.g/Lus10041718.g/Lus10043433.g	21
GO:0031327	BP	negative regulation of cellular biosynthetic process	21/2242	205/32470	0.0457066	0.366988	0.336552	Lus10005134.g/scaffold732.45/scaffold370.2/Lus10012202.g/Lus10008007.g/Lus10019348.g/Lus10007849.g/Lus10011929.g/Lus10009351.g/Lus10039911.g/Lus10004759.g/Lus10001012.g/Lus10043200.g/Lus10027639.g/Lus10008129.g/Lus10024485.g/Lus10021650.g/Lus10013166.g/Lus10027648.g/Lus10041718.g/Lus10043433.g	21
GO:0006520	BP	cellular amino acid metabolic process	54/2242	619/32470	0.0460995	0.369244	0.338621	Lus10004697.g/Lus10014407.g/Lus10017934.g/Lus10040264.g/Lus10022137.g/Lus10014658.g/Lus10039861.g/Lus10028135.g/scaffold338.16/Lus10033661.g/Lus10001018.g/Lus10001016.g/Lus10008521.g/C8303341.1/Lus10004696.g/Lus10007247.g/Lus10042839.g/Lus10040263.g/Lus10001019.g/Lus10029955.g/Lus10013676.g/Lus10029820.g/Lus10037544.g/scaffold464.140/Lus10014765.g/Lus10017705.g/Lus10040262.g/Lus10034095.g/Lus1003…	54
GO:0006825	BP	copper ion transport	5/2242	29/32470	0.0463375	0.369357	0.338725	Lus10009789.g/Lus10017730.g/Lus10009819.g/Lus10040925.g/Lus10037356.g	5
GO:0031627	BP	telomeric loop formation	5/2242	29/32470	0.0463375	0.369357	0.338725	Lus10010844.g/Lus10011320.g/Lus10023406.g/Lus10025203.g/Lus10012092.g	5
GO:0004842	MF	ubiquitin-protein transferase activity	44/2242	491/32470	0.0465872	0.370453	0.339729	Lus10017257.g/Lus10028700.g/Lus10022706.g/Lus10030599.g/Lus10025885.g/Lus10014208.g/Lus10005220.g/Lus10033472.g/Lus10035332.g/Lus10009422.g/Lus10030117.g/Lus10003792.g/Lus10019908.g/Lus10024093.g/Lus10013235.g/Lus10006638.g/Lus10030597.g/Lus10036739.g/Lus10030891.g/Lus10021403.g/Lus10038656.g/Lus10000513.g/Lus10016162.g/Lus10030755.g/scaffold127.46/Lus10039197.g/Lus10017089.g/Lus10016898.g/Lus100…	44
GO:0015711	BP	organic anion transport	23/2242	230/32470	0.0476798	0.378229	0.346861	scaffold51.48/Lus10008352.g/Lus10005239.g/Lus10003903.g/Lus10030683.g/Lus10003738.g/Lus10038639.g/Lus10029605.g/Lus10001334.g/Lus10037544.g/Lus10018692.g/Lus10027321.g/Lus10042864.g/Lus10038640.g/Lus10001908.g/Lus10028165.g/Lus10012444.g/Lus10008964.g/Lus10041482.g/Lus10008572.g/Lus10022238.g/Lus10033406.g/Lus10039180.g	23
GO:0005351	MF	carbohydrate:proton symporter activity	12/2242	102/32470	0.0485856	0.38025	0.348715	Lus10033814.g/Lus10025800.g/Lus10029966.g/Lus10035354.g/Lus10011288.g/Lus10029970.g/Lus10028303.g/Lus10041748.g/Lus10029962.g/Lus10018956.g/Lus10040482.g/Lus10005870.g	12
GO:0005402	MF	carbohydrate:cation symporter activity	12/2242	102/32470	0.0485856	0.38025	0.348715	Lus10033814.g/Lus10025800.g/Lus10029966.g/Lus10035354.g/Lus10011288.g/Lus10029970.g/Lus10028303.g/Lus10041748.g/Lus10029962.g/Lus10018956.g/Lus10040482.g/Lus10005870.g	12
GO:0006302	BP	double-strand break repair	12/2242	102/32470	0.0485856	0.38025	0.348715	Lus10005783.g/Lus10019348.g/Lus10028385.g/Lus10006818.g/Lus10034749.g/Lus10027219.g/Lus10037630.g/Lus10021585.g/Lus10016644.g/Lus10004462.g/Lus10029476.g/Lus10015868.g	12
GO:0015295	MF	solute:proton symporter activity	12/2242	102/32470	0.0485856	0.38025	0.348715	Lus10033814.g/Lus10025800.g/Lus10029966.g/Lus10035354.g/Lus10011288.g/Lus10029970.g/Lus10028303.g/Lus10041748.g/Lus10029962.g/Lus10018956.g/Lus10040482.g/Lus10005870.g	12
GO:0015145	MF	monosaccharide transmembrane transporter activity	11/2242	91/32470	0.0487412	0.38025	0.348715	Lus10033814.g/Lus10029966.g/Lus10035354.g/Lus10011288.g/Lus10029970.g/Lus10028303.g/Lus10041748.g/Lus10029962.g/Lus10018956.g/Lus10040482.g/Lus10005870.g	11
GO:0035428	BP	hexose transmembrane transport	11/2242	91/32470	0.0487412	0.38025	0.348715	Lus10033814.g/Lus10029966.g/Lus10035354.g/Lus10011288.g/Lus10029970.g/Lus10028303.g/Lus10041748.g/Lus10029962.g/Lus10018956.g/Lus10040482.g/Lus10005870.g	11
GO:1905950	BP	monosaccharide transmembrane transport	11/2242	91/32470	0.0487412	0.38025	0.348715	Lus10033814.g/Lus10029966.g/Lus10035354.g/Lus10011288.g/Lus10029970.g/Lus10028303.g/Lus10041748.g/Lus10029962.g/Lus10018956.g/Lus10040482.g/Lus10005870.g	11
GO:0004620	MF	phospholipase activity	8/2242	59/32470	0.0489773	0.381192	0.349578	Lus10033706.g/Lus10031634.g/Lus10029873.g/scaffold87.43/Lus10020672.g/Lus10042540.g/Lus10009894.g/Lus10040664.g	8
GO:0016857	MF	racemase and epimerase activity, acting on carbohydrates and derivatives	7/2242	49/32470	0.0499642	0.387957	0.355782	scaffold98.117/Lus10019967.g/Lus10038423.g/Lus10015715.g/Lus10030673.g/Lus10032391.g/Lus10023077.g	7
GO:0019725	BP	cellular homeostasis	41/2242	456/32470	0.0509026	0.393476	0.360843	Lus10035730.g/Lus10040652.g/Lus10039419.g/Lus10030514.g/Lus10016487.g/Lus10003194.g/Lus10026946.g/Lus10026878.g/Lus10040965.g/Lus10037895.g/Lus10042946.g/Lus10002865.g/Lus10035281.g/Lus10035175.g/Lus10012556.g/Lus10026944.g/Lus10003437.g/Lus10010623.g/Lus10017730.g/Lus10040744.g/Lus10034196.g/Lus10042104.g/Lus10004465.g/Lus10033179.g/Lus10009598.g/Lus10010619.g/Lus10043103.g/Lus10012909.g/Lus1000…	41
GO:0009409	BP	response to cold	9/2242	70/32470	0.050974	0.393476	0.360843	Lus10005134.g/scaffold370.2/Lus10005652.g/Lus10037032.g/Lus10017977.g/Lus10035670.g/Lus10016273.g/Lus10032127.g/Lus10021827.g	9
GO:0016757	MF	transferase activity, transferring glycosyl groups	85/2242	1031/32470	0.0510326	0.393476	0.360843	Lus10032415.g/Lus10010308.g/Lus10027725.g/Lus10024583.g/Lus10035441.g/Lus10003454.g/Lus10005676.g/Lus10012264.g/scaffold1247.34/Lus10012726.g/Lus10013417.g/Lus10003113.g/Lus10023057.g/Lus10029152.g/Lus10021273.g/Lus10028572.g/Lus10030484.g/Lus10040665.g/Lus10018239.g/Lus10001468.g/Lus10042262.g/Lus10036087.g/Lus10003455.g/Lus10027959.g/Lus10037377.g/Lus10005559.g/Lus10040447.g/Lus10013576.g/scaff…	85
GO:0008645	BP	hexose transmembrane transport	11/2242	92/32470	0.0520568	0.399506	0.366373	Lus10033814.g/Lus10029966.g/Lus10035354.g/Lus10011288.g/Lus10029970.g/Lus10028303.g/Lus10041748.g/Lus10029962.g/Lus10018956.g/Lus10040482.g/Lus10005870.g	11
GO:0015758	BP	glucose transmembrane transport	11/2242	92/32470	0.0520568	0.399506	0.366373	Lus10033814.g/Lus10029966.g/Lus10035354.g/Lus10011288.g/Lus10029970.g/Lus10028303.g/Lus10041748.g/Lus10029962.g/Lus10018956.g/Lus10040482.g/Lus10005870.g	11
GO:0006596	BP	polyamine biosynthetic process	5/2242	30/32470	0.0525634	0.402376	0.369005	Lus10003398.g/Lus10019016.g/Lus10040973.g/Lus10035083.g/Lus10030629.g	5
GO:0032844	BP	homeostatic process	4/2242	21/32470	0.0527966	0.402376	0.369005	Lus10016487.g/Lus10040744.g/Lus10009598.g/Lus10002674.g	4
GO:0033179	CC	proton-transporting V-type ATPase, V0 domain	4/2242	21/32470	0.0527966	0.402376	0.369005	Lus10010618.g/Lus10010623.g/Lus10033179.g/Lus10010619.g	4
GO:1901701	BP	cellular response to oxygen-containing compound	27/2242	282/32470	0.0537396	0.408619	0.37473	Lus10042731.g/Lus10011824.g/Lus10027969.g/scaffold732.45/Lus10021190.g/Lus10020719.g/scaffold1202.11/Lus10005619.g/Lus10000659.g/Lus10028001.g/Lus10002900.g/Lus10036667.g/Lus10037032.g/Lus10014657.g/Lus10011929.g/Lus10039911.g/Lus10002028.g/Lus10017251.g/Lus10025845.g/Lus10041093.g/Lus10015009.g/Lus10027639.g/Lus10035801.g/Lus10008129.g/Lus10015238.g/Lus10013166.g/Lus10027648.g	27
GO:0009791	BP	post-embryonic development	53/2242	613/32470	0.0544249	0.411006	0.37692	Lus10030446.g/Lus10016056.g/scaffold272.125/Lus10027969.g/Lus10021369.g/Lus10041310.g/Lus10020719.g/Lus10005106.g/Lus10017223.g/Lus10000659.g/Lus10006369.g/Lus10028001.g/Lus10017049.g/Lus10002900.g/Lus10035472.g/Lus10002500.g/Lus10031826.g/Lus10029876.g/Lus10026617.g/Lus10037032.g/Lus10022060.g/Lus10035662.g/Lus10004646.g/scaffold33.133/Lus10018594.g/Lus10041348.g/Lus10022636.g/Lus10041794.g/Lus1…	53
GO:0019787	MF	ubiquitin-like protein transferase activity	44/2242	497/32470	0.0546844	0.411006	0.37692	Lus10017257.g/Lus10028700.g/Lus10022706.g/Lus10030599.g/Lus10025885.g/Lus10014208.g/Lus10005220.g/Lus10033472.g/Lus10035332.g/Lus10009422.g/Lus10030117.g/Lus10003792.g/Lus10019908.g/Lus10024093.g/Lus10013235.g/Lus10006638.g/Lus10030597.g/Lus10036739.g/Lus10030891.g/Lus10021403.g/Lus10038656.g/Lus10000513.g/Lus10016162.g/Lus10030755.g/scaffold127.46/Lus10039197.g/Lus10017089.g/Lus10016898.g/Lus100…	44
GO:0036442	MF	proton-exporting ATPase activity	9/2242	71/32470	0.0549545	0.411006	0.37692	Lus10026946.g/Lus10026944.g/Lus10010623.g/Lus10033179.g/Lus10033934.g/Lus10010619.g/Lus10042445.g/Lus10003259.g/Lus10033382.g	9
GO:0005385	MF	zinc ion transmembrane transporter activity	6/2242	40/32470	0.0549618	0.411006	0.37692	Lus10016487.g/Lus10040744.g/Lus10009598.g/Lus10002674.g/Lus10024107.g/Lus10031872.g	6
GO:0005773	CC	vacuole	59/2242	692/32470	0.0554431	0.411006	0.37692	Lus10004340.g/Lus10037951.g/Lus10024599.g/Lus10040652.g/Lus10016487.g/Lus10015786.g/Lus10010618.g/Lus10011237.g/Lus10033706.g/Lus10030233.g/Lus10005933.g/Lus10024303.g/Lus10034895.g/Lus10029689.g/Lus10012211.g/Lus10031634.g/Lus10037895.g/Lus10028922.g/Lus10028797.g/Lus10018594.g/Lus10022924.g/Lus10034218.g/Lus10037019.g/Lus10027321.g/Lus10010623.g/Lus10006130.g/Lus10040744.g/Lus10015032.g/Lus1003…	59
GO:0004557	MF	alpha-galactosidase activity	3/2242	13/32470	0.0557972	0.411006	0.37692	Lus10034218.g/Lus10029046.g/Lus10011407.g	3
GO:0006493	BP	protein O-linked glycosylation	3/2242	13/32470	0.0557972	0.411006	0.37692	Lus10003113.g/Lus10004779.g/Lus10003576.g	3
GO:0006564	BP	L-serine biosynthetic process	3/2242	13/32470	0.0557972	0.411006	0.37692	Lus10021156.g/Lus10005333.g/Lus10037334.g	3
GO:0009631	BP	cold acclimation	3/2242	13/32470	0.0557972	0.411006	0.37692	Lus10005652.g/Lus10017977.g/Lus10021827.g	3
GO:0015706	BP	nitrate transport	3/2242	13/32470	0.0557972	0.411006	0.37692	Lus10000673.g/Lus10024614.g/Lus10032252.g	3
GO:0015969	BP	guanosine tetraphosphate metabolic process	3/2242	13/32470	0.0557972	0.411006	0.37692	Lus10001862.g/Lus10037672.g/Lus10022102.g	3
GO:0016408	MF	C-acyltransferase activity	3/2242	13/32470	0.0557972	0.411006	0.37692	Lus10039109.g/Lus10022812.g/Lus10011879.g	3
GO:0034035	BP	purine ribonucleoside bisphosphate metabolic process	3/2242	13/32470	0.0557972	0.411006	0.37692	Lus10001862.g/Lus10037672.g/Lus10022102.g	3
GO:0052692	MF	raffinose alpha-galactosidase activity	3/2242	13/32470	0.0557972	0.411006	0.37692	Lus10034218.g/Lus10029046.g/Lus10011407.g	3
GO:0031325	BP	positive regulation of cellular metabolic process	24/2242	247/32470	0.0575362	0.420057	0.38522	Lus10005134.g/Lus10010733.g/scaffold370.2/Lus10021369.g/Lus10029051.g/Lus10017049.g/Lus10022225.g/Lus10036678.g/Lus10038823.g/Lus10014934.g/Lus10027404.g/Lus10022265.g/Lus10001137.g/Lus10003119.g/Lus10035332.g/Lus10030422.g/Lus10024093.g/Lus10003810.g/Lus10026637.g/Lus10023619.g/Lus10026104.g/Lus10041126.g/Lus10007022.g/Lus10017289.g	24
GO:0005516	MF	calmodulin binding	16/2242	151/32470	0.0578763	0.420057	0.38522	Lus10011824.g/Lus10021190.g/scaffold1202.11/Lus10005619.g/Lus10036667.g/Lus10033386.g/Lus10014657.g/Lus10042040.g/Lus10034840.g/Lus10017251.g/Lus10041093.g/Lus10015009.g/Lus10008340.g/Lus10018687.g/Lus10018044.g/Lus10010133.g	16
GO:0006310	BP	DNA recombination	19/2242	187/32470	0.0589694	0.420057	0.38522	Lus10021767.g/Lus10005783.g/Lus10019348.g/Lus10041143.g/Lus10028385.g/Lus10006818.g/Lus10034749.g/Lus10010242.g/Lus10023694.g/Lus10027219.g/Lus10037630.g/Lus10021585.g/Lus10016644.g/Lus10036517.g/Lus10017724.g/Lus10039383.g/Lus10004462.g/Lus10029476.g/Lus10015868.g	19
GO:0010228	BP	vegetative to reproductive phase transition of meristem	9/2242	72/32470	0.0591314	0.420057	0.38522	Lus10016056.g/Lus10000659.g/Lus10028001.g/Lus10035472.g/Lus10031826.g/Lus10035332.g/Lus10025177.g/Lus10007459.g/Lus10010133.g	9
GO:0015749	BP	monosaccharide transmembrane transport	11/2242	94/32470	0.059134	0.420057	0.38522	Lus10033814.g/Lus10029966.g/Lus10035354.g/Lus10011288.g/Lus10029970.g/Lus10028303.g/Lus10041748.g/Lus10029962.g/Lus10018956.g/Lus10040482.g/Lus10005870.g	11
GO:0010212	BP	response to ionizing radiation	5/2242	31/32470	0.0592516	0.420057	0.38522	Lus10005783.g/Lus10006818.g/Lus10021585.g/Lus10004462.g/Lus10015868.g	5
GO:0000187	BP	activation of MAPK activity	2/2242	6/32470	0.0593172	0.420057	0.38522	Lus10022265.g/Lus10001137.g	2
GO:0001758	MF	retinal dehydrogenase activity	2/2242	6/32470	0.0593172	0.420057	0.38522	Lus10043245.g/Lus10019387.g	2
GO:0006570	BP	tyrosine metabolic process	2/2242	6/32470	0.0593172	0.420057	0.38522	Lus10028135.g/Lus10042839.g	2
GO:0010200	BP	response to chitin	2/2242	6/32470	0.0593172	0.420057	0.38522	Lus10014631.g/Lus10033798.g	2
GO:0030100	BP	regulation of endocytosis	2/2242	6/32470	0.0593172	0.420057	0.38522	Lus10029873.g/Lus10020672.g	2
GO:0035066	BP	positive regulation of histone acetylation	2/2242	6/32470	0.0593172	0.420057	0.38522	Lus10010733.g/Lus10036678.g	2
GO:0046786	BP	viral replication complex formation and maintenance	2/2242	6/32470	0.0593172	0.420057	0.38522	Lus10030942.g/Lus10040105.g	2
GO:0046900	BP	tetrahydrofolylpolyglutamate metabolic process	2/2242	6/32470	0.0593172	0.420057	0.38522	Lus10004694.g/Lus10040261.g	2
GO:0051382	BP	kinetochore assembly	2/2242	6/32470	0.0593172	0.420057	0.38522	Lus10011470.g/Lus10023105.g	2
GO:0051383	BP	kinetochore organization	2/2242	6/32470	0.0593172	0.420057	0.38522	Lus10011470.g/Lus10023105.g	2
GO:1901985	BP	positive regulation of protein acetylation	2/2242	6/32470	0.0593172	0.420057	0.38522	Lus10010733.g/Lus10036678.g	2
GO:2000758	BP	positive regulation of peptidyl-lysine acetylation	2/2242	6/32470	0.0593172	0.420057	0.38522	Lus10010733.g/Lus10036678.g	2
GO:0009966	BP	regulation of signal transduction	16/2242	152/32470	0.0607266	0.427287	0.39185	Lus10042731.g/Lus10027969.g/scaffold732.45/Lus10020719.g/Lus10021940.g/Lus10011929.g/Lus10039911.g/Lus10022265.g/Lus10001137.g/Lus10021403.g/Lus10038656.g/Lus10016162.g/Lus10027639.g/Lus10008129.g/Lus10013166.g/Lus10027648.g	16
GO:0010557	BP	positive regulation of macromolecule biosynthetic process	16/2242	152/32470	0.0607266	0.427287	0.39185	Lus10005134.g/scaffold370.2/Lus10021369.g/Lus10029051.g/Lus10017049.g/Lus10022225.g/Lus10038823.g/Lus10014934.g/Lus10027404.g/Lus10003119.g/Lus10030422.g/Lus10003810.g/Lus10026637.g/Lus10023619.g/Lus10041126.g/Lus10017289.g	16
GO:0023051	BP	regulation of signaling	16/2242	152/32470	0.0607266	0.427287	0.39185	Lus10042731.g/Lus10027969.g/scaffold732.45/Lus10020719.g/Lus10021940.g/Lus10011929.g/Lus10039911.g/Lus10022265.g/Lus10001137.g/Lus10021403.g/Lus10038656.g/Lus10016162.g/Lus10027639.g/Lus10008129.g/Lus10013166.g/Lus10027648.g	16
GO:1901606	BP	alpha-amino acid catabolic process	8/2242	62/32470	0.0624555	0.429924	0.394268	Lus10014658.g/Lus10028135.g/Lus10042839.g/Lus10034095.g/Lus10034094.g/Lus10019822.g/Lus10014091.g/Lus10014092.g	8
GO:0009753	BP	response to jasmonic acid	7/2242	52/32470	0.0652601	0.429924	0.394268	scaffold732.45/Lus10011929.g/Lus10039911.g/Lus10027639.g/Lus10008129.g/Lus10013166.g/Lus10027648.g	7
GO:0090351	BP	seedling development	7/2242	52/32470	0.0652601	0.429924	0.394268	Lus10021369.g/Lus10000659.g/Lus10028001.g/Lus10017049.g/Lus10018594.g/Lus10027477.g/Lus10022786.g	7
GO:0019829	MF	cation-transporting ATPase activity	15/2242	142/32470	0.0661163	0.429924	0.394268	Lus10026946.g/Lus10033386.g/Lus10042040.g/Lus10009789.g/Lus10034840.g/Lus10026944.g/Lus10010623.g/Lus10033179.g/Lus10033934.g/Lus10010619.g/Lus10042445.g/Lus10003259.g/Lus10033382.g/Lus10018687.g/Lus10018044.g	15
GO:0051238	BP	sequestering of metal ion	5/2242	32/32470	0.0664012	0.429924	0.394268	Lus10035730.g/Lus10016487.g/Lus10040744.g/Lus10009598.g/Lus10002674.g	5
GO:0010646	BP	regulation of cell communication	16/2242	154/32470	0.0667109	0.429924	0.394268	Lus10042731.g/Lus10027969.g/scaffold732.45/Lus10020719.g/Lus10021940.g/Lus10011929.g/Lus10039911.g/Lus10022265.g/Lus10001137.g/Lus10021403.g/Lus10038656.g/Lus10016162.g/Lus10027639.g/Lus10008129.g/Lus10013166.g/Lus10027648.g	16
GO:0015849	BP	organic acid transport	18/2242	178/32470	0.0670637	0.429924	0.394268	scaffold51.48/Lus10008352.g/Lus10005239.g/Lus10003903.g/Lus10030683.g/Lus10003738.g/Lus10038639.g/Lus10001334.g/Lus10037544.g/Lus10018692.g/Lus10027321.g/Lus10042864.g/Lus10038640.g/Lus10001908.g/Lus10028165.g/Lus10012444.g/Lus10041482.g/Lus10039180.g	18
GO:0046942	BP	carboxylic acid transport	18/2242	178/32470	0.0670637	0.429924	0.394268	scaffold51.48/Lus10008352.g/Lus10005239.g/Lus10003903.g/Lus10030683.g/Lus10003738.g/Lus10038639.g/Lus10001334.g/Lus10037544.g/Lus10018692.g/Lus10027321.g/Lus10042864.g/Lus10038640.g/Lus10001908.g/Lus10028165.g/Lus10012444.g/Lus10041482.g/Lus10039180.g	18
GO:0000726	BP	non-recombinational repair	3/2242	14/32470	0.0674814	0.429924	0.394268	Lus10005783.g/Lus10006818.g/Lus10015868.g	3
GO:0004030	MF	aldehyde dehydrogenase [NAD(P)+] activity	3/2242	14/32470	0.0674814	0.429924	0.394268	Lus10019387.g/Lus10042724.g/Lus10029684.g	3
GO:0006303	BP	double-strand break repair via nonhomologous end joining	3/2242	14/32470	0.0674814	0.429924	0.394268	Lus10005783.g/Lus10006818.g/Lus10015868.g	3
GO:0007035	BP	vacuolar acidification	3/2242	14/32470	0.0674814	0.429924	0.394268	Lus10010623.g/Lus10033179.g/Lus10010619.g	3
GO:0010099	BP	regulation of photomorphogenesis	3/2242	14/32470	0.0674814	0.429924	0.394268	Lus10002900.g/Lus10035472.g/Lus10002028.g	3
GO:0010162	BP	seed dormancy process	3/2242	14/32470	0.0674814	0.429924	0.394268	Lus10020719.g/Lus10022060.g/Lus10019636.g	3
GO:0016289	MF	CoA hydrolase activity	3/2242	14/32470	0.0674814	0.429924	0.394268	Lus10043253.g/Lus10038717.g/Lus10007334.g	3
GO:0022611	BP	dormancy process	3/2242	14/32470	0.0674814	0.429924	0.394268	Lus10020719.g/Lus10022060.g/Lus10019636.g	3
GO:0045851	BP	pH reduction	3/2242	14/32470	0.0674814	0.429924	0.394268	Lus10010623.g/Lus10033179.g/Lus10010619.g	3
GO:0051452	BP	intracellular pH reduction	3/2242	14/32470	0.0674814	0.429924	0.394268	Lus10010623.g/Lus10033179.g/Lus10010619.g	3
GO:2000030	BP	regulation of response to red or far red light	3/2242	14/32470	0.0674814	0.429924	0.394268	Lus10002900.g/Lus10035472.g/Lus10002028.g	3
GO:0048518	BP	positive regulation of biological process	35/2242	390/32470	0.0681461	0.429924	0.394268	Lus10005134.g/Lus10010733.g/Lus10027969.g/scaffold370.2/Lus10021369.g/Lus10029051.g/Lus10017049.g/Lus10002900.g/Lus10022225.g/Lus10036678.g/Lus10038823.g/Lus10014934.g/Lus10027404.g/Lus10022265.g/Lus10023302.g/Lus10001137.g/Lus10002028.g/Lus10003119.g/Lus10035332.g/Lus10023694.g/Lus10030422.g/Lus10024093.g/Lus10003810.g/Lus10043200.g/Lus10027477.g/Lus10019636.g/Lus10014595.g/Lus10026637.g/Lus1001…	35
GO:0000064	MF	L-ornithine transmembrane transporter activity	1/2242	1/32470	0.0690484	0.429924	0.394268	Lus10037544.g	1
GO:0000700	MF	mismatch base pair DNA N-glycosylase activity	1/2242	1/32470	0.0690484	0.429924	0.394268	Lus10019712.g	1
GO:0000701	MF	purine-specific mismatch base pair DNA N-glycosylase activity	1/2242	1/32470	0.0690484	0.429924	0.394268	Lus10019712.g	1
GO:0003834	MF	beta-carotene 15,15'-monooxygenase activity	1/2242	1/32470	0.0690484	0.429924	0.394268	Lus10026185.g	1
GO:0005227	MF	calcium activated cation channel activity	1/2242	1/32470	0.0690484	0.429924	0.394268	Lus10024477.g	1
GO:0006572	BP	tyrosine catabolic process	1/2242	1/32470	0.0690484	0.429924	0.394268	Lus10042839.g	1
GO:0008808	MF	cardiolipin synthase activity	1/2242	1/32470	0.0690484	0.429924	0.394268	Lus10007662.g	1
GO:0008832	MF	dGTPase activity	1/2242	1/32470	0.0690484	0.429924	0.394268	Lus10029160.g	1
GO:0008908	MF	isochorismatase activity	1/2242	1/32470	0.0690484	0.429924	0.394268	Lus10040988.g	1
GO:0010072	BP	primary shoot apical meristem specification	1/2242	1/32470	0.0690484	0.429924	0.394268	Lus10029876.g	1
GO:0010161	BP	red light signaling pathway	1/2242	1/32470	0.0690484	0.429924	0.394268	Lus10037819.g	1
GO:0010231	BP	maintenance of seed dormancy	1/2242	1/32470	0.0690484	0.429924	0.394268	Lus10020719.g	1
GO:0012502	BP	induction of programmed cell death	1/2242	1/32470	0.0690484	0.429924	0.394268	Lus10010133.g	1
GO:0015822	BP	ornithine transport	1/2242	1/32470	0.0690484	0.429924	0.394268	Lus10037544.g	1
GO:0016793	MF	triphosphoric monoester hydrolase activity	1/2242	1/32470	0.0690484	0.429924	0.394268	Lus10029160.g	1
GO:0017065	MF	single-strand selective uracil DNA N-glycosylase activity	1/2242	1/32470	0.0690484	0.429924	0.394268	Lus10019712.g	1
GO:0018800	MF	5-oxopent-3-ene-1,2,5-tricarboxylate decarboxylase activity	1/2242	1/32470	0.0690484	0.429924	0.394268	Lus10006496.g	1
GO:0019336	BP	phenol-containing compound catabolic process	1/2242	1/32470	0.0690484	0.429924	0.394268	Lus10042839.g	1
GO:0019852	BP	L-ascorbic acid metabolic process	1/2242	1/32470	0.0690484	0.429924	0.394268	Lus10038620.g	1
GO:0019853	BP	L-ascorbic acid biosynthetic process	1/2242	1/32470	0.0690484	0.429924	0.394268	Lus10038620.g	1
GO:0022839	MF	ion gated channel activity	1/2242	1/32470	0.0690484	0.429924	0.394268	Lus10024477.g	1
GO:0030572	MF	phosphatidyltransferase activity	1/2242	1/32470	0.0690484	0.429924	0.394268	Lus10007662.g	1
GO:0030750	MF	putrescine N-methyltransferase activity	1/2242	1/32470	0.0690484	0.429924	0.394268	Lus10019016.g	1
GO:0032048	BP	cardiolipin metabolic process	1/2242	1/32470	0.0690484	0.429924	0.394268	Lus10007662.g	1
GO:0032049	BP	cardiolipin biosynthetic process	1/2242	1/32470	0.0690484	0.429924	0.394268	Lus10007662.g	1
GO:0033319	BP	UDP-D-xylose metabolic process	1/2242	1/32470	0.0690484	0.429924	0.394268	Lus10005450.g	1
GO:0033320	BP	UDP-D-xylose biosynthetic process	1/2242	1/32470	0.0690484	0.429924	0.394268	Lus10005450.g	1
GO:0033611	BP	oxalate catabolic process	1/2242	1/32470	0.0690484	0.429924	0.394268	Lus10027477.g	1
GO:0047810	MF	D-alanine:2-oxoglutarate aminotransferase activity	1/2242	1/32470	0.0690484	0.429924	0.394268	Lus10013676.g	1
GO:0047874	MF	dolichyldiphosphatase activity	1/2242	1/32470	0.0690484	0.429924	0.394268	Lus10026489.g	1
GO:0050203	MF	oxalate-CoA ligase activity	1/2242	1/32470	0.0690484	0.429924	0.394268	Lus10027477.g	1
GO:0050265	MF	RNA uridylyltransferase activity	1/2242	1/32470	0.0690484	0.429924	0.394268	Lus10001012.g	1
GO:0070635	MF	nicotinamide riboside hydrolase activity	1/2242	1/32470	0.0690484	0.429924	0.394268	Lus10019712.g	1
GO:0070636	MF	nicotinic acid riboside hydrolase activity	1/2242	1/32470	0.0690484	0.429924	0.394268	Lus10019712.g	1
GO:0070694	MF	deoxyribonucleoside 5'-monophosphate N-glycosidase activity	1/2242	1/32470	0.0690484	0.429924	0.394268	Lus10019712.g	1
GO:0071491	BP	cellular response to red light	1/2242	1/32470	0.0690484	0.429924	0.394268	Lus10037819.g	1
GO:0080165	BP	callose deposition in phloem sieve plate	1/2242	1/32470	0.0690484	0.429924	0.394268	Lus10007372.g	1
GO:0097437	BP	maintenance of dormancy	1/2242	1/32470	0.0690484	0.429924	0.394268	Lus10020719.g	1
GO:1901999	BP	homogentisate metabolic process	1/2242	1/32470	0.0690484	0.429924	0.394268	Lus10042839.g	1
GO:1902000	BP	homogentisate catabolic process	1/2242	1/32470	0.0690484	0.429924	0.394268	Lus10042839.g	1
GO:1903352	BP	L-ornithine transmembrane transport	1/2242	1/32470	0.0690484	0.429924	0.394268	Lus10037544.g	1
GO:0010033	BP	response to organic substance	73/2242	888/32470	0.0693579	0.431038	0.39529	Lus10042731.g/Lus10011824.g/Lus10013155.g/Lus10003660.g/Lus10027969.g/scaffold732.45/Lus10007283.g/Lus10021190.g/Lus10043186.g/Lus10005652.g/Lus10021369.g/Lus10020719.g/scaffold1202.11/Lus10005619.g/Lus10000659.g/Lus10028001.g/Lus10017049.g/Lus10002900.g/Lus10036667.g/Lus10021098.g/Lus10007849.g/Lus10037032.g/Lus10014657.g/Lus10011929.g/Lus10009040.g/Lus10020193.g/Lus10022060.g/Lus10017977.g/Lus1…	73
GO:0031328	BP	positive regulation of cellular biosynthetic process	16/2242	155/32470	0.0698467	0.432491	0.396623	Lus10005134.g/scaffold370.2/Lus10021369.g/Lus10029051.g/Lus10017049.g/Lus10022225.g/Lus10038823.g/Lus10014934.g/Lus10027404.g/Lus10003119.g/Lus10030422.g/Lus10003810.g/Lus10026637.g/Lus10023619.g/Lus10041126.g/Lus10017289.g	16
GO:0004867	MF	serine-type endopeptidase inhibitor activity	4/2242	23/32470	0.070116	0.432491	0.396623	Lus10014740.g/Lus10032754.g/Lus10002792.g/Lus10005087.g	4
GO:0006817	BP	phosphate ion transport	4/2242	23/32470	0.070116	0.432491	0.396623	Lus10033886.g/Lus10003560.g/Lus10011826.g/scaffold610.41	4
GO:0010431	BP	seed maturation	4/2242	23/32470	0.070116	0.432491	0.396623	Lus10020719.g/Lus10022060.g/Lus10000672.g/Lus10019636.g	4
GO:0000988	MF	obsolete transcription factor activity, protein binding	18/2242	180/32470	0.0729677	0.446827	0.40977	Lus10010733.g/scaffold732.45/Lus10035472.g/Lus10011929.g/Lus10036678.g/Lus10038823.g/Lus10039911.g/Lus10014934.g/Lus10039562.g/Lus10027639.g/Lus10013170.g/Lus10009717.g/Lus10008129.g/Lus10022418.g/Lus10031087.g/Lus10021650.g/Lus10013166.g/Lus10027648.g	18
GO:0009308	BP	amine metabolic process	16/2242	156/32470	0.0730793	0.446827	0.40977	Lus10003845.g/Lus10024568.g/Lus10026471.g/Lus10003398.g/Lus10019016.g/Lus10024289.g/Lus10040973.g/scaffold380.27/Lus10019712.g/Lus10035083.g/Lus10018038.g/Lus10019822.g/Lus10030629.g/Lus10014091.g/Lus10029843.g/Lus10014092.g	16
GO:0015294	MF	solute:cation symporter activity	12/2242	109/32470	0.0731172	0.446827	0.40977	Lus10033814.g/Lus10025800.g/Lus10029966.g/Lus10035354.g/Lus10011288.g/Lus10029970.g/Lus10028303.g/Lus10041748.g/Lus10029962.g/Lus10018956.g/Lus10040482.g/Lus10005870.g	12
GO:0032879	BP	regulation of localization	12/2242	109/32470	0.0731172	0.446827	0.40977	Lus10002478.g/Lus10016487.g/Lus10029873.g/Lus10018594.g/Lus10040744.g/Lus10001254.g/Lus10020672.g/Lus10009598.g/Lus10037826.g/Lus10002674.g/Lus10023228.g/Lus10040349.g	12
GO:0034219	BP	carbohydrate transmembrane transport	12/2242	109/32470	0.0731172	0.446827	0.40977	Lus10033814.g/Lus10029966.g/Lus10035354.g/Lus10029605.g/Lus10011288.g/Lus10029970.g/Lus10028303.g/Lus10041748.g/Lus10029962.g/Lus10018956.g/Lus10040482.g/Lus10005870.g	12
GO:0006595	BP	polyamine metabolic process	5/2242	33/32470	0.0740087	0.449776	0.412474	Lus10003398.g/Lus10019016.g/Lus10040973.g/Lus10035083.g/Lus10030629.g	5
GO:0045047	BP	protein targeting to ER	5/2242	33/32470	0.0740087	0.449776	0.412474	scaffold43.21/Lus10037011.g/Lus10015793.g/Lus10017891.g/Lus10040614.g	5
GO:0072599	BP	establishment of protein localization to endoplasmic reticulum	5/2242	33/32470	0.0740087	0.449776	0.412474	scaffold43.21/Lus10037011.g/Lus10015793.g/Lus10017891.g/Lus10040614.g	5
GO:0048580	BP	regulation of post-embryonic development	14/2242	133/32470	0.0756427	0.458862	0.420806	Lus10021369.g/Lus10005106.g/Lus10017223.g/Lus10000659.g/Lus10028001.g/Lus10017049.g/Lus10002900.g/Lus10035472.g/Lus10037032.g/Lus10027404.g/Lus10002028.g/Lus10007459.g/Lus10043200.g/Lus10027477.g	14
GO:0016877	MF	ligase activity, forming carbon-sulfur bonds	7/2242	54/32470	0.0768664	0.461185	0.422936	Lus10016083.g/Lus10037735.g/Lus10016870.g/Lus10016869.g/Lus10027477.g/Lus10031862.g/Lus10042707.g	7
GO:0034754	BP	cellular hormone metabolic process	7/2242	54/32470	0.0768664	0.461185	0.422936	Lus10003845.g/Lus10026471.g/Lus10024289.g/scaffold380.27/Lus10034253.g/Lus10019712.g/Lus10018038.g	7
GO:0048731	BP	system development	61/2242	734/32470	0.0768914	0.461185	0.422936	Lus10000310.g/Lus10015754.g/Lus10030446.g/Lus10016056.g/scaffold272.125/Lus10027969.g/Lus10011335.g/Lus10021369.g/Lus10041310.g/Lus10020719.g/Lus10005106.g/Lus10008098.g/Lus10017223.g/Lus10000659.g/Lus10028001.g/Lus10017049.g/Lus10035472.g/Lus10022225.g/Lus10002500.g/Lus10031826.g/Lus10007231.g/Lus10029876.g/Lus10026617.g/Lus10007849.g/Lus10037032.g/Lus10022060.g/Lus10035662.g/Lus10024927.g/Lus10…	61
GO:0004326	MF	tetrahydrofolylpolyglutamate synthase activity	2/2242	7/32470	0.0793175	0.461185	0.422936	Lus10004694.g/Lus10040261.g	2
GO:0004657	MF	proline dehydrogenase activity	2/2242	7/32470	0.0793175	0.461185	0.422936	Lus10034095.g/Lus10034094.g	2
GO:0006562	BP	proline catabolic process	2/2242	7/32470	0.0793175	0.461185	0.422936	Lus10034095.g/Lus10034094.g	2
GO:0008466	MF	glycogenin glucosyltransferase activity	2/2242	7/32470	0.0793175	0.461185	0.422936	Lus10034664.g/Lus10017868.g	2
GO:0010187	BP	negative regulation of seed germination	2/2242	7/32470	0.0793175	0.461185	0.422936	Lus10021369.g/Lus10017049.g	2
GO:0016530	MF	metallochaperone activity	2/2242	7/32470	0.0793175	0.461185	0.422936	Lus10037356.g/Lus10012635.g	2
GO:0017157	BP	regulation of exocytosis	2/2242	7/32470	0.0793175	0.461185	0.422936	Lus10002478.g/Lus10001254.g	2
GO:0031386	MF	protein tag	2/2242	7/32470	0.0793175	0.461185	0.422936	Lus10002228.g/Lus10023188.g	2
GO:0031537	BP	regulation of anthocyanin metabolic process	2/2242	7/32470	0.0793175	0.461185	0.422936	Lus10002900.g/Lus10002028.g	2
GO:0032447	BP	protein urmylation	2/2242	7/32470	0.0793175	0.461185	0.422936	Lus10009739.g/Lus10041378.g	2
GO:0032451	MF	demethylase activity	2/2242	7/32470	0.0793175	0.461185	0.422936	Lus10026246.g/Lus10042424.g	2
GO:0043091	BP	L-arginine transport	2/2242	7/32470	0.0793175	0.461185	0.422936	Lus10037544.g/Lus10018692.g	2
GO:0043092	BP	amino acid import across plasma membrane	2/2242	7/32470	0.0793175	0.461185	0.422936	Lus10037544.g/Lus10018692.g	2
GO:0051046	BP	regulation of secretion	2/2242	7/32470	0.0793175	0.461185	0.422936	Lus10002478.g/Lus10001254.g	2
GO:0052731	MF	phosphocholine phosphatase activity	2/2242	7/32470	0.0793175	0.461185	0.422936	Lus10001479.g/Lus10037650.g	2
GO:0052732	MF	phosphoethanolamine phosphatase activity	2/2242	7/32470	0.0793175	0.461185	0.422936	Lus10001479.g/Lus10037650.g	2
GO:0090467	BP	L-arginine import across plasma membrane	2/2242	7/32470	0.0793175	0.461185	0.422936	Lus10037544.g/Lus10018692.g	2
GO:1902023	BP	L-arginine transport	2/2242	7/32470	0.0793175	0.461185	0.422936	Lus10037544.g/Lus10018692.g	2
GO:1902395	BP	regulation of 1-deoxy-D-xylulose-5-phosphate synthase activity	2/2242	7/32470	0.0793175	0.461185	0.422936	Lus10002356.g/Lus10003149.g	2
GO:1903530	BP	regulation of secretion by cell	2/2242	7/32470	0.0793175	0.461185	0.422936	Lus10002478.g/Lus10001254.g	2
GO:0015079	MF	potassium ion transmembrane transporter activity	11/2242	99/32470	0.0795	0.461185	0.422936	scaffold156.172/Lus10005221.g/Lus10032154.g/Lus10018324.g/Lus10019442.g/Lus10031320.g/Lus10031891.g/Lus10035765.g/Lus10014531.g/Lus10037904.g/Lus10043298.g	11
GO:0004630	MF	phospholipase D activity	4/2242	24/32470	0.079736	0.461185	0.422936	Lus10033706.g/Lus10031634.g/Lus10029873.g/Lus10020672.g	4
GO:0010277	MF	chlorophyllide a oxygenase [overall] activity	4/2242	24/32470	0.079736	0.461185	0.422936	Lus10026246.g/Lus10041348.g/Lus10042424.g/Lus10037370.g	4
GO:0000220	CC	vacuolar proton-transporting V-type ATPase, V0 domain	3/2242	15/32470	0.0801726	0.461185	0.422936	Lus10010623.g/Lus10033179.g/Lus10010619.g	3
GO:0006020	BP	inositol metabolic process	3/2242	15/32470	0.0801726	0.461185	0.422936	Lus10000692.g/Lus10006198.g/Lus10019671.g	3
GO:0030915	CC	Smc5-Smc6 complex	3/2242	15/32470	0.0801726	0.461185	0.422936	Lus10023694.g/Lus10027219.g/Lus10029476.g	3
GO:0071804	BP	potassium ion transport	6/2242	44/32470	0.0803579	0.461185	0.422936	scaffold156.172/Lus10032154.g/Lus10018324.g/Lus10003611.g/Lus10014531.g/Lus10037904.g	6
GO:0071805	BP	potassium ion transmembrane transport	6/2242	44/32470	0.0803579	0.461185	0.422936	scaffold156.172/Lus10032154.g/Lus10018324.g/Lus10003611.g/Lus10014531.g/Lus10037904.g	6
GO:0009311	BP	oligosaccharide metabolic process	10/2242	88/32470	0.0815126	0.466999	0.428269	Lus10004340.g/Lus10010308.g/Lus10013417.g/Lus10001468.g/Lus10005559.g/Lus10028922.g/Lus10020506.g/Lus10012990.g/Lus10021805.g/Lus10007372.g	10
GO:0032392	BP	DNA geometric change	5/2242	34/32470	0.0820684	0.468557	0.429697	Lus10005783.g/Lus10028385.g/Lus10006818.g/Lus10034749.g/Lus10015868.g	5
GO:0032508	BP	DNA duplex unwinding	5/2242	34/32470	0.0820684	0.468557	0.429697	Lus10005783.g/Lus10028385.g/Lus10006818.g/Lus10034749.g/Lus10015868.g	5
GO:2000026	BP	regulation of multicellular organismal development	17/2242	171/32470	0.0830166	0.472173	0.433013	Lus10021369.g/Lus10005106.g/Lus10017223.g/Lus10000659.g/Lus10028001.g/Lus10017049.g/Lus10002900.g/Lus10035472.g/Lus10007231.g/Lus10037032.g/Lus10027404.g/Lus10002028.g/Lus10041721.g/Lus10007459.g/Lus10043200.g/Lus10027477.g/Lus10019636.g	17
GO:0009891	BP	positive regulation of biosynthetic process	16/2242	159/32470	0.0833647	0.472173	0.433013	Lus10005134.g/scaffold370.2/Lus10021369.g/Lus10029051.g/Lus10017049.g/Lus10022225.g/Lus10038823.g/Lus10014934.g/Lus10027404.g/Lus10003119.g/Lus10030422.g/Lus10003810.g/Lus10026637.g/Lus10023619.g/Lus10041126.g/Lus10017289.g	16
GO:0006970	BP	response to osmotic stress	15/2242	147/32470	0.0834508	0.472173	0.433013	Lus10000310.g/Lus10015754.g/Lus10013155.g/Lus10011335.g/Lus10029759.g/Lus10000659.g/Lus10028001.g/Lus10037032.g/Lus10016273.g/Lus10005934.g/Lus10043181.g/Lus10003611.g/Lus10018989.g/Lus10014795.g/Lus10033840.g	15
GO:0071215	BP	cellular response to abscisic acid stimulus	15/2242	147/32470	0.0834508	0.472173	0.433013	Lus10042731.g/Lus10011824.g/Lus10021190.g/Lus10020719.g/scaffold1202.11/Lus10005619.g/Lus10000659.g/Lus10028001.g/Lus10036667.g/Lus10037032.g/Lus10014657.g/Lus10017251.g/Lus10041093.g/Lus10015009.g/Lus10035801.g	15
GO:0097306	BP	cellular response to alcohol	15/2242	147/32470	0.0834508	0.472173	0.433013	Lus10042731.g/Lus10011824.g/Lus10021190.g/Lus10020719.g/scaffold1202.11/Lus10005619.g/Lus10000659.g/Lus10028001.g/Lus10036667.g/Lus10037032.g/Lus10014657.g/Lus10017251.g/Lus10041093.g/Lus10015009.g/Lus10035801.g	15
GO:0009063	BP	cellular amino acid catabolic process	8/2242	66/32470	0.0837034	0.472173	0.433013	Lus10014658.g/Lus10028135.g/Lus10042839.g/Lus10034095.g/Lus10034094.g/Lus10019822.g/Lus10014091.g/Lus10014092.g	8
GO:0021700	BP	developmental maturation	8/2242	66/32470	0.0837034	0.472173	0.433013	Lus10030446.g/Lus10020719.g/Lus10026617.g/Lus10022060.g/Lus10014765.g/Lus10000672.g/Lus10019636.g/Lus10037156.g	8
GO:0015077	MF	monovalent inorganic cation transmembrane transporter activity	31/2242	347/32470	0.0855429	0.481726	0.441774	Lus10004819.g/scaffold156.172/Lus10035507.g/Lus10010618.g/Lus10026946.g/Lus10005221.g/Lus10032154.g/Lus10018324.g/Lus10040674.g/Lus10019442.g/Lus10026944.g/Lus10010623.g/Lus10039131.g/Lus10031320.g/Lus10002490.g/Lus10005934.g/Lus10033179.g/Lus10031891.g/Lus10033934.g/Lus10015268.g/Lus10035765.g/Lus10010619.g/Lus10018989.g/Lus10014531.g/Lus10042445.g/Lus10003259.g/Lus10033382.g/Lus10037904.g/Lus10…	31
GO:0048522	BP	positive regulation of cellular process	29/2242	322/32470	0.0868281	0.488131	0.447648	Lus10005134.g/Lus10010733.g/Lus10027969.g/scaffold370.2/Lus10021369.g/Lus10029051.g/Lus10017049.g/Lus10022225.g/Lus10036678.g/Lus10038823.g/Lus10014934.g/Lus10027404.g/Lus10022265.g/Lus10001137.g/Lus10003119.g/Lus10035332.g/Lus10023694.g/Lus10030422.g/Lus10024093.g/Lus10003810.g/Lus10019636.g/Lus10014595.g/Lus10026637.g/Lus10023619.g/Lus10026104.g/Lus10041126.g/Lus10007022.g/Lus10017289.g/Lus1001…	29
GO:0031324	BP	negative regulation of cellular metabolic process	24/2242	259/32470	0.0875129	0.48902	0.448463	Lus10005134.g/scaffold732.45/scaffold370.2/Lus10021767.g/Lus10012202.g/Lus10008007.g/Lus10019348.g/Lus10007849.g/Lus10021940.g/Lus10011929.g/Lus10009351.g/Lus10039911.g/Lus10004759.g/Lus10001012.g/Lus10043200.g/Lus10027639.g/Lus10017724.g/Lus10008129.g/Lus10024485.g/Lus10021650.g/Lus10013166.g/Lus10027648.g/Lus10041718.g/Lus10043433.g	24
GO:0016703	MF	oxidoreductase activity, acting on single donors with incorporation of molecular oxygen, incorporation of one atom of oxygen (internal monooxygenases or internal mixed function oxidases)	6/2242	45/32470	0.087579	0.48902	0.448463	Lus10026246.g/Lus10041348.g/Lus10042424.g/Lus10037370.g/Lus10005390.g/Lus10012280.g	6
GO:0047085	MF	hydroxyphenylacetonitrile 2-monooxygenase activity	6/2242	45/32470	0.087579	0.48902	0.448463	Lus10030189.g/Lus10040120.g/Lus10017676.g/Lus10018263.g/Lus10024315.g/Lus10016601.g	6
GO:0050592	MF	4-hydroxyphenylacetaldehyde oxime monooxygenase activity	6/2242	45/32470	0.087579	0.48902	0.448463	Lus10030189.g/Lus10040120.g/Lus10017676.g/Lus10018263.g/Lus10024315.g/Lus10016601.g	6
GO:0051537	MF	2 iron, 2 sulfur cluster binding	9/2242	78/32470	0.0883961	0.492749	0.451883	Lus10026246.g/Lus10041348.g/Lus10042424.g/Lus10032689.g/Lus10037370.g/Lus10034306.g/Lus10043430.g/Lus10008571.g/Lus10034144.g	9
GO:0022414	BP	reproductive process	62/2242	755/32470	0.0891975	0.495672	0.454563	Lus10011013.g/Lus10001009.g/Lus10030446.g/Lus10016056.g/scaffold272.125/Lus10027969.g/Lus10021369.g/Lus10041310.g/Lus10020719.g/Lus10005106.g/Lus10017223.g/Lus10000659.g/Lus10028001.g/Lus10017049.g/Lus10040415.g/Lus10035472.g/Lus10002500.g/Lus10031826.g/Lus10029876.g/Lus10026617.g/Lus10037032.g/Lus10022060.g/Lus10041143.g/Lus10035662.g/Lus10006746.g/Lus10004646.g/Lus10041348.g/Lus10022636.g/Lus10…	62
GO:0009902	BP	chloroplast relocation	4/2242	25/32470	0.0899719	0.495672	0.454563	Lus10016626.g/Lus10022531.g/Lus10017614.g/Lus10033572.g	4
GO:0009933	BP	meristem structural organization	4/2242	25/32470	0.0899719	0.495672	0.454563	Lus10008098.g/Lus10029876.g/Lus10000639.g/Lus10000285.g	4
GO:0019750	BP	chloroplast localization	4/2242	25/32470	0.0899719	0.495672	0.454563	Lus10016626.g/Lus10022531.g/Lus10017614.g/Lus10033572.g	4
GO:0051644	BP	plastid localization	4/2242	25/32470	0.0899719	0.495672	0.454563	Lus10016626.g/Lus10022531.g/Lus10017614.g/Lus10033572.g	4
GO:0051667	BP	establishment of plastid localization	4/2242	25/32470	0.0899719	0.495672	0.454563	Lus10016626.g/Lus10022531.g/Lus10017614.g/Lus10033572.g	4
GO:0072503	BP	cellular divalent inorganic cation homeostasis	4/2242	25/32470	0.0899719	0.495672	0.454563	Lus10016487.g/Lus10040744.g/Lus10009598.g/Lus10002674.g	4
GO:0034637	BP	cellular carbohydrate biosynthetic process	24/2242	260/32470	0.0904053	0.497229	0.455992	Lus10032415.g/Lus10027725.g/Lus10012264.g/Lus10023057.g/Lus10023553.g/Lus10000692.g/Lus10034595.g/Lus10019671.g/Lus10005559.g/Lus10011360.g/Lus10020750.g/Lus10016012.g/Lus10037469.g/Lus10012990.g/Lus10021805.g/Lus10034664.g/Lus10010268.g/Lus10023056.g/Lus10040437.g/Lus10007327.g/Lus10017868.g/Lus10039607.g/Lus10037026.g/Lus10029049.g	24
GO:0016411	MF	acylglycerol O-acyltransferase activity	5/2242	35/32470	0.0905728	0.497322	0.456077	Lus10014075.g/Lus10019840.g/Lus10039135.g/Lus10002556.g/Lus10027375.g	5
GO:0018105	BP	peptidyl-serine phosphorylation	11/2242	102/32470	0.0935897	0.508308	0.466152	Lus10011824.g/Lus10021190.g/scaffold1202.11/Lus10005619.g/Lus10036667.g/Lus10014657.g/Lus10017251.g/Lus10041093.g/Lus10015009.g/Lus10011113.g/Lus10037621.g	11
GO:0032270	BP	positive regulation of cellular protein metabolic process	11/2242	102/32470	0.0935897	0.508308	0.466152	Lus10010733.g/Lus10036678.g/Lus10022265.g/Lus10001137.g/Lus10035332.g/Lus10030422.g/Lus10024093.g/Lus10026637.g/Lus10023619.g/Lus10026104.g/Lus10007022.g	11
GO:0051247	BP	positive regulation of protein metabolic process	11/2242	102/32470	0.0935897	0.508308	0.466152	Lus10010733.g/Lus10036678.g/Lus10022265.g/Lus10001137.g/Lus10035332.g/Lus10030422.g/Lus10024093.g/Lus10026637.g/Lus10023619.g/Lus10026104.g/Lus10007022.g	11
GO:0004712	MF	protein serine/threonine/tyrosine kinase activity	3/2242	16/32470	0.093806	0.508308	0.466152	Lus10022265.g/Lus10001137.g/Lus10009394.g	3
GO:0016647	MF	oxidoreductase activity, acting on the CH-NH group of donors, oxygen as acceptor	3/2242	16/32470	0.093806	0.508308	0.466152	Lus10026933.g/Lus10020132.g/Lus10042168.g	3
GO:0019905	MF	syntaxin binding	3/2242	16/32470	0.093806	0.508308	0.466152	Lus10002478.g/Lus10012211.g/Lus10001254.g	3
GO:0046283	BP	anthocyanin-containing compound metabolic process	3/2242	16/32470	0.093806	0.508308	0.466152	Lus10002900.g/Lus10002028.g/Lus10035332.g	3
GO:0046365	BP	monosaccharide catabolic process	3/2242	16/32470	0.093806	0.508308	0.466152	Lus10034595.g/Lus10015715.g/Lus10031877.g	3
GO:0051235	BP	maintenance of location	9/2242	79/32470	0.0939795	0.508414	0.466249	Lus10035730.g/Lus10016487.g/Lus10034734.g/Lus10040744.g/Lus10009598.g/Lus10022763.g/Lus10032127.g/Lus10003146.g/Lus10002674.g	9
GO:0009690	BP	cytokinin metabolic process	6/2242	46/32470	0.0951424	0.513863	0.471246	Lus10003845.g/Lus10026471.g/Lus10024289.g/scaffold380.27/Lus10019712.g/Lus10018038.g	6
GO:0005261	MF	cation channel activity	8/2242	68/32470	0.0957391	0.516154	0.473347	Lus10005221.g/Lus10018594.g/Lus10019442.g/Lus10024477.g/Lus10031320.g/Lus10031891.g/Lus10037904.g/Lus10043298.g	8
GO:0009812	BP	flavonoid metabolic process	20/2242	212/32470	0.0970302	0.516154	0.473347	Lus10024583.g/scaffold1247.34/Lus10028572.g/Lus10002900.g/Lus10042262.g/scaffold274.9/Lus10039277.g/Lus10002028.g/Lus10035332.g/Lus10003311.g/Lus10031819.g/Lus10014437.g/Lus10019833.g/Lus10042261.g/Lus10013500.g/Lus10019808.g/Lus10014105.g/Lus10023939.g/Lus10018878.g/Lus10041508.g	20
GO:0048827	BP	phyllome development	20/2242	212/32470	0.0970302	0.516154	0.473347	Lus10000310.g/Lus10015754.g/Lus10030446.g/scaffold272.125/Lus10011335.g/Lus10022225.g/Lus10026617.g/Lus10037032.g/Lus10024927.g/Lus10004646.g/Lus10022636.g/Lus10041794.g/Lus10000639.g/Lus10027404.g/Lus10023694.g/Lus10043200.g/Lus10012657.g/Lus10019636.g/Lus10037156.g/Lus10000285.g	20
GO:0008509	MF	anion transmembrane transporter activity	29/2242	326/32470	0.0973854	0.516154	0.473347	Lus10000673.g/scaffold51.48/Lus10027725.g/Lus10008352.g/Lus10005239.g/Lus10024614.g/Lus10003903.g/Lus10030683.g/Lus10032252.g/Lus10003738.g/Lus10038639.g/Lus10029605.g/Lus10001334.g/Lus10037544.g/Lus10018692.g/Lus10004430.g/Lus10027321.g/scaffold115.10/Lus10027727.g/Lus10042864.g/Lus10033637.g/Lus10038640.g/Lus10001908.g/Lus10002674.g/Lus10028165.g/Lus10012444.g/Lus10041482.g/Lus10008572.g/Lus100…	29
GO:0000003	BP	reproduction	62/2242	760/32470	0.0978303	0.516154	0.473347	Lus10011013.g/Lus10001009.g/Lus10030446.g/Lus10016056.g/scaffold272.125/Lus10027969.g/Lus10021369.g/Lus10041310.g/Lus10020719.g/Lus10005106.g/Lus10017223.g/Lus10000659.g/Lus10028001.g/Lus10017049.g/Lus10040415.g/Lus10035472.g/Lus10002500.g/Lus10031826.g/Lus10029876.g/Lus10026617.g/Lus10037032.g/Lus10022060.g/Lus10041143.g/Lus10035662.g/Lus10006746.g/Lus10004646.g/Lus10041348.g/Lus10022636.g/Lus10…	62
GO:0018209	BP	peptidyl-serine modification	11/2242	103/32470	0.0985997	0.516154	0.473347	Lus10011824.g/Lus10021190.g/scaffold1202.11/Lus10005619.g/Lus10036667.g/Lus10014657.g/Lus10017251.g/Lus10041093.g/Lus10015009.g/Lus10011113.g/Lus10037621.g	11
GO:0016053	BP	organic acid biosynthetic process	51/2242	614/32470	0.0987049	0.516154	0.473347	Lus10004697.g/Lus10014407.g/Lus10040264.g/Lus10014658.g/Lus10039278.g/Lus10001018.g/Lus10002191.g/Lus10001016.g/Lus10008521.g/C8303341.1/Lus10004696.g/Lus10006058.g/Lus10040263.g/Lus10001019.g/Lus10027515.g/Lus10029955.g/Lus10018594.g/Lus10037544.g/Lus10004694.g/scaffold464.140/Lus10014765.g/Lus10028171.g/Lus10040262.g/Lus10040739.g/Lus10030158.g/Lus10012536.g/Lus10015222.g/Lus10039401.g/Lus10021…	51
GO:0046394	BP	carboxylic acid biosynthetic process	51/2242	614/32470	0.0987049	0.516154	0.473347	Lus10004697.g/Lus10014407.g/Lus10040264.g/Lus10014658.g/Lus10039278.g/Lus10001018.g/Lus10002191.g/Lus10001016.g/Lus10008521.g/C8303341.1/Lus10004696.g/Lus10006058.g/Lus10040263.g/Lus10001019.g/Lus10027515.g/Lus10029955.g/Lus10018594.g/Lus10037544.g/Lus10004694.g/scaffold464.140/Lus10014765.g/Lus10028171.g/Lus10040262.g/Lus10040739.g/Lus10030158.g/Lus10012536.g/Lus10015222.g/Lus10039401.g/Lus10021…	51
GO:0010119	BP	regulation of stomatal movement	5/2242	36/32470	0.0995124	0.516154	0.473347	Lus10031826.g/Lus10018594.g/Lus10035332.g/Lus10007459.g/Lus10035765.g	5
GO:0080134	BP	regulation of response to stress	12/2242	115/32470	0.0995439	0.516154	0.473347	scaffold732.45/Lus10021940.g/Lus10011929.g/Lus10030599.g/Lus10039911.g/Lus10023302.g/Lus10030597.g/Lus10030891.g/Lus10027639.g/Lus10008129.g/Lus10013166.g/Lus10027648.g	12
GO:0006576	BP	cellular biogenic amine metabolic process	9/2242	80/32470	0.0997638	0.516154	0.473347	Lus10003398.g/Lus10019016.g/Lus10040973.g/Lus10035083.g/Lus10019822.g/Lus10030629.g/Lus10014091.g/Lus10029843.g/Lus10014092.g	9
GO:0072507	BP	divalent inorganic cation homeostasis	4/2242	26/32470	0.100801	0.516154	0.473347	Lus10016487.g/Lus10040744.g/Lus10009598.g/Lus10002674.g	4
GO:0000996	MF	sigma factor activity	2/2242	8/32470	0.101041	0.516154	0.473347	Lus10038823.g/Lus10014934.g	2
GO:0001077	MF	DNA-binding transcription activator activity, RNA polymerase II-specific	2/2242	8/32470	0.101041	0.516154	0.473347	Lus10003119.g/Lus10041126.g	2
GO:0003959	MF	NADPH dehydrogenase activity	2/2242	8/32470	0.101041	0.516154	0.473347	Lus10013218.g/scaffold372.16	2
GO:0004014	MF	adenosylmethionine decarboxylase activity	2/2242	8/32470	0.101041	0.516154	0.473347	Lus10040973.g/Lus10035083.g	2
GO:0004128	MF	cytochrome-b5 reductase activity, acting on NAD(P)H	2/2242	8/32470	0.101041	0.516154	0.473347	Lus10034869.g/Lus10033405.g	2
GO:0006557	BP	S-adenosylmethioninamine biosynthetic process	2/2242	8/32470	0.101041	0.516154	0.473347	Lus10040973.g/Lus10035083.g	2
GO:0006559	BP	L-phenylalanine catabolic process	2/2242	8/32470	0.101041	0.516154	0.473347	Lus10028135.g/Lus10042839.g	2
GO:0006624	BP	vacuolar protein processing	2/2242	8/32470	0.101041	0.516154	0.473347	Lus10024599.g/Lus10024446.g	2
GO:0008239	MF	dipeptidyl-peptidase activity	2/2242	8/32470	0.101041	0.516154	0.473347	Lus10011603.g/Lus10041817.g	2
GO:0008728	MF	GTP diphosphokinase activity	2/2242	8/32470	0.101041	0.516154	0.473347	Lus10001862.g/Lus10037672.g	2
GO:0010322	BP	regulation of isopentenyl diphosphate biosynthetic process, methylerythritol 4-phosphate pathway	2/2242	8/32470	0.101041	0.516154	0.473347	Lus10002356.g/Lus10003149.g	2
GO:0016987	MF	sigma factor activity	2/2242	8/32470	0.101041	0.516154	0.473347	Lus10038823.g/Lus10014934.g	2
GO:0019058	BP	viral life cycle	2/2242	8/32470	0.101041	0.516154	0.473347	Lus10030942.g/Lus10040105.g	2
GO:0019079	BP	viral genome replication	2/2242	8/32470	0.101041	0.516154	0.473347	Lus10030942.g/Lus10040105.g	2
GO:0043406	BP	positive regulation of MAP kinase activity	2/2242	8/32470	0.101041	0.516154	0.473347	Lus10022265.g/Lus10001137.g	2
GO:0043410	BP	positive regulation of MAPK cascade	2/2242	8/32470	0.101041	0.516154	0.473347	Lus10022265.g/Lus10001137.g	2
GO:0046499	BP	S-adenosylmethioninamine metabolic process	2/2242	8/32470	0.101041	0.516154	0.473347	Lus10040973.g/Lus10035083.g	2
GO:0048508	BP	embryonic meristem development	2/2242	8/32470	0.101041	0.516154	0.473347	Lus10029876.g/Lus10004646.g	2
GO:0071071	BP	regulation of phospholipid biosynthetic process	2/2242	8/32470	0.101041	0.516154	0.473347	Lus10002356.g/Lus10003149.g	2
GO:0098599	MF	palmitoyl hydrolase activity	2/2242	8/32470	0.101041	0.516154	0.473347	Lus10026054.g/Lus10014347.g	2
GO:1902222	BP	erythrose 4-phosphate/phosphoenolpyruvate family amino acid catabolic process	2/2242	8/32470	0.101041	0.516154	0.473347	Lus10028135.g/Lus10042839.g	2
GO:1902533	BP	positive regulation of intracellular signal transduction	2/2242	8/32470	0.101041	0.516154	0.473347	Lus10022265.g/Lus10001137.g	2
GO:1903725	BP	regulation of phospholipid metabolic process	2/2242	8/32470	0.101041	0.516154	0.473347	Lus10002356.g/Lus10003149.g	2
GO:0016311	BP	dephosphorylation	27/2242	302/32470	0.101943	0.519957	0.476835	Lus10001832.g/Lus10034965.g/Lus10012962.g/Lus10009210.g/Lus10040738.g/Lus10019017.g/Lus10003399.g/Lus10006485.g/Lus10004703.g/Lus10016493.g/Lus10040270.g/Lus10002500.g/Lus10021940.g/Lus10005405.g/Lus10038058.g/scaffold196.293/Lus10041861.g/Lus10026908.g/Lus10001976.g/Lus10034062.g/Lus10022786.g/Lus10031396.g/Lus10020671.g/Lus10022074.g/Lus10009993.g/Lus10037832.g/Lus10036689.g	27
GO:0051254	BP	positive regulation of RNA metabolic process	14/2242	140/32470	0.104162	0.530455	0.486462	Lus10005134.g/scaffold370.2/Lus10021369.g/Lus10029051.g/Lus10017049.g/Lus10022225.g/Lus10038823.g/Lus10014934.g/Lus10027404.g/Lus10003119.g/Lus10003810.g/Lus10023619.g/Lus10041126.g/Lus10017289.g	14
GO:0048437	BP	floral organ development	9/2242	81/32470	0.105748	0.5377	0.493106	scaffold272.125/Lus10027969.g/Lus10004646.g/Lus10041794.g/Lus10027404.g/Lus10038582.g/Lus10043200.g/Lus10019636.g/Lus10037882.g	9
GO:0010605	BP	negative regulation of macromolecule metabolic process	34/2242	394/32470	0.106573	0.541062	0.496189	Lus10005134.g/scaffold732.45/scaffold370.2/Lus10021767.g/Lus10012202.g/Lus10008007.g/Lus10019348.g/Lus10007849.g/Lus10021940.g/Lus10011929.g/Lus10009351.g/Lus10000951.g/Lus10039911.g/Lus10004759.g/Lus10001012.g/Lus10012965.g/Lus10043200.g/Lus10029713.g/Lus10037136.g/Lus10021918.g/Lus10027639.g/Lus10018061.g/Lus10021917.g/Lus10017724.g/Lus10023619.g/Lus10008129.g/Lus10019588.g/Lus10024485.g/Lus100…	34
GO:0000041	BP	transition metal ion transport	10/2242	93/32470	0.107938	0.545695	0.500438	Lus10035730.g/Lus10002865.g/Lus10009789.g/Lus10017730.g/Lus10009819.g/Lus10040925.g/Lus10037356.g/Lus10002674.g/Lus10024107.g/Lus10031872.g	10
GO:0002098	BP	tRNA wobble uridine modification	3/2242	17/32470	0.108312	0.545695	0.500438	Lus10009739.g/Lus10041378.g/Lus10001102.g	3
GO:0032300	CC	mismatch repair complex	3/2242	17/32470	0.108312	0.545695	0.500438	Lus10034734.g/Lus10033274.g/Lus10017724.g	3
GO:0034250	BP	positive regulation of cellular amide metabolic process	3/2242	17/32470	0.108312	0.545695	0.500438	Lus10030422.g/Lus10026637.g/Lus10023619.g	3
GO:0045727	BP	positive regulation of translation	3/2242	17/32470	0.108312	0.545695	0.500438	Lus10030422.g/Lus10026637.g/Lus10023619.g	3
GO:0022843	MF	voltage-gated cation channel activity	7/2242	59/32470	0.110778	0.554692	0.508689	Lus10005221.g/Lus10018594.g/Lus10019442.g/Lus10031320.g/Lus10031891.g/Lus10037904.g/Lus10043298.g	7
GO:0015988	BP	energy coupled proton transmembrane transport, against electrochemical gradient	6/2242	48/32470	0.111275	0.554692	0.508689	Lus10010618.g/Lus10010623.g/Lus10033179.g/Lus10033934.g/Lus10010619.g/Lus10033382.g	6
GO:0015991	BP	ATP hydrolysis coupled proton transport	6/2242	48/32470	0.111275	0.554692	0.508689	Lus10010618.g/Lus10010623.g/Lus10033179.g/Lus10033934.g/Lus10010619.g/Lus10033382.g	6
GO:0072329	BP	monocarboxylic acid catabolic process	6/2242	48/32470	0.111275	0.554692	0.508689	C8303341.1/Lus10020908.g/Lus10042839.g/Lus10024038.g/Lus10012306.g/Lus10032150.g	6
GO:0090662	BP	ATP hydrolysis coupled transmembrane transport	6/2242	48/32470	0.111275	0.554692	0.508689	Lus10010618.g/Lus10010623.g/Lus10033179.g/Lus10033934.g/Lus10010619.g/Lus10033382.g	6
GO:0099131	BP	ATP hydrolysis coupled ion transmembrane transport	6/2242	48/32470	0.111275	0.554692	0.508689	Lus10010618.g/Lus10010623.g/Lus10033179.g/Lus10033934.g/Lus10010619.g/Lus10033382.g	6
GO:0099132	BP	ATP hydrolysis coupled cation transmembrane transport	6/2242	48/32470	0.111275	0.554692	0.508689	Lus10010618.g/Lus10010623.g/Lus10033179.g/Lus10033934.g/Lus10010619.g/Lus10033382.g	6
GO:0042625	MF	ATPase coupled ion transmembrane transporter activity	18/2242	191/32470	0.111571	0.555332	0.509276	Lus10027725.g/Lus10026946.g/Lus10033386.g/Lus10042040.g/Lus10009789.g/Lus10034840.g/Lus10027727.g/Lus10026944.g/Lus10010623.g/Lus10033637.g/Lus10033179.g/Lus10033934.g/Lus10010619.g/Lus10042445.g/Lus10003259.g/Lus10033382.g/Lus10018687.g/Lus10018044.g	18
GO:0010319	CC	stromule	4/2242	27/32470	0.112199	0.556054	0.509938	Lus10034595.g/Lus10000651.g/Lus10036973.g/Lus10033394.g	4
GO:0015293	MF	symporter activity	12/2242	118/32470	0.114654	0.556054	0.509938	Lus10033814.g/Lus10025800.g/Lus10029966.g/Lus10035354.g/Lus10011288.g/Lus10029970.g/Lus10028303.g/Lus10041748.g/Lus10029962.g/Lus10018956.g/Lus10040482.g/Lus10005870.g	12
GO:0009738	BP	abscisic acid-activated signaling pathway	14/2242	143/32470	0.118135	0.556054	0.509938	Lus10042731.g/Lus10011824.g/Lus10021190.g/Lus10020719.g/scaffold1202.11/Lus10005619.g/Lus10000659.g/Lus10028001.g/Lus10036667.g/Lus10014657.g/Lus10017251.g/Lus10041093.g/Lus10015009.g/Lus10035801.g	14
GO:0001056	MF	RNA polymerase III activity	5/2242	38/32470	0.11865	0.556054	0.509938	Lus10000362.g/Lus10013128.g/Lus10041724.g/Lus10012787.g/Lus10040717.g	5
GO:0009707	CC	chloroplast outer membrane	5/2242	38/32470	0.11865	0.556054	0.509938	Lus10025846.g/Lus10038254.g/Lus10000651.g/Lus10036973.g/Lus10031863.g	5
GO:0045892	BP	negative regulation of transcription, DNA-templated	13/2242	131/32470	0.119239	0.556054	0.509938	Lus10005134.g/scaffold370.2/Lus10012202.g/Lus10008007.g/Lus10019348.g/Lus10007849.g/Lus10009351.g/Lus10004759.g/Lus10043200.g/Lus10024485.g/Lus10021650.g/Lus10041718.g/Lus10043433.g	13
GO:0009250	BP	glucan biosynthetic process	16/2242	168/32470	0.11959	0.556054	0.509938	Lus10032415.g/Lus10027725.g/Lus10012264.g/Lus10023057.g/Lus10023553.g/Lus10034595.g/Lus10020750.g/Lus10016012.g/Lus10037469.g/Lus10034664.g/Lus10023056.g/Lus10040437.g/Lus10007327.g/Lus10017868.g/Lus10039607.g/Lus10029049.g	16
GO:0009072	BP	aromatic amino acid family metabolic process	10/2242	95/32470	0.11973	0.556054	0.509938	Lus10028135.g/Lus10042839.g/Lus10029820.g/Lus10004026.g/Lus10010485.g/Lus10030274.g/Lus10019822.g/Lus10014091.g/Lus10020740.g/Lus10014092.g	10
GO:0010016	BP	shoot system morphogenesis	10/2242	95/32470	0.11973	0.556054	0.509938	scaffold272.125/Lus10008098.g/Lus10022225.g/Lus10029876.g/Lus10007849.g/scaffold33.133/Lus10022636.g/Lus10004759.g/Lus10041794.g/Lus10023694.g	10
GO:0031969	CC	chloroplast membrane	10/2242	95/32470	0.11973	0.556054	0.509938	Lus10025846.g/Lus10038254.g/Lus10025800.g/Lus10026878.g/Lus10000651.g/Lus10036973.g/Lus10012657.g/Lus10018687.g/Lus10031863.g/Lus10001612.g	10
GO:0071396	BP	cellular response to lipid	19/2242	206/32470	0.121451	0.556054	0.509938	Lus10042731.g/Lus10011824.g/Lus10027969.g/Lus10021190.g/Lus10020719.g/scaffold1202.11/Lus10005619.g/Lus10000659.g/Lus10028001.g/Lus10002900.g/Lus10036667.g/Lus10037032.g/Lus10014657.g/Lus10002028.g/Lus10017251.g/Lus10041093.g/Lus10015009.g/Lus10035801.g/Lus10015238.g	19
GO:0044454	CC	nuclear chromosome part	17/2242	181/32470	0.121956	0.556054	0.509938	Lus10005783.g/Lus10034734.g/Lus10041143.g/Lus10006818.g/Lus10010844.g/Lus10010242.g/Lus10025814.g/Lus10033274.g/Lus10016644.g/Lus10018907.g/Lus10011320.g/Lus10036517.g/Lus10023406.g/Lus10021650.g/Lus10025203.g/Lus10012092.g/Lus10015868.g	17
GO:0044419	BP	interspecies interaction between organisms	8/2242	72/32470	0.122579	0.556054	0.509938	Lus10004289.g/Lus10022893.g/Lus10030942.g/Lus10037136.g/Lus10019227.g/Lus10005395.g/Lus10040105.g/Lus10016109.g	8
GO:0005047	MF	signal recognition particle binding	3/2242	18/32470	0.123618	0.556054	0.509938	scaffold43.21/Lus10017891.g/Lus10040614.g	3
GO:0016405	MF	CoA-ligase activity	3/2242	18/32470	0.123618	0.556054	0.509938	Lus10037735.g/Lus10016870.g/Lus10016869.g	3
GO:0019288	BP	isopentenyl diphosphate biosynthetic process, methylerythritol 4-phosphate pathway	3/2242	18/32470	0.123618	0.556054	0.509938	Lus10002356.g/Lus10003149.g/Lus10026322.g	3
GO:0000254	MF	C-4 methylsterol oxidase activity	2/2242	9/32470	0.124155	0.556054	0.509938	Lus10006058.g/Lus10040739.g	2
GO:0000990	MF	obsolete transcription factor activity, core RNA polymerase binding	2/2242	9/32470	0.124155	0.556054	0.509938	Lus10038823.g/Lus10014934.g	2
GO:0003958	MF	NADPH-hemoprotein reductase activity	2/2242	9/32470	0.124155	0.556054	0.509938	Lus10025485.g/Lus10025484.g	2
GO:0004084	MF	branched-chain-amino-acid transaminase activity	2/2242	9/32470	0.124155	0.556054	0.509938	scaffold338.16/Lus10007247.g	2
GO:0004322	MF	ferroxidase activity	2/2242	9/32470	0.124155	0.556054	0.509938	Lus10002865.g/scaffold863.77	2
GO:0004416	MF	hydroxyacylglutathione hydrolase activity	2/2242	9/32470	0.124155	0.556054	0.509938	Lus10020760.g/Lus10007336.g	2
GO:0006741	BP	NADP biosynthetic process	2/2242	9/32470	0.124155	0.556054	0.509938	Lus10009958.g/Lus10003178.g	2
GO:0008199	MF	ferric iron binding	2/2242	9/32470	0.124155	0.556054	0.509938	Lus10002865.g/scaffold863.77	2
GO:0010329	MF	auxin efflux transmembrane transporter activity	2/2242	9/32470	0.124155	0.556054	0.509938	Lus10020193.g/Lus10026994.g	2
GO:0016174	MF	NAD(P)H oxidase activity	2/2242	9/32470	0.124155	0.556054	0.509938	Lus10017527.g/Lus10028755.g	2
GO:0016724	MF	oxidoreductase activity, oxidizing metal ions, oxygen as acceptor	2/2242	9/32470	0.124155	0.556054	0.509938	Lus10002865.g/scaffold863.77	2
GO:0016855	MF	racemase and epimerase activity, acting on amino acids and derivatives	2/2242	9/32470	0.124155	0.556054	0.509938	Lus10014492.g/Lus10001514.g	2
GO:0031058	BP	positive regulation of histone modification	2/2242	9/32470	0.124155	0.556054	0.509938	Lus10010733.g/Lus10036678.g	2
GO:0034227	BP	tRNA thio-modification	2/2242	9/32470	0.124155	0.556054	0.509938	Lus10009739.g/Lus10041378.g	2
GO:0034508	BP	centromere complex assembly	2/2242	9/32470	0.124155	0.556054	0.509938	Lus10011470.g/Lus10023105.g	2
GO:0052654	MF	L-leucine transaminase activity	2/2242	9/32470	0.124155	0.556054	0.509938	scaffold338.16/Lus10007247.g	2
GO:0052655	MF	L-valine transaminase activity	2/2242	9/32470	0.124155	0.556054	0.509938	scaffold338.16/Lus10007247.g	2
GO:0052656	MF	L-isoleucine transaminase activity	2/2242	9/32470	0.124155	0.556054	0.509938	scaffold338.16/Lus10007247.g	2
GO:0071483	BP	cellular response to blue light	2/2242	9/32470	0.124155	0.556054	0.509938	Lus10037819.g/Lus10038823.g	2
GO:1905269	BP	positive regulation of chromatin organization	2/2242	9/32470	0.124155	0.556054	0.509938	Lus10010733.g/Lus10036678.g	2
GO:0046915	MF	transition metal ion transmembrane transporter activity	10/2242	96/32470	0.125882	0.556054	0.509938	Lus10035730.g/Lus10016487.g/Lus10009789.g/Lus10040744.g/Lus10009819.g/Lus10009598.g/Lus10040925.g/Lus10002674.g/Lus10024107.g/Lus10031872.g	10
GO:0019682	BP	glyceraldehyde-3-phosphate metabolic process	7/2242	61/32470	0.126239	0.556054	0.509938	Lus10032078.g/Lus10014614.g/Lus10015715.g/Lus10002356.g/Lus10032079.g/Lus10003149.g/Lus10026322.g	7
GO:0022853	MF	active ion transmembrane transporter activity	18/2242	195/32470	0.128215	0.556054	0.509938	Lus10027725.g/Lus10026946.g/Lus10033386.g/Lus10042040.g/Lus10009789.g/Lus10034840.g/Lus10027727.g/Lus10026944.g/Lus10010623.g/Lus10033637.g/Lus10033179.g/Lus10033934.g/Lus10010619.g/Lus10042445.g/Lus10003259.g/Lus10033382.g/Lus10018687.g/Lus10018044.g	18
GO:0006006	BP	glucose metabolic process	6/2242	50/32470	0.1287	0.556054	0.509938	Lus10032078.g/Lus10014614.g/Lus10034595.g/Lus10032079.g/Lus10031877.g/Lus10009602.g	6
GO:0048583	BP	regulation of response to stimulus	23/2242	259/32470	0.129499	0.556054	0.509938	Lus10042731.g/Lus10027969.g/scaffold732.45/Lus10020719.g/Lus10002900.g/Lus10035472.g/Lus10021940.g/Lus10011929.g/Lus10030599.g/Lus10039911.g/Lus10022265.g/Lus10023302.g/Lus10001137.g/Lus10002028.g/Lus10030597.g/Lus10030891.g/Lus10021403.g/Lus10038656.g/Lus10016162.g/Lus10027639.g/Lus10008129.g/Lus10013166.g/Lus10027648.g	23
GO:0010181	MF	FMN binding	8/2242	73/32470	0.12985	0.556054	0.509938	Lus10038507.g/Lus10025485.g/Lus10013218.g/Lus10023302.g/Lus10014795.g/scaffold372.16/Lus10025484.g/Lus10041718.g	8
GO:0016485	BP	protein processing	12/2242	121/32470	0.131012	0.556054	0.509938	Lus10024599.g/Lus10030080.g/Lus10037011.g/Lus10024446.g/Lus10027436.g/Lus10015793.g/Lus10016516.g/Lus10041018.g/Lus10001612.g/Lus10012075.g/Lus10035633.g/Lus10042064.g	12
GO:0000171	MF	ribonuclease MRP activity	1/2242	2/32470	0.133331	0.556054	0.509938	Lus10026483.g	1
GO:0000172	CC	ribonuclease MRP complex	1/2242	2/32470	0.133331	0.556054	0.509938	Lus10026483.g	1
GO:0001508	BP	action potential	1/2242	2/32470	0.133331	0.556054	0.509938	Lus10018594.g	1
GO:0002213	BP	defense response to insect	1/2242	2/32470	0.133331	0.556054	0.509938	Lus10022349.g	1
GO:0003156	BP	regulation of animal organ formation	1/2242	2/32470	0.133331	0.556054	0.509938	Lus10007231.g	1
GO:0003867	MF	4-aminobutyrate transaminase activity	1/2242	2/32470	0.133331	0.556054	0.509938	Lus10003810.g	1
GO:0003985	MF	acetyl-CoA C-acetyltransferase activity	1/2242	2/32470	0.133331	0.556054	0.509938	Lus10039109.g	1
GO:0004105	MF	choline-phosphate cytidylyltransferase activity	1/2242	2/32470	0.133331	0.556054	0.509938	Lus10036229.g	1
GO:0004334	MF	fumarylacetoacetase activity	1/2242	2/32470	0.133331	0.556054	0.509938	Lus10010485.g	1
GO:0004421	MF	hydroxymethylglutaryl-CoA synthase activity	1/2242	2/32470	0.133331	0.556054	0.509938	Lus10006348.g	1
GO:0004633	MF	phosphopantothenoylcysteine decarboxylase activity	1/2242	2/32470	0.133331	0.556054	0.509938	Lus10014795.g	1
GO:0004648	MF	O-phospho-L-serine:2-oxoglutarate aminotransferase activity	1/2242	2/32470	0.133331	0.556054	0.509938	Lus10005333.g	1
GO:0004649	MF	poly(ADP-ribose) glycohydrolase activity	1/2242	2/32470	0.133331	0.556054	0.509938	Lus10020902.g	1
GO:0004735	MF	pyrroline-5-carboxylate reductase activity	1/2242	2/32470	0.133331	0.556054	0.509938	Lus10019103.g	1
GO:0004793	MF	threonine aldolase activity	1/2242	2/32470	0.133331	0.556054	0.509938	Lus10014658.g	1
GO:0004855	MF	xanthine oxidase activity	1/2242	2/32470	0.133331	0.556054	0.509938	Lus10034306.g	1
GO:0005245	MF	voltage-gated calcium channel activity	1/2242	2/32470	0.133331	0.556054	0.509938	Lus10018594.g	1
GO:0006285	BP	base-excision repair, AP site formation	1/2242	2/32470	0.133331	0.556054	0.509938	Lus10025575.g	1
GO:0006294	BP	nucleotide-excision repair, preincision complex assembly	1/2242	2/32470	0.133331	0.556054	0.509938	Lus10004462.g	1
GO:0006567	BP	threonine catabolic process	1/2242	2/32470	0.133331	0.556054	0.509938	Lus10014658.g	1
GO:0007584	BP	response to nutrient	1/2242	2/32470	0.133331	0.556054	0.509938	Lus10035801.g	1
GO:0008716	MF	D-alanine-D-alanine ligase activity	1/2242	2/32470	0.133331	0.556054	0.509938	Lus10012211.g	1
GO:0008732	MF	L-allo-threonine aldolase activity	1/2242	2/32470	0.133331	0.556054	0.509938	Lus10014658.g	1
GO:0009039	MF	urease activity	1/2242	2/32470	0.133331	0.556054	0.509938	Lus10036993.g	1
GO:0009594	BP	detection of nutrient	1/2242	2/32470	0.133331	0.556054	0.509938	Lus10035801.g	1
GO:0009635	BP	response to herbicide	1/2242	2/32470	0.133331	0.556054	0.509938	Lus10029955.g	1
GO:0009649	BP	entrainment of circadian clock	1/2242	2/32470	0.133331	0.556054	0.509938	Lus10035332.g	1
GO:0010080	BP	regulation of floral meristem growth	1/2242	2/32470	0.133331	0.556054	0.509938	Lus10017223.g	1
GO:0010081	BP	regulation of inflorescence meristem growth	1/2242	2/32470	0.133331	0.556054	0.509938	Lus10017223.g	1
GO:0010178	MF	IAA-amino acid conjugate hydrolase activity	1/2242	2/32470	0.133331	0.556054	0.509938	Lus10021321.g	1
GO:0010210	MF	IAA-Phe conjugate hydrolase activity	1/2242	2/32470	0.133331	0.556054	0.509938	Lus10021321.g	1
GO:0010211	MF	IAA-Leu conjugate hydrolase activity	1/2242	2/32470	0.133331	0.556054	0.509938	Lus10021321.g	1
GO:0010213	BP	non-photoreactive DNA repair	1/2242	2/32470	0.133331	0.556054	0.509938	Lus10004462.g	1
GO:0010260	BP	animal organ senescence	1/2242	2/32470	0.133331	0.556054	0.509938	Lus10035801.g	1
GO:0010299	BP	detoxification of cobalt ion	1/2242	2/32470	0.133331	0.556054	0.509938	Lus10002674.g	1
GO:0010301	MF	xanthoxin dehydrogenase activity	1/2242	2/32470	0.133331	0.556054	0.509938	Lus10016354.g	1
GO:0010312	BP	detoxification of zinc ion	1/2242	2/32470	0.133331	0.556054	0.509938	Lus10002674.g	1
GO:0010450	BP	inflorescence meristem growth	1/2242	2/32470	0.133331	0.556054	0.509938	Lus10017223.g	1
GO:0010451	BP	floral meristem growth	1/2242	2/32470	0.133331	0.556054	0.509938	Lus10017223.g	1
GO:0016453	MF	C-acetyltransferase activity	1/2242	2/32470	0.133331	0.556054	0.509938	Lus10039109.g	1
GO:0016727	MF	oxidoreductase activity, acting on CH or CH2 groups, oxygen as acceptor	1/2242	2/32470	0.133331	0.556054	0.509938	Lus10034306.g	1
GO:0016822	MF	hydrolase activity, acting on acid carbon-carbon bonds	1/2242	2/32470	0.133331	0.556054	0.509938	Lus10010485.g	1
GO:0016823	MF	hydrolase activity, acting on acid carbon-carbon bonds, in ketonic substances	1/2242	2/32470	0.133331	0.556054	0.509938	Lus10010485.g	1
GO:0019499	BP	cyanide metabolic process	1/2242	2/32470	0.133331	0.556054	0.509938	Lus10014765.g	1
GO:0019500	BP	cyanide catabolic process	1/2242	2/32470	0.133331	0.556054	0.509938	Lus10014765.g	1
GO:0030155	BP	regulation of cell adhesion	1/2242	2/32470	0.133331	0.556054	0.509938	Lus10021125.g	1
GO:0030289	CC	protein phosphatase 4 complex	1/2242	2/32470	0.133331	0.556054	0.509938	Lus10008757.g	1
GO:0032973	BP	amino acid export across plasma membrane	1/2242	2/32470	0.133331	0.556054	0.509938	Lus10003738.g	1
GO:0033204	MF	ribonuclease P RNA binding	1/2242	2/32470	0.133331	0.556054	0.509938	Lus10026483.g	1
GO:0033473	BP	indoleacetic acid conjugate metabolic process	1/2242	2/32470	0.133331	0.556054	0.509938	Lus10034253.g	1
GO:0034635	BP	glutathione transport	1/2242	2/32470	0.133331	0.556054	0.509938	Lus10008964.g	1
GO:0035861	CC	site of double-strand break	1/2242	2/32470	0.133331	0.556054	0.509938	Lus10016644.g	1
GO:0036065	BP	fucosylation	1/2242	2/32470	0.133331	0.556054	0.509938	Lus10027959.g	1
GO:0036071	BP	N-glycan fucosylation	1/2242	2/32470	0.133331	0.556054	0.509938	Lus10027959.g	1
GO:0042939	BP	tripeptide transport	1/2242	2/32470	0.133331	0.556054	0.509938	Lus10008964.g	1
GO:0043419	BP	urea catabolic process	1/2242	2/32470	0.133331	0.556054	0.509938	Lus10036993.g	1
GO:0046921	MF	alpha-(1->6)-fucosyltransferase activity	1/2242	2/32470	0.133331	0.556054	0.509938	Lus10027959.g	1
GO:0048645	BP	animal organ formation	1/2242	2/32470	0.133331	0.556054	0.509938	Lus10007231.g	1
GO:0048700	BP	acquisition of desiccation tolerance in seed	1/2242	2/32470	0.133331	0.556054	0.509938	Lus10019636.g	1
GO:0050017	MF	L-3-cyanoalanine synthase activity	1/2242	2/32470	0.133331	0.556054	0.509938	Lus10014765.g	1
GO:0050112	MF	inositol 2-dehydrogenase activity	1/2242	2/32470	0.133331	0.556054	0.509938	Lus10007490.g	1
GO:0050269	MF	coniferyl-aldehyde dehydrogenase activity	1/2242	2/32470	0.133331	0.556054	0.509938	Lus10019387.g	1
GO:0050403	MF	trans-zeatin O-beta-D-glucosyltransferase activity	1/2242	2/32470	0.133331	0.556054	0.509938	Lus10014437.g	1
GO:0050502	MF	cis-zeatin O-beta-D-glucosyltransferase activity	1/2242	2/32470	0.133331	0.556054	0.509938	Lus10014437.g	1
GO:0051880	MF	G-quadruplex DNA binding	1/2242	2/32470	0.133331	0.556054	0.509938	Lus10016644.g	1
GO:0051899	BP	membrane depolarization	1/2242	2/32470	0.133331	0.556054	0.509938	Lus10018594.g	1
GO:0055129	BP	L-proline biosynthetic process	1/2242	2/32470	0.133331	0.556054	0.509938	Lus10019103.g	1
GO:0061687	BP	detoxification of inorganic compound	1/2242	2/32470	0.133331	0.556054	0.509938	Lus10002674.g	1
GO:0070207	BP	protein homotrimerization	1/2242	2/32470	0.133331	0.556054	0.509938	Lus10014795.g	1
GO:0071076	BP	RNA 3' uridylation	1/2242	2/32470	0.133331	0.556054	0.509938	Lus10001012.g	1
GO:0072718	BP	response to cisplatin	1/2242	2/32470	0.133331	0.556054	0.509938	Lus10019636.g	1
GO:0080030	MF	methyl indole-3-acetate esterase activity	1/2242	2/32470	0.133331	0.556054	0.509938	Lus10034253.g	1
GO:0080046	MF	quercetin 4'-O-glucosyltransferase activity	1/2242	2/32470	0.133331	0.556054	0.509938	Lus10014437.g	1
GO:0080140	BP	regulation of jasmonic acid metabolic process	1/2242	2/32470	0.133331	0.556054	0.509938	Lus10018594.g	1
GO:0080141	BP	regulation of jasmonic acid biosynthetic process	1/2242	2/32470	0.133331	0.556054	0.509938	Lus10018594.g	1
GO:0080144	BP	amino acid homeostasis	1/2242	2/32470	0.133331	0.556054	0.509938	Lus10003738.g	1
GO:0080187	BP	floral organ senescence	1/2242	2/32470	0.133331	0.556054	0.509938	Lus10027404.g	1
GO:0086010	BP	membrane depolarization during action potential	1/2242	2/32470	0.133331	0.556054	0.509938	Lus10018594.g	1
GO:0090421	BP	embryonic meristem initiation	1/2242	2/32470	0.133331	0.556054	0.509938	Lus10029876.g	1
GO:0090734	CC	site of DNA damage	1/2242	2/32470	0.133331	0.556054	0.509938	Lus10016644.g	1
GO:0097439	BP	acquisition of desiccation tolerance	1/2242	2/32470	0.133331	0.556054	0.509938	Lus10019636.g	1
GO:0097501	BP	stress response to metal ion	1/2242	2/32470	0.133331	0.556054	0.509938	Lus10002674.g	1
GO:1990077	CC	primosome complex	1/2242	2/32470	0.133331	0.556054	0.509938	Lus10006088.g	1
GO:1990359	BP	stress response to zinc ion	1/2242	2/32470	0.133331	0.556054	0.509938	Lus10002674.g	1
GO:0000989	MF	obsolete transcription factor activity, transcription factor binding	16/2242	171/32470	0.133453	0.556054	0.509938	Lus10010733.g/scaffold732.45/Lus10035472.g/Lus10011929.g/Lus10036678.g/Lus10039911.g/Lus10039562.g/Lus10027639.g/Lus10013170.g/Lus10009717.g/Lus10008129.g/Lus10022418.g/Lus10031087.g/Lus10021650.g/Lus10013166.g/Lus10027648.g	16
GO:0010817	BP	regulation of hormone levels	16/2242	171/32470	0.133453	0.556054	0.509938	Lus10003845.g/scaffold272.125/Lus10026471.g/Lus10008098.g/Lus10024289.g/Lus10020193.g/Lus10011093.g/Lus10041794.g/scaffold380.27/Lus10034253.g/Lus10014437.g/Lus10019712.g/Lus10018038.g/Lus10026994.g/Lus10041508.g/Lus10021321.g	16
GO:0045893	BP	positive regulation of transcription, DNA-templated	13/2242	134/32470	0.135083	0.560723	0.514219	Lus10005134.g/scaffold370.2/Lus10021369.g/Lus10029051.g/Lus10017049.g/Lus10022225.g/Lus10038823.g/Lus10014934.g/Lus10027404.g/Lus10003119.g/Lus10003810.g/Lus10041126.g/Lus10017289.g	13
GO:1902680	BP	positive regulation of RNA biosynthetic process	13/2242	134/32470	0.135083	0.560723	0.514219	Lus10005134.g/scaffold370.2/Lus10021369.g/Lus10029051.g/Lus10017049.g/Lus10022225.g/Lus10038823.g/Lus10014934.g/Lus10027404.g/Lus10003119.g/Lus10003810.g/Lus10041126.g/Lus10017289.g	13
GO:1903508	BP	positive regulation of nucleic acid-templated transcription	13/2242	134/32470	0.135083	0.560723	0.514219	Lus10005134.g/scaffold370.2/Lus10021369.g/Lus10029051.g/Lus10017049.g/Lus10022225.g/Lus10038823.g/Lus10014934.g/Lus10027404.g/Lus10003119.g/Lus10003810.g/Lus10041126.g/Lus10017289.g	13
GO:0004707	MF	MAP kinase activity	4/2242	29/32470	0.136584	0.566241	0.51928	Lus10033197.g/Lus10022265.g/Lus10001137.g/Lus10013702.g	4
GO:0000149	MF	SNARE binding	9/2242	86/32470	0.138592	0.571766	0.524346	Lus10002478.g/Lus10012211.g/Lus10040213.g/Lus10018296.g/Lus10001254.g/Lus10017686.g/Lus10037826.g/Lus10000311.g/Lus10011737.g	9
GO:0015299	MF	solute:proton antiporter activity	10/2242	98/32470	0.13869	0.571766	0.524346	Lus10004819.g/Lus10035507.g/Lus10040674.g/Lus10039131.g/Lus10002490.g/Lus10005934.g/Lus10015268.g/Lus10018989.g/Lus10033840.g/Lus10009829.g	10
GO:0005451	MF	monovalent cation:proton antiporter activity	5/2242	40/32470	0.139372	0.571766	0.524346	Lus10039131.g/Lus10005934.g/Lus10015268.g/Lus10018989.g/Lus10033840.g	5
GO:0005666	CC	RNA polymerase III complex	5/2242	40/32470	0.139372	0.571766	0.524346	Lus10000362.g/Lus10013128.g/Lus10041724.g/Lus10012787.g/Lus10040717.g	5
GO:0009527	CC	plastid outer membrane	5/2242	40/32470	0.139372	0.571766	0.524346	Lus10025846.g/Lus10038254.g/Lus10000651.g/Lus10036973.g/Lus10031863.g	5
GO:0016899	MF	oxidoreductase activity, acting on the CH-OH group of donors, oxygen as acceptor	5/2242	40/32470	0.139372	0.571766	0.524346	Lus10038507.g/Lus10022903.g/Lus10023302.g/Lus10038620.g/Lus10011800.g	5
GO:0042391	BP	regulation of membrane potential	5/2242	40/32470	0.139372	0.571766	0.524346	Lus10005221.g/Lus10018594.g/Lus10031320.g/Lus10031891.g/Lus10037904.g	5
GO:0002097	BP	tRNA wobble base modification	3/2242	19/32470	0.139649	0.571766	0.524346	Lus10009739.g/Lus10041378.g/Lus10001102.g	3
GO:0004602	MF	glutathione peroxidase activity	3/2242	19/32470	0.139649	0.571766	0.524346	Lus10008499.g/Lus10026887.g/Lus10003421.g	3
GO:0016872	MF	intramolecular lyase activity	3/2242	19/32470	0.139649	0.571766	0.524346	Lus10000692.g/Lus10019671.g/Lus10003311.g	3
GO:0004702	MF	obsolete signal transducer, downstream of receptor, with serine/threonine kinase activity	17/2242	185/32470	0.140121	0.572277	0.524815	Lus10030229.g/Lus10024192.g/Lus10033197.g/Lus10035284.g/Lus10030042.g/Lus10005983.g/Lus10033230.g/Lus10022265.g/Lus10042632.g/Lus10001137.g/Lus10016620.g/Lus10032761.g/Lus10024474.g/Lus10013702.g/Lus10009983.g/Lus10009631.g/Lus10013384.g	17
GO:0005057	MF	obsolete signal transducer activity, downstream of receptor	17/2242	185/32470	0.140121	0.572277	0.524815	Lus10030229.g/Lus10024192.g/Lus10033197.g/Lus10035284.g/Lus10030042.g/Lus10005983.g/Lus10033230.g/Lus10022265.g/Lus10042632.g/Lus10001137.g/Lus10016620.g/Lus10032761.g/Lus10024474.g/Lus10013702.g/Lus10009983.g/Lus10009631.g/Lus10013384.g	17
GO:0015298	MF	solute:cation antiporter activity	10/2242	99/32470	0.145341	0.587051	0.538364	Lus10004819.g/Lus10035507.g/Lus10040674.g/Lus10039131.g/Lus10002490.g/Lus10005934.g/Lus10015268.g/Lus10018989.g/Lus10033840.g/Lus10009829.g	10
GO:0004003	MF	ATP-dependent DNA helicase activity	6/2242	52/32470	0.147347	0.587051	0.538364	Lus10005783.g/Lus10028385.g/Lus10006818.g/Lus10034749.g/Lus10016644.g/Lus10015868.g	6
GO:0006730	BP	one-carbon metabolic process	6/2242	52/32470	0.147347	0.587051	0.538364	Lus10026541.g/Lus10004694.g/Lus10009985.g/Lus10038044.g/Lus10040261.g/Lus10042923.g	6
GO:0016051	BP	carbohydrate biosynthetic process	28/2242	329/32470	0.148195	0.587051	0.538364	Lus10032415.g/Lus10027725.g/Lus10012264.g/Lus10023057.g/Lus10023553.g/Lus10000692.g/Lus10034595.g/Lus10015715.g/Lus10019671.g/Lus10005559.g/Lus10011360.g/Lus10020750.g/Lus10016012.g/Lus10037469.g/Lus10012990.g/Lus10021805.g/Lus10034664.g/Lus10010268.g/Lus10023056.g/Lus10040437.g/Lus10007327.g/Lus10038620.g/Lus10017868.g/Lus10018554.g/Lus10039607.g/Lus10037026.g/scaffold82.22/Lus10029049.g	28
GO:0003825	MF	alpha,alpha-trehalose-phosphate synthase (UDP-forming) activity	2/2242	10/32470	0.148364	0.587051	0.538364	Lus10005559.g/Lus10012990.g	2
GO:0003841	MF	1-acylglycerol-3-phosphate O-acyltransferase activity	2/2242	10/32470	0.148364	0.587051	0.538364	Lus10002556.g/Lus10027375.g	2
GO:0003951	MF	NAD+ kinase activity	2/2242	10/32470	0.148364	0.587051	0.538364	Lus10009958.g/Lus10003178.g	2
GO:0003978	MF	UDP-glucose 4-epimerase activity	2/2242	10/32470	0.148364	0.587051	0.538364	scaffold98.117/Lus10038423.g	2
GO:0004335	MF	galactokinase activity	2/2242	10/32470	0.148364	0.587051	0.538364	Lus10037789.g/Lus10016320.g	2
GO:0004556	MF	alpha-amylase activity	2/2242	10/32470	0.148364	0.587051	0.538364	scaffold9.86/Lus10030793.g	2
GO:0005785	CC	signal recognition particle receptor complex	2/2242	10/32470	0.148364	0.587051	0.538364	scaffold43.21/Lus10017891.g	2
GO:0008893	MF	guanosine-3',5'-bis(diphosphate) 3'-diphosphatase activity	2/2242	10/32470	0.148364	0.587051	0.538364	Lus10001862.g/Lus10037672.g	2
GO:0016794	MF	diphosphoric monoester hydrolase activity	2/2242	10/32470	0.148364	0.587051	0.538364	Lus10001862.g/Lus10037672.g	2
GO:0019320	BP	hexose catabolic process	2/2242	10/32470	0.148364	0.587051	0.538364	Lus10034595.g/Lus10031877.g	2
GO:0030149	BP	sphingolipid catabolic process	2/2242	10/32470	0.148364	0.587051	0.538364	Lus10011345.g/Lus10003129.g	2
GO:0030705	BP	cytoskeleton-dependent intracellular transport	2/2242	10/32470	0.148364	0.587051	0.538364	Lus10017359.g/Lus10006670.g	2
GO:0035065	BP	regulation of histone acetylation	2/2242	10/32470	0.148364	0.587051	0.538364	Lus10010733.g/Lus10036678.g	2
GO:0042171	MF	lysophosphatidic acid acyltransferase activity	2/2242	10/32470	0.148364	0.587051	0.538364	Lus10002556.g/Lus10027375.g	2
GO:0046466	BP	membrane lipid catabolic process	2/2242	10/32470	0.148364	0.587051	0.538364	Lus10011345.g/Lus10003129.g	2
GO:0046577	MF	long-chain-alcohol oxidase activity	2/2242	10/32470	0.148364	0.587051	0.538364	Lus10022903.g/Lus10011800.g	2
GO:0052852	MF	very-long-chain-(S)-2-hydroxy-acid oxidase activity	2/2242	10/32470	0.148364	0.587051	0.538364	Lus10038507.g/Lus10023302.g	2
GO:0052853	MF	long-chain-(S)-2-hydroxy-long-chain-acid oxidase activity	2/2242	10/32470	0.148364	0.587051	0.538364	Lus10038507.g/Lus10023302.g	2
GO:0052854	MF	medium-chain-(S)-2-hydroxy-acid oxidase activity	2/2242	10/32470	0.148364	0.587051	0.538364	Lus10038507.g/Lus10023302.g	2
GO:0071617	MF	lysophospholipid acyltransferase activity	2/2242	10/32470	0.148364	0.587051	0.538364	Lus10002556.g/Lus10027375.g	2
GO:1901983	BP	regulation of protein acetylation	2/2242	10/32470	0.148364	0.587051	0.538364	Lus10010733.g/Lus10036678.g	2
GO:2000756	BP	regulation of peptidyl-lysine acetylation	2/2242	10/32470	0.148364	0.587051	0.538364	Lus10010733.g/Lus10036678.g	2
GO:0008553	MF	proton-exporting ATPase activity, phosphorylative mechanism	4/2242	30/32470	0.14951	0.589468	0.54058	Lus10026946.g/Lus10026944.g/Lus10042445.g/Lus10003259.g	4
GO:0019216	BP	regulation of lipid metabolic process	4/2242	30/32470	0.14951	0.589468	0.54058	Lus10018594.g/Lus10002356.g/Lus10003149.g/Lus10016354.g	4
GO:0048532	BP	anatomical structure arrangement	4/2242	30/32470	0.14951	0.589468	0.54058	Lus10008098.g/Lus10029876.g/Lus10000639.g/Lus10000285.g	4
GO:0006857	BP	oligopeptide transport	5/2242	41/32470	0.150287	0.58971	0.540803	Lus10024614.g/Lus10032252.g/Lus10008252.g/Lus10016932.g/Lus10008964.g	5
GO:0031146	BP	SCF-dependent proteasomal ubiquitin-dependent protein catabolic process	5/2242	41/32470	0.150287	0.58971	0.540803	Lus10022706.g/Lus10014208.g/Lus10041733.g/Lus10040816.g/Lus10024021.g	5
GO:0033176	CC	proton-transporting V-type ATPase complex	5/2242	41/32470	0.150287	0.58971	0.540803	Lus10010618.g/Lus10010623.g/Lus10033179.g/Lus10010619.g/Lus10033382.g	5
GO:0046961	MF	proton-transporting ATPase activity, rotational mechanism	5/2242	41/32470	0.150287	0.58971	0.540803	Lus10010623.g/Lus10033179.g/Lus10033934.g/Lus10010619.g/Lus10033382.g	5
GO:0016765	MF	transferase activity, transferring alkyl or aryl (other than methyl) groups	18/2242	200/32470	0.150945	0.591591	0.542527	Lus10003398.g/Lus10019016.g/Lus10026643.g/Lus10030414.g/Lus10026541.g/Lus10013703.g/Lus10009985.g/Lus10017333.g/Lus10015049.g/Lus10038044.g/Lus10005570.g/Lus10029815.g/Lus10007897.g/Lus10030629.g/Lus10006281.g/Lus10042756.g/Lus10029843.g/Lus10020566.g	18
GO:0006535	BP	cysteine biosynthetic process from serine	3/2242	20/32470	0.15633	0.610521	0.559888	Lus10014765.g/Lus10015947.g/Lus10004118.g	3
GO:0009850	BP	auxin metabolic process	3/2242	20/32470	0.15633	0.610521	0.559888	Lus10011093.g/Lus10034253.g/Lus10021321.g	3
GO:0043647	BP	inositol phosphate metabolic process	3/2242	20/32470	0.15633	0.610521	0.559888	Lus10035662.g/Lus10018235.g/Lus10040669.g	3
GO:0006739	BP	NADP metabolic process	6/2242	53/32470	0.157103	0.612283	0.561503	Lus10032078.g/Lus10014614.g/Lus10009958.g/Lus10015715.g/Lus10003178.g/Lus10032079.g	6
GO:0031226	CC	intrinsic component of plasma membrane	45/2242	558/32470	0.157153	0.612283	0.561503	Lus10000310.g/Lus10015754.g/Lus10040652.g/Lus10011335.g/Lus10033814.g/Lus10009196.g/Lus10029966.g/Lus10026946.g/Lus10007691.g/Lus10005221.g/Lus10035354.g/Lus10033386.g/Lus10011288.g/Lus10001334.g/Lus10037895.g/Lus10042040.g/Lus10029970.g/Lus10009789.g/Lus10018692.g/Lus10035281.g/Lus10011826.g/Lus10034840.g/scaffold115.10/Lus10026944.g/scaffold610.41/Lus10031320.g/Lus10031891.g/Lus10032815.g/Lus10…	45
GO:0032870	BP	cellular response to hormone stimulus	34/2242	411/32470	0.157769	0.613238	0.562379	Lus10042731.g/Lus10011824.g/Lus10027969.g/scaffold732.45/Lus10021190.g/Lus10020719.g/scaffold1202.11/Lus10005619.g/Lus10000659.g/Lus10028001.g/Lus10002900.g/Lus10036667.g/Lus10037032.g/Lus10014657.g/Lus10011929.g/Lus10020193.g/Lus10039911.g/Lus10002028.g/Lus10017251.g/Lus10012421.g/Lus10019940.g/Lus10043200.g/Lus10041075.g/Lus10026994.g/Lus10041093.g/Lus10015009.g/Lus10011261.g/Lus10027639.g/Lus1…	34
GO:0071495	BP	cellular response to endogenous stimulus	34/2242	411/32470	0.157769	0.613238	0.562379	Lus10042731.g/Lus10011824.g/Lus10027969.g/scaffold732.45/Lus10021190.g/Lus10020719.g/scaffold1202.11/Lus10005619.g/Lus10000659.g/Lus10028001.g/Lus10002900.g/Lus10036667.g/Lus10037032.g/Lus10014657.g/Lus10011929.g/Lus10020193.g/Lus10039911.g/Lus10002028.g/Lus10017251.g/Lus10012421.g/Lus10019940.g/Lus10043200.g/Lus10041075.g/Lus10026994.g/Lus10041093.g/Lus10015009.g/Lus10011261.g/Lus10027639.g/Lus1…	34
GO:0042170	CC	plastid membrane	10/2242	101/32470	0.159121	0.617764	0.56653	Lus10025846.g/Lus10038254.g/Lus10025800.g/Lus10026878.g/Lus10000651.g/Lus10036973.g/Lus10012657.g/Lus10018687.g/Lus10031863.g/Lus10001612.g	10
GO:0045935	BP	positive regulation of nucleobase-containing compound metabolic process	14/2242	151/32470	0.16041	0.622038	0.57045	Lus10005134.g/scaffold370.2/Lus10021369.g/Lus10029051.g/Lus10017049.g/Lus10022225.g/Lus10038823.g/Lus10014934.g/Lus10027404.g/Lus10003119.g/Lus10003810.g/Lus10023619.g/Lus10041126.g/Lus10017289.g	14
GO:0019005	CC	SCF ubiquitin ligase complex	5/2242	42/32470	0.161547	0.625711	0.573818	Lus10022706.g/Lus10014208.g/Lus10041733.g/Lus10040816.g/Lus10024021.g	5
GO:0016832	MF	aldehyde-lyase activity	4/2242	31/32470	0.162882	0.630142	0.577881	Lus10014658.g/Lus10011345.g/Lus10003176.g/Lus10003129.g	4
GO:0044421	CC	extracellular region part	11/2242	114/32470	0.163768	0.632828	0.580345	Lus10037951.g/Lus10032754.g/Lus10024303.g/Lus10034895.g/Lus10028797.g/Lus10006130.g/Lus10033808.g/Lus10020319.g/Lus10002792.g/Lus10005672.g/Lus10005087.g	11
GO:0042445	BP	hormone metabolic process	12/2242	127/32470	0.167325	0.636211	0.583447	Lus10003845.g/scaffold272.125/Lus10026471.g/Lus10024289.g/Lus10011093.g/Lus10041794.g/scaffold380.27/Lus10034253.g/Lus10014437.g/Lus10019712.g/Lus10018038.g/Lus10021321.g	12
GO:0016651	MF	oxidoreductase activity, acting on NAD(P)H	16/2242	178/32470	0.169162	0.636211	0.583447	Lus10017527.g/Lus10028755.g/Lus10025485.g/Lus10034869.g/Lus10006737.g/Lus10033405.g/Lus10013218.g/Lus10025845.g/scaffold372.16/Lus10011259.g/Lus10043103.g/Lus10025484.g/Lus10003495.g/Lus10020087.g/Lus10039505.g/Lus10024212.g	16
GO:0004197	MF	cysteine-type endopeptidase activity	8/2242	78/32470	0.169353	0.636211	0.583447	Lus10037951.g/Lus10024599.g/Lus10024303.g/Lus10034895.g/Lus10028797.g/Lus10006130.g/Lus10031049.g/Lus10024446.g	8
GO:0006631	BP	fatty acid metabolic process	24/2242	282/32470	0.169834	0.636211	0.583447	Lus10016083.g/Lus10039278.g/Lus10002191.g/Lus10020908.g/Lus10006058.g/Lus10027515.g/Lus10018594.g/Lus10028171.g/Lus10040739.g/Lus10006502.g/Lus10015222.g/Lus10039401.g/Lus10024038.g/Lus10003176.g/Lus10000672.g/Lus10012306.g/Lus10001657.g/Lus10006637.g/Lus10019510.g/scaffold156.218/Lus10039906.g/Lus10031809.g/Lus10031236.g/Lus10018986.g	24
GO:0050793	BP	regulation of developmental process	23/2242	269/32470	0.170328	0.636211	0.583447	Lus10021369.g/Lus10005106.g/Lus10008098.g/Lus10017223.g/Lus10000659.g/Lus10028001.g/Lus10017049.g/Lus10002900.g/Lus10035472.g/Lus10007231.g/Lus10037032.g/Lus10027404.g/Lus10002028.g/Lus10037469.g/Lus10041721.g/Lus10007459.g/Lus10043200.g/Lus10027477.g/Lus10019636.g/Lus10037136.g/Lus10011113.g/Lus10037621.g/Lus10010633.g	23
GO:0016788	MF	hydrolase activity, acting on ester bonds	115/2242	1526/32470	0.172029	0.636211	0.583447	Lus10001832.g/Lus10034965.g/Lus10012962.g/Lus10009210.g/Lus10040738.g/Lus10019017.g/Lus10016369.g/Lus10003399.g/Lus10006485.g/Lus10004703.g/Lus10020760.g/Lus10009679.g/Lus10019755.g/Lus10016493.g/Lus10036873.g/Lus10034483.g/Lus10007877.g/Lus10009041.g/scaffold1999.8/Lus10007336.g/Lus10040133.g/Lus10019625.g/Lus10040270.g/Lus10037080.g/Lus10000572.g/Lus10026054.g/Lus10002500.g/Lus10033706.g/Lus100…	115
GO:0010118	BP	stomatal movement	5/2242	43/32470	0.173135	0.636211	0.583447	Lus10031826.g/Lus10018594.g/Lus10035332.g/Lus10007459.g/Lus10035765.g	5
GO:0015179	MF	L-amino acid transmembrane transporter activity	5/2242	43/32470	0.173135	0.636211	0.583447	Lus10001334.g/Lus10037544.g/Lus10018692.g/Lus10004430.g/Lus10039180.g	5
GO:0004560	MF	alpha-L-fucosidase activity	2/2242	11/32470	0.173406	0.636211	0.583447	Lus10029689.g/Lus10020979.g	2
GO:0004564	MF	beta-fructofuranosidase activity	2/2242	11/32470	0.173406	0.636211	0.583447	Lus10004340.g/Lus10028922.g	2
GO:0004575	MF	sucrose alpha-glucosidase activity	2/2242	11/32470	0.173406	0.636211	0.583447	Lus10004340.g/Lus10028922.g	2
GO:0005102	MF	signaling receptor binding	2/2242	11/32470	0.173406	0.636211	0.583447	Lus10027716.g/Lus10011721.g	2
GO:0005787	CC	signal peptidase complex	2/2242	11/32470	0.173406	0.636211	0.583447	Lus10037011.g/Lus10015793.g	2
GO:0015174	MF	basic amino acid transmembrane transporter activity	2/2242	11/32470	0.173406	0.636211	0.583447	Lus10037544.g/Lus10018692.g	2
GO:0015189	MF	L-lysine transmembrane transporter activity	2/2242	11/32470	0.173406	0.636211	0.583447	Lus10037544.g/Lus10018692.g	2
GO:0015928	MF	fucosidase activity	2/2242	11/32470	0.173406	0.636211	0.583447	Lus10029689.g/Lus10020979.g	2
GO:0016730	MF	oxidoreductase activity, acting on iron-sulfur proteins as donors	2/2242	11/32470	0.173406	0.636211	0.583447	Lus10041348.g/Lus10037370.g	2
GO:0016906	MF	sterol 3-beta-glucosyltransferase activity	2/2242	11/32470	0.173406	0.636211	0.583447	Lus10028572.g/Lus10018878.g	2
GO:0030259	BP	lipid glycosylation	2/2242	11/32470	0.173406	0.636211	0.583447	Lus10028572.g/Lus10018878.g	2
GO:0042814	BP	monopolar cell growth	2/2242	11/32470	0.173406	0.636211	0.583447	scaffold272.125/Lus10041794.g	2
GO:0045910	BP	negative regulation of DNA recombination	2/2242	11/32470	0.173406	0.636211	0.583447	Lus10021767.g/Lus10017724.g	2
GO:0050278	MF	sedoheptulose-bisphosphatase activity	2/2242	11/32470	0.173406	0.636211	0.583447	Lus10032820.g/scaffold354.2	2
GO:0051903	MF	S-(hydroxymethyl)glutathione dehydrogenase activity	2/2242	11/32470	0.173406	0.636211	0.583447	Lus10029759.g/Lus10042787.g	2
GO:0080161	MF	auxin transmembrane transporter activity	2/2242	11/32470	0.173406	0.636211	0.583447	Lus10020193.g/Lus10026994.g	2
GO:1902022	BP	L-lysine transport	2/2242	11/32470	0.173406	0.636211	0.583447	Lus10037544.g/Lus10018692.g	2
GO:1902475	BP	L-alpha-amino acid transmembrane transport	2/2242	11/32470	0.173406	0.636211	0.583447	Lus10037544.g/Lus10018692.g	2
GO:1903401	BP	L-lysine transmembrane transport	2/2242	11/32470	0.173406	0.636211	0.583447	Lus10037544.g/Lus10018692.g	2
GO:0000776	CC	kinetochore	3/2242	21/32470	0.173586	0.636211	0.583447	Lus10025814.g/Lus10011470.g/Lus10023105.g	3
GO:0004743	MF	pyruvate kinase activity	3/2242	21/32470	0.173586	0.636211	0.583447	Lus10041003.g/Lus10011057.g/Lus10000672.g	3
GO:0030955	MF	potassium ion binding	3/2242	21/32470	0.173586	0.636211	0.583447	Lus10041003.g/Lus10011057.g/Lus10000672.g	3
GO:0031420	MF	alkali metal ion binding	3/2242	21/32470	0.173586	0.636211	0.583447	Lus10041003.g/Lus10011057.g/Lus10000672.g	3
GO:0033865	BP	nucleoside bisphosphate metabolic process	3/2242	21/32470	0.173586	0.636211	0.583447	Lus10001862.g/Lus10037672.g/Lus10022102.g	3
GO:0033875	BP	ribonucleoside bisphosphate metabolic process	3/2242	21/32470	0.173586	0.636211	0.583447	Lus10001862.g/Lus10037672.g/Lus10022102.g	3
GO:0034032	BP	purine nucleoside bisphosphate metabolic process	3/2242	21/32470	0.173586	0.636211	0.583447	Lus10001862.g/Lus10037672.g/Lus10022102.g	3
GO:0051260	BP	protein homooligomerization	3/2242	21/32470	0.173586	0.636211	0.583447	Lus10036274.g/Lus10043181.g/Lus10014795.g	3
GO:1901616	BP	organic hydroxy compound catabolic process	3/2242	21/32470	0.173586	0.636211	0.583447	Lus10042839.g/Lus10006198.g/Lus10024927.g	3
GO:0051604	BP	protein maturation	12/2242	128/32470	0.173821	0.636211	0.583447	Lus10024599.g/Lus10030080.g/Lus10037011.g/Lus10024446.g/Lus10027436.g/Lus10015793.g/Lus10016516.g/Lus10041018.g/Lus10001612.g/Lus10012075.g/Lus10035633.g/Lus10042064.g	12
GO:0016614	MF	oxidoreductase activity, acting on CH-OH group of donors	39/2242	483/32470	0.174849	0.636211	0.583447	Lus10032078.g/Lus10003845.g/Lus10014614.g/Lus10029759.g/Lus10034963.g/Lus10038507.g/Lus10007490.g/Lus10026471.g/Lus10010803.g/C8303341.1/Lus10009009.g/Lus10024289.g/Lus10022903.g/scaffold380.27/Lus10023302.g/Lus10042787.g/Lus10023701.g/Lus10006502.g/Lus10016311.g/Lus10041393.g/Lus10034306.g/Lus10023366.g/Lus10012964.g/Lus10038440.g/Lus10003176.g/scaffold261.42/Lus10018038.g/Lus10037552.g/Lus10032…	39
GO:0000228	CC	nuclear chromosome	18/2242	205/32470	0.175744	0.636211	0.583447	Lus10005783.g/Lus10034734.g/Lus10041143.g/Lus10006818.g/Lus10010844.g/Lus10010242.g/Lus10025814.g/Lus10033274.g/Lus10016644.g/Lus10018907.g/Lus10011320.g/Lus10036517.g/Lus10023406.g/Lus10017724.g/Lus10021650.g/Lus10025203.g/Lus10012092.g/Lus10015868.g	18
GO:0016709	MF	oxidoreductase activity, acting on paired donors, with incorporation or reduction of molecular oxygen, NAD(P)H as one donor, and incorporation of one atom of oxygen	26/2242	310/32470	0.176819	0.636211	0.583447	scaffold272.125/Lus10015788.g/Lus10027425.g/Lus10026246.g/Lus10006058.g/Lus10036079.g/Lus10030189.g/Lus10011093.g/Lus10025904.g/Lus10040120.g/Lus10041794.g/Lus10042424.g/Lus10040739.g/Lus10017676.g/scaffold176.57/Lus10018263.g/Lus10018654.g/Lus10038158.g/Lus10041951.g/Lus10001670.g/Lus10035011.g/Lus10003147.g/Lus10021158.g/Lus10011000.g/Lus10024315.g/Lus10016601.g	26
GO:0060627	BP	regulation of vesicle-mediated transport	6/2242	55/32470	0.177424	0.636211	0.583447	Lus10002478.g/Lus10029873.g/Lus10001254.g/Lus10020672.g/Lus10037826.g/Lus10040349.g	6
GO:0046128	BP	purine ribonucleoside metabolic process	7/2242	67/32470	0.178549	0.636211	0.583447	Lus10001862.g/Lus10040973.g/Lus10037672.g/Lus10022102.g/Lus10035083.g/Lus10015966.g/Lus10023021.g	7
GO:0008234	MF	cysteine-type peptidase activity	16/2242	180/32470	0.180193	0.636211	0.583447	Lus10037951.g/Lus10024599.g/Lus10032236.g/Lus10002103.g/Lus10020445.g/Lus10024303.g/Lus10034895.g/Lus10028797.g/Lus10033243.g/Lus10006130.g/Lus10031049.g/Lus10017487.g/Lus10024446.g/Lus10005193.g/Lus10042078.g/Lus10033428.g	16
GO:1902600	BP	proton transmembrane transport	10/2242	104/32470	0.180938	0.636211	0.583447	Lus10010618.g/Lus10026946.g/Lus10026944.g/Lus10010623.g/Lus10033179.g/Lus10033934.g/Lus10010619.g/Lus10042445.g/Lus10003259.g/Lus10033382.g	10
GO:0050662	MF	coenzyme binding	46/2242	580/32470	0.182532	0.636211	0.583447	Lus10032078.g/Lus10003845.g/Lus10014614.g/Lus10034963.g/Lus10026471.g/Lus10003780.g/C8303341.1/Lus10041031.g/Lus10019967.g/Lus10020908.g/Lus10009009.g/Lus10024289.g/Lus10032854.g/Lus10029955.g/Lus10011093.g/Lus10022903.g/scaffold380.27/scaffold176.57/Lus10034468.g/Lus10018654.g/Lus10041393.g/Lus10034306.g/Lus10004028.g/Lus10023366.g/Lus10006885.g/Lus10024038.g/Lus10012964.g/Lus10038440.g/Lus10003…	46
GO:0016567	BP	protein ubiquitination	28/2242	339/32470	0.187042	0.636211	0.583447	Lus10017257.g/Lus10030599.g/Lus10025885.g/Lus10005220.g/Lus10035332.g/Lus10003792.g/Lus10019908.g/Lus10024093.g/Lus10013235.g/Lus10006638.g/Lus10030597.g/Lus10036739.g/Lus10030891.g/Lus10000513.g/Lus10030755.g/scaffold127.46/Lus10039197.g/Lus10039470.g/Lus10038982.g/Lus10003698.g/Lus10026104.g/Lus10013745.g/Lus10025715.g/Lus10021683.g/Lus10027282.g/Lus10029267.g/Lus10035023.g/Lus10038219.g	28
GO:0009755	BP	hormone-mediated signaling pathway	33/2242	406/32470	0.187633	0.636211	0.583447	Lus10042731.g/Lus10011824.g/Lus10027969.g/scaffold732.45/Lus10021190.g/Lus10020719.g/scaffold1202.11/Lus10005619.g/Lus10000659.g/Lus10028001.g/Lus10002900.g/Lus10036667.g/Lus10014657.g/Lus10011929.g/Lus10020193.g/Lus10039911.g/Lus10002028.g/Lus10017251.g/Lus10012421.g/Lus10019940.g/Lus10043200.g/Lus10041075.g/Lus10026994.g/Lus10041093.g/Lus10015009.g/Lus10011261.g/Lus10027639.g/Lus10035801.g/Lus1…	33
GO:0009309	BP	amine biosynthetic process	6/2242	56/32470	0.187962	0.636211	0.583447	Lus10003398.g/Lus10019016.g/Lus10040973.g/Lus10035083.g/Lus10030629.g/Lus10029843.g	6
GO:0042401	BP	cellular biogenic amine biosynthetic process	6/2242	56/32470	0.187962	0.636211	0.583447	Lus10003398.g/Lus10019016.g/Lus10040973.g/Lus10035083.g/Lus10030629.g/Lus10029843.g	6
GO:0048609	BP	multicellular organismal reproductive process	6/2242	56/32470	0.187962	0.636211	0.583447	Lus10020719.g/Lus10022060.g/Lus10043200.g/Lus10000672.g/Lus10019636.g/Lus10031396.g	6
GO:1901565	BP	organonitrogen compound catabolic process	77/2242	1007/32470	0.188367	0.636211	0.583447	Lus10024484.g/Lus10037951.g/Lus10016369.g/Lus10024599.g/Lus10014658.g/Lus10019755.g/Lus10028135.g/Lus10041000.g/Lus10028700.g/Lus10026054.g/Lus10042839.g/Lus10022706.g/Lus10035041.g/Lus10024303.g/Lus10034895.g/scaffold251.59/Lus10011345.g/Lus10014347.g/Lus10007466.g/Lus10036993.g/Lus10028797.g/Lus10031171.g/Lus10041348.g/Lus10039372.g/Lus10004024.g/Lus10010866.g/Lus10014208.g/Lus10033472.g/Lus100…	77
GO:0000782	CC	telomere cap complex	3/2242	22/32470	0.191342	0.636211	0.583447	Lus10010844.g/Lus10011320.g/Lus10023406.g	3
GO:0000783	CC	nuclear telomere cap complex	3/2242	22/32470	0.191342	0.636211	0.583447	Lus10010844.g/Lus10011320.g/Lus10023406.g	3
GO:0032147	BP	activation of protein kinase activity	3/2242	22/32470	0.191342	0.636211	0.583447	Lus10022265.g/Lus10001137.g/Lus10007022.g	3
GO:0035434	BP	copper ion transmembrane transport	3/2242	22/32470	0.191342	0.636211	0.583447	Lus10009789.g/Lus10009819.g/Lus10040925.g	3
GO:0005615	CC	extracellular space	9/2242	93/32470	0.192178	0.636211	0.583447	Lus10037951.g/Lus10032754.g/Lus10024303.g/Lus10034895.g/Lus10028797.g/Lus10006130.g/Lus10033808.g/Lus10002792.g/Lus10005087.g	9
GO:0006813	BP	potassium ion transport	9/2242	93/32470	0.192178	0.636211	0.583447	scaffold156.172/Lus10032154.g/Lus10018324.g/Lus10019442.g/Lus10003611.g/Lus10014531.g/Lus10037904.g/Lus10009829.g/Lus10043298.g	9
GO:0044106	BP	cellular amine metabolic process	9/2242	93/32470	0.192178	0.636211	0.583447	Lus10003398.g/Lus10019016.g/Lus10040973.g/Lus10035083.g/Lus10019822.g/Lus10030629.g/Lus10014091.g/Lus10029843.g/Lus10014092.g	9
GO:0000257	MF	nitrilase activity	1/2242	3/32470	0.193177	0.636211	0.583447	Lus10021322.g	1
GO:0001727	MF	lipid kinase activity	1/2242	3/32470	0.193177	0.636211	0.583447	Lus10011246.g	1
GO:0001729	MF	ceramide kinase activity	1/2242	3/32470	0.193177	0.636211	0.583447	Lus10011246.g	1
GO:0003919	MF	FMN adenylyltransferase activity	1/2242	3/32470	0.193177	0.636211	0.583447	Lus10018906.g	1
GO:0004126	MF	cytidine deaminase activity	1/2242	3/32470	0.193177	0.636211	0.583447	scaffold251.59	1
GO:0004328	MF	formamidase activity	1/2242	3/32470	0.193177	0.636211	0.583447	Lus10011528.g	1
GO:0004844	MF	uracil DNA N-glycosylase activity	1/2242	3/32470	0.193177	0.636211	0.583447	Lus10019712.g	1
GO:0005290	MF	L-histidine transmembrane transporter activity	1/2242	3/32470	0.193177	0.636211	0.583447	Lus10037544.g	1
GO:0005673	CC	transcription factor TFIIE complex	1/2242	3/32470	0.193177	0.636211	0.583447	Lus10005100.g	1
GO:0006195	BP	purine nucleotide catabolic process	1/2242	3/32470	0.193177	0.636211	0.583447	Lus10029160.g	1
GO:0006203	BP	dGTP catabolic process	1/2242	3/32470	0.193177	0.636211	0.583447	Lus10029160.g	1
GO:0006216	BP	cytidine catabolic process	1/2242	3/32470	0.193177	0.636211	0.583447	scaffold251.59	1
GO:0006269	BP	DNA replication, synthesis of RNA primer	1/2242	3/32470	0.193177	0.636211	0.583447	Lus10006088.g	1
GO:0006651	BP	diacylglycerol biosynthetic process	1/2242	3/32470	0.193177	0.636211	0.583447	Lus10026489.g	1
GO:0006706	BP	steroid catabolic process	1/2242	3/32470	0.193177	0.636211	0.583447	Lus10024927.g	1
GO:0007229	BP	integrin-mediated signaling pathway	1/2242	3/32470	0.193177	0.636211	0.583447	Lus10008350.g	1
GO:0008053	BP	mitochondrial fusion	1/2242	3/32470	0.193177	0.636211	0.583447	Lus10016516.g	1
GO:0008891	MF	glycolate oxidase activity	1/2242	3/32470	0.193177	0.636211	0.583447	Lus10023302.g	1
GO:0009068	BP	aspartate family amino acid catabolic process	1/2242	3/32470	0.193177	0.636211	0.583447	Lus10014658.g	1
GO:0009146	BP	purine nucleoside triphosphate catabolic process	1/2242	3/32470	0.193177	0.636211	0.583447	Lus10029160.g	1
GO:0009151	BP	purine deoxyribonucleotide metabolic process	1/2242	3/32470	0.193177	0.636211	0.583447	Lus10029160.g	1
GO:0009155	BP	purine deoxyribonucleotide catabolic process	1/2242	3/32470	0.193177	0.636211	0.583447	Lus10029160.g	1
GO:0009215	BP	purine deoxyribonucleoside triphosphate metabolic process	1/2242	3/32470	0.193177	0.636211	0.583447	Lus10029160.g	1
GO:0009217	BP	purine deoxyribonucleoside triphosphate catabolic process	1/2242	3/32470	0.193177	0.636211	0.583447	Lus10029160.g	1
GO:0009574	CC	preprophase band	1/2242	3/32470	0.193177	0.636211	0.583447	scaffold161.1	1
GO:0009823	BP	cytokinin catabolic process	1/2242	3/32470	0.193177	0.636211	0.583447	Lus10018038.g	1
GO:0009945	BP	radial axis specification	1/2242	3/32470	0.193177	0.636211	0.583447	Lus10004646.g	1
GO:0009972	BP	cytidine deamination	1/2242	3/32470	0.193177	0.636211	0.583447	scaffold251.59	1
GO:0010018	BP	far-red light signaling pathway	1/2242	3/32470	0.193177	0.636211	0.583447	Lus10003810.g	1
GO:0010030	BP	positive regulation of seed germination	1/2242	3/32470	0.193177	0.636211	0.583447	Lus10027477.g	1
GO:0010047	BP	fruit dehiscence	1/2242	3/32470	0.193177	0.636211	0.583447	Lus10043200.g	1
GO:0010115	BP	regulation of abscisic acid biosynthetic process	1/2242	3/32470	0.193177	0.636211	0.583447	Lus10016354.g	1
GO:0010117	BP	photoprotection	1/2242	3/32470	0.193177	0.636211	0.583447	Lus10011777.g	1
GO:0010201	BP	response to continuous far red light stimulus by the high-irradiance response system	1/2242	3/32470	0.193177	0.636211	0.583447	Lus10021270.g	1
GO:0010309	MF	acireductone dioxygenase [iron(II)-requiring] activity	1/2242	3/32470	0.193177	0.636211	0.583447	Lus10021902.g	1
GO:0010599	BP	production of lsiRNA involved in RNA interference	1/2242	3/32470	0.193177	0.636211	0.583447	Lus10037136.g	1
GO:0015211	MF	purine nucleoside transmembrane transporter activity	1/2242	3/32470	0.193177	0.636211	0.583447	Lus10008572.g	1
GO:0015228	MF	coenzyme A transmembrane transporter activity	1/2242	3/32470	0.193177	0.636211	0.583447	Lus10008572.g	1
GO:0015809	BP	arginine transport	1/2242	3/32470	0.193177	0.636211	0.583447	Lus10037544.g	1
GO:0016127	BP	sterol catabolic process	1/2242	3/32470	0.193177	0.636211	0.583447	Lus10024927.g	1
GO:0016595	MF	glutamate binding	1/2242	3/32470	0.193177	0.636211	0.583447	Lus10022085.g	1
GO:0016723	MF	oxidoreductase activity, oxidizing metal ions, NAD or NADP as acceptor	1/2242	3/32470	0.193177	0.636211	0.583447	Lus10025484.g	1
GO:0016815	MF	hydrolase activity, acting on carbon-nitrogen (but not peptide) bonds, in nitriles	1/2242	3/32470	0.193177	0.636211	0.583447	Lus10021322.g	1
GO:0019310	BP	inositol catabolic process	1/2242	3/32470	0.193177	0.636211	0.583447	Lus10006198.g	1
GO:0019374	BP	galactolipid metabolic process	1/2242	3/32470	0.193177	0.636211	0.583447	Lus10020672.g	1
GO:0019375	BP	galactolipid biosynthetic process	1/2242	3/32470	0.193177	0.636211	0.583447	Lus10020672.g	1
GO:0030366	MF	molybdopterin synthase activity	1/2242	3/32470	0.193177	0.636211	0.583447	Lus10041075.g	1
GO:0030586	MF	[methionine synthase] reductase activity	1/2242	3/32470	0.193177	0.636211	0.583447	Lus10025484.g	1
GO:0032138	MF	single base insertion or deletion binding	1/2242	3/32470	0.193177	0.636211	0.583447	Lus10017724.g	1
GO:0032456	BP	endocytic recycling	1/2242	3/32470	0.193177	0.636211	0.583447	Lus10043181.g	1
GO:0034433	BP	steroid esterification	1/2242	3/32470	0.193177	0.636211	0.583447	Lus10024927.g	1
GO:0034434	BP	sterol esterification	1/2242	3/32470	0.193177	0.636211	0.583447	Lus10024927.g	1
GO:0035349	BP	coenzyme A transmembrane transport	1/2242	3/32470	0.193177	0.636211	0.583447	Lus10008572.g	1
GO:0035494	BP	SNARE complex disassembly	1/2242	3/32470	0.193177	0.636211	0.583447	Lus10012211.g	1
GO:0042407	BP	cristae formation	1/2242	3/32470	0.193177	0.636211	0.583447	Lus10016516.g	1
GO:0042732	BP	D-xylose metabolic process	1/2242	3/32470	0.193177	0.636211	0.583447	Lus10005450.g	1
GO:0043047	MF	single-stranded telomeric DNA binding	1/2242	3/32470	0.193177	0.636211	0.583447	Lus10016644.g	1
GO:0044183	MF	protein folding chaperone	1/2242	3/32470	0.193177	0.636211	0.583447	Lus10009941.g	1
GO:0045041	BP	protein import into mitochondrial intermembrane space	1/2242	3/32470	0.193177	0.636211	0.583447	Lus10016516.g	1
GO:0045117	BP	azole transport	1/2242	3/32470	0.193177	0.636211	0.583447	Lus10037544.g	1
GO:0045118	MF	azole transmembrane transporter activity	1/2242	3/32470	0.193177	0.636211	0.583447	Lus10037544.g	1
GO:0045335	CC	phagocytic vesicle	1/2242	3/32470	0.193177	0.636211	0.583447	Lus10041310.g	1
GO:0045792	BP	negative regulation of cell size	1/2242	3/32470	0.193177	0.636211	0.583447	Lus10022636.g	1
GO:0046070	BP	dGTP metabolic process	1/2242	3/32470	0.193177	0.636211	0.583447	Lus10029160.g	1
GO:0046087	BP	cytidine metabolic process	1/2242	3/32470	0.193177	0.636211	0.583447	scaffold251.59	1
GO:0046339	BP	diacylglycerol metabolic process	1/2242	3/32470	0.193177	0.636211	0.583447	Lus10026489.g	1
GO:0046386	BP	deoxyribose phosphate catabolic process	1/2242	3/32470	0.193177	0.636211	0.583447	Lus10029160.g	1
GO:0050113	MF	inositol oxygenase activity	1/2242	3/32470	0.193177	0.636211	0.583447	Lus10006198.g	1
GO:0052635	MF	C-20 gibberellin 2-beta-dioxygenase activity	1/2242	3/32470	0.193177	0.636211	0.583447	Lus10006759.g	1
GO:0070206	BP	protein trimerization	1/2242	3/32470	0.193177	0.636211	0.583447	Lus10014795.g	1
GO:0071077	MF	adenosine 3',5'-bisphosphate transmembrane transporter activity	1/2242	3/32470	0.193177	0.636211	0.583447	Lus10008572.g	1
GO:0071106	BP	adenosine 3',5'-bisphosphate transmembrane transport	1/2242	3/32470	0.193177	0.636211	0.583447	Lus10008572.g	1
GO:0071156	BP	regulation of cell cycle arrest	1/2242	3/32470	0.193177	0.636211	0.583447	Lus10019636.g	1
GO:0071158	BP	positive regulation of cell cycle arrest	1/2242	3/32470	0.193177	0.636211	0.583447	Lus10019636.g	1
GO:0071435	BP	potassium ion export across plasma membrane	1/2242	3/32470	0.193177	0.636211	0.583447	Lus10003611.g	1
GO:0071490	BP	cellular response to far red light	1/2242	3/32470	0.193177	0.636211	0.583447	Lus10003810.g	1
GO:0080095	MF	phosphatidylethanolamine-sterol O-acyltransferase activity	1/2242	3/32470	0.193177	0.636211	0.583447	Lus10024927.g	1
GO:0080096	MF	phosphatidate-sterol O-acyltransferase activity	1/2242	3/32470	0.193177	0.636211	0.583447	Lus10024927.g	1
GO:0089709	BP	L-histidine transmembrane transport	1/2242	3/32470	0.193177	0.636211	0.583447	Lus10037544.g	1
GO:0097506	MF	deaminated base DNA N-glycosylase activity	1/2242	3/32470	0.193177	0.636211	0.583447	Lus10019712.g	1
GO:0098847	MF	sequence-specific single stranded DNA binding	1/2242	3/32470	0.193177	0.636211	0.583447	Lus10016644.g	1
GO:1901474	MF	azole transmembrane transporter activity	1/2242	3/32470	0.193177	0.636211	0.583447	Lus10037544.g	1
GO:1901679	BP	nucleotide transmembrane transport	1/2242	3/32470	0.193177	0.636211	0.583447	Lus10008572.g	1
GO:1902024	BP	L-histidine transport	1/2242	3/32470	0.193177	0.636211	0.583447	Lus10037544.g	1
GO:1902047	BP	polyamine transmembrane transport	1/2242	3/32470	0.193177	0.636211	0.583447	Lus10039180.g	1
GO:1902930	BP	regulation of alcohol biosynthetic process	1/2242	3/32470	0.193177	0.636211	0.583447	Lus10016354.g	1
GO:1903826	BP	arginine transmembrane transport	1/2242	3/32470	0.193177	0.636211	0.583447	Lus10037544.g	1
GO:1990457	CC	pexophagosome	1/2242	3/32470	0.193177	0.636211	0.583447	Lus10041310.g	1
GO:1990822	BP	basic amino acid transmembrane transport	1/2242	3/32470	0.193177	0.636211	0.583447	Lus10037544.g	1
GO:2000027	BP	regulation of animal organ morphogenesis	1/2242	3/32470	0.193177	0.636211	0.583447	Lus10007231.g	1
GO:0031047	BP	gene silencing by RNA	8/2242	81/32470	0.195374	0.639072	0.586071	Lus10000951.g/Lus10001012.g/Lus10012965.g/Lus10037136.g/Lus10021918.g/Lus10021917.g/Lus10019588.g/Lus10027113.g	8
GO:0009266	BP	response to temperature stimulus	13/2242	144/32470	0.195599	0.639072	0.586071	Lus10005134.g/scaffold370.2/Lus10005652.g/Lus10002733.g/Lus10008652.g/Lus10037032.g/Lus10017977.g/Lus10035670.g/Lus10016273.g/Lus10032127.g/Lus10016354.g/Lus10041018.g/Lus10021827.g	13
GO:0051239	BP	regulation of multicellular organismal process	17/2242	196/32470	0.197311	0.639072	0.586071	Lus10021369.g/Lus10005106.g/Lus10017223.g/Lus10000659.g/Lus10028001.g/Lus10017049.g/Lus10002900.g/Lus10035472.g/Lus10007231.g/Lus10037032.g/Lus10027404.g/Lus10002028.g/Lus10041721.g/Lus10007459.g/Lus10043200.g/Lus10027477.g/Lus10019636.g	17
GO:0009892	BP	negative regulation of metabolic process	34/2242	422/32470	0.197321	0.639072	0.586071	Lus10005134.g/scaffold732.45/scaffold370.2/Lus10021767.g/Lus10012202.g/Lus10008007.g/Lus10019348.g/Lus10007849.g/Lus10021940.g/Lus10011929.g/Lus10009351.g/Lus10000951.g/Lus10039911.g/Lus10004759.g/Lus10001012.g/Lus10012965.g/Lus10043200.g/Lus10029713.g/Lus10037136.g/Lus10021918.g/Lus10027639.g/Lus10018061.g/Lus10021917.g/Lus10017724.g/Lus10023619.g/Lus10008129.g/Lus10019588.g/Lus10024485.g/Lus100…	34
GO:0008219	BP	cell death	7/2242	69/32470	0.197755	0.639072	0.586071	Lus10003660.g/Lus10035832.g/Lus10021940.g/Lus10041348.g/Lus10037370.g/Lus10010133.g/scaffold847.22	7
GO:0005249	MF	voltage-gated potassium channel activity	6/2242	57/32470	0.198736	0.639072	0.586071	Lus10005221.g/Lus10019442.g/Lus10031320.g/Lus10031891.g/Lus10037904.g/Lus10043298.g	6
GO:0001906	BP	cell killing	2/2242	12/32470	0.199052	0.639072	0.586071	Lus10004289.g/Lus10019227.g	2
GO:0003854	MF	3-beta-hydroxy-delta5-steroid dehydrogenase activity	2/2242	12/32470	0.199052	0.639072	0.586071	Lus10008775.g/Lus10008774.g	2
GO:0003973	MF	(S)-2-hydroxy-acid oxidase activity	2/2242	12/32470	0.199052	0.639072	0.586071	Lus10038507.g/Lus10023302.g	2
GO:0004075	MF	biotin carboxylase activity	2/2242	12/32470	0.199052	0.639072	0.586071	Lus10022077.g/Lus10022078.g	2
GO:0005786	CC	signal recognition particle, endoplasmic reticulum targeting	2/2242	12/32470	0.199052	0.639072	0.586071	Lus10017891.g/Lus10040614.g	2
GO:0008216	BP	spermidine metabolic process	2/2242	12/32470	0.199052	0.639072	0.586071	Lus10040973.g/Lus10035083.g	2
GO:0008295	BP	spermidine biosynthetic process	2/2242	12/32470	0.199052	0.639072	0.586071	Lus10040973.g/Lus10035083.g	2
GO:0008878	MF	glucose-1-phosphate adenylyltransferase activity	2/2242	12/32470	0.199052	0.639072	0.586071	Lus10023553.g/Lus10040437.g	2
GO:0009816	BP	defense response to bacterium, incompatible interaction	2/2242	12/32470	0.199052	0.639072	0.586071	Lus10041348.g/Lus10037370.g	2
GO:0010214	BP	seed coat development	2/2242	12/32470	0.199052	0.639072	0.586071	Lus10035662.g/Lus10027477.g	2
GO:0010267	BP	production of ta-siRNAs involved in RNA interference	2/2242	12/32470	0.199052	0.639072	0.586071	Lus10037136.g/Lus10027113.g	2
GO:0031640	BP	killing of cells of other organism	2/2242	12/32470	0.199052	0.639072	0.586071	Lus10004289.g/Lus10019227.g	2
GO:0043733	MF	DNA-3-methylbase glycosylase activity	2/2242	12/32470	0.199052	0.639072	0.586071	Lus10019712.g/Lus10041749.g	2
GO:0044364	BP	disruption of cells of other organism	2/2242	12/32470	0.199052	0.639072	0.586071	Lus10004289.g/Lus10019227.g	2
GO:0048017	BP	inositol lipid-mediated signaling	2/2242	12/32470	0.199052	0.639072	0.586071	Lus10029873.g/Lus10020672.g	2
GO:0048441	BP	petal development	2/2242	12/32470	0.199052	0.639072	0.586071	scaffold272.125/Lus10041794.g	2
GO:0048465	BP	corolla development	2/2242	12/32470	0.199052	0.639072	0.586071	scaffold272.125/Lus10041794.g	2
GO:0052381	MF	tRNA dimethylallyltransferase activity	2/2242	12/32470	0.199052	0.639072	0.586071	Lus10006281.g/Lus10020566.g	2
GO:2001252	BP	positive regulation of chromosome organization	2/2242	12/32470	0.199052	0.639072	0.586071	Lus10010733.g/Lus10036678.g	2
GO:0019752	BP	carboxylic acid metabolic process	115/2242	1540/32470	0.199081	0.639072	0.586071	Lus10004697.g/Lus10014407.g/Lus10016083.g/Lus10017934.g/Lus10024583.g/Lus10040264.g/Lus10022137.g/Lus10014658.g/Lus10034963.g/Lus10039861.g/Lus10028135.g/Lus10039278.g/scaffold338.16/Lus10033661.g/Lus10001018.g/scaffold1247.34/Lus10002191.g/Lus10001016.g/Lus10008521.g/Lus10041003.g/C8303341.1/Lus10039994.g/Lus10004696.g/Lus10007247.g/Lus10028572.g/Lus10020908.g/Lus10006058.g/Lus10042839.g/Lus1004…	115
GO:0044283	BP	small molecule biosynthetic process	57/2242	736/32470	0.199976	0.641321	0.588133	Lus10004697.g/Lus10014407.g/Lus10040264.g/Lus10014658.g/Lus10039278.g/Lus10001018.g/Lus10002191.g/Lus10001016.g/Lus10008521.g/C8303341.1/Lus10004696.g/Lus10000692.g/Lus10006058.g/Lus10040263.g/Lus10001019.g/Lus10027515.g/Lus10029955.g/Lus10019671.g/Lus10018594.g/Lus10037544.g/Lus10004694.g/scaffold464.140/Lus10014765.g/Lus10028171.g/Lus10040262.g/Lus10040739.g/Lus10030158.g/Lus10012536.g/Lus10015…	57
GO:0005315	MF	inorganic phosphate transmembrane transporter activity	4/2242	34/32470	0.205325	0.656564	0.602112	Lus10033886.g/Lus10003560.g/Lus10011826.g/scaffold610.41	4
GO:0019252	BP	starch biosynthetic process	4/2242	34/32470	0.205325	0.656564	0.602112	Lus10012264.g/Lus10023553.g/Lus10034595.g/Lus10040437.g	4
GO:0033177	CC	proton-transporting two-sector ATPase complex, proton-transporting domain	4/2242	34/32470	0.205325	0.656564	0.602112	Lus10010618.g/Lus10010623.g/Lus10033179.g/Lus10010619.g	4
GO:0004683	MF	calmodulin-dependent protein kinase activity	11/2242	120/32470	0.206469	0.659155	0.604488	Lus10011824.g/Lus10021190.g/scaffold1202.11/scaffold10.1/Lus10005619.g/Lus10036667.g/Lus10014657.g/Lus10017251.g/Lus10041093.g/Lus10015009.g/Lus10035801.g	11
GO:0090575	CC	RNA polymerase II transcription factor complex	7/2242	70/32470	0.207649	0.659155	0.604488	Lus10011326.g/Lus10012202.g/Lus10038448.g/Lus10023358.g/Lus10007763.g/Lus10005100.g/Lus10030137.g	7
GO:0032446	BP	protein modification by small protein conjugation	30/2242	371/32470	0.208811	0.659155	0.604488	Lus10017257.g/Lus10030599.g/Lus10025885.g/Lus10009739.g/Lus10005220.g/Lus10035332.g/Lus10003792.g/Lus10019908.g/Lus10024093.g/Lus10013235.g/Lus10006638.g/Lus10030597.g/Lus10036739.g/Lus10041378.g/Lus10030891.g/Lus10000513.g/Lus10030755.g/scaffold127.46/Lus10039197.g/Lus10039470.g/Lus10038982.g/Lus10003698.g/Lus10026104.g/Lus10013745.g/Lus10025715.g/Lus10021683.g/Lus10027282.g/Lus10029267.g/Lus100…	30
GO:0046777	BP	protein autophosphorylation	9/2242	95/32470	0.208933	0.659155	0.604488	Lus10011824.g/Lus10021190.g/scaffold1202.11/Lus10005619.g/Lus10036667.g/Lus10014657.g/Lus10017251.g/Lus10041093.g/Lus10015009.g	9
GO:0042802	MF	identical protein binding	13/2242	146/32470	0.209008	0.659155	0.604488	Lus10022137.g/Lus10022225.g/Lus10007849.g/Lus10020170.g/Lus10004759.g/Lus10035332.g/Lus10003810.g/Lus10037630.g/Lus10003611.g/Lus10021270.g/Lus10010505.g/Lus10009086.g/Lus10026973.g	13
GO:0070887	BP	cellular response to chemical stimulus	44/2242	561/32470	0.209293	0.659155	0.604488	Lus10042731.g/Lus10011824.g/Lus10035730.g/Lus10027969.g/scaffold732.45/Lus10021190.g/Lus10020719.g/scaffold1202.11/Lus10005619.g/Lus10000659.g/Lus10026878.g/Lus10028001.g/Lus10002900.g/Lus10036667.g/Lus10021940.g/Lus10037032.g/Lus10014657.g/Lus10011929.g/Lus10020193.g/Lus10039911.g/Lus10002028.g/Lus10017251.g/Lus10003437.g/Lus10025845.g/Lus10012421.g/Lus10019940.g/Lus10043200.g/Lus10041075.g/Lus1…	44
GO:0006002	BP	fructose 6-phosphate metabolic process	3/2242	23/32470	0.209526	0.659155	0.604488	Lus10039994.g/scaffold34.66/Lus10008812.g	3
GO:0009240	BP	isopentenyl diphosphate biosynthetic process	3/2242	23/32470	0.209526	0.659155	0.604488	Lus10002356.g/Lus10003149.g/Lus10026322.g	3
GO:0010997	MF	anaphase-promoting complex binding	3/2242	23/32470	0.209526	0.659155	0.604488	Lus10034687.g/Lus10006853.g/Lus10037595.g	3
GO:0015266	MF	protein transmembrane transporter activity	3/2242	23/32470	0.209526	0.659155	0.604488	Lus10007878.g/Lus10016878.g/Lus10013127.g	3
GO:0019344	BP	cysteine biosynthetic process	3/2242	23/32470	0.209526	0.659155	0.604488	Lus10014765.g/Lus10015947.g/Lus10004118.g	3
GO:0046490	BP	isopentenyl diphosphate metabolic process	3/2242	23/32470	0.209526	0.659155	0.604488	Lus10002356.g/Lus10003149.g/Lus10026322.g	3
GO:0055106	MF	ubiquitin-protein transferase regulator activity	3/2242	23/32470	0.209526	0.659155	0.604488	Lus10034687.g/Lus10006853.g/Lus10037595.g	3
GO:0097027	MF	ubiquitin-protein transferase activator activity	3/2242	23/32470	0.209526	0.659155	0.604488	Lus10034687.g/Lus10006853.g/Lus10037595.g	3
GO:0008283	BP	cell proliferation	5/2242	46/32470	0.209658	0.659155	0.604488	Lus10027716.g/Lus10007849.g/Lus10004759.g/Lus10043200.g/Lus10011721.g	5
GO:0097164	BP	ammonium ion metabolic process	5/2242	46/32470	0.209658	0.659155	0.604488	Lus10003398.g/Lus10033706.g/Lus10031634.g/Lus10040973.g/Lus10035083.g	5
GO:0007131	BP	reciprocal meiotic recombination	6/2242	58/32470	0.209731	0.659155	0.604488	Lus10041143.g/Lus10010242.g/Lus10016644.g/Lus10036517.g/Lus10017724.g/Lus10039383.g	6
GO:0035825	BP	homologous recombination	6/2242	58/32470	0.209731	0.659155	0.604488	Lus10041143.g/Lus10010242.g/Lus10016644.g/Lus10036517.g/Lus10017724.g/Lus10039383.g	6
GO:0071310	BP	cellular response to organic substance	37/2242	466/32470	0.210293	0.660292	0.605531	Lus10042731.g/Lus10011824.g/Lus10027969.g/scaffold732.45/Lus10021190.g/Lus10020719.g/scaffold1202.11/Lus10005619.g/Lus10000659.g/Lus10028001.g/Lus10002900.g/Lus10036667.g/Lus10037032.g/Lus10014657.g/Lus10011929.g/Lus10020193.g/Lus10039911.g/Lus10002028.g/Lus10017251.g/Lus10012421.g/Lus10019940.g/Lus10043200.g/Lus10041075.g/Lus10026994.g/Lus10037136.g/Lus10041093.g/Lus10015009.g/Lus10011261.g/Lus1…	37
GO:0007275	BP	multicellular organism development	83/2242	1100/32470	0.212366	0.666168	0.610919	Lus10000310.g/Lus10015754.g/Lus10042731.g/Lus10030446.g/Lus10016056.g/scaffold272.125/Lus10027969.g/Lus10011335.g/Lus10021369.g/Lus10041310.g/Lus10020719.g/Lus10005106.g/Lus10041618.g/Lus10008098.g/Lus10017223.g/Lus10000659.g/Lus10006369.g/Lus10028001.g/Lus10017049.g/Lus10002900.g/Lus10040415.g/Lus10035472.g/Lus10022225.g/Lus10002500.g/Lus10031826.g/Lus10007231.g/Lus10029876.g/Lus10026617.g/Lus10…	83
GO:0033692	BP	cellular polysaccharide biosynthetic process	19/2242	225/32470	0.21265	0.666425	0.611155	Lus10032415.g/Lus10027725.g/Lus10012264.g/Lus10023057.g/Lus10023553.g/Lus10034595.g/Lus10011360.g/Lus10020750.g/Lus10016012.g/Lus10037469.g/Lus10034664.g/Lus10010268.g/Lus10023056.g/Lus10040437.g/Lus10007327.g/Lus10017868.g/Lus10039607.g/Lus10037026.g/Lus10029049.g	19
GO:0042803	MF	protein homodimerization activity	8/2242	83/32470	0.213577	0.668696	0.613238	Lus10022225.g/Lus10007849.g/Lus10020170.g/Lus10004759.g/Lus10003611.g/Lus10021270.g/Lus10010505.g/Lus10026973.g	8
GO:0006955	BP	immune response	11/2242	121/32470	0.214015	0.66943	0.613911	Lus10035832.g/Lus10021940.g/Lus10034895.g/Lus10041348.g/Lus10014765.g/Lus10022265.g/Lus10023302.g/Lus10001137.g/Lus10037370.g/Lus10041679.g/Lus10037136.g	11
GO:0010038	BP	response to metal ion	9/2242	96/32470	0.217525	0.679764	0.623388	Lus10035730.g/Lus10016487.g/Lus10040744.g/Lus10009598.g/Lus10037630.g/Lus10043103.g/Lus10019636.g/Lus10002674.g/Lus10008964.g	9
GO:0009648	BP	photoperiodism	4/2242	35/32470	0.220132	0.687262	0.630265	Lus10031826.g/Lus10035332.g/Lus10007459.g/Lus10012657.g	4
GO:0003743	MF	translation initiation factor activity	17/2242	200/32470	0.220525	0.687498	0.630481	Lus10036873.g/Lus10002264.g/Lus10006224.g/Lus10000920.g/Lus10021532.g/Lus10015124.g/Lus10030422.g/Lus10033806.g/Lus10011938.g/Lus10007763.g/Lus10037136.g/Lus10039660.g/Lus10034314.g/Lus10005100.g/Lus10026637.g/Lus10017289.g/Lus10014386.g	17
GO:0000271	BP	polysaccharide biosynthetic process	21/2242	253/32470	0.220624	0.687498	0.630481	Lus10032415.g/Lus10027725.g/Lus10012264.g/Lus10023057.g/Lus10023553.g/Lus10034595.g/Lus10011360.g/Lus10020750.g/Lus10016012.g/Lus10037469.g/Lus10034664.g/Lus10010268.g/Lus10023056.g/Lus10040437.g/Lus10007327.g/Lus10017868.g/Lus10018554.g/Lus10039607.g/Lus10037026.g/scaffold82.22/Lus10029049.g	21
GO:0015994	BP	chlorophyll metabolic process	6/2242	59/32470	0.220933	0.687812	0.630768	Lus10024484.g/Lus10016369.g/Lus10019755.g/Lus10041348.g/Lus10039372.g/Lus10037370.g	6
GO:0043094	BP	cellular metabolic compound salvage	8/2242	84/32470	0.222914	0.690999	0.633691	Lus10009040.g/Lus10023302.g/Lus10009678.g/Lus10021902.g/Lus10001497.g/Lus10037552.g/Lus10015966.g/Lus10023021.g	8
GO:0044459	CC	plasma membrane part	49/2242	634/32470	0.224526	0.690999	0.633691	Lus10000310.g/Lus10015754.g/Lus10040652.g/Lus10011335.g/Lus10033814.g/Lus10009196.g/Lus10029966.g/Lus10026946.g/Lus10007691.g/Lus10005221.g/Lus10035354.g/Lus10033386.g/Lus10011288.g/Lus10001334.g/Lus10037895.g/Lus10042040.g/Lus10029970.g/Lus10009789.g/Lus10018692.g/Lus10035281.g/Lus10011826.g/Lus10034840.g/scaffold115.10/Lus10026944.g/Lus10020750.g/scaffold610.41/Lus10037469.g/Lus10031320.g/Lus10…	49
GO:0003905	MF	alkylbase DNA N-glycosylase activity	2/2242	13/32470	0.225098	0.690999	0.633691	Lus10019712.g/Lus10041749.g	2
GO:0006777	BP	Mo-molybdopterin cofactor biosynthetic process	2/2242	13/32470	0.225098	0.690999	0.633691	Lus10006989.g/Lus10041075.g	2
GO:0010050	BP	vegetative phase change	2/2242	13/32470	0.225098	0.690999	0.633691	Lus10037136.g/Lus10035801.g	2
GO:0010114	BP	response to red light	2/2242	13/32470	0.225098	0.690999	0.633691	Lus10037819.g/Lus10038823.g	2
GO:0010167	BP	response to nitrate	2/2242	13/32470	0.225098	0.690999	0.633691	Lus10024614.g/Lus10032252.g	2
GO:0016726	MF	oxidoreductase activity, acting on CH or CH2 groups, NAD or NADP as acceptor	2/2242	13/32470	0.225098	0.690999	0.633691	Lus10034306.g/Lus10026322.g	2
GO:0019720	BP	Mo-molybdopterin cofactor metabolic process	2/2242	13/32470	0.225098	0.690999	0.633691	Lus10006989.g/Lus10041075.g	2
GO:0043244	BP	regulation of protein complex disassembly	2/2242	13/32470	0.225098	0.690999	0.633691	Lus10030422.g/Lus10026637.g	2
GO:0043545	BP	molybdopterin cofactor metabolic process	2/2242	13/32470	0.225098	0.690999	0.633691	Lus10006989.g/Lus10041075.g	2
GO:0047372	MF	acylglycerol lipase activity	2/2242	13/32470	0.225098	0.690999	0.633691	Lus10007877.g/Lus10009169.g	2
GO:0051189	BP	prosthetic group metabolic process	2/2242	13/32470	0.225098	0.690999	0.633691	Lus10006989.g/Lus10041075.g	2
GO:0070449	CC	elongin complex	2/2242	13/32470	0.225098	0.690999	0.633691	Lus10027295.g/Lus10033586.g	2
GO:0070461	CC	SAGA-type complex	2/2242	13/32470	0.225098	0.690999	0.633691	Lus10011422.g/Lus10013170.g	2
GO:0003690	MF	double-stranded DNA binding	21/2242	254/32470	0.225926	0.692896	0.635431	Lus10005783.g/Lus10002900.g/Lus10031826.g/Lus10034734.g/Lus10006818.g/Lus10027404.g/Lus10002028.g/Lus10010844.g/Lus10033274.g/Lus10028005.g/Lus10011470.g/Lus10021585.g/Lus10023105.g/Lus10016644.g/Lus10011320.g/Lus10023406.g/Lus10017724.g/Lus10025203.g/Lus10025599.g/Lus10012092.g/Lus10015868.g	21
GO:0005783	CC	endoplasmic reticulum	57/2242	745/32470	0.227002	0.69555	0.637865	Lus10035730.g/Lus10016083.g/Lus10017533.g/Lus10033706.g/Lus10042391.g/Lus10024687.g/Lus10020193.g/Lus10029605.g/Lus10031634.g/Lus10011345.g/scaffold43.21/Lus10005110.g/Lus10025485.g/Lus10037011.g/Lus10015548.g/Lus10028171.g/Lus10033405.g/Lus10030043.g/Lus10019415.g/Lus10003209.g/Lus10006130.g/Lus10032313.g/Lus10015885.g/Lus10014638.g/Lus10036611.g/Lus10042724.g/Lus10026994.g/Lus10016586.g/Lus1002…	57
GO:0008381	MF	mechanosensitive ion channel activity	3/2242	24/32470	0.228068	0.695585	0.637897	Lus10038148.g/Lus10004153.g/Lus10000913.g	3
GO:0019104	MF	DNA N-glycosylase activity	3/2242	24/32470	0.228068	0.695585	0.637897	Lus10019712.g/Lus10025575.g/Lus10041749.g	3
GO:0022833	MF	mechanosensitive ion channel activity	3/2242	24/32470	0.228068	0.695585	0.637897	Lus10038148.g/Lus10004153.g/Lus10000913.g	3
GO:0030677	CC	ribonuclease P complex	3/2242	24/32470	0.228068	0.695585	0.637897	Lus10000951.g/Lus10026483.g/Lus10021917.g	3
GO:0035821	BP	modification of morphology or physiology of other organism	3/2242	24/32470	0.228068	0.695585	0.637897	Lus10004289.g/Lus10037136.g/Lus10019227.g	3
GO:0009116	BP	nucleoside metabolic process	12/2242	136/32470	0.229897	0.700518	0.642421	Lus10009040.g/scaffold251.59/Lus10001862.g/Lus10040973.g/Lus10009678.g/Lus10001497.g/Lus10037672.g/Lus10022102.g/Lus10026287.g/Lus10035083.g/Lus10015966.g/Lus10023021.g	12
GO:0009314	BP	response to radiation	25/2242	309/32470	0.232947	0.709155	0.650341	Lus10005106.g/Lus10005783.g/Lus10017223.g/Lus10006369.g/Lus10002900.g/Lus10035472.g/Lus10037819.g/Lus10031826.g/Lus10038823.g/Lus10006818.g/Lus10002028.g/Lus10037584.g/Lus10035332.g/Lus10011777.g/Lus10007459.g/Lus10003810.g/Lus10012657.g/Lus10021270.g/Lus10043103.g/Lus10021585.g/Lus10017724.g/Lus10004462.g/Lus10041508.g/Lus10031087.g/Lus10015868.g	25
GO:0006534	BP	cysteine metabolic process	4/2242	36/32470	0.23521	0.710199	0.651299	Lus10014765.g/Lus10015947.g/Lus10015966.g/Lus10004118.g	4
GO:0009813	BP	flavonoid biosynthetic process	17/2242	203/32470	0.238687	0.710199	0.651299	Lus10024583.g/scaffold1247.34/Lus10028572.g/Lus10042262.g/scaffold274.9/Lus10039277.g/Lus10003311.g/Lus10031819.g/Lus10014437.g/Lus10019833.g/Lus10042261.g/Lus10013500.g/Lus10019808.g/Lus10014105.g/Lus10023939.g/Lus10018878.g/Lus10041508.g	17
GO:0015078	MF	proton transmembrane transporter activity	20/2242	243/32470	0.238811	0.710199	0.651299	Lus10004819.g/Lus10035507.g/Lus10010618.g/Lus10026946.g/Lus10040674.g/Lus10026944.g/Lus10010623.g/Lus10039131.g/Lus10002490.g/Lus10005934.g/Lus10033179.g/Lus10033934.g/Lus10015268.g/Lus10010619.g/Lus10018989.g/Lus10042445.g/Lus10003259.g/Lus10033382.g/Lus10033840.g/Lus10009829.g	20
GO:0044255	BP	cellular lipid metabolic process	59/2242	777/32470	0.24049	0.710199	0.651299	Lus10016083.g/Lus10039278.g/Lus10002191.g/Lus10028572.g/Lus10000692.g/Lus10040665.g/Lus10020908.g/Lus10006058.g/Lus10018239.g/Lus10033706.g/Lus10027515.g/Lus10019671.g/Lus10024927.g/Lus10031634.g/Lus10011345.g/Lus10029873.g/Lus10014075.g/Lus10018594.g/Lus10013703.g/Lus10028171.g/Lus10035175.g/Lus10012556.g/Lus10006759.g/Lus10040739.g/Lus10006502.g/Lus10005570.g/Lus10015222.g/Lus10039401.g/Lus1002…	59
GO:0099402	BP	plant organ development	29/2242	365/32470	0.2419	0.710199	0.651299	Lus10000310.g/Lus10015754.g/Lus10030446.g/scaffold272.125/Lus10027969.g/Lus10011335.g/Lus10017223.g/Lus10022225.g/Lus10026617.g/Lus10007849.g/Lus10037032.g/Lus10024927.g/Lus10004646.g/Lus10014765.g/Lus10022636.g/Lus10004759.g/Lus10041794.g/Lus10000639.g/Lus10027404.g/Lus10023694.g/Lus10038582.g/Lus10020672.g/Lus10043200.g/Lus10012657.g/Lus10019636.g/Lus10037882.g/Lus10035801.g/Lus10037156.g/Lus10…	29
GO:0005911	CC	cell-cell junction	35/2242	447/32470	0.2429	0.710199	0.651299	Lus10003660.g/Lus10001363.g/Lus10007633.g/Lus10015468.g/Lus10006746.g/Lus10022924.g/Lus10037469.g/Lus10029123.g/Lus10015032.g/Lus10043181.g/Lus10009819.g/scaffold225.31/Lus10020051.g/Lus10040925.g/Lus10027477.g/Lus10041679.g/Lus10021104.g/Lus10003611.g/Lus10042724.g/Lus10027436.g/Lus10029684.g/Lus10014310.g/Lus10010319.g/Lus10009169.g/Lus10040538.g/Lus10033382.g/Lus10023391.g/Lus10035283.g/Lus100…	35
GO:0009506	CC	plasmodesma	35/2242	447/32470	0.2429	0.710199	0.651299	Lus10003660.g/Lus10001363.g/Lus10007633.g/Lus10015468.g/Lus10006746.g/Lus10022924.g/Lus10037469.g/Lus10029123.g/Lus10015032.g/Lus10043181.g/Lus10009819.g/scaffold225.31/Lus10020051.g/Lus10040925.g/Lus10027477.g/Lus10041679.g/Lus10021104.g/Lus10003611.g/Lus10042724.g/Lus10027436.g/Lus10029684.g/Lus10014310.g/Lus10010319.g/Lus10009169.g/Lus10040538.g/Lus10033382.g/Lus10023391.g/Lus10035283.g/Lus100…	35
GO:0055044	CC	symplast	35/2242	447/32470	0.2429	0.710199	0.651299	Lus10003660.g/Lus10001363.g/Lus10007633.g/Lus10015468.g/Lus10006746.g/Lus10022924.g/Lus10037469.g/Lus10029123.g/Lus10015032.g/Lus10043181.g/Lus10009819.g/scaffold225.31/Lus10020051.g/Lus10040925.g/Lus10027477.g/Lus10041679.g/Lus10021104.g/Lus10003611.g/Lus10042724.g/Lus10027436.g/Lus10029684.g/Lus10014310.g/Lus10010319.g/Lus10009169.g/Lus10040538.g/Lus10033382.g/Lus10023391.g/Lus10035283.g/Lus100…	35
GO:0006633	BP	fatty acid biosynthetic process	18/2242	217/32470	0.242915	0.710199	0.651299	Lus10039278.g/Lus10002191.g/Lus10006058.g/Lus10027515.g/Lus10018594.g/Lus10028171.g/Lus10040739.g/Lus10015222.g/Lus10039401.g/Lus10000672.g/Lus10001657.g/Lus10006637.g/Lus10019510.g/scaffold156.218/Lus10039906.g/Lus10031809.g/Lus10031236.g/Lus10018986.g	18
GO:0032504	BP	multicellular organism reproduction	6/2242	61/32470	0.243902	0.710199	0.651299	Lus10020719.g/Lus10022060.g/Lus10043200.g/Lus10000672.g/Lus10019636.g/Lus10031396.g	6
GO:0004144	MF	diacylglycerol O-acyltransferase activity	3/2242	25/32470	0.246899	0.710199	0.651299	Lus10014075.g/Lus10019840.g/Lus10039135.g	3
GO:0009405	BP	pathogenesis	3/2242	25/32470	0.246899	0.710199	0.651299	Lus10022893.g/Lus10005395.g/Lus10016109.g	3
GO:0016471	CC	vacuolar proton-transporting V-type ATPase complex	3/2242	25/32470	0.246899	0.710199	0.651299	Lus10010623.g/Lus10033179.g/Lus10010619.g	3
GO:0016881	MF	acid-amino acid ligase activity	3/2242	25/32470	0.246899	0.710199	0.651299	Lus10012211.g/Lus10004694.g/Lus10040261.g	3
GO:1990391	CC	DNA repair complex	3/2242	25/32470	0.246899	0.710199	0.651299	Lus10034734.g/Lus10033274.g/Lus10017724.g	3
GO:0003684	MF	damaged DNA binding	5/2242	49/32470	0.248383	0.710199	0.651299	Lus10005783.g/Lus10006818.g/Lus10017724.g/Lus10004462.g/Lus10015868.g	5
GO:0000188	BP	inactivation of MAPK activity	1/2242	4/32470	0.248892	0.710199	0.651299	Lus10021940.g	1
GO:0000346	CC	transcription export complex	1/2242	4/32470	0.248892	0.710199	0.651299	Lus10027113.g	1
GO:0000445	CC	THO complex part of transcription export complex	1/2242	4/32470	0.248892	0.710199	0.651299	Lus10027113.g	1
GO:0003955	MF	NAD(P)H dehydrogenase (quinone) activity	1/2242	4/32470	0.248892	0.710199	0.651299	Lus10039505.g	1
GO:0004463	MF	leukotriene-A4 hydrolase activity	1/2242	4/32470	0.248892	0.710199	0.651299	Lus10040988.g	1
GO:0004506	MF	squalene monooxygenase activity	1/2242	4/32470	0.248892	0.710199	0.651299	Lus10018654.g	1
GO:0004607	MF	phosphatidylcholine-sterol O-acyltransferase activity	1/2242	4/32470	0.248892	0.710199	0.651299	Lus10024927.g	1
GO:0004647	MF	phosphoserine phosphatase activity	1/2242	4/32470	0.248892	0.710199	0.651299	Lus10021156.g	1
GO:0005971	CC	ribonucleoside-diphosphate reductase complex	1/2242	4/32470	0.248892	0.710199	0.651299	Lus10018867.g	1
GO:0006007	BP	glucose catabolic process	1/2242	4/32470	0.248892	0.710199	0.651299	Lus10031877.g	1
GO:0008453	MF	alanine-glyoxylate transaminase activity	1/2242	4/32470	0.248892	0.710199	0.651299	Lus10009086.g	1
GO:0008531	MF	riboflavin kinase activity	1/2242	4/32470	0.248892	0.710199	0.651299	Lus10018906.g	1
GO:0008670	MF	2,4-dienoyl-CoA reductase (NADPH) activity	1/2242	4/32470	0.248892	0.710199	0.651299	Lus10017129.g	1
GO:0008897	MF	holo-[acyl-carrier-protein] synthase activity	1/2242	4/32470	0.248892	0.710199	0.651299	Lus10008521.g	1
GO:0009663	BP	plasmodesma organization	1/2242	4/32470	0.248892	0.710199	0.651299	Lus10019636.g	1
GO:0009703	MF	nitrate reductase (NADH) activity	1/2242	4/32470	0.248892	0.710199	0.651299	Lus10005992.g	1
GO:0009939	BP	positive regulation of gibberellic acid mediated signaling pathway	1/2242	4/32470	0.248892	0.710199	0.651299	Lus10027969.g	1
GO:0010031	BP	circumnutation	1/2242	4/32470	0.248892	0.710199	0.651299	Lus10007459.g	1
GO:0010100	BP	negative regulation of photomorphogenesis	1/2242	4/32470	0.248892	0.710199	0.651299	Lus10035472.g	1
GO:0010193	BP	response to ozone	1/2242	4/32470	0.248892	0.710199	0.651299	Lus10021940.g	1
GO:0010344	BP	seed oilbody biogenesis	1/2242	4/32470	0.248892	0.710199	0.651299	Lus10032127.g	1
GO:0010430	BP	fatty acid omega-oxidation	1/2242	4/32470	0.248892	0.710199	0.651299	Lus10003176.g	1
GO:0010731	BP	protein glutathionylation	1/2242	4/32470	0.248892	0.710199	0.651299	Lus10015049.g	1
GO:0010971	BP	positive regulation of G2/M transition of mitotic cell cycle	1/2242	4/32470	0.248892	0.710199	0.651299	Lus10014595.g	1
GO:0016444	BP	somatic cell DNA recombination	1/2242	4/32470	0.248892	0.710199	0.651299	Lus10037630.g	1
GO:0016710	MF	trans-cinnamate 4-monooxygenase activity	1/2242	4/32470	0.248892	0.710199	0.651299	Lus10035011.g	1
GO:0016768	MF	spermine synthase activity	1/2242	4/32470	0.248892	0.710199	0.651299	Lus10003398.g	1
GO:0019878	BP	lysine biosynthetic process via aminoadipic acid	1/2242	4/32470	0.248892	0.710199	0.651299	Lus10008521.g	1
GO:0030123	CC	AP-3 adaptor complex	1/2242	4/32470	0.248892	0.710199	0.651299	Lus10024011.g	1
GO:0030139	CC	endocytic vesicle	1/2242	4/32470	0.248892	0.710199	0.651299	Lus10041310.g	1
GO:0030410	MF	nicotianamine synthase activity	1/2242	4/32470	0.248892	0.710199	0.651299	Lus10029843.g	1
GO:0030417	BP	nicotianamine metabolic process	1/2242	4/32470	0.248892	0.710199	0.651299	Lus10029843.g	1
GO:0030418	BP	nicotianamine biosynthetic process	1/2242	4/32470	0.248892	0.710199	0.651299	Lus10029843.g	1
GO:0031519	CC	PcG protein complex	1/2242	4/32470	0.248892	0.710199	0.651299	Lus10041386.g	1
GO:0031930	BP	mitochondria-nucleus signaling pathway	1/2242	4/32470	0.248892	0.710199	0.651299	Lus10035670.g	1
GO:0033116	CC	endoplasmic reticulum-Golgi intermediate compartment membrane	1/2242	4/32470	0.248892	0.710199	0.651299	Lus10016066.g	1
GO:0033910	MF	glucan 1,4-alpha-maltotetraohydrolase activity	1/2242	4/32470	0.248892	0.710199	0.651299	Lus10030793.g	1
GO:0033946	MF	xyloglucan-specific endo-beta-1,4-glucanase activity	1/2242	4/32470	0.248892	0.710199	0.651299	Lus10037377.g	1
GO:0034330	BP	cell junction organization	1/2242	4/32470	0.248892	0.710199	0.651299	Lus10019636.g	1
GO:0036092	BP	phosphatidylinositol-3-phosphate biosynthetic process	1/2242	4/32470	0.248892	0.710199	0.651299	Lus10037446.g	1
GO:0036361	MF	racemase activity, acting on amino acids and derivatives	1/2242	4/32470	0.248892	0.710199	0.651299	Lus10014492.g	1
GO:0043407	BP	negative regulation of MAP kinase activity	1/2242	4/32470	0.248892	0.710199	0.651299	Lus10021940.g	1
GO:0043409	BP	negative regulation of MAPK cascade	1/2242	4/32470	0.248892	0.710199	0.651299	Lus10021940.g	1
GO:0043916	MF	DNA-7-methylguanine glycosylase activity	1/2242	4/32470	0.248892	0.710199	0.651299	Lus10041749.g	1
GO:0043968	BP	histone H2A acetylation	1/2242	4/32470	0.248892	0.710199	0.651299	Lus10021650.g	1
GO:0045216	BP	cell-cell junction organization	1/2242	4/32470	0.248892	0.710199	0.651299	Lus10019636.g	1
GO:0047746	MF	chlorophyllase activity	1/2242	4/32470	0.248892	0.710199	0.651299	Lus10039372.g	1
GO:0050236	MF	pyridoxine:NADP 4-dehydrogenase activity	1/2242	4/32470	0.248892	0.710199	0.651299	Lus10023701.g	1
GO:0050379	MF	UDP-glucuronate 5'-epimerase activity	1/2242	4/32470	0.248892	0.710199	0.651299	Lus10032391.g	1
GO:0050879	BP	multicellular organismal movement	1/2242	4/32470	0.248892	0.710199	0.651299	Lus10007459.g	1
GO:0052821	MF	DNA-7-methyladenine glycosylase activity	1/2242	4/32470	0.248892	0.710199	0.651299	Lus10041749.g	1
GO:0052822	MF	DNA-3-methylguanine glycosylase activity	1/2242	4/32470	0.248892	0.710199	0.651299	Lus10041749.g	1
GO:0060145	BP	viral gene silencing in virus induced gene silencing	1/2242	4/32470	0.248892	0.710199	0.651299	Lus10037136.g	1
GO:0071901	BP	negative regulation of protein serine/threonine kinase activity	1/2242	4/32470	0.248892	0.710199	0.651299	Lus10021940.g	1
GO:0072351	BP	tricarboxylic acid biosynthetic process	1/2242	4/32470	0.248892	0.710199	0.651299	Lus10029843.g	1
GO:1902751	BP	positive regulation of cell cycle G2/M phase transition	1/2242	4/32470	0.248892	0.710199	0.651299	Lus10014595.g	1
GO:0006368	BP	transcription elongation from RNA polymerase II promoter	4/2242	37/32470	0.250523	0.710199	0.651299	Lus10027295.g/Lus10001102.g/Lus10033586.g/Lus10017289.g	4
GO:0030054	CC	cell junction	35/2242	449/32470	0.251269	0.710199	0.651299	Lus10003660.g/Lus10001363.g/Lus10007633.g/Lus10015468.g/Lus10006746.g/Lus10022924.g/Lus10037469.g/Lus10029123.g/Lus10015032.g/Lus10043181.g/Lus10009819.g/scaffold225.31/Lus10020051.g/Lus10040925.g/Lus10027477.g/Lus10041679.g/Lus10021104.g/Lus10003611.g/Lus10042724.g/Lus10027436.g/Lus10029684.g/Lus10014310.g/Lus10010319.g/Lus10009169.g/Lus10040538.g/Lus10033382.g/Lus10023391.g/Lus10035283.g/Lus100…	35
GO:0000018	BP	regulation of DNA recombination	2/2242	14/32470	0.251367	0.710199	0.651299	Lus10021767.g/Lus10017724.g	2
GO:0000982	MF	DNA-binding transcription factor activity, RNA polymerase II-specific	2/2242	14/32470	0.251367	0.710199	0.651299	Lus10003119.g/Lus10041126.g	2
GO:0004448	MF	isocitrate dehydrogenase activity	2/2242	14/32470	0.251367	0.710199	0.651299	Lus10012111.g/Lus10013806.g	2
GO:0006621	BP	protein retention in ER lumen	2/2242	14/32470	0.251367	0.710199	0.651299	Lus10022763.g/Lus10003146.g	2
GO:0015807	BP	L-amino acid transport	2/2242	14/32470	0.251367	0.710199	0.651299	Lus10037544.g/Lus10018692.g	2
GO:0031306	CC	intrinsic component of mitochondrial outer membrane	2/2242	14/32470	0.251367	0.710199	0.651299	Lus10042575.g/Lus10022034.g	2
GO:0031307	CC	integral component of mitochondrial outer membrane	2/2242	14/32470	0.251367	0.710199	0.651299	Lus10042575.g/Lus10022034.g	2
GO:0035437	BP	maintenance of protein localization in endoplasmic reticulum	2/2242	14/32470	0.251367	0.710199	0.651299	Lus10022763.g/Lus10003146.g	2
GO:0046923	MF	ER retention sequence binding	2/2242	14/32470	0.251367	0.710199	0.651299	Lus10022763.g/Lus10003146.g	2
GO:0048513	BP	animal organ development	2/2242	14/32470	0.251367	0.710199	0.651299	Lus10007231.g/Lus10035801.g	2
GO:0008374	MF	O-acyltransferase activity	17/2242	206/32470	0.257438	0.726728	0.666457	Lus10000988.g/Lus10017165.g/Lus10002500.g/Lus10026853.g/Lus10024927.g/Lus10014075.g/Lus10021564.g/Lus10019840.g/scaffold15.23/Lus10039135.g/Lus10017672.g/Lus10031396.g/Lus10002556.g/Lus10042789.g/Lus10027375.g/Lus10013035.g/Lus10029126.g	17
GO:0010154	BP	fruit development	21/2242	260/32470	0.258877	0.730165	0.669609	Lus10030446.g/Lus10021369.g/Lus10041310.g/Lus10020719.g/Lus10017223.g/Lus10017049.g/Lus10029876.g/Lus10026617.g/Lus10022060.g/Lus10035662.g/Lus10004646.g/Lus10041348.g/Lus10004561.g/Lus10023694.g/Lus10037370.g/Lus10016273.g/Lus10027477.g/Lus10000672.g/Lus10032127.g/Lus10019636.g/Lus10037156.g	21
GO:0042278	BP	purine nucleoside metabolic process	7/2242	75/32470	0.25963	0.731664	0.670984	Lus10001862.g/Lus10040973.g/Lus10037672.g/Lus10022102.g/Lus10035083.g/Lus10015966.g/Lus10023021.g	7
GO:0019585	BP	glucuronate metabolic process	15/2242	180/32470	0.262074	0.736254	0.675193	Lus10024583.g/scaffold1247.34/Lus10028572.g/Lus10042262.g/scaffold274.9/Lus10039277.g/Lus10031819.g/Lus10014437.g/Lus10019833.g/Lus10042261.g/Lus10013500.g/Lus10019808.g/Lus10014105.g/Lus10023939.g/Lus10018878.g	15
GO:0052695	BP	cellular glucuronidation	15/2242	180/32470	0.262074	0.736254	0.675193	Lus10024583.g/scaffold1247.34/Lus10028572.g/Lus10042262.g/scaffold274.9/Lus10039277.g/Lus10031819.g/Lus10014437.g/Lus10019833.g/Lus10042261.g/Lus10013500.g/Lus10019808.g/Lus10014105.g/Lus10023939.g/Lus10018878.g	15
GO:0052696	BP	flavonoid glucuronidation	15/2242	180/32470	0.262074	0.736254	0.675193	Lus10024583.g/scaffold1247.34/Lus10028572.g/Lus10042262.g/scaffold274.9/Lus10039277.g/Lus10031819.g/Lus10014437.g/Lus10019833.g/Lus10042261.g/Lus10013500.g/Lus10019808.g/Lus10014105.g/Lus10023939.g/Lus10018878.g	15
GO:0006081	BP	cellular aldehyde metabolic process	10/2242	114/32470	0.262242	0.736254	0.675193	Lus10032078.g/Lus10013155.g/Lus10014614.g/Lus10015715.g/Lus10042724.g/Lus10029684.g/Lus10002356.g/Lus10032079.g/Lus10003149.g/Lus10026322.g	10
GO:0051274	BP	beta-glucan biosynthetic process	9/2242	101/32470	0.262374	0.736254	0.675193	Lus10032415.g/Lus10023057.g/Lus10020750.g/Lus10037469.g/Lus10034664.g/Lus10023056.g/Lus10007327.g/Lus10017868.g/Lus10039607.g	9
GO:0004526	MF	ribonuclease P activity	3/2242	26/32470	0.265955	0.741489	0.679994	Lus10000951.g/Lus10026483.g/Lus10021917.g	3
GO:0009825	BP	multidimensional cell growth	3/2242	26/32470	0.265955	0.741489	0.679994	Lus10030446.g/Lus10026617.g/Lus10037156.g	3
GO:0009846	BP	pollen germination	3/2242	26/32470	0.265955	0.741489	0.679994	Lus10040415.g/Lus10004646.g/Lus10022786.g	3
GO:0030983	MF	mismatched DNA binding	3/2242	26/32470	0.265955	0.741489	0.679994	Lus10034734.g/Lus10033274.g/Lus10017724.g	3
GO:0043067	BP	regulation of programmed cell death	3/2242	26/32470	0.265955	0.741489	0.679994	Lus10021940.g/Lus10010133.g/scaffold847.22	3
GO:0043174	BP	nucleoside salvage	3/2242	26/32470	0.265955	0.741489	0.679994	Lus10009040.g/Lus10009678.g/Lus10023021.g	3
GO:0009896	BP	positive regulation of catabolic process	4/2242	38/32470	0.266037	0.741489	0.679994	Lus10035332.g/Lus10024093.g/Lus10023619.g/Lus10026104.g	4
GO:0031331	BP	positive regulation of cellular catabolic process	4/2242	38/32470	0.266037	0.741489	0.679994	Lus10035332.g/Lus10024093.g/Lus10023619.g/Lus10026104.g	4
GO:0005267	MF	potassium channel activity	6/2242	63/32470	0.267525	0.745005	0.683218	Lus10005221.g/Lus10019442.g/Lus10031320.g/Lus10031891.g/Lus10037904.g/Lus10043298.g	6
GO:0002376	BP	immune system process	11/2242	128/32470	0.269749	0.750567	0.688319	Lus10035832.g/Lus10021940.g/Lus10034895.g/Lus10041348.g/Lus10014765.g/Lus10022265.g/Lus10023302.g/Lus10001137.g/Lus10037370.g/Lus10041679.g/Lus10037136.g	11
GO:0006066	BP	alcohol metabolic process	7/2242	76/32470	0.270453	0.751892	0.689534	Lus10000692.g/Lus10006198.g/Lus10035662.g/Lus10019671.g/Lus10016354.g/Lus10018235.g/Lus10040669.g	7
GO:0004715	MF	non-membrane spanning protein tyrosine kinase activity	9/2242	102/32470	0.271677	0.754658	0.692071	Lus10023473.g/Lus10040350.g/Lus10032357.g/Lus10025236.g/Lus10022466.g/Lus10024111.g/Lus10011930.g/scaffold272.246/Lus10026503.g	9
GO:0004177	MF	aminopeptidase activity	5/2242	51/32470	0.275139	0.758375	0.695479	Lus10011603.g/Lus10024034.g/Lus10000403.g/Lus10041817.g/Lus10001877.g	5
GO:0008378	MF	galactosyltransferase activity	5/2242	51/32470	0.275139	0.758375	0.695479	Lus10010897.g/Lus10012822.g/Lus10027185.g/Lus10031434.g/Lus10002079.g	5
GO:0044262	BP	cellular carbohydrate metabolic process	41/2242	538/32470	0.27737	0.758375	0.695479	Lus10004340.g/Lus10032415.g/Lus10010308.g/Lus10027725.g/Lus10012264.g/Lus10013417.g/Lus10023057.g/Lus10023553.g/Lus10030484.g/Lus10000692.g/Lus10037789.g/Lus10034595.g/Lus10001468.g/Lus10015715.g/Lus10006198.g/Lus10019671.g/Lus10037377.g/Lus10005559.g/Lus10028922.g/Lus10020506.g/Lus10011360.g/Lus10020750.g/Lus10007900.g/Lus10016012.g/Lus10037469.g/Lus10012990.g/Lus10021805.g/Lus10034664.g/Lus1001…	41
GO:0004069	MF	L-aspartate:2-oxoglutarate aminotransferase activity	2/2242	15/32470	0.277705	0.758375	0.695479	Lus10022137.g/Lus10011101.g	2
GO:0004467	MF	long-chain fatty acid-CoA ligase activity	2/2242	15/32470	0.277705	0.758375	0.695479	Lus10016083.g/Lus10042707.g	2
GO:0005791	CC	rough endoplasmic reticulum	2/2242	15/32470	0.277705	0.758375	0.695479	scaffold43.21/Lus10017891.g	2
GO:0015645	MF	fatty acid ligase activity	2/2242	15/32470	0.277705	0.758375	0.695479	Lus10016083.g/Lus10042707.g	2
GO:0030151	MF	molybdenum ion binding	2/2242	15/32470	0.277705	0.758375	0.695479	Lus10007754.g/Lus10018692.g	2
GO:0030286	CC	dynein complex	2/2242	15/32470	0.277705	0.758375	0.695479	Lus10038566.g/Lus10037551.g	2
GO:0030867	CC	rough endoplasmic reticulum membrane	2/2242	15/32470	0.277705	0.758375	0.695479	scaffold43.21/Lus10017891.g	2
GO:0009658	BP	chloroplast organization	11/2242	129/32470	0.278075	0.758375	0.695479	Lus10025846.g/Lus10038254.g/Lus10005106.g/Lus10016626.g/Lus10022531.g/Lus10038823.g/Lus10017614.g/Lus10014934.g/Lus10033572.g/Lus10031863.g/scaffold175.45	11
GO:0003697	MF	single-stranded DNA binding	6/2242	64/32470	0.279544	0.758375	0.695479	Lus10021767.g/Lus10034734.g/Lus10033274.g/Lus10021585.g/Lus10016644.g/Lus10023619.g	6
GO:0016671	MF	oxidoreductase activity, acting on a sulfur group of donors, disulfide as acceptor	6/2242	64/32470	0.279544	0.758375	0.695479	Lus10026878.g/Lus10003437.g/Lus10041922.g/Lus10009574.g/Lus10019847.g/Lus10036698.g	6
GO:0009926	BP	auxin polar transport	4/2242	39/32470	0.281719	0.758375	0.695479	Lus10008098.g/Lus10020193.g/Lus10026994.g/Lus10041508.g	4
GO:0019395	BP	fatty acid oxidation	4/2242	39/32470	0.281719	0.758375	0.695479	Lus10020908.g/Lus10024038.g/Lus10003176.g/Lus10012306.g	4
GO:0071900	BP	regulation of protein serine/threonine kinase activity	4/2242	39/32470	0.281719	0.758375	0.695479	Lus10021940.g/Lus10022265.g/Lus10001137.g/Lus10042873.g	4
GO:0006063	BP	uronic acid metabolic process	15/2242	183/32470	0.282924	0.758375	0.695479	Lus10024583.g/scaffold1247.34/Lus10028572.g/Lus10042262.g/scaffold274.9/Lus10039277.g/Lus10031819.g/Lus10014437.g/Lus10019833.g/Lus10042261.g/Lus10013500.g/Lus10019808.g/Lus10014105.g/Lus10023939.g/Lus10018878.g	15
GO:0016725	MF	oxidoreductase activity, acting on CH or CH2 groups	3/2242	27/32470	0.285174	0.758375	0.695479	Lus10034306.g/Lus10026322.g/Lus10018867.g	3
GO:0032592	CC	integral component of mitochondrial membrane	3/2242	27/32470	0.285174	0.758375	0.695479	Lus10016878.g/Lus10042575.g/Lus10022034.g	3
GO:0048573	BP	photoperiodism, flowering	3/2242	27/32470	0.285174	0.758375	0.695479	Lus10031826.g/Lus10035332.g/Lus10007459.g	3
GO:1902555	CC	endoribonuclease complex	3/2242	27/32470	0.285174	0.758375	0.695479	Lus10000951.g/Lus10026483.g/Lus10021917.g	3
GO:1905348	CC	endonuclease complex	3/2242	27/32470	0.285174	0.758375	0.695479	Lus10000951.g/Lus10026483.g/Lus10021917.g	3
GO:0043436	BP	oxoacid metabolic process	115/2242	1579/32470	0.285702	0.758375	0.695479	Lus10004697.g/Lus10014407.g/Lus10016083.g/Lus10017934.g/Lus10024583.g/Lus10040264.g/Lus10022137.g/Lus10014658.g/Lus10034963.g/Lus10039861.g/Lus10028135.g/Lus10039278.g/scaffold338.16/Lus10033661.g/Lus10001018.g/scaffold1247.34/Lus10002191.g/Lus10001016.g/Lus10008521.g/Lus10041003.g/C8303341.1/Lus10039994.g/Lus10004696.g/Lus10007247.g/Lus10028572.g/Lus10020908.g/Lus10006058.g/Lus10042839.g/Lus1004…	115
GO:0005509	MF	calcium ion binding	36/2242	471/32470	0.286684	0.758375	0.695479	Lus10005652.g/Lus10009127.g/Lus10005619.g/Lus10017527.g/scaffold9.86/Lus10040415.g/Lus10036667.g/Lus10033706.g/Lus10028755.g/Lus10031634.g/Lus10006737.g/Lus10008357.g/Lus10018594.g/Lus10042575.g/Lus10017251.g/Lus10011811.g/Lus10031049.g/Lus10018839.g/Lus10043181.g/Lus10022034.g/Lus10003611.g/Lus10011259.g/Lus10033108.g/Lus10041093.g/Lus10042185.g/Lus10020087.g/Lus10021827.g/Lus10002130.g/Lus10041…	36
GO:0044702	BP	reproductive process	51/2242	680/32470	0.288761	0.758375	0.695479	Lus10030446.g/scaffold272.125/Lus10027969.g/Lus10021369.g/Lus10041310.g/Lus10020719.g/Lus10005106.g/Lus10017223.g/Lus10017049.g/Lus10040415.g/Lus10002500.g/Lus10029876.g/Lus10026617.g/Lus10037032.g/Lus10022060.g/Lus10041143.g/Lus10035662.g/Lus10006746.g/Lus10004646.g/Lus10041348.g/Lus10022636.g/Lus10041794.g/Lus10000639.g/Lus10027404.g/Lus10004561.g/Lus10010242.g/Lus10023694.g/Lus10037370.g/Lus10…	51
GO:0015698	BP	inorganic anion transport	8/2242	91/32470	0.291905	0.758375	0.695479	Lus10000673.g/Lus10024614.g/Lus10032252.g/Lus10033886.g/Lus10003560.g/Lus10011826.g/scaffold115.10/scaffold610.41	8
GO:0051287	MF	NAD binding	12/2242	144/32470	0.292064	0.758375	0.695479	Lus10034963.g/C8303341.1/Lus10041393.g/Lus10012964.g/scaffold261.42/Lus10037552.g/Lus10032150.g/Lus10012111.g/Lus10013806.g/Lus10009602.g/Lus10037334.g/Lus10015455.g	12
GO:0006082	BP	organic acid metabolic process	115/2242	1583/32470	0.295414	0.758375	0.695479	Lus10004697.g/Lus10014407.g/Lus10016083.g/Lus10017934.g/Lus10024583.g/Lus10040264.g/Lus10022137.g/Lus10014658.g/Lus10034963.g/Lus10039861.g/Lus10028135.g/Lus10039278.g/scaffold338.16/Lus10033661.g/Lus10001018.g/scaffold1247.34/Lus10002191.g/Lus10001016.g/Lus10008521.g/Lus10041003.g/C8303341.1/Lus10039994.g/Lus10004696.g/Lus10007247.g/Lus10028572.g/Lus10020908.g/Lus10006058.g/Lus10042839.g/Lus1004…	115
GO:0050660	MF	flavin adenine dinucleotide binding	22/2242	280/32470	0.295501	0.758375	0.695479	Lus10003845.g/Lus10026471.g/Lus10020908.g/Lus10009009.g/Lus10024289.g/Lus10029955.g/Lus10011093.g/Lus10022903.g/scaffold380.27/scaffold176.57/Lus10034468.g/Lus10018654.g/Lus10034306.g/Lus10023366.g/Lus10024038.g/Lus10038440.g/Lus10003176.g/Lus10018038.g/Lus10043103.g/Lus10038620.g/Lus10011000.g/Lus10011800.g	22
GO:0004520	MF	endodeoxyribonuclease activity	4/2242	40/32470	0.297536	0.758375	0.695479	Lus10021585.g/Lus10016644.g/Lus10025575.g/Lus10004462.g	4
GO:0034440	BP	lipid oxidation	4/2242	40/32470	0.297536	0.758375	0.695479	Lus10020908.g/Lus10024038.g/Lus10003176.g/Lus10012306.g	4
GO:0034062	MF	5'-3' RNA polymerase activity	10/2242	118/32470	0.297672	0.758375	0.695479	Lus10000362.g/Lus10038823.g/Lus10006088.g/Lus10012965.g/Lus10013128.g/Lus10041724.g/Lus10012787.g/Lus10002955.g/Lus10040717.g/Lus10023619.g	10
GO:0097747	MF	RNA polymerase activity	10/2242	118/32470	0.297672	0.758375	0.695479	Lus10000362.g/Lus10038823.g/Lus10006088.g/Lus10012965.g/Lus10013128.g/Lus10041724.g/Lus10012787.g/Lus10002955.g/Lus10040717.g/Lus10023619.g	10
GO:0044707	BP	multicellular organismal process	83/2242	1132/32470	0.298341	0.758375	0.695479	Lus10000310.g/Lus10015754.g/Lus10042731.g/Lus10030446.g/Lus10016056.g/scaffold272.125/Lus10027969.g/Lus10011335.g/Lus10021369.g/Lus10041310.g/Lus10020719.g/Lus10005106.g/Lus10041618.g/Lus10008098.g/Lus10017223.g/Lus10000659.g/Lus10006369.g/Lus10028001.g/Lus10017049.g/Lus10002900.g/Lus10040415.g/Lus10035472.g/Lus10022225.g/Lus10002500.g/Lus10031826.g/Lus10007231.g/Lus10029876.g/Lus10026617.g/Lus10…	83
GO:0003899	MF	DNA-directed 5'-3' RNA polymerase activity	9/2242	105/32470	0.30013	0.758375	0.695479	Lus10000362.g/Lus10038823.g/Lus10006088.g/Lus10013128.g/Lus10041724.g/Lus10012787.g/Lus10002955.g/Lus10040717.g/Lus10023619.g	9
GO:0004709	MF	MAP kinase kinase kinase activity	9/2242	105/32470	0.30013	0.758375	0.695479	Lus10030229.g/Lus10024192.g/Lus10005983.g/Lus10042632.g/Lus10016620.g/Lus10024474.g/Lus10009983.g/Lus10009631.g/Lus10013384.g	9
GO:0016811	MF	hydrolase activity, acting on carbon-nitrogen (but not peptide) bonds, in linear amides	9/2242	105/32470	0.30013	0.758375	0.695479	Lus10011528.g/Lus10036993.g/Lus10015388.g/Lus10042001.g/Lus10019822.g/Lus10014091.g/Lus10024795.g/Lus10014092.g/Lus10007544.g	9
GO:0000038	BP	very long-chain fatty acid metabolic process	1/2242	5/32470	0.300761	0.758375	0.695479	Lus10028171.g	1
GO:0000124	CC	SAGA complex	1/2242	5/32470	0.300761	0.758375	0.695479	Lus10013170.g	1
GO:0000289	BP	nuclear-transcribed mRNA poly(A) tail shortening	1/2242	5/32470	0.300761	0.758375	0.695479	Lus10023619.g	1
GO:0000722	BP	telomere maintenance via recombination	1/2242	5/32470	0.300761	0.758375	0.695479	Lus10016644.g	1
GO:0000778	CC	condensed nuclear chromosome kinetochore	1/2242	5/32470	0.300761	0.758375	0.695479	Lus10025814.g	1
GO:0003896	MF	DNA primase activity	1/2242	5/32470	0.300761	0.758375	0.695479	Lus10006088.g	1
GO:0005262	MF	calcium channel activity	1/2242	5/32470	0.300761	0.758375	0.695479	Lus10018594.g	1
GO:0005459	MF	UDP-galactose transmembrane transporter activity	1/2242	5/32470	0.300761	0.758375	0.695479	Lus10029605.g	1
GO:0005483	MF	soluble NSF attachment protein activity	1/2242	5/32470	0.300761	0.758375	0.695479	Lus10012211.g	1
GO:0006545	BP	glycine biosynthetic process	1/2242	5/32470	0.300761	0.758375	0.695479	Lus10014658.g	1
GO:0006646	BP	phosphatidylethanolamine biosynthetic process	1/2242	5/32470	0.300761	0.758375	0.695479	Lus10035633.g	1
GO:0007155	BP	cell adhesion	1/2242	5/32470	0.300761	0.758375	0.695479	Lus10021125.g	1
GO:0008022	MF	protein C-terminus binding	1/2242	5/32470	0.300761	0.758375	0.695479	Lus10017289.g	1
GO:0009143	BP	nucleoside triphosphate catabolic process	1/2242	5/32470	0.300761	0.758375	0.695479	Lus10029160.g	1
GO:0009166	BP	nucleotide catabolic process	1/2242	5/32470	0.300761	0.758375	0.695479	Lus10029160.g	1
GO:0009204	BP	deoxyribonucleoside triphosphate catabolic process	1/2242	5/32470	0.300761	0.758375	0.695479	Lus10029160.g	1
GO:0009264	BP	deoxyribonucleotide catabolic process	1/2242	5/32470	0.300761	0.758375	0.695479	Lus10029160.g	1
GO:0009641	BP	shade avoidance	1/2242	5/32470	0.300761	0.758375	0.695479	Lus10035332.g	1
GO:0009851	BP	auxin biosynthetic process	1/2242	5/32470	0.300761	0.758375	0.695479	Lus10011093.g	1
GO:0009916	MF	alternative oxidase activity	1/2242	5/32470	0.300761	0.758375	0.695479	Lus10035670.g	1
GO:0010013	MF	N-1-naphthylphthalamic acid binding	1/2242	5/32470	0.300761	0.758375	0.695479	Lus10024034.g	1
GO:0010014	BP	meristem initiation	1/2242	5/32470	0.300761	0.758375	0.695479	Lus10029876.g	1
GO:0010163	BP	potassium ion transmembrane transport	1/2242	5/32470	0.300761	0.758375	0.695479	Lus10037904.g	1
GO:0010970	BP	transport along microtubule	1/2242	5/32470	0.300761	0.758375	0.695479	Lus10017359.g	1
GO:0015181	MF	arginine transmembrane transporter activity	1/2242	5/32470	0.300761	0.758375	0.695479	Lus10037544.g	1
GO:0015785	BP	UDP-galactose transmembrane transport	1/2242	5/32470	0.300761	0.758375	0.695479	Lus10029605.g	1
GO:0015846	BP	polyamine transport	1/2242	5/32470	0.300761	0.758375	0.695479	Lus10039180.g	1
GO:0016540	BP	protein autoprocessing	1/2242	5/32470	0.300761	0.758375	0.695479	Lus10035633.g	1
GO:0016803	MF	ether hydrolase activity	1/2242	5/32470	0.300761	0.758375	0.695479	Lus10040988.g	1
GO:0016862	MF	intramolecular oxidoreductase activity, interconverting keto- and enol-groups	1/2242	5/32470	0.300761	0.758375	0.695479	Lus10015966.g	1
GO:0018315	BP	molybdenum incorporation into molybdenum-molybdopterin complex	1/2242	5/32470	0.300761	0.758375	0.695479	Lus10041075.g	1
GO:0022610	BP	biological adhesion	1/2242	5/32470	0.300761	0.758375	0.695479	Lus10021125.g	1
GO:0030870	CC	Mre11 complex	1/2242	5/32470	0.300761	0.758375	0.695479	Lus10016644.g	1
GO:0030942	MF	endoplasmic reticulum signal peptide binding	1/2242	5/32470	0.300761	0.758375	0.695479	Lus10040614.g	1
GO:0030990	CC	intraciliary transport particle	1/2242	5/32470	0.300761	0.758375	0.695479	Lus10017359.g	1
GO:0030991	CC	intraciliary transport particle A	1/2242	5/32470	0.300761	0.758375	0.695479	Lus10017359.g	1
GO:0032135	MF	DNA insertion or deletion binding	1/2242	5/32470	0.300761	0.758375	0.695479	Lus10017724.g	1
GO:0032137	MF	guanine/thymine mispair binding	1/2242	5/32470	0.300761	0.758375	0.695479	Lus10017724.g	1
GO:0032301	CC	MutSalpha complex	1/2242	5/32470	0.300761	0.758375	0.695479	Lus10017724.g	1
GO:0035721	BP	intraciliary retrograde transport	1/2242	5/32470	0.300761	0.758375	0.695479	Lus10017359.g	1
GO:0042040	BP	metal incorporation into metallo-molybdopterin complex	1/2242	5/32470	0.300761	0.758375	0.695479	Lus10041075.g	1
GO:0042073	BP	intraciliary transport	1/2242	5/32470	0.300761	0.758375	0.695479	Lus10017359.g	1
GO:0042447	BP	hormone catabolic process	1/2242	5/32470	0.300761	0.758375	0.695479	Lus10018038.g	1
GO:0042761	BP	very long-chain fatty acid biosynthetic process	1/2242	5/32470	0.300761	0.758375	0.695479	Lus10028171.g	1
GO:0043068	BP	positive regulation of programmed cell death	1/2242	5/32470	0.300761	0.758375	0.695479	Lus10010133.g	1
GO:0043570	BP	maintenance of DNA repeat elements	1/2242	5/32470	0.300761	0.758375	0.695479	Lus10017724.g	1
GO:0043715	MF	2,3-diketo-5-methylthiopentyl-1-phosphate enolase activity	1/2242	5/32470	0.300761	0.758375	0.695479	Lus10015966.g	1
GO:0043716	MF	2-hydroxy-3-keto-5-methylthiopentenyl-1-phosphate phosphatase activity	1/2242	5/32470	0.300761	0.758375	0.695479	Lus10015966.g	1
GO:0043874	MF	acireductone synthase activity	1/2242	5/32470	0.300761	0.758375	0.695479	Lus10015966.g	1
GO:0044782	BP	cilium organization	1/2242	5/32470	0.300761	0.758375	0.695479	Lus10017359.g	1
GO:0045439	MF	isopenicillin-N epimerase activity	1/2242	5/32470	0.300761	0.758375	0.695479	Lus10001514.g	1
GO:0046133	BP	pyrimidine ribonucleoside catabolic process	1/2242	5/32470	0.300761	0.758375	0.695479	scaffold251.59	1
GO:0046135	BP	pyrimidine nucleoside catabolic process	1/2242	5/32470	0.300761	0.758375	0.695479	scaffold251.59	1
GO:0046337	BP	phosphatidylethanolamine metabolic process	1/2242	5/32470	0.300761	0.758375	0.695479	Lus10035633.g	1
GO:0046570	MF	methylthioribulose 1-phosphate dehydratase activity	1/2242	5/32470	0.300761	0.758375	0.695479	Lus10015966.g	1
GO:0046964	MF	3'-phosphoadenosine 5'-phosphosulfate transmembrane transporter activity	1/2242	5/32470	0.300761	0.758375	0.695479	Lus10029605.g	1
GO:0047568	MF	3-oxo-5-beta-steroid 4-dehydrogenase activity	1/2242	5/32470	0.300761	0.758375	0.695479	Lus10032854.g	1
GO:0051185	MF	coenzyme transmembrane transporter activity	1/2242	5/32470	0.300761	0.758375	0.695479	Lus10008572.g	1
GO:0051781	BP	positive regulation of cell division	1/2242	5/32470	0.300761	0.758375	0.695479	Lus10023694.g	1
GO:0060211	BP	regulation of nuclear-transcribed mRNA poly(A) tail shortening	1/2242	5/32470	0.300761	0.758375	0.695479	Lus10023619.g	1
GO:0060213	BP	positive regulation of nuclear-transcribed mRNA poly(A) tail shortening	1/2242	5/32470	0.300761	0.758375	0.695479	Lus10023619.g	1
GO:0060271	BP	cilium assembly	1/2242	5/32470	0.300761	0.758375	0.695479	Lus10017359.g	1
GO:0060964	BP	regulation of gene silencing by miRNA	1/2242	5/32470	0.300761	0.758375	0.695479	Lus10001012.g	1
GO:0070417	BP	cellular response to cold	1/2242	5/32470	0.300761	0.758375	0.695479	Lus10037032.g	1
GO:0071484	BP	cellular response to light intensity	1/2242	5/32470	0.300761	0.758375	0.695479	Lus10011777.g	1
GO:0072334	BP	UDP-galactose transmembrane transport	1/2242	5/32470	0.300761	0.758375	0.695479	Lus10029605.g	1
GO:0072530	BP	purine-containing compound transmembrane transport	1/2242	5/32470	0.300761	0.758375	0.695479	Lus10008572.g	1
GO:0098840	BP	protein transport along microtubule	1/2242	5/32470	0.300761	0.758375	0.695479	Lus10017359.g	1
GO:0099111	BP	microtubule-based transport	1/2242	5/32470	0.300761	0.758375	0.695479	Lus10017359.g	1
GO:0099118	BP	microtubule-based protein transport	1/2242	5/32470	0.300761	0.758375	0.695479	Lus10017359.g	1
GO:1900151	BP	regulation of nuclear-transcribed mRNA catabolic process, deadenylation-dependent decay	1/2242	5/32470	0.300761	0.758375	0.695479	Lus10023619.g	1
GO:1900153	BP	positive regulation of nuclear-transcribed mRNA catabolic process, deadenylation-dependent decay	1/2242	5/32470	0.300761	0.758375	0.695479	Lus10023619.g	1
GO:2000652	BP	regulation of secondary cell wall biogenesis	1/2242	5/32470	0.300761	0.758375	0.695479	Lus10024485.g	1
GO:0048507	BP	meristem development	8/2242	92/32470	0.302179	0.758375	0.695479	Lus10008098.g/Lus10017223.g/Lus10029876.g/Lus10004646.g/Lus10000639.g/Lus10018038.g/Lus10010633.g/Lus10000285.g	8
GO:0006760	BP	folic acid-containing compound metabolic process	5/2242	53/32470	0.302445	0.758375	0.695479	Lus10026933.g/Lus10004694.g/Lus10020132.g/Lus10040261.g/Lus10042923.g	5
GO:0006818	BP	proton transmembrane transport	11/2242	132/32470	0.303494	0.758375	0.695479	Lus10010618.g/Lus10026946.g/Lus10026944.g/Lus10010623.g/Lus10033179.g/Lus10033934.g/Lus10010619.g/Lus10008828.g/Lus10042445.g/Lus10003259.g/Lus10033382.g	11
GO:0015992	BP	proton transmembrane transport	11/2242	132/32470	0.303494	0.758375	0.695479	Lus10010618.g/Lus10026946.g/Lus10026944.g/Lus10010623.g/Lus10033179.g/Lus10033934.g/Lus10010619.g/Lus10008828.g/Lus10042445.g/Lus10003259.g/Lus10033382.g	11
GO:0044798	CC	nuclear transcription factor complex	7/2242	79/32470	0.303581	0.758375	0.695479	Lus10011326.g/Lus10012202.g/Lus10038448.g/Lus10023358.g/Lus10007763.g/Lus10005100.g/Lus10030137.g	7
GO:0003993	MF	acid phosphatase activity	6/2242	66/32470	0.303925	0.758375	0.695479	Lus10019625.g/Lus10037080.g/Lus10024179.g/Lus10022786.g/Lus10011847.g/Lus10035100.g	6
GO:0004364	MF	glutathione transferase activity	6/2242	66/32470	0.303925	0.758375	0.695479	Lus10026643.g/Lus10030414.g/Lus10015049.g/Lus10029815.g/Lus10007897.g/Lus10042756.g	6
GO:0007127	BP	meiosis I	6/2242	66/32470	0.303925	0.758375	0.695479	Lus10041143.g/Lus10010242.g/Lus10016644.g/Lus10036517.g/Lus10017724.g/Lus10039383.g	6
GO:0003872	MF	6-phosphofructokinase activity	2/2242	16/32470	0.303976	0.758375	0.695479	Lus10039994.g/Lus10008812.g	2
GO:0004356	MF	glutamate-ammonia ligase activity	2/2242	16/32470	0.303976	0.758375	0.695479	Lus10014407.g/Lus10012536.g	2
GO:0006448	BP	regulation of translational elongation	2/2242	16/32470	0.303976	0.758375	0.695479	Lus10030422.g/Lus10026637.g	2
GO:0006542	BP	glutamine biosynthetic process	2/2242	16/32470	0.303976	0.758375	0.695479	Lus10014407.g/Lus10012536.g	2
GO:0009065	BP	glutamine family amino acid catabolic process	2/2242	16/32470	0.303976	0.758375	0.695479	Lus10034095.g/Lus10034094.g	2
GO:0009262	BP	deoxyribonucleotide metabolic process	2/2242	16/32470	0.303976	0.758375	0.695479	Lus10029160.g/Lus10018867.g	2
GO:0016211	MF	ammonia ligase activity	2/2242	16/32470	0.303976	0.758375	0.695479	Lus10014407.g/Lus10012536.g	2
GO:0016880	MF	acid-ammonia (or amide) ligase activity	2/2242	16/32470	0.303976	0.758375	0.695479	Lus10014407.g/Lus10012536.g	2
GO:0019509	BP	L-methionine salvage from methylthioadenosine	2/2242	16/32470	0.303976	0.758375	0.695479	Lus10021902.g/Lus10015966.g	2
GO:0040034	BP	regulation of development, heterochronic	2/2242	16/32470	0.303976	0.758375	0.695479	Lus10037136.g/Lus10010633.g	2
GO:0043102	BP	amino acid salvage	2/2242	16/32470	0.303976	0.758375	0.695479	Lus10021902.g/Lus10015966.g	2
GO:0071267	BP	L-methionine salvage	2/2242	16/32470	0.303976	0.758375	0.695479	Lus10021902.g/Lus10015966.g	2
GO:0072595	BP	maintenance of protein localization in organelle	2/2242	16/32470	0.303976	0.758375	0.695479	Lus10022763.g/Lus10003146.g	2
GO:0006613	BP	cotranslational protein targeting to membrane	3/2242	28/32470	0.304499	0.758375	0.695479	scaffold43.21/Lus10017891.g/Lus10040614.g	3
GO:0006614	BP	SRP-dependent cotranslational protein targeting to membrane	3/2242	28/32470	0.304499	0.758375	0.695479	scaffold43.21/Lus10017891.g/Lus10040614.g	3
GO:0016229	MF	steroid dehydrogenase activity	3/2242	28/32470	0.304499	0.758375	0.695479	Lus10032854.g/Lus10008775.g/Lus10008774.g	3
GO:0016668	MF	oxidoreductase activity, acting on a sulfur group of donors, NAD(P) as acceptor	3/2242	28/32470	0.304499	0.758375	0.695479	Lus10025845.g/Lus10043103.g/Lus10024212.g	3
GO:0046653	BP	tetrahydrofolate metabolic process	3/2242	28/32470	0.304499	0.758375	0.695479	Lus10026933.g/Lus10020132.g/Lus10042923.g	3
GO:0098573	CC	intrinsic component of mitochondrial membrane	3/2242	28/32470	0.304499	0.758375	0.695479	Lus10016878.g/Lus10042575.g/Lus10022034.g	3
GO:0042787	BP	ubiquitin-dependent protein catabolic process	9/2242	106/32470	0.309773	0.770928	0.706991	Lus10003792.g/Lus10019908.g/Lus10024093.g/Lus10013235.g/Lus10036739.g/Lus10000513.g/Lus10030755.g/Lus10003698.g/Lus10026104.g	9
GO:0003779	MF	actin binding	11/2242	133/32470	0.312099	0.776132	0.711764	Lus10038576.g/Lus10014687.g/Lus10006896.g/Lus10040415.g/Lus10005933.g/Lus10025049.g/Lus10034448.g/Lus10042627.g/Lus10006846.g/Lus10029012.g/Lus10004374.g	11
GO:0006098	BP	pentose-phosphate shunt	4/2242	41/32470	0.313455	0.778916	0.714317	Lus10032078.g/Lus10014614.g/Lus10015715.g/Lus10032079.g	4
GO:0000981	MF	DNA-binding transcription factor activity, RNA polymerase II-specific	7/2242	80/32470	0.314806	0.781685	0.716856	Lus10031826.g/Lus10003119.g/Lus10028005.g/Lus10023926.g/Lus10041126.g/scaffold31.181/Lus10025599.g	7
GO:2000113	BP	negative regulation of cellular macromolecule biosynthetic process	14/2242	174/32470	0.315839	0.782933	0.718	Lus10005134.g/scaffold370.2/Lus10012202.g/Lus10008007.g/Lus10019348.g/Lus10007849.g/Lus10009351.g/Lus10004759.g/Lus10001012.g/Lus10043200.g/Lus10024485.g/Lus10021650.g/Lus10041718.g/Lus10043433.g	14
GO:0009965	BP	leaf morphogenesis	5/2242	54/32470	0.316253	0.782933	0.718	scaffold272.125/Lus10022225.g/Lus10022636.g/Lus10041794.g/Lus10023694.g	5
GO:0000724	BP	double-strand break repair via homologous recombination	6/2242	67/32470	0.316257	0.782933	0.718	Lus10034749.g/Lus10027219.g/Lus10037630.g/Lus10021585.g/Lus10004462.g/Lus10029476.g	6
GO:0000725	BP	recombinational repair	6/2242	67/32470	0.316257	0.782933	0.718	Lus10034749.g/Lus10027219.g/Lus10037630.g/Lus10021585.g/Lus10004462.g/Lus10029476.g	6
GO:0003712	MF	transcription coregulator activity	11/2242	134/32470	0.320762	0.792278	0.726571	Lus10010733.g/scaffold732.45/Lus10011929.g/Lus10036678.g/Lus10039911.g/Lus10027639.g/Lus10013170.g/Lus10008129.g/Lus10021650.g/Lus10013166.g/Lus10027648.g	11
GO:0022836	MF	gated channel activity	11/2242	134/32470	0.320762	0.792278	0.726571	Lus10038148.g/Lus10005221.g/Lus10018594.g/Lus10019442.g/Lus10004153.g/Lus10024477.g/Lus10031320.g/Lus10031891.g/Lus10037904.g/Lus10000913.g/Lus10043298.g	11
GO:0000148	CC	1,3-beta-D-glucan synthase complex	3/2242	29/32470	0.323874	0.792278	0.726571	Lus10020750.g/Lus10037469.g/Lus10007327.g	3
GO:0003843	MF	1,3-beta-D-glucan synthase activity	3/2242	29/32470	0.323874	0.792278	0.726571	Lus10020750.g/Lus10037469.g/Lus10007327.g	3
GO:0004549	MF	tRNA-specific ribonuclease activity	3/2242	29/32470	0.323874	0.792278	0.726571	Lus10000951.g/Lus10026483.g/Lus10021917.g	3
GO:0005375	MF	copper ion transmembrane transporter activity	3/2242	29/32470	0.323874	0.792278	0.726571	Lus10009789.g/Lus10009819.g/Lus10040925.g	3
GO:0005992	BP	trehalose biosynthetic process	3/2242	29/32470	0.323874	0.792278	0.726571	Lus10005559.g/Lus10012990.g/Lus10021805.g	3
GO:0006075	BP	(1->3)-beta-D-glucan biosynthetic process	3/2242	29/32470	0.323874	0.792278	0.726571	Lus10020750.g/Lus10037469.g/Lus10007327.g	3
GO:0009740	BP	gibberellic acid mediated signaling pathway	3/2242	29/32470	0.323874	0.792278	0.726571	Lus10027969.g/Lus10002900.g/Lus10002028.g	3
GO:0009967	BP	positive regulation of signal transduction	3/2242	29/32470	0.323874	0.792278	0.726571	Lus10027969.g/Lus10022265.g/Lus10001137.g	3
GO:0010476	BP	gibberellin mediated signaling pathway	3/2242	29/32470	0.323874	0.792278	0.726571	Lus10027969.g/Lus10002900.g/Lus10002028.g	3
GO:0016246	BP	RNA interference	3/2242	29/32470	0.323874	0.792278	0.726571	Lus10037136.g/Lus10019588.g/Lus10027113.g	3
GO:0023056	BP	positive regulation of signaling	3/2242	29/32470	0.323874	0.792278	0.726571	Lus10027969.g/Lus10022265.g/Lus10001137.g	3
GO:0030422	BP	production of siRNA involved in RNA interference	3/2242	29/32470	0.323874	0.792278	0.726571	Lus10037136.g/Lus10019588.g/Lus10027113.g	3
GO:0071370	BP	cellular response to gibberellin stimulus	3/2242	29/32470	0.323874	0.792278	0.726571	Lus10027969.g/Lus10002900.g/Lus10002028.g	3
GO:0090630	BP	activation of GTPase activity	3/2242	29/32470	0.323874	0.792278	0.726571	Lus10038582.g/Lus10037882.g/Lus10040349.g	3
GO:0016616	MF	oxidoreductase activity, acting on the CH-OH group of donors, NAD or NADP as acceptor	24/2242	313/32470	0.326832	0.798922	0.732663	Lus10032078.g/Lus10014614.g/Lus10029759.g/Lus10034963.g/Lus10007490.g/Lus10010803.g/C8303341.1/Lus10042787.g/Lus10023701.g/Lus10006502.g/Lus10016311.g/Lus10041393.g/Lus10012964.g/scaffold261.42/Lus10037552.g/Lus10032079.g/Lus10032150.g/Lus10016354.g/Lus10012111.g/Lus10013806.g/Lus10008775.g/Lus10008774.g/Lus10037334.g/Lus10015455.g	24
GO:0000217	MF	DNA secondary structure binding	2/2242	17/32470	0.330065	0.804614	0.737883	Lus10021585.g/Lus10017724.g	2
GO:0000400	MF	four-way junction DNA binding	2/2242	17/32470	0.330065	0.804614	0.737883	Lus10021585.g/Lus10017724.g	2
GO:0009504	CC	cell plate	2/2242	17/32470	0.330065	0.804614	0.737883	Lus10040213.g/Lus10037469.g	2
GO:0031401	BP	positive regulation of protein modification process	5/2242	55/32470	0.330135	0.804614	0.737883	Lus10010733.g/Lus10036678.g/Lus10022265.g/Lus10001137.g/Lus10007022.g	5
GO:0044427	CC	chromosomal part	25/2242	328/32470	0.333233	0.811172	0.743898	Lus10025968.g/Lus10005783.g/Lus10034734.g/Lus10041143.g/Lus10006088.g/Lus10006818.g/Lus10010844.g/Lus10010242.g/Lus10025814.g/Lus10014267.g/Lus10023694.g/Lus10027219.g/Lus10033274.g/Lus10011470.g/Lus10023105.g/Lus10016644.g/Lus10018907.g/Lus10011320.g/Lus10036517.g/Lus10023406.g/Lus10029476.g/Lus10021650.g/Lus10025203.g/Lus10012092.g/Lus10015868.g	25
GO:0007264	BP	small GTPase mediated signal transduction	15/2242	191/32470	0.340834	0.811172	0.743898	Lus10040044.g/scaffold244.27/Lus10005990.g/Lus10030221.g/Lus10019615.g/Lus10037940.g/Lus10042575.g/scaffold86.218/Lus10041702.g/Lus10040423.g/Lus10022034.g/Lus10023430.g/Lus10031559.g/Lus10019502.g/Lus10016066.g	15
GO:0009909	BP	regulation of flower development	6/2242	69/32470	0.341132	0.811172	0.743898	Lus10005106.g/Lus10017223.g/Lus10037032.g/Lus10027404.g/Lus10007459.g/Lus10043200.g	6
GO:0031201	CC	SNARE complex	6/2242	69/32470	0.341132	0.811172	0.743898	Lus10012211.g/Lus10040213.g/Lus10018296.g/Lus10017686.g/Lus10000311.g/Lus10011737.g	6
GO:0006829	BP	zinc ion transport	3/2242	30/32470	0.343247	0.811172	0.743898	Lus10002674.g/Lus10024107.g/Lus10031872.g	3
GO:0032436	BP	positive regulation of proteasomal ubiquitin-dependent protein catabolic process	3/2242	30/32470	0.343247	0.811172	0.743898	Lus10035332.g/Lus10024093.g/Lus10026104.g	3
GO:0045732	BP	positive regulation of protein catabolic process	3/2242	30/32470	0.343247	0.811172	0.743898	Lus10035332.g/Lus10024093.g/Lus10026104.g	3
GO:0045862	BP	positive regulation of proteolysis	3/2242	30/32470	0.343247	0.811172	0.743898	Lus10035332.g/Lus10024093.g/Lus10026104.g	3
GO:1901800	BP	positive regulation of proteasomal protein catabolic process	3/2242	30/32470	0.343247	0.811172	0.743898	Lus10035332.g/Lus10024093.g/Lus10026104.g	3
GO:1903052	BP	positive regulation of proteolysis involved in cellular protein catabolic process	3/2242	30/32470	0.343247	0.811172	0.743898	Lus10035332.g/Lus10024093.g/Lus10026104.g	3
GO:1903364	BP	positive regulation of cellular protein catabolic process	3/2242	30/32470	0.343247	0.811172	0.743898	Lus10035332.g/Lus10024093.g/Lus10026104.g	3
GO:0000209	BP	protein polyubiquitination	8/2242	96/32470	0.343978	0.811172	0.743898	Lus10024093.g/Lus10013235.g/Lus10000513.g/Lus10030755.g/Lus10038982.g/Lus10003698.g/Lus10026104.g/Lus10027282.g	8
GO:0000097	BP	sulfur amino acid biosynthetic process	5/2242	56/32470	0.344074	0.811172	0.743898	Lus10014765.g/Lus10021902.g/Lus10015947.g/Lus10015966.g/Lus10004118.g	5
GO:0044769	MF	ATPase activity, coupled to transmembrane movement of ions, rotational mechanism	5/2242	56/32470	0.344074	0.811172	0.743898	Lus10010623.g/Lus10033179.g/Lus10033934.g/Lus10010619.g/Lus10033382.g	5
GO:0000014	MF	single-stranded DNA endodeoxyribonuclease activity	1/2242	6/32470	0.34905	0.811172	0.743898	Lus10016644.g	1
GO:0000390	BP	spliceosomal complex disassembly	1/2242	6/32470	0.34905	0.811172	0.743898	Lus10002251.g	1
GO:0000812	CC	Swr1 complex	1/2242	6/32470	0.34905	0.811172	0.743898	Lus10021650.g	1
GO:0000912	BP	assembly of actomyosin apparatus involved in cytokinesis	1/2242	6/32470	0.34905	0.811172	0.743898	scaffold161.1	1
GO:0000914	BP	phragmoplast assembly	1/2242	6/32470	0.34905	0.811172	0.743898	scaffold161.1	1
GO:0001676	BP	long-chain fatty acid metabolic process	1/2242	6/32470	0.34905	0.811172	0.743898	Lus10016083.g	1
GO:0003999	MF	adenine phosphoribosyltransferase activity	1/2242	6/32470	0.34905	0.811172	0.743898	Lus10001497.g	1
GO:0004067	MF	asparaginase activity	1/2242	6/32470	0.34905	0.811172	0.743898	Lus10024795.g	1
GO:0004148	MF	dihydrolipoyl dehydrogenase activity	1/2242	6/32470	0.34905	0.811172	0.743898	Lus10043103.g	1
GO:0004181	MF	metallocarboxypeptidase activity	1/2242	6/32470	0.34905	0.811172	0.743898	Lus10017223.g	1
GO:0004360	MF	glutamine-fructose-6-phosphate transaminase (isomerizing) activity	1/2242	6/32470	0.34905	0.811172	0.743898	scaffold34.66	1
GO:0004450	MF	isocitrate dehydrogenase (NADP+) activity	1/2242	6/32470	0.34905	0.811172	0.743898	Lus10012111.g	1
GO:0004609	MF	phosphatidylserine decarboxylase activity	1/2242	6/32470	0.34905	0.811172	0.743898	Lus10035633.g	1
GO:0004614	MF	phosphoglucomutase activity	1/2242	6/32470	0.34905	0.811172	0.743898	Lus10034595.g	1
GO:0004748	MF	ribonucleoside-diphosphate reductase activity, thioredoxin disulfide as acceptor	1/2242	6/32470	0.34905	0.811172	0.743898	Lus10018867.g	1
GO:0004750	MF	ribulose-phosphate 3-epimerase activity	1/2242	6/32470	0.34905	0.811172	0.743898	Lus10015715.g	1
GO:0004854	MF	xanthine dehydrogenase activity	1/2242	6/32470	0.34905	0.811172	0.743898	Lus10034306.g	1
GO:0006168	BP	adenine salvage	1/2242	6/32470	0.34905	0.811172	0.743898	Lus10001497.g	1
GO:0008285	BP	negative regulation of cell proliferation	1/2242	6/32470	0.34905	0.811172	0.743898	Lus10043200.g	1
GO:0009590	BP	detection of gravity	1/2242	6/32470	0.34905	0.811172	0.743898	Lus10034595.g	1
GO:0009683	BP	indoleacetic acid metabolic process	1/2242	6/32470	0.34905	0.811172	0.743898	Lus10034253.g	1
GO:0009934	BP	regulation of meristem structural organization	1/2242	6/32470	0.34905	0.811172	0.743898	Lus10008098.g	1
GO:0009942	BP	longitudinal axis specification	1/2242	6/32470	0.34905	0.811172	0.743898	Lus10004646.g	1
GO:0010091	BP	trichome branching	1/2242	6/32470	0.34905	0.811172	0.743898	Lus10023694.g	1
GO:0010168	CC	ER body	1/2242	6/32470	0.34905	0.811172	0.743898	Lus10035730.g	1
GO:0016531	MF	copper chaperone activity	1/2242	6/32470	0.34905	0.811172	0.743898	Lus10037356.g	1
GO:0016728	MF	oxidoreductase activity, acting on CH or CH2 groups, disulfide as acceptor	1/2242	6/32470	0.34905	0.811172	0.743898	Lus10018867.g	1
GO:0019323	BP	pentose catabolic process	1/2242	6/32470	0.34905	0.811172	0.743898	Lus10015715.g	1
GO:0019388	BP	galactose catabolic process	1/2242	6/32470	0.34905	0.811172	0.743898	Lus10034595.g	1
GO:0033549	MF	MAP kinase phosphatase activity	1/2242	6/32470	0.34905	0.811172	0.743898	Lus10021940.g	1
GO:0033743	MF	peptide-methionine (R)-S-oxide reductase activity	1/2242	6/32470	0.34905	0.811172	0.743898	Lus10009574.g	1
GO:0034051	BP	negative regulation of plant-type hypersensitive response	1/2242	6/32470	0.34905	0.811172	0.743898	Lus10021940.g	1
GO:0042304	BP	regulation of fatty acid biosynthetic process	1/2242	6/32470	0.34905	0.811172	0.743898	Lus10018594.g	1
GO:0043649	BP	dicarboxylic acid catabolic process	1/2242	6/32470	0.34905	0.811172	0.743898	Lus10027477.g	1
GO:0045948	BP	positive regulation of translational initiation	1/2242	6/32470	0.34905	0.811172	0.743898	Lus10023619.g	1
GO:0047215	MF	indole-3-acetate beta-glucosyltransferase activity	1/2242	6/32470	0.34905	0.811172	0.743898	Lus10006353.g	1
GO:0047654	MF	alliin lyase activity	1/2242	6/32470	0.34905	0.811172	0.743898	Lus10028695.g	1
GO:0050992	BP	dimethylallyl diphosphate biosynthetic process	1/2242	6/32470	0.34905	0.811172	0.743898	Lus10026322.g	1
GO:0050993	BP	dimethylallyl diphosphate metabolic process	1/2242	6/32470	0.34905	0.811172	0.743898	Lus10026322.g	1
GO:0051745	MF	4-hydroxy-3-methylbut-2-en-1-yl diphosphate reductase activity	1/2242	6/32470	0.34905	0.811172	0.743898	Lus10026322.g	1
GO:0051938	BP	L-glutamate import	1/2242	6/32470	0.34905	0.811172	0.743898	Lus10018692.g	1
GO:0061013	BP	regulation of mRNA catabolic process	1/2242	6/32470	0.34905	0.811172	0.743898	Lus10023619.g	1
GO:0061014	BP	positive regulation of mRNA catabolic process	1/2242	6/32470	0.34905	0.811172	0.743898	Lus10023619.g	1
GO:0061731	MF	ribonucleoside-diphosphate reductase activity	1/2242	6/32470	0.34905	0.811172	0.743898	Lus10018867.g	1
GO:0070548	MF	L-glutamine aminotransferase activity	1/2242	6/32470	0.34905	0.811172	0.743898	scaffold34.66	1
GO:0071008	CC	U2-type post-mRNA release spliceosomal complex	1/2242	6/32470	0.34905	0.811172	0.743898	Lus10002251.g	1
GO:0071423	BP	malate transmembrane transport	1/2242	6/32470	0.34905	0.811172	0.743898	Lus10027321.g	1
GO:0072337	BP	modified amino acid transport	1/2242	6/32470	0.34905	0.811172	0.743898	Lus10008964.g	1
GO:0090481	BP	pyrimidine nucleotide-sugar transmembrane transport	1/2242	6/32470	0.34905	0.811172	0.743898	Lus10029605.g	1
GO:0097576	BP	vacuole fusion	1/2242	6/32470	0.34905	0.811172	0.743898	Lus10014310.g	1
GO:1902407	BP	assembly of actomyosin apparatus involved in mitotic cytokinesis	1/2242	6/32470	0.34905	0.811172	0.743898	scaffold161.1	1
GO:1903313	BP	positive regulation of mRNA metabolic process	1/2242	6/32470	0.34905	0.811172	0.743898	Lus10023619.g	1
GO:0015267	MF	channel activity	17/2242	220/32470	0.351087	0.814759	0.747188	Lus10040652.g/Lus10038148.g/Lus10005221.g/Lus10007878.g/Lus10037895.g/Lus10016878.g/Lus10018594.g/Lus10035281.g/Lus10019442.g/Lus10004153.g/Lus10024477.g/Lus10031320.g/Lus10031891.g/Lus10013127.g/Lus10037904.g/Lus10000913.g/Lus10043298.g	17
GO:0022803	MF	passive transmembrane transporter activity	17/2242	220/32470	0.351087	0.814759	0.747188	Lus10040652.g/Lus10038148.g/Lus10005221.g/Lus10007878.g/Lus10037895.g/Lus10016878.g/Lus10018594.g/Lus10035281.g/Lus10019442.g/Lus10004153.g/Lus10024477.g/Lus10031320.g/Lus10031891.g/Lus10013127.g/Lus10037904.g/Lus10000913.g/Lus10043298.g	17
GO:0009119	BP	ribonucleoside metabolic process	8/2242	97/32470	0.35456	0.82124	0.753131	scaffold251.59/Lus10001862.g/Lus10040973.g/Lus10037672.g/Lus10022102.g/Lus10035083.g/Lus10015966.g/Lus10023021.g	8
GO:0016597	MF	amino acid binding	8/2242	97/32470	0.35456	0.82124	0.753131	Lus10012550.g/Lus10004153.g/Lus10004948.g/Lus10033394.g/Lus10022085.g/Lus10017470.g/Lus10041543.g/Lus10037334.g	8
GO:0003995	MF	acyl-CoA dehydrogenase activity	2/2242	18/32470	0.355871	0.82124	0.753131	Lus10020908.g/Lus10024038.g	2
GO:0010252	BP	auxin homeostasis	2/2242	18/32470	0.355871	0.82124	0.753131	Lus10020193.g/Lus10026994.g	2
GO:0031056	BP	regulation of histone modification	2/2242	18/32470	0.355871	0.82124	0.753131	Lus10010733.g/Lus10036678.g	2
GO:0033764	MF	steroid dehydrogenase activity, acting on the CH-OH group of donors, NAD or NADP as acceptor	2/2242	18/32470	0.355871	0.82124	0.753131	Lus10008775.g/Lus10008774.g	2
GO:0071265	BP	L-methionine biosynthetic process	2/2242	18/32470	0.355871	0.82124	0.753131	Lus10021902.g/Lus10015966.g	2
GO:0090068	BP	positive regulation of cell cycle process	2/2242	18/32470	0.355871	0.82124	0.753131	Lus10019636.g/Lus10014595.g	2
GO:0006897	BP	endocytosis	5/2242	57/32470	0.358049	0.825112	0.756682	Lus10029873.g/Lus10043181.g/Lus10020672.g/Lus10011113.g/Lus10037621.g	5
GO:0042558	BP	pteridine-containing compound metabolic process	5/2242	57/32470	0.358049	0.825112	0.756682	Lus10026933.g/Lus10004694.g/Lus10020132.g/Lus10040261.g/Lus10042923.g	5
GO:0005244	MF	voltage-gated ion channel activity	7/2242	84/32470	0.360324	0.828621	0.759899	Lus10005221.g/Lus10018594.g/Lus10019442.g/Lus10031320.g/Lus10031891.g/Lus10037904.g/Lus10043298.g	7
GO:0022832	MF	voltage-gated channel activity	7/2242	84/32470	0.360324	0.828621	0.759899	Lus10005221.g/Lus10018594.g/Lus10019442.g/Lus10031320.g/Lus10031891.g/Lus10037904.g/Lus10043298.g	7
GO:0031968	CC	organelle outer membrane	7/2242	84/32470	0.360324	0.828621	0.759899	Lus10025846.g/Lus10038254.g/Lus10000651.g/Lus10036973.g/Lus10042575.g/Lus10022034.g/Lus10031863.g	7
GO:0010647	BP	positive regulation of cell communication	3/2242	31/32470	0.362572	0.829743	0.760928	Lus10027969.g/Lus10022265.g/Lus10001137.g	3
GO:0032434	BP	regulation of proteasomal ubiquitin-dependent protein catabolic process	3/2242	31/32470	0.362572	0.829743	0.760928	Lus10035332.g/Lus10024093.g/Lus10026104.g	3
GO:0048443	BP	stamen development	3/2242	31/32470	0.362572	0.829743	0.760928	scaffold272.125/Lus10004646.g/Lus10041794.g	3
GO:0048466	BP	androecium development	3/2242	31/32470	0.362572	0.829743	0.760928	scaffold272.125/Lus10004646.g/Lus10041794.g	3
GO:0061136	BP	regulation of proteasomal protein catabolic process	3/2242	31/32470	0.362572	0.829743	0.760928	Lus10035332.g/Lus10024093.g/Lus10026104.g	3
GO:1903050	BP	regulation of proteolysis involved in cellular protein catabolic process	3/2242	31/32470	0.362572	0.829743	0.760928	Lus10035332.g/Lus10024093.g/Lus10026104.g	3
GO:1903362	BP	regulation of cellular protein catabolic process	3/2242	31/32470	0.362572	0.829743	0.760928	Lus10035332.g/Lus10024093.g/Lus10026104.g	3
GO:0045017	BP	glycerolipid biosynthetic process	8/2242	99/32470	0.375824	0.849815	0.779336	Lus10029873.g/Lus10014075.g/Lus10019840.g/Lus10020672.g/Lus10037446.g/Lus10026489.g/Lus10007662.g/Lus10035633.g	8
GO:0071702	BP	organic substance transport	98/2242	1372/32470	0.376804	0.849815	0.779336	Lus10000310.g/Lus10015754.g/Lus10018873.g/Lus10025152.g/scaffold51.48/Lus10015279.g/Lus10011335.g/scaffold46.47/Lus10014932.g/Lus10008352.g/Lus10005239.g/Lus10024614.g/Lus10033814.g/Lus10003903.g/Lus10030683.g/Lus10032252.g/Lus10003738.g/Lus10025800.g/Lus10029966.g/Lus10018992.g/Lus10022753.g/Lus10007691.g/Lus10035354.g/Lus10038639.g/Lus10029605.g/Lus10012211.g/Lus10018189.g/Lus10011288.g/Lus1000…	98
GO:0051156	BP	glucose 6-phosphate metabolic process	4/2242	45/32470	0.377552	0.849815	0.779336	Lus10032078.g/Lus10014614.g/Lus10015715.g/Lus10032079.g	4
GO:0051656	BP	establishment of organelle localization	4/2242	45/32470	0.377552	0.849815	0.779336	Lus10016626.g/Lus10022531.g/Lus10017614.g/Lus10033572.g	4
GO:0030244	BP	cellulose biosynthetic process	6/2242	72/32470	0.378758	0.849815	0.779336	Lus10032415.g/Lus10023057.g/Lus10034664.g/Lus10023056.g/Lus10017868.g/Lus10039607.g	6
GO:0009416	BP	response to light stimulus	21/2242	280/32470	0.379463	0.849815	0.779336	Lus10005106.g/Lus10017223.g/Lus10006369.g/Lus10002900.g/Lus10035472.g/Lus10037819.g/Lus10031826.g/Lus10038823.g/Lus10002028.g/Lus10037584.g/Lus10035332.g/Lus10011777.g/Lus10007459.g/Lus10003810.g/Lus10012657.g/Lus10021270.g/Lus10043103.g/Lus10017724.g/Lus10004462.g/Lus10041508.g/Lus10031087.g	21
GO:0000295	MF	adenine nucleotide transmembrane transporter activity	2/2242	19/32470	0.381309	0.849815	0.779336	Lus10029605.g/Lus10008572.g	2
GO:0004017	MF	adenylate kinase activity	2/2242	19/32470	0.381309	0.849815	0.779336	Lus10016644.g/Lus10001984.g	2
GO:0004089	MF	carbonate dehydratase activity	2/2242	19/32470	0.381309	0.849815	0.779336	Lus10009274.g/Lus10015833.g	2
GO:0004470	MF	malic enzyme activity	2/2242	19/32470	0.381309	0.849815	0.779336	Lus10034963.g/Lus10012964.g	2
GO:0004471	MF	malate dehydrogenase (decarboxylating) (NAD+) activity	2/2242	19/32470	0.381309	0.849815	0.779336	Lus10034963.g/Lus10012964.g	2
GO:0005346	MF	purine ribonucleotide transmembrane transporter activity	2/2242	19/32470	0.381309	0.849815	0.779336	Lus10029605.g/Lus10008572.g	2
GO:0008655	BP	pyrimidine-containing compound salvage	2/2242	19/32470	0.381309	0.849815	0.779336	Lus10009040.g/Lus10009678.g	2
GO:0010675	BP	regulation of cellular carbohydrate metabolic process	2/2242	19/32470	0.381309	0.849815	0.779336	Lus10002356.g/Lus10003149.g	2
GO:0015215	MF	nucleotide transmembrane transporter activity	2/2242	19/32470	0.381309	0.849815	0.779336	Lus10029605.g/Lus10008572.g	2
GO:0015216	MF	purine nucleotide transmembrane transporter activity	2/2242	19/32470	0.381309	0.849815	0.779336	Lus10029605.g/Lus10008572.g	2
GO:0019722	BP	calcium-mediated signaling	2/2242	19/32470	0.381309	0.849815	0.779336	Lus10018594.g/Lus10000502.g	2
GO:0019932	BP	second-messenger-mediated signaling	2/2242	19/32470	0.381309	0.849815	0.779336	Lus10018594.g/Lus10000502.g	2
GO:0043097	BP	pyrimidine nucleoside salvage	2/2242	19/32470	0.381309	0.849815	0.779336	Lus10009040.g/Lus10009678.g	2
GO:0045289	MF	luciferin monooxygenase activity	2/2242	19/32470	0.381309	0.849815	0.779336	Lus10005390.g/Lus10012280.g	2
GO:0046992	MF	oxidoreductase activity, acting on X-H and Y-H to form an X-Y bond	2/2242	19/32470	0.381309	0.849815	0.779336	Lus10009009.g/Lus10038440.g	2
GO:0046993	MF	oxidoreductase activity, acting on X-H and Y-H to form an X-Y bond, with oxygen as acceptor	2/2242	19/32470	0.381309	0.849815	0.779336	Lus10009009.g/Lus10038440.g	2
GO:0047077	MF	Photinus-luciferin 4-monooxygenase (ATP-hydrolyzing) activity	2/2242	19/32470	0.381309	0.849815	0.779336	Lus10005390.g/Lus10012280.g	2
GO:0050468	MF	reticuline oxidase activity	2/2242	19/32470	0.381309	0.849815	0.779336	Lus10009009.g/Lus10038440.g	2
GO:0050664	MF	oxidoreductase activity, acting on NAD(P)H, oxygen as acceptor	2/2242	19/32470	0.381309	0.849815	0.779336	Lus10017527.g/Lus10028755.g	2
GO:1901568	BP	fatty acid derivative metabolic process	2/2242	19/32470	0.381309	0.849815	0.779336	Lus10028171.g/Lus10029336.g	2
GO:0010941	BP	regulation of cell death	3/2242	32/32470	0.381804	0.849815	0.779336	Lus10021940.g/Lus10010133.g/scaffold847.22	3
GO:0044403	BP	symbiont process	3/2242	32/32470	0.381804	0.849815	0.779336	Lus10030942.g/Lus10037136.g/Lus10040105.g	3
GO:0051259	BP	protein complex oligomerization	3/2242	32/32470	0.381804	0.849815	0.779336	Lus10036274.g/Lus10043181.g/Lus10014795.g	3
GO:0012501	BP	programmed cell death	5/2242	59/32470	0.386032	0.849815	0.779336	Lus10003660.g/Lus10035832.g/Lus10021940.g/Lus10010133.g/scaffold847.22	5
GO:0006413	BP	translational initiation	16/2242	211/32470	0.386059	0.849815	0.779336	Lus10002264.g/Lus10000920.g/Lus10021532.g/Lus10015124.g/Lus10030422.g/Lus10033806.g/Lus10011938.g/Lus10007763.g/Lus10037136.g/Lus10039660.g/Lus10034314.g/Lus10005100.g/Lus10026637.g/Lus10023619.g/Lus10017289.g/Lus10014386.g	16
GO:0016706	MF	oxidoreductase activity, acting on paired donors, with incorporation or reduction of molecular oxygen, 2-oxoglutarate as one donor, and incorporation of one atom each of oxygen into both donors	9/2242	114/32470	0.38876	0.849815	0.779336	Lus10007818.g/Lus10001109.g/Lus10032574.g/Lus10006759.g/Lus10023851.g/Lus10022192.g/Lus10022191.g/Lus10017249.g/Lus10000711.g	9
GO:0006575	BP	cellular modified amino acid metabolic process	11/2242	142/32470	0.391546	0.849815	0.779336	Lus10026643.g/Lus10030414.g/Lus10026933.g/Lus10004694.g/Lus10020132.g/Lus10015049.g/Lus10007897.g/Lus10015966.g/Lus10040261.g/Lus10042923.g/Lus10042756.g	11
GO:0005802	CC	trans-Golgi network	18/2242	240/32470	0.393085	0.849815	0.779336	Lus10025800.g/Lus10035862.g/Lus10021463.g/Lus10016095.g/Lus10018868.g/Lus10038582.g/scaffold612.27/scaffold505.103/Lus10037882.g/Lus10011799.g/Lus10037830.g/Lus10018554.g/Lus10024476.g/Lus10019502.g/Lus10022238.g/Lus10028563.g/Lus10032391.g/Lus10023077.g	18
GO:0001933	BP	negative regulation of protein phosphorylation	1/2242	7/32470	0.394005	0.849815	0.779336	Lus10021940.g	1
GO:0002020	MF	protease binding	1/2242	7/32470	0.394005	0.849815	0.779336	Lus10033382.g	1
GO:0003857	MF	3-hydroxyacyl-CoA dehydrogenase activity	1/2242	7/32470	0.394005	0.849815	0.779336	Lus10006502.g	1
GO:0003962	MF	cystathionine gamma-synthase activity	1/2242	7/32470	0.394005	0.849815	0.779336	Lus10017333.g	1
GO:0004001	MF	adenosine kinase activity	1/2242	7/32470	0.394005	0.849815	0.779336	Lus10023021.g	1
GO:0004008	MF	copper-exporting ATPase activity	1/2242	7/32470	0.394005	0.849815	0.779336	Lus10009789.g	1
GO:0004794	MF	L-threonine ammonia-lyase activity	1/2242	7/32470	0.394005	0.849815	0.779336	scaffold464.140	1
GO:0005049	MF	nuclear export signal receptor activity	1/2242	7/32470	0.394005	0.849815	0.779336	Lus10042566.g	1
GO:0006102	BP	isocitrate metabolic process	1/2242	7/32470	0.394005	0.849815	0.779336	Lus10012111.g	1
GO:0006166	BP	purine ribonucleoside salvage	1/2242	7/32470	0.394005	0.849815	0.779336	Lus10023021.g	1
GO:0006278	BP	RNA-dependent DNA biosynthetic process	1/2242	7/32470	0.394005	0.849815	0.779336	Lus10016644.g	1
GO:0006469	BP	negative regulation of protein kinase activity	1/2242	7/32470	0.394005	0.849815	0.779336	Lus10021940.g	1
GO:0006655	BP	phosphatidylglycerol biosynthetic process	1/2242	7/32470	0.394005	0.849815	0.779336	Lus10007662.g	1
GO:0007004	BP	telomere maintenance via telomerase	1/2242	7/32470	0.394005	0.849815	0.779336	Lus10016644.g	1
GO:0009292	BP	genetic transfer	1/2242	7/32470	0.394005	0.849815	0.779336	Lus10037630.g	1
GO:0009294	BP	DNA mediated transformation	1/2242	7/32470	0.394005	0.849815	0.779336	Lus10037630.g	1
GO:0009688	BP	abscisic acid biosynthetic process	1/2242	7/32470	0.394005	0.849815	0.779336	Lus10016354.g	1
GO:0009887	BP	animal organ morphogenesis	1/2242	7/32470	0.394005	0.849815	0.779336	Lus10007231.g	1
GO:0010044	BP	response to aluminum ion	1/2242	7/32470	0.394005	0.849815	0.779336	Lus10019636.g	1
GO:0010052	BP	guard cell differentiation	1/2242	7/32470	0.394005	0.849815	0.779336	scaffold33.133	1
GO:0010833	BP	telomere maintenance via telomere lengthening	1/2242	7/32470	0.394005	0.849815	0.779336	Lus10016644.g	1
GO:0010942	BP	positive regulation of cell death	1/2242	7/32470	0.394005	0.849815	0.779336	Lus10010133.g	1
GO:0015194	MF	L-serine transmembrane transporter activity	1/2242	7/32470	0.394005	0.849815	0.779336	Lus10004430.g	1
GO:0016151	MF	nickel cation binding	1/2242	7/32470	0.394005	0.849815	0.779336	Lus10036993.g	1
GO:0016442	CC	RISC complex	1/2242	7/32470	0.394005	0.849815	0.779336	Lus10019588.g	1
GO:0016711	MF	flavonoid 3'-monooxygenase activity	1/2242	7/32470	0.394005	0.849815	0.779336	Lus10001670.g	1
GO:0017108	MF	5'-flap endonuclease activity	1/2242	7/32470	0.394005	0.849815	0.779336	Lus10004462.g	1
GO:0019284	BP	L-methionine salvage from S-adenosylmethionine	1/2242	7/32470	0.394005	0.849815	0.779336	Lus10015966.g	1
GO:0022889	MF	serine transmembrane transporter activity	1/2242	7/32470	0.394005	0.849815	0.779336	Lus10004430.g	1
GO:0030030	BP	cell projection organization	1/2242	7/32470	0.394005	0.849815	0.779336	Lus10017359.g	1
GO:0030031	BP	cell projection assembly	1/2242	7/32470	0.394005	0.849815	0.779336	Lus10017359.g	1
GO:0031332	CC	RNAi effector complex	1/2242	7/32470	0.394005	0.849815	0.779336	Lus10019588.g	1
GO:0033673	BP	negative regulation of kinase activity	1/2242	7/32470	0.394005	0.849815	0.779336	Lus10021940.g	1
GO:0042326	BP	negative regulation of phosphorylation	1/2242	7/32470	0.394005	0.849815	0.779336	Lus10021940.g	1
GO:0043289	BP	apocarotenoid biosynthetic process	1/2242	7/32470	0.394005	0.849815	0.779336	Lus10016354.g	1
GO:0043455	BP	regulation of secondary metabolic process	1/2242	7/32470	0.394005	0.849815	0.779336	Lus10016354.g	1
GO:0043605	BP	cellular amide catabolic process	1/2242	7/32470	0.394005	0.849815	0.779336	Lus10036993.g	1
GO:0044375	BP	regulation of peroxisome size	1/2242	7/32470	0.394005	0.849815	0.779336	Lus10003945.g	1
GO:0044764	BP	multi-organism cellular process	1/2242	7/32470	0.394005	0.849815	0.779336	Lus10037630.g	1
GO:0045430	MF	chalcone isomerase activity	1/2242	7/32470	0.394005	0.849815	0.779336	Lus10003311.g	1
GO:0046471	BP	phosphatidylglycerol metabolic process	1/2242	7/32470	0.394005	0.849815	0.779336	Lus10007662.g	1
GO:0046592	MF	polyamine oxidase activity	1/2242	7/32470	0.394005	0.849815	0.779336	Lus10042168.g	1
GO:0047220	MF	galactosylxylosylprotein 3-beta-galactosyltransferase activity	1/2242	7/32470	0.394005	0.849815	0.779336	Lus10012822.g	1
GO:0048040	MF	UDP-glucuronate decarboxylase activity	1/2242	7/32470	0.394005	0.849815	0.779336	Lus10005450.g	1
GO:0048213	BP	Golgi vesicle prefusion complex stabilization	1/2242	7/32470	0.394005	0.849815	0.779336	Lus10012049.g	1
GO:0048281	BP	inflorescence morphogenesis	1/2242	7/32470	0.394005	0.849815	0.779336	Lus10022636.g	1
GO:0050665	BP	hydrogen peroxide biosynthetic process	1/2242	7/32470	0.394005	0.849815	0.779336	Lus10023302.g	1
GO:0060147	BP	regulation of posttranscriptional gene silencing	1/2242	7/32470	0.394005	0.849815	0.779336	Lus10001012.g	1
GO:0060966	BP	regulation of gene silencing by RNA	1/2242	7/32470	0.394005	0.849815	0.779336	Lus10001012.g	1
GO:0120031	BP	plasma membrane bounded cell projection assembly	1/2242	7/32470	0.394005	0.849815	0.779336	Lus10017359.g	1
GO:0120036	BP	plasma membrane bounded cell projection organization	1/2242	7/32470	0.394005	0.849815	0.779336	Lus10017359.g	1
GO:1901292	BP	nucleoside phosphate catabolic process	1/2242	7/32470	0.394005	0.849815	0.779336	Lus10029160.g	1
GO:1902645	BP	tertiary alcohol biosynthetic process	1/2242	7/32470	0.394005	0.849815	0.779336	Lus10016354.g	1
GO:1905361	MF	L-serine transmembrane transporter activity	1/2242	7/32470	0.394005	0.849815	0.779336	Lus10004430.g	1
GO:0010629	BP	negative regulation of gene expression	24/2242	325/32470	0.396617	0.854887	0.783987	Lus10005134.g/scaffold370.2/Lus10012202.g/Lus10008007.g/Lus10019348.g/Lus10007849.g/Lus10009351.g/Lus10000951.g/Lus10004759.g/Lus10001012.g/Lus10012965.g/Lus10043200.g/Lus10029713.g/Lus10037136.g/Lus10021918.g/Lus10018061.g/Lus10021917.g/Lus10023619.g/Lus10019588.g/Lus10024485.g/Lus10021650.g/Lus10027113.g/Lus10041718.g/Lus10043433.g	24
GO:0008610	BP	lipid biosynthetic process	42/2242	580/32470	0.396875	0.854887	0.783987	scaffold272.125/Lus10039278.g/Lus10002191.g/Lus10000692.g/Lus10006058.g/Lus10027515.g/Lus10019671.g/Lus10029873.g/Lus10014075.g/Lus10018594.g/Lus10013703.g/Lus10028171.g/Lus10041794.g/Lus10040739.g/Lus10009467.g/Lus10005570.g/Lus10015222.g/Lus10039401.g/Lus10019840.g/Lus10020672.g/Lus10000672.g/Lus10006348.g/Lus10037446.g/Lus10001657.g/Lus10002356.g/Lus10026489.g/Lus10003149.g/Lus10007662.g/Lus10…	42
GO:0032440	MF	2-alkenal reductase [NAD(P)] activity	36/2242	495/32470	0.397656	0.856011	0.785018	Lus10010989.g/Lus10029966.g/Lus10002936.g/Lus10023418.g/Lus10034662.g/Lus10035354.g/Lus10011288.g/Lus10029970.g/Lus10017871.g/Lus10007983.g/Lus10027404.g/Lus10004574.g/Lus10007832.g/Lus10035332.g/Lus10002319.g/Lus10005103.g/Lus10010534.g/Lus10027567.g/Lus10009394.g/Lus10000484.g/Lus10004575.g/Lus10008828.g/Lus10042078.g/Lus10028303.g/Lus10011498.g/Lus10008939.g/Lus10041748.g/Lus10031350.g/Lus1003…	36
GO:0001228	MF	DNA-binding transcription activator activity, RNA polymerase II-specific	5/2242	60/32470	0.400005	0.858518	0.787318	Lus10031826.g/Lus10003119.g/Lus10028005.g/Lus10041126.g/Lus10025599.g	5
GO:0001046	MF	core promoter sequence-specific DNA binding	3/2242	33/32470	0.400902	0.858518	0.787318	Lus10031826.g/Lus10028005.g/Lus10025599.g	3
GO:0005991	BP	trehalose metabolic process	3/2242	33/32470	0.400902	0.858518	0.787318	Lus10005559.g/Lus10012990.g/Lus10021805.g	3
GO:0006074	BP	(1->3)-beta-D-glucan metabolic process	3/2242	33/32470	0.400902	0.858518	0.787318	Lus10020750.g/Lus10037469.g/Lus10007327.g	3
GO:0006298	BP	mismatch repair	3/2242	33/32470	0.400902	0.858518	0.787318	Lus10034734.g/Lus10033274.g/Lus10017724.g	3
GO:0010087	BP	phloem or xylem histogenesis	3/2242	33/32470	0.400902	0.858518	0.787318	Lus10000639.g/Lus10024485.g/Lus10000285.g	3
GO:0017137	MF	Rab GTPase binding	3/2242	33/32470	0.400902	0.858518	0.787318	Lus10002478.g/Lus10001254.g/Lus10040349.g	3
GO:0046351	BP	disaccharide biosynthetic process	3/2242	33/32470	0.400902	0.858518	0.787318	Lus10005559.g/Lus10012990.g/Lus10021805.g	3
GO:0003746	MF	translation elongation factor activity	6/2242	74/32470	0.403894	0.862294	0.79078	Lus10039078.g/Lus10038781.g/Lus10030422.g/Lus10027295.g/Lus10015293.g/Lus10026637.g	6
GO:0016874	MF	ligase activity	50/2242	696/32470	0.406049	0.862294	0.79078	Lus10014407.g/Lus10016083.g/Lus10037735.g/Lus10016870.g/Lus10028700.g/Lus10022077.g/Lus10008046.g/Lus10003877.g/Lus10013709.g/Lus10012211.g/Lus10037412.g/Lus10004694.g/Lus10041369.g/Lus10005220.g/Lus10033472.g/Lus10035332.g/Lus10012536.g/Lus10003218.g/Lus10016869.g/Lus10003792.g/Lus10036559.g/Lus10019908.g/Lus10017563.g/Lus10005390.g/Lus10013459.g/Lus10006828.g/Lus10033377.g/Lus10006638.g/Lus1002…	50
GO:0004427	MF	inorganic diphosphatase activity	2/2242	20/32470	0.406306	0.862294	0.79078	Lus10041767.g/Lus10008828.g	2
GO:0006558	BP	L-phenylalanine metabolic process	2/2242	20/32470	0.406306	0.862294	0.79078	Lus10028135.g/Lus10042839.g	2
GO:0010207	BP	photosystem II assembly	2/2242	20/32470	0.406306	0.862294	0.79078	Lus10038823.g/Lus10014934.g	2
GO:0016780	MF	phosphotransferase activity, for other substituted phosphate groups	2/2242	20/32470	0.406306	0.862294	0.79078	Lus10008521.g/Lus10007662.g	2
GO:0019915	BP	lipid storage	2/2242	20/32470	0.406306	0.862294	0.79078	Lus10034734.g/Lus10032127.g	2
GO:0043101	BP	purine-containing compound salvage	2/2242	20/32470	0.406306	0.862294	0.79078	Lus10001497.g/Lus10023021.g	2
GO:0045292	BP	mRNA cis splicing, via spliceosome	2/2242	20/32470	0.406306	0.862294	0.79078	Lus10000639.g/Lus10000285.g	2
GO:0071577	BP	zinc ion transmembrane transport	2/2242	20/32470	0.406306	0.862294	0.79078	Lus10024107.g/Lus10031872.g	2
GO:0090447	MF	glycerol-3-phosphate 2-O-acyltransferase activity	2/2242	20/32470	0.406306	0.862294	0.79078	Lus10002500.g/Lus10031396.g	2
GO:0090599	MF	alpha-glucosidase activity	2/2242	20/32470	0.406306	0.862294	0.79078	Lus10004340.g/Lus10028922.g	2
GO:1902221	BP	erythrose 4-phosphate/phosphoenolpyruvate family amino acid metabolic process	2/2242	20/32470	0.406306	0.862294	0.79078	Lus10028135.g/Lus10042839.g	2
GO:0048831	BP	regulation of shoot system development	7/2242	88/32470	0.406323	0.862294	0.79078	Lus10005106.g/Lus10017223.g/Lus10037032.g/Lus10027404.g/Lus10041721.g/Lus10007459.g/Lus10043200.g	7
GO:0016667	MF	oxidoreductase activity, acting on a sulfur group of donors	15/2242	200/32470	0.408531	0.865087	0.793342	Lus10003194.g/Lus10026878.g/Lus10003437.g/Lus10025845.g/Lus10034196.g/Lus10042104.g/Lus10041922.g/Lus10043103.g/Lus10012909.g/Lus10009574.g/Lus10001237.g/Lus10024982.g/Lus10024212.g/Lus10019847.g/Lus10036698.g	15
GO:0045087	BP	innate immune response	9/2242	116/32470	0.408768	0.865087	0.793342	Lus10035832.g/Lus10021940.g/Lus10041348.g/Lus10022265.g/Lus10023302.g/Lus10001137.g/Lus10037370.g/Lus10041679.g/Lus10037136.g	9
GO:0008654	BP	phospholipid biosynthetic process	10/2242	130/32470	0.409272	0.865087	0.793342	Lus10000692.g/Lus10019671.g/Lus10029873.g/Lus10020672.g/Lus10037446.g/Lus10002356.g/Lus10003149.g/Lus10007662.g/Lus10026322.g/Lus10035633.g	10
GO:0000103	BP	sulfate assimilation	4/2242	47/32470	0.409466	0.865087	0.793342	Lus10026878.g/Lus10003437.g/Lus10019847.g/Lus10036698.g	4
GO:0009914	BP	hormone transport	4/2242	47/32470	0.409466	0.865087	0.793342	Lus10008098.g/Lus10020193.g/Lus10026994.g/Lus10041508.g	4
GO:0060918	BP	auxin transport	4/2242	47/32470	0.409466	0.865087	0.793342	Lus10008098.g/Lus10020193.g/Lus10026994.g/Lus10041508.g	4
GO:0005216	MF	ion channel activity	11/2242	144/32470	0.409475	0.865087	0.793342	Lus10038148.g/Lus10005221.g/Lus10018594.g/Lus10019442.g/Lus10004153.g/Lus10024477.g/Lus10031320.g/Lus10031891.g/Lus10037904.g/Lus10000913.g/Lus10043298.g	11
GO:0005774	CC	vacuolar membrane	29/2242	399/32470	0.414694	0.874994	0.802427	Lus10040652.g/Lus10010618.g/Lus10030233.g/Lus10005933.g/Lus10012211.g/Lus10037895.g/Lus10018594.g/Lus10022924.g/Lus10010623.g/Lus10015032.g/Lus10034448.g/Lus10005934.g/Lus10031069.g/Lus10033808.g/Lus10009819.g/Lus10033179.g/Lus10040925.g/Lus10035765.g/Lus10010619.g/Lus10018989.g/Lus10002674.g/Lus10025565.g/Lus10024476.g/Lus10035283.g/Lus10033840.g/Lus10041508.g/Lus10037213.g/Lus10019502.g/Lus1002…	29
GO:0044437	CC	vacuolar part	29/2242	399/32470	0.414694	0.874994	0.802427	Lus10040652.g/Lus10010618.g/Lus10030233.g/Lus10005933.g/Lus10012211.g/Lus10037895.g/Lus10018594.g/Lus10022924.g/Lus10010623.g/Lus10015032.g/Lus10034448.g/Lus10005934.g/Lus10031069.g/Lus10033808.g/Lus10009819.g/Lus10033179.g/Lus10040925.g/Lus10035765.g/Lus10010619.g/Lus10018989.g/Lus10002674.g/Lus10025565.g/Lus10024476.g/Lus10035283.g/Lus10033840.g/Lus10041508.g/Lus10037213.g/Lus10019502.g/Lus1002…	29
GO:0046486	BP	glycerolipid metabolic process	16/2242	215/32470	0.415378	0.875877	0.803236	Lus10033706.g/Lus10031634.g/Lus10029873.g/Lus10014075.g/Lus10035175.g/Lus10012556.g/Lus10019840.g/Lus10020672.g/Lus10037446.g/Lus10026489.g/Lus10007662.g/Lus10002582.g/Lus10022074.g/Lus10015456.g/Lus10011337.g/Lus10035633.g	16
GO:0005096	MF	GTPase activator activity	7/2242	89/32470	0.417822	0.875926	0.803281	Lus10002478.g/Lus10004561.g/Lus10018445.g/Lus10038582.g/Lus10001254.g/Lus10037882.g/Lus10040349.g	7
GO:0004180	MF	carboxypeptidase activity	8/2242	103/32470	0.418522	0.875926	0.803281	Lus10007731.g/Lus10041000.g/Lus10018667.g/Lus10017223.g/Lus10011603.g/Lus10041817.g/Lus10039582.g/scaffold280.36	8
GO:0048284	BP	organelle fusion	10/2242	131/32470	0.418719	0.875926	0.803281	Lus10040213.g/Lus10018296.g/Lus10021270.g/Lus10017686.g/Lus10014310.g/Lus10037826.g/Lus10016516.g/Lus10000311.g/Lus10011737.g/Lus10040349.g	10
GO:0005667	CC	transcription factor complex	9/2242	117/32470	0.418774	0.875926	0.803281	Lus10011326.g/Lus10012202.g/Lus10038448.g/Lus10023358.g/Lus10023926.g/Lus10007763.g/Lus10005100.g/Lus10039455.g/Lus10030137.g	9
GO:0048856	BP	anatomical structure development	90/2242	1272/32470	0.419629	0.875926	0.803281	Lus10000310.g/Lus10015754.g/Lus10042731.g/Lus10030446.g/Lus10016056.g/scaffold272.125/Lus10027969.g/Lus10011335.g/Lus10021369.g/Lus10041310.g/Lus10020719.g/Lus10005106.g/Lus10041618.g/Lus10008098.g/Lus10017223.g/Lus10000659.g/Lus10006369.g/Lus10028001.g/Lus10017049.g/Lus10002900.g/Lus10040415.g/Lus10035472.g/Lus10022225.g/Lus10002500.g/Lus10031826.g/Lus10007231.g/Lus10029876.g/Lus10026617.g/Lus10…	90
GO:0032787	BP	monocarboxylic acid metabolic process	52/2242	728/32470	0.420022	0.875926	0.803281	Lus10016083.g/Lus10024583.g/Lus10039278.g/scaffold1247.34/Lus10002191.g/Lus10041003.g/C8303341.1/Lus10039994.g/Lus10028572.g/Lus10020908.g/Lus10006058.g/Lus10042839.g/Lus10027515.g/Lus10042262.g/scaffold274.9/Lus10018594.g/Lus10039277.g/Lus10011057.g/Lus10028171.g/Lus10040739.g/Lus10006502.g/Lus10034253.g/Lus10015222.g/Lus10039401.g/Lus10031819.g/Lus10024038.g/Lus10014437.g/Lus10003176.g/Lus10000…	52
GO:0005768	CC	endosome	21/2242	287/32470	0.42391	0.875926	0.803281	Lus10025800.g/Lus10005990.g/Lus10035862.g/Lus10021463.g/Lus10016095.g/Lus10018868.g/Lus10038582.g/Lus10043181.g/Lus10009819.g/Lus10040925.g/scaffold612.27/scaffold505.103/Lus10037882.g/Lus10037826.g/Lus10037830.g/Lus10018554.g/Lus10024476.g/Lus10019502.g/Lus10028563.g/Lus10032391.g/Lus10023077.g	21
GO:1901657	BP	glycosyl compound metabolic process	14/2242	188/32470	0.424724	0.875926	0.803281	scaffold217.69/Lus10009040.g/scaffold251.59/Lus10001862.g/Lus10040973.g/Lus10009678.g/Lus10032660.g/Lus10001497.g/Lus10037672.g/Lus10022102.g/Lus10026287.g/Lus10035083.g/Lus10015966.g/Lus10023021.g	14
GO:0005048	MF	signal sequence binding	4/2242	48/32470	0.425303	0.875926	0.803281	Lus10022763.g/Lus10003146.g/scaffold177.112/Lus10040614.g	4
GO:0016776	MF	phosphotransferase activity, phosphate group as acceptor	4/2242	48/32470	0.425303	0.875926	0.803281	Lus10010422.g/Lus10016644.g/Lus10012122.g/Lus10001984.g	4
GO:0019706	MF	protein-cysteine S-palmitoyltransferase activity	4/2242	48/32470	0.425303	0.875926	0.803281	Lus10040971.g/Lus10016754.g/Lus10033823.g/Lus10040833.g	4
GO:0019707	MF	protein-cysteine S-acyltransferase activity	4/2242	48/32470	0.425303	0.875926	0.803281	Lus10040971.g/Lus10016754.g/Lus10033823.g/Lus10040833.g	4
GO:0005506	MF	iron ion binding	47/2242	658/32470	0.426061	0.875926	0.803281	scaffold272.125/Lus10015788.g/Lus10027425.g/Lus10039278.g/Lus10034964.g/Lus10038896.g/Lus10008098.g/Lus10006058.g/Lus10016659.g/Lus10036079.g/Lus10030189.g/Lus10027515.g/Lus10006198.g/Lus10001109.g/Lus10025904.g/Lus10005774.g/Lus10040120.g/Lus10002865.g/Lus10041794.g/Lus10040739.g/Lus10017676.g/Lus10032689.g/Lus10018263.g/Lus10015018.g/Lus10034306.g/Lus10021902.g/Lus10038158.g/Lus10041951.g/Lus10…	47
GO:0010876	BP	lipid localization	11/2242	146/32470	0.42742	0.875926	0.803281	Lus10025152.g/Lus10015279.g/scaffold46.47/Lus10034734.g/Lus10042210.g/Lus10032127.g/scaffold903.52/Lus10024201.g/Lus10009911.g/Lus10022238.g/Lus10033406.g	11
GO:0015605	MF	organophosphate ester transmembrane transporter activity	5/2242	62/32470	0.42783	0.875926	0.803281	Lus10027725.g/Lus10029605.g/Lus10027727.g/Lus10033637.g/Lus10008572.g	5
GO:0004849	MF	uridine kinase activity	2/2242	21/32470	0.430803	0.875926	0.803281	Lus10009040.g/Lus10009678.g	2
GO:0006109	BP	regulation of carbohydrate metabolic process	2/2242	21/32470	0.430803	0.875926	0.803281	Lus10002356.g/Lus10003149.g	2
GO:0006312	BP	mitotic recombination	2/2242	21/32470	0.430803	0.875926	0.803281	Lus10021585.g/Lus10016644.g	2
GO:0008443	MF	phosphofructokinase activity	2/2242	21/32470	0.430803	0.875926	0.803281	Lus10039994.g/Lus10008812.g	2
GO:0010229	BP	inflorescence development	2/2242	21/32470	0.430803	0.875926	0.803281	Lus10017223.g/Lus10022636.g	2
GO:0031012	CC	extracellular matrix	2/2242	21/32470	0.430803	0.875926	0.803281	Lus10020319.g/Lus10005672.g	2
GO:0042807	CC	central vacuole	2/2242	21/32470	0.430803	0.875926	0.803281	Lus10040652.g/Lus10037895.g	2
GO:0048500	CC	signal recognition particle	2/2242	21/32470	0.430803	0.875926	0.803281	Lus10017891.g/Lus10040614.g	2
GO:0050321	MF	tau-protein kinase activity	2/2242	21/32470	0.430803	0.875926	0.803281	Lus10031350.g/Lus10010973.g	2
GO:0051053	BP	negative regulation of DNA metabolic process	2/2242	21/32470	0.430803	0.875926	0.803281	Lus10021767.g/Lus10017724.g	2
GO:0070290	MF	N-acylphosphatidylethanolamine-specific phospholipase D activity	2/2242	21/32470	0.430803	0.875926	0.803281	Lus10033706.g/Lus10031634.g	2
GO:0071902	BP	positive regulation of protein serine/threonine kinase activity	2/2242	21/32470	0.430803	0.875926	0.803281	Lus10022265.g/Lus10001137.g	2
GO:0015036	MF	disulfide oxidoreductase activity	12/2242	161/32470	0.435143	0.875926	0.803281	Lus10003194.g/Lus10026878.g/Lus10003437.g/Lus10025845.g/Lus10034196.g/Lus10042104.g/Lus10012909.g/Lus10001237.g/Lus10024982.g/Lus10024212.g/Lus10019847.g/Lus10036698.g	12
GO:0000002	BP	mitochondrial genome maintenance	1/2242	8/32470	0.435857	0.875926	0.803281	Lus10021767.g	1
GO:0000578	BP	embryonic axis specification	1/2242	8/32470	0.435857	0.875926	0.803281	Lus10004646.g	1
GO:0002229	BP	defense response to oomycetes	1/2242	8/32470	0.435857	0.875926	0.803281	Lus10008964.g	1
GO:0003994	MF	aconitate hydratase activity	1/2242	8/32470	0.435857	0.875926	0.803281	Lus10031561.g	1
GO:0004449	MF	isocitrate dehydrogenase (NAD+) activity	1/2242	8/32470	0.435857	0.875926	0.803281	Lus10013806.g	1
GO:0004791	MF	thioredoxin-disulfide reductase activity	1/2242	8/32470	0.435857	0.875926	0.803281	Lus10025845.g	1
GO:0005793	CC	endoplasmic reticulum-Golgi intermediate compartment	1/2242	8/32470	0.435857	0.875926	0.803281	Lus10016066.g	1
GO:0008113	MF	peptide-methionine (S)-S-oxide reductase activity	1/2242	8/32470	0.435857	0.875926	0.803281	Lus10041922.g	1
GO:0009115	BP	xanthine catabolic process	1/2242	8/32470	0.435857	0.875926	0.803281	Lus10034306.g	1
GO:0009200	BP	deoxyribonucleoside triphosphate metabolic process	1/2242	8/32470	0.435857	0.875926	0.803281	Lus10029160.g	1
GO:0009540	MF	zeaxanthin epoxidase [overall] activity	1/2242	8/32470	0.435857	0.875926	0.803281	Lus10011000.g	1
GO:0009624	BP	response to nematode	1/2242	8/32470	0.435857	0.875926	0.803281	Lus10006804.g	1
GO:0009678	MF	hydrogen-translocating pyrophosphatase activity	1/2242	8/32470	0.435857	0.875926	0.803281	Lus10008828.g	1
GO:0009750	BP	response to fructose	1/2242	8/32470	0.435857	0.875926	0.803281	Lus10016354.g	1
GO:0009785	BP	blue light signaling pathway	1/2242	8/32470	0.435857	0.875926	0.803281	Lus10037819.g	1
GO:0009900	BP	dehiscence	1/2242	8/32470	0.435857	0.875926	0.803281	Lus10043200.g	1
GO:0009937	BP	regulation of gibberellic acid mediated signaling pathway	1/2242	8/32470	0.435857	0.875926	0.803281	Lus10027969.g	1
GO:0010082	BP	regulation of root meristem growth	1/2242	8/32470	0.435857	0.875926	0.803281	Lus10017223.g	1
GO:0010363	BP	regulation of plant-type hypersensitive response	1/2242	8/32470	0.435857	0.875926	0.803281	Lus10021940.g	1
GO:0010497	BP	plasmodesmata-mediated intercellular transport	1/2242	8/32470	0.435857	0.875926	0.803281	Lus10019636.g	1
GO:0015165	MF	pyrimidine nucleotide-sugar transmembrane transporter activity	1/2242	8/32470	0.435857	0.875926	0.803281	Lus10029605.g	1
GO:0015802	BP	basic amino acid transport	1/2242	8/32470	0.435857	0.875926	0.803281	Lus10037544.g	1
GO:0016233	BP	telomere capping	1/2242	8/32470	0.435857	0.875926	0.803281	Lus10016644.g	1
GO:0019217	BP	regulation of fatty acid metabolic process	1/2242	8/32470	0.435857	0.875926	0.803281	Lus10018594.g	1
GO:0019253	BP	reductive pentose-phosphate cycle	1/2242	8/32470	0.435857	0.875926	0.803281	Lus10015715.g	1
GO:0019685	BP	photosynthesis, dark reaction	1/2242	8/32470	0.435857	0.875926	0.803281	Lus10015715.g	1
GO:0022821	MF	potassium ion antiporter activity	1/2242	8/32470	0.435857	0.875926	0.803281	Lus10035765.g	1
GO:0030522	BP	intracellular receptor signaling pathway	1/2242	8/32470	0.435857	0.875926	0.803281	Lus10037819.g	1
GO:0031177	MF	phosphopantetheine binding	1/2242	8/32470	0.435857	0.875926	0.803281	Lus10018986.g	1
GO:0032968	BP	positive regulation of transcription elongation from RNA polymerase II promoter	1/2242	8/32470	0.435857	0.875926	0.803281	Lus10017289.g	1
GO:0033037	BP	polysaccharide localization	1/2242	8/32470	0.435857	0.875926	0.803281	Lus10007372.g	1
GO:0033353	BP	S-adenosylmethionine cycle	1/2242	8/32470	0.435857	0.875926	0.803281	Lus10015966.g	1
GO:0042981	BP	regulation of apoptotic process	1/2242	8/32470	0.435857	0.875926	0.803281	scaffold847.22	1
GO:0043096	BP	purine nucleobase salvage	1/2242	8/32470	0.435857	0.875926	0.803281	Lus10001497.g	1
GO:0046110	BP	xanthine metabolic process	1/2242	8/32470	0.435857	0.875926	0.803281	Lus10034306.g	1
GO:0046439	BP	L-cysteine metabolic process	1/2242	8/32470	0.435857	0.875926	0.803281	Lus10015966.g	1
GO:0046498	BP	S-adenosylhomocysteine metabolic process	1/2242	8/32470	0.435857	0.875926	0.803281	Lus10015966.g	1
GO:0046593	MF	mandelonitrile lyase activity	1/2242	8/32470	0.435857	0.875926	0.803281	Lus10003176.g	1
GO:0050105	MF	L-gulonolactone oxidase activity	1/2242	8/32470	0.435857	0.875926	0.803281	Lus10038620.g	1
GO:0052545	BP	callose localization	1/2242	8/32470	0.435857	0.875926	0.803281	Lus10007372.g	1
GO:0052662	MF	zeaxanthin epoxidase activity	1/2242	8/32470	0.435857	0.875926	0.803281	Lus10011000.g	1
GO:0052663	MF	antheraxanthin epoxidase activity	1/2242	8/32470	0.435857	0.875926	0.803281	Lus10011000.g	1
GO:0052736	MF	beta-glucanase activity	1/2242	8/32470	0.435857	0.875926	0.803281	Lus10037377.g	1
GO:0070084	BP	protein initiator methionine removal	1/2242	8/32470	0.435857	0.875926	0.803281	Lus10000403.g	1
GO:0072531	BP	pyrimidine-containing compound transmembrane transport	1/2242	8/32470	0.435857	0.875926	0.803281	Lus10029605.g	1
GO:1901989	BP	positive regulation of cell cycle phase transition	1/2242	8/32470	0.435857	0.875926	0.803281	Lus10014595.g	1
GO:1901992	BP	positive regulation of mitotic cell cycle phase transition	1/2242	8/32470	0.435857	0.875926	0.803281	Lus10014595.g	1
GO:1903338	BP	regulation of cell wall organization or biogenesis	1/2242	8/32470	0.435857	0.875926	0.803281	Lus10024485.g	1
GO:0006635	BP	fatty acid beta-oxidation	3/2242	35/32470	0.43855	0.875926	0.803281	Lus10020908.g/Lus10024038.g/Lus10012306.g	3
GO:0008023	CC	transcription elongation factor complex	3/2242	35/32470	0.43855	0.875926	0.803281	Lus10027295.g/Lus10001102.g/Lus10033586.g	3
GO:0008360	BP	regulation of cell shape	3/2242	35/32470	0.43855	0.875926	0.803281	Lus10037469.g/Lus10011113.g/Lus10037621.g	3
GO:0009062	BP	fatty acid catabolic process	3/2242	35/32470	0.43855	0.875926	0.803281	Lus10020908.g/Lus10024038.g/Lus10012306.g	3
GO:0031050	BP	dsRNA processing	3/2242	35/32470	0.43855	0.875926	0.803281	Lus10037136.g/Lus10019588.g/Lus10027113.g	3
GO:0042451	BP	purine nucleoside biosynthetic process	3/2242	35/32470	0.43855	0.875926	0.803281	Lus10040973.g/Lus10035083.g/Lus10023021.g	3
GO:0043331	BP	response to dsRNA	3/2242	35/32470	0.43855	0.875926	0.803281	Lus10037136.g/Lus10019588.g/Lus10027113.g	3
GO:0045860	BP	positive regulation of protein kinase activity	3/2242	35/32470	0.43855	0.875926	0.803281	Lus10022265.g/Lus10001137.g/Lus10007022.g	3
GO:0046129	BP	purine ribonucleoside biosynthetic process	3/2242	35/32470	0.43855	0.875926	0.803281	Lus10040973.g/Lus10035083.g/Lus10023021.g	3
GO:0070918	BP	production of small RNA involved in gene silencing by RNA	3/2242	35/32470	0.43855	0.875926	0.803281	Lus10037136.g/Lus10019588.g/Lus10027113.g	3
GO:0071359	BP	cellular response to dsRNA	3/2242	35/32470	0.43855	0.875926	0.803281	Lus10037136.g/Lus10019588.g/Lus10027113.g	3
GO:0061025	BP	membrane fusion	9/2242	119/32470	0.438759	0.875926	0.803281	Lus10012211.g/Lus10040213.g/Lus10018296.g/Lus10017686.g/Lus10037826.g/Lus10016516.g/Lus10000311.g/Lus10011737.g/Lus10040349.g	9
GO:0051049	BP	regulation of transport	7/2242	91/32470	0.44075	0.876393	0.80371	Lus10002478.g/Lus10029873.g/Lus10018594.g/Lus10001254.g/Lus10020672.g/Lus10037826.g/Lus10040349.g	7
GO:0004536	MF	deoxyribonuclease activity	4/2242	49/32470	0.441029	0.876393	0.80371	Lus10021585.g/Lus10016644.g/Lus10025575.g/Lus10004462.g	4
GO:0006026	BP	aminoglycan catabolic process	6/2242	77/32470	0.441421	0.876393	0.80371	Lus10010866.g/Lus10000193.g/Lus10019061.g/Lus10024366.g/Lus10040020.g/Lus10032626.g	6
GO:0006030	BP	chitin metabolic process	6/2242	77/32470	0.441421	0.876393	0.80371	Lus10010866.g/Lus10000193.g/Lus10019061.g/Lus10024366.g/Lus10040020.g/Lus10032626.g	6
GO:0006032	BP	chitin catabolic process	6/2242	77/32470	0.441421	0.876393	0.80371	Lus10010866.g/Lus10000193.g/Lus10019061.g/Lus10024366.g/Lus10040020.g/Lus10032626.g	6
GO:0034599	BP	cellular response to oxidative stress	6/2242	77/32470	0.441421	0.876393	0.80371	Lus10026878.g/Lus10021940.g/Lus10003437.g/Lus10025845.g/Lus10019847.g/Lus10036698.g	6
GO:0046348	BP	amino sugar catabolic process	6/2242	77/32470	0.441421	0.876393	0.80371	Lus10010866.g/Lus10000193.g/Lus10019061.g/Lus10024366.g/Lus10040020.g/Lus10032626.g	6
GO:1901071	BP	glucosamine-containing compound metabolic process	6/2242	77/32470	0.441421	0.876393	0.80371	Lus10010866.g/Lus10000193.g/Lus10019061.g/Lus10024366.g/Lus10040020.g/Lus10032626.g	6
GO:1901072	BP	glucosamine-containing compound catabolic process	6/2242	77/32470	0.441421	0.876393	0.80371	Lus10010866.g/Lus10000193.g/Lus10019061.g/Lus10024366.g/Lus10040020.g/Lus10032626.g	6
GO:0031301	CC	integral component of organelle membrane	5/2242	63/32470	0.441649	0.876393	0.80371	Lus10029605.g/Lus10016878.g/Lus10042575.g/Lus10022034.g/Lus10003945.g	5
GO:0031406	MF	carboxylic acid binding	12/2242	162/32470	0.443699	0.878348	0.805502	Lus10020719.g/Lus10012550.g/Lus10004153.g/Lus10004948.g/Lus10024034.g/Lus10033394.g/Lus10031048.g/Lus10022085.g/Lus10017470.g/Lus10041543.g/Lus10037334.g/Lus10017249.g	12
GO:0043177	MF	organic acid binding	12/2242	162/32470	0.443699	0.878348	0.805502	Lus10020719.g/Lus10012550.g/Lus10004153.g/Lus10004948.g/Lus10024034.g/Lus10033394.g/Lus10031048.g/Lus10022085.g/Lus10017470.g/Lus10041543.g/Lus10037334.g/Lus10017249.g	12
GO:0080043	MF	quercetin 3-O-glucosyltransferase activity	12/2242	162/32470	0.443699	0.878348	0.805502	Lus10024583.g/scaffold1247.34/Lus10042262.g/scaffold274.9/Lus10039277.g/Lus10014437.g/Lus10019833.g/Lus10042261.g/Lus10013500.g/Lus10019808.g/Lus10014105.g/Lus10023939.g	12
GO:0080044	MF	quercetin 7-O-glucosyltransferase activity	12/2242	162/32470	0.443699	0.878348	0.805502	Lus10024583.g/scaffold1247.34/Lus10042262.g/scaffold274.9/Lus10039277.g/Lus10014437.g/Lus10019833.g/Lus10042261.g/Lus10013500.g/Lus10019808.g/Lus10014105.g/Lus10023939.g	12
GO:0044270	BP	cellular nitrogen compound catabolic process	16/2242	219/32470	0.444792	0.879984	0.807003	Lus10024484.g/Lus10016369.g/Lus10019755.g/scaffold251.59/Lus10036993.g/Lus10041348.g/Lus10014765.g/Lus10039372.g/Lus10029160.g/Lus10037370.g/Lus10034306.g/Lus10029713.g/Lus10019822.g/Lus10014091.g/Lus10023619.g/Lus10014092.g	16
GO:0065004	BP	protein-DNA complex assembly	9/2242	120/32470	0.448726	0.887235	0.813653	Lus10025968.g/Lus10014267.g/Lus10037630.g/Lus10011470.g/Lus10021585.g/Lus10023105.g/Lus10004462.g/Lus10025203.g/Lus10012092.g	9
GO:0046700	BP	heterocycle catabolic process	16/2242	220/32470	0.452142	0.888756	0.815047	Lus10024484.g/Lus10016369.g/Lus10019755.g/scaffold251.59/Lus10041348.g/Lus10039372.g/Lus10034095.g/Lus10034094.g/Lus10029160.g/Lus10037370.g/Lus10034306.g/Lus10029713.g/Lus10019822.g/Lus10014091.g/Lus10023619.g/Lus10014092.g	16
GO:0051338	BP	regulation of transferase activity	7/2242	92/32470	0.452162	0.888756	0.815047	Lus10021940.g/Lus10022265.g/Lus10001137.g/Lus10002356.g/Lus10003149.g/Lus10042873.g/Lus10007022.g	7
GO:0000323	CC	lytic vacuole	6/2242	78/32470	0.453836	0.888756	0.815047	Lus10037951.g/Lus10024303.g/Lus10034895.g/Lus10028797.g/Lus10006130.g/Lus10037826.g	6
GO:0004568	MF	chitinase activity	6/2242	78/32470	0.453836	0.888756	0.815047	Lus10010866.g/Lus10000193.g/Lus10019061.g/Lus10024366.g/Lus10040020.g/Lus10032626.g	6
GO:0016893	MF	endonuclease activity, active with either ribo- or deoxyribonucleic acids and producing 5'-phosphomonoesters	6/2242	78/32470	0.453836	0.888756	0.815047	scaffold1999.8/Lus10000951.g/Lus10026483.g/Lus10021917.g/Lus10019588.g/Lus10004462.g	6
GO:0031667	BP	response to nutrient levels	6/2242	78/32470	0.453836	0.888756	0.815047	Lus10036618.g/Lus10037032.g/Lus10001862.g/Lus10019415.g/Lus10037672.g/Lus10035801.g	6
GO:0004805	MF	trehalose-phosphatase activity	2/2242	22/32470	0.454749	0.888756	0.815047	Lus10005559.g/Lus10012990.g	2
GO:0005655	CC	nucleolar ribonuclease P complex	2/2242	22/32470	0.454749	0.888756	0.815047	Lus10000951.g/Lus10021917.g	2
GO:0009378	MF	four-way junction helicase activity	2/2242	22/32470	0.454749	0.888756	0.815047	Lus10028385.g/Lus10034749.g	2
GO:0010143	BP	cutin biosynthetic process	2/2242	22/32470	0.454749	0.888756	0.815047	Lus10002500.g/Lus10031396.g	2
GO:0016036	BP	cellular response to phosphate starvation	2/2242	22/32470	0.454749	0.888756	0.815047	Lus10037032.g/Lus10019415.g	2
GO:0016778	MF	diphosphotransferase activity	2/2242	22/32470	0.454749	0.888756	0.815047	Lus10001862.g/Lus10037672.g	2
GO:0030681	CC	multimeric ribonuclease P complex	2/2242	22/32470	0.454749	0.888756	0.815047	Lus10000951.g/Lus10021917.g	2
GO:0031965	CC	nuclear membrane	2/2242	22/32470	0.454749	0.888756	0.815047	Lus10005933.g/scaffold177.112	2
GO:0043140	MF	ATP-dependent 3'-5' DNA helicase activity	2/2242	22/32470	0.454749	0.888756	0.815047	Lus10028385.g/Lus10034749.g	2
GO:0061512	BP	protein localization to cilium	2/2242	22/32470	0.454749	0.888756	0.815047	Lus10017359.g/Lus10041757.g	2
GO:0016846	MF	carbon-sulfur lyase activity	5/2242	64/32470	0.455387	0.888756	0.815047	Lus10007021.g/Lus10014765.g/Lus10028695.g/Lus10001640.g/Lus10002943.g	5
GO:0016998	BP	cell wall macromolecule catabolic process	5/2242	64/32470	0.455387	0.888756	0.815047	Lus10037377.g/Lus10010866.g/Lus10000193.g/Lus10007900.g/Lus10024366.g	5
GO:0022603	BP	regulation of anatomical structure morphogenesis	5/2242	64/32470	0.455387	0.888756	0.815047	Lus10008098.g/Lus10007231.g/Lus10037469.g/Lus10011113.g/Lus10037621.g	5
GO:0031300	CC	intrinsic component of organelle membrane	5/2242	64/32470	0.455387	0.888756	0.815047	Lus10029605.g/Lus10016878.g/Lus10042575.g/Lus10022034.g/Lus10003945.g	5
GO:0045859	BP	regulation of protein kinase activity	5/2242	64/32470	0.455387	0.888756	0.815047	Lus10021940.g/Lus10022265.g/Lus10001137.g/Lus10042873.g/Lus10007022.g	5
GO:0048523	BP	negative regulation of cellular process	27/2242	378/32470	0.456182	0.888756	0.815047	Lus10042731.g/Lus10005134.g/scaffold732.45/scaffold370.2/Lus10021767.g/Lus10012202.g/Lus10008007.g/Lus10019348.g/Lus10007849.g/Lus10021940.g/Lus10011929.g/Lus10009351.g/Lus10039911.g/Lus10004759.g/Lus10001012.g/Lus10033472.g/Lus10043200.g/Lus10019636.g/Lus10027639.g/Lus10017724.g/Lus10008129.g/Lus10024485.g/Lus10021650.g/Lus10013166.g/Lus10027648.g/Lus10041718.g/Lus10043433.g	27
GO:0016409	MF	palmitoyltransferase activity	4/2242	50/32470	0.456625	0.888756	0.815047	Lus10040971.g/Lus10016754.g/Lus10033823.g/Lus10040833.g	4
GO:0031329	BP	regulation of cellular catabolic process	4/2242	50/32470	0.456625	0.888756	0.815047	Lus10035332.g/Lus10024093.g/Lus10023619.g/Lus10026104.g	4
GO:0008320	MF	protein transmembrane transporter activity	3/2242	36/32470	0.457036	0.888756	0.815047	Lus10007878.g/Lus10016878.g/Lus10013127.g	3
GO:0019206	MF	nucleoside kinase activity	3/2242	36/32470	0.457036	0.888756	0.815047	Lus10009040.g/Lus10009678.g/Lus10023021.g	3
GO:0022884	MF	macromolecule transmembrane transporter activity	3/2242	36/32470	0.457036	0.888756	0.815047	Lus10007878.g/Lus10016878.g/Lus10013127.g	3
GO:0055072	BP	iron ion homeostasis	3/2242	36/32470	0.457036	0.888756	0.815047	Lus10035730.g/Lus10007231.g/Lus10002865.g	3
GO:1901575	BP	organic substance catabolic process	126/2242	1804/32470	0.459533	0.893085	0.819018	Lus10024484.g/Lus10004396.g/Lus10037951.g/Lus10033976.g/Lus10012804.g/Lus10016369.g/Lus10024599.g/Lus10023698.g/Lus10014658.g/Lus10019755.g/Lus10023699.g/Lus10028135.g/Lus10041000.g/Lus10041003.g/C8303341.1/Lus10039994.g/Lus10020908.g/Lus10028700.g/Lus10026054.g/Lus10034595.g/Lus10042839.g/Lus10033706.g/Lus10018491.g/Lus10022706.g/Lus10035041.g/Lus10015715.g/Lus10024303.g/Lus10034895.g/Lus1000619…	126
GO:0006644	BP	phospholipid metabolic process	18/2242	250/32470	0.462146	0.896713	0.822344	Lus10000692.g/Lus10033706.g/Lus10019671.g/Lus10031634.g/Lus10029873.g/Lus10035175.g/Lus10012556.g/Lus10020672.g/Lus10037446.g/Lus10002356.g/Lus10003149.g/Lus10007662.g/Lus10002582.g/Lus10026322.g/Lus10022074.g/Lus10015456.g/Lus10011337.g/Lus10035633.g	18
GO:0004185	MF	serine-type carboxypeptidase activity	7/2242	93/32470	0.463527	0.896713	0.822344	Lus10007731.g/Lus10041000.g/Lus10018667.g/Lus10011603.g/Lus10041817.g/Lus10039582.g/scaffold280.36	7
GO:0098542	BP	defense response to other organism	17/2242	236/32470	0.464429	0.896713	0.822344	Lus10003660.g/Lus10004289.g/Lus10007633.g/Lus10003398.g/Lus10003265.g/Lus10041348.g/Lus10022265.g/Lus10023302.g/Lus10001137.g/Lus10037370.g/Lus10027477.g/Lus10037136.g/Lus10019227.g/Lus10006778.g/Lus10006552.g/Lus10008964.g/Lus10010133.g	17
GO:0003678	MF	DNA helicase activity	6/2242	79/32470	0.466186	0.896713	0.822344	Lus10005783.g/Lus10028385.g/Lus10006818.g/Lus10034749.g/Lus10016644.g/Lus10015868.g	6
GO:0140013	BP	meiotic nuclear division	6/2242	79/32470	0.466186	0.896713	0.822344	Lus10041143.g/Lus10010242.g/Lus10016644.g/Lus10036517.g/Lus10017724.g/Lus10039383.g	6
GO:0004402	MF	histone acetyltransferase activity	5/2242	65/32470	0.469029	0.896713	0.822344	Lus10010733.g/Lus10018680.g/Lus10036678.g/Lus10001102.g/Lus10025246.g	5
GO:0042594	BP	response to starvation	5/2242	65/32470	0.469029	0.896713	0.822344	Lus10036618.g/Lus10037032.g/Lus10001862.g/Lus10019415.g/Lus10037672.g	5
GO:0061733	MF	peptide-lysine-N-acetyltransferase activity	5/2242	65/32470	0.469029	0.896713	0.822344	Lus10010733.g/Lus10018680.g/Lus10036678.g/Lus10001102.g/Lus10025246.g	5
GO:0009814	BP	defense response, incompatible interaction	4/2242	51/32470	0.47207	0.896713	0.822344	Lus10041348.g/Lus10022265.g/Lus10001137.g/Lus10037370.g	4
GO:0035194	BP	posttranscriptional gene silencing by RNA	4/2242	51/32470	0.47207	0.896713	0.822344	Lus10001012.g/Lus10037136.g/Lus10019588.g/Lus10027113.g	4
GO:0070647	BP	protein modification by small protein conjugation or removal	32/2242	453/32470	0.473153	0.896713	0.822344	Lus10017257.g/Lus10030599.g/Lus10025885.g/Lus10009739.g/Lus10005220.g/Lus10033243.g/Lus10035332.g/Lus10003792.g/Lus10019908.g/Lus10024093.g/Lus10013235.g/Lus10006638.g/Lus10030597.g/Lus10036739.g/Lus10041378.g/Lus10030891.g/Lus10005193.g/Lus10000513.g/Lus10030755.g/scaffold127.46/Lus10039197.g/Lus10039470.g/Lus10038982.g/Lus10003698.g/Lus10026104.g/Lus10013745.g/Lus10025715.g/Lus10021683.g/Lus100…	32
GO:0042623	MF	ATPase activity, coupled	49/2242	698/32470	0.47343	0.896713	0.822344	Lus10027725.g/Lus10015994.g/Lus10018027.g/Lus10028810.g/Lus10026946.g/Lus10005783.g/Lus10012959.g/Lus10007872.g/Lus10033386.g/Lus10024965.g/Lus10042040.g/Lus10015993.g/Lus10028385.g/Lus10009789.g/Lus10006818.g/Lus10022858.g/Lus10034840.g/Lus10032133.g/Lus10027727.g/Lus10026944.g/Lus10038681.g/Lus10034749.g/Lus10010623.g/Lus10037947.g/Lus10033637.g/Lus10033179.g/Lus10027567.g/Lus10033934.g/Lus1001…	49
GO:0004367	MF	glycerol-3-phosphate dehydrogenase [NAD+] activity	1/2242	9/32470	0.47482	0.896713	0.822344	scaffold261.42	1
GO:0004619	MF	phosphoglycerate mutase activity	1/2242	9/32470	0.47482	0.896713	0.822344	Lus10031877.g	1
GO:0005313	MF	L-glutamate transmembrane transporter activity	1/2242	9/32470	0.47482	0.896713	0.822344	Lus10018692.g	1
GO:0006566	BP	threonine metabolic process	1/2242	9/32470	0.47482	0.896713	0.822344	Lus10014658.g	1
GO:0007007	BP	inner mitochondrial membrane organization	1/2242	9/32470	0.47482	0.896713	0.822344	Lus10016516.g	1
GO:0008940	MF	nitrate reductase activity	1/2242	9/32470	0.47482	0.896713	0.822344	Lus10005992.g	1
GO:0009263	BP	deoxyribonucleotide biosynthetic process	1/2242	9/32470	0.47482	0.896713	0.822344	Lus10018867.g	1
GO:0009616	BP	virus induced gene silencing	1/2242	9/32470	0.47482	0.896713	0.822344	Lus10037136.g	1
GO:0010025	BP	wax biosynthetic process	1/2242	9/32470	0.47482	0.896713	0.822344	Lus10028171.g	1
GO:0010166	BP	wax metabolic process	1/2242	9/32470	0.47482	0.896713	0.822344	Lus10028171.g	1
GO:0010204	BP	defense response signaling pathway, resistance gene-independent	1/2242	9/32470	0.47482	0.896713	0.822344	Lus10023302.g	1
GO:0015172	MF	acidic amino acid transmembrane transporter activity	1/2242	9/32470	0.47482	0.896713	0.822344	Lus10018692.g	1
GO:0015868	BP	purine ribonucleotide transport	1/2242	9/32470	0.47482	0.896713	0.822344	Lus10008572.g	1
GO:0015976	BP	carbon utilization	1/2242	9/32470	0.47482	0.896713	0.822344	Lus10015833.g	1
GO:0016559	BP	peroxisome fission	1/2242	9/32470	0.47482	0.896713	0.822344	Lus10003945.g	1
GO:0016801	MF	hydrolase activity, acting on ether bonds	1/2242	9/32470	0.47482	0.896713	0.822344	Lus10040988.g	1
GO:0016888	MF	endodeoxyribonuclease activity, producing 5'-phosphomonoesters	1/2242	9/32470	0.47482	0.896713	0.822344	Lus10004462.g	1
GO:0032786	BP	positive regulation of DNA-templated transcription, elongation	1/2242	9/32470	0.47482	0.896713	0.822344	Lus10017289.g	1
GO:0033765	MF	steroid dehydrogenase activity, acting on the CH-CH group of donors	1/2242	9/32470	0.47482	0.896713	0.822344	Lus10032854.g	1
GO:0035336	BP	long-chain fatty-acyl-CoA metabolic process	1/2242	9/32470	0.47482	0.896713	0.822344	Lus10029336.g	1
GO:0042454	BP	ribonucleoside catabolic process	1/2242	9/32470	0.47482	0.896713	0.822344	scaffold251.59	1
GO:0043069	BP	negative regulation of programmed cell death	1/2242	9/32470	0.47482	0.896713	0.822344	Lus10021940.g	1
GO:0043682	MF	copper-transporting ATPase activity	1/2242	9/32470	0.47482	0.896713	0.822344	Lus10009789.g	1
GO:0043967	BP	histone H4 acetylation	1/2242	9/32470	0.47482	0.896713	0.822344	Lus10021650.g	1
GO:0045543	MF	gibberellin 2-beta-dioxygenase activity	1/2242	9/32470	0.47482	0.896713	0.822344	Lus10006759.g	1
GO:0046083	BP	adenine metabolic process	1/2242	9/32470	0.47482	0.896713	0.822344	Lus10001497.g	1
GO:0046084	BP	adenine biosynthetic process	1/2242	9/32470	0.47482	0.896713	0.822344	Lus10001497.g	1
GO:0046168	BP	glycerol-3-phosphate catabolic process	1/2242	9/32470	0.47482	0.896713	0.822344	scaffold261.42	1
GO:0048256	MF	flap endonuclease activity	1/2242	9/32470	0.47482	0.896713	0.822344	Lus10004462.g	1
GO:0051348	BP	negative regulation of transferase activity	1/2242	9/32470	0.47482	0.896713	0.822344	Lus10021940.g	1
GO:0051503	BP	adenine nucleotide transport	1/2242	9/32470	0.47482	0.896713	0.822344	Lus10008572.g	1
GO:0052018	BP	modulation by symbiont of RNA levels in host	1/2242	9/32470	0.47482	0.896713	0.822344	Lus10037136.g	1
GO:0052249	BP	modulation of RNA levels in other organism involved in symbiotic interaction	1/2242	9/32470	0.47482	0.896713	0.822344	Lus10037136.g	1
GO:0052691	MF	UDP-arabinopyranose mutase activity	1/2242	9/32470	0.47482	0.896713	0.822344	Lus10034664.g	1
GO:0080022	BP	primary root development	1/2242	9/32470	0.47482	0.896713	0.822344	Lus10035801.g	1
GO:0090333	BP	regulation of stomatal closure	1/2242	9/32470	0.47482	0.896713	0.822344	Lus10035765.g	1
GO:0008135	MF	translation factor activity, RNA binding	21/2242	295/32470	0.474953	0.896713	0.822344	Lus10039078.g/Lus10036873.g/Lus10038781.g/Lus10002264.g/Lus10006224.g/Lus10000920.g/Lus10021532.g/Lus10015124.g/Lus10030422.g/Lus10033806.g/Lus10027295.g/Lus10011938.g/Lus10007763.g/Lus10037136.g/Lus10039660.g/Lus10034314.g/Lus10005100.g/Lus10015293.g/Lus10026637.g/Lus10017289.g/Lus10014386.g	21
GO:0008287	CC	protein serine/threonine phosphatase complex	3/2242	37/32470	0.475258	0.896713	0.822344	Lus10036926.g/Lus10008757.g/Lus10037057.g	3
GO:1903293	CC	phosphatase complex	3/2242	37/32470	0.475258	0.896713	0.822344	Lus10036926.g/Lus10008757.g/Lus10037057.g	3
GO:0006549	BP	isoleucine metabolic process	2/2242	23/32470	0.478104	0.898999	0.82444	Lus10029955.g/scaffold464.140	2
GO:0009097	BP	isoleucine biosynthetic process	2/2242	23/32470	0.478104	0.898999	0.82444	Lus10029955.g/scaffold464.140	2
GO:0016032	BP	viral process	2/2242	23/32470	0.478104	0.898999	0.82444	Lus10030942.g/Lus10040105.g	2
GO:0031418	MF	L-ascorbic acid binding	2/2242	23/32470	0.478104	0.898999	0.82444	Lus10031048.g/Lus10017249.g	2
GO:0040011	BP	locomotion	2/2242	23/32470	0.478104	0.898999	0.82444	Lus10029873.g/Lus10020672.g	2
GO:0050593	MF	N-methylcoclaurine 3'-monooxygenase activity	2/2242	23/32470	0.478104	0.898999	0.82444	Lus10027425.g/Lus10036079.g	2
GO:0019439	BP	aromatic compound catabolic process	19/2242	267/32470	0.480069	0.90218	0.827358	Lus10024484.g/Lus10016369.g/Lus10019755.g/Lus10028135.g/Lus10042839.g/scaffold251.59/Lus10041348.g/Lus10039372.g/Lus10032689.g/Lus10029160.g/Lus10037370.g/Lus10034306.g/Lus10029713.g/Lus10019822.g/Lus10008571.g/Lus10028263.g/Lus10014091.g/Lus10023619.g/Lus10014092.g	19
GO:0044801	BP	membrane fusion	8/2242	109/32470	0.482065	0.905415	0.830324	Lus10040213.g/Lus10018296.g/Lus10017686.g/Lus10037826.g/Lus10016516.g/Lus10000311.g/Lus10011737.g/Lus10040349.g	8
GO:0051536	MF	iron-sulfur cluster binding	13/2242	181/32470	0.482916	0.905982	0.830845	Lus10026246.g/Lus10041348.g/Lus10042424.g/Lus10032689.g/Lus10037370.g/Lus10034306.g/Lus10043430.g/Lus10006989.g/Lus10008571.g/Lus10001102.g/Lus10031561.g/Lus10034144.g/Lus10025575.g	13
GO:0051540	MF	metal cluster binding	13/2242	181/32470	0.482916	0.905982	0.830845	Lus10026246.g/Lus10041348.g/Lus10042424.g/Lus10032689.g/Lus10037370.g/Lus10034306.g/Lus10043430.g/Lus10006989.g/Lus10008571.g/Lus10001102.g/Lus10031561.g/Lus10034144.g/Lus10025575.g	13
GO:0072330	BP	monocarboxylic acid biosynthetic process	20/2242	282/32470	0.48397	0.907443	0.832185	Lus10039278.g/Lus10002191.g/Lus10006058.g/Lus10027515.g/Lus10018594.g/Lus10028171.g/Lus10040739.g/Lus10015222.g/Lus10039401.g/Lus10000672.g/Lus10010505.g/Lus10001657.g/Lus10006637.g/Lus10019510.g/Lus10016354.g/scaffold156.218/Lus10039906.g/Lus10031809.g/Lus10031236.g/Lus10018986.g	20
GO:0015035	MF	protein disulfide oxidoreductase activity	10/2242	138/32470	0.484475	0.907875	0.832581	Lus10003194.g/Lus10026878.g/Lus10003437.g/Lus10034196.g/Lus10042104.g/Lus10012909.g/Lus10001237.g/Lus10024982.g/Lus10019847.g/Lus10036698.g	10
GO:0016627	MF	oxidoreductase activity, acting on the CH-CH group of donors	45/2242	643/32470	0.484951	0.908251	0.832925	Lus10010989.g/Lus10029966.g/Lus10008951.g/Lus10002936.g/Lus10023418.g/Lus10034662.g/Lus10020908.g/Lus10035354.g/Lus10032854.g/Lus10011288.g/Lus10035481.g/Lus10029970.g/Lus10017871.g/Lus10007983.g/Lus10027404.g/Lus10004574.g/Lus10007832.g/Lus10035332.g/Lus10002319.g/Lus10005103.g/Lus10010534.g/Lus10024038.g/Lus10027567.g/Lus10009394.g/Lus10000484.g/Lus10004575.g/Lus10008828.g/Lus10042078.g/Lus1002…	45
GO:0019867	CC	outer membrane	7/2242	95/32470	0.486085	0.909643	0.834202	Lus10025846.g/Lus10038254.g/Lus10000651.g/Lus10036973.g/Lus10042575.g/Lus10022034.g/Lus10031863.g	7
GO:0006354	BP	DNA-templated transcription, elongation	4/2242	52/32470	0.487348	0.909643	0.834202	Lus10027295.g/Lus10001102.g/Lus10033586.g/Lus10017289.g	4
GO:0009081	BP	branched-chain amino acid metabolic process	4/2242	52/32470	0.487348	0.909643	0.834202	scaffold338.16/Lus10007247.g/Lus10029955.g/scaffold464.140	4
GO:0016759	MF	cellulose synthase activity	4/2242	52/32470	0.487348	0.909643	0.834202	Lus10032415.g/Lus10023057.g/Lus10023056.g/Lus10039607.g	4
GO:0016760	MF	cellulose synthase (UDP-forming) activity	4/2242	52/32470	0.487348	0.909643	0.834202	Lus10032415.g/Lus10023057.g/Lus10023056.g/Lus10039607.g	4
GO:0061077	BP	chaperone-mediated protein folding	4/2242	52/32470	0.487348	0.909643	0.834202	Lus10009941.g/Lus10016586.g/Lus10002356.g/Lus10003149.g	4
GO:1901361	BP	organic cyclic compound catabolic process	20/2242	283/32470	0.490473	0.914768	0.838902	Lus10024484.g/Lus10016369.g/Lus10019755.g/Lus10028135.g/Lus10042839.g/scaffold251.59/Lus10024927.g/Lus10041348.g/Lus10039372.g/Lus10034095.g/Lus10034094.g/Lus10029160.g/Lus10037370.g/Lus10034306.g/Lus10029713.g/Lus10019822.g/Lus10028263.g/Lus10014091.g/Lus10023619.g/Lus10014092.g	20
GO:0033218	MF	amide binding	6/2242	81/32470	0.490648	0.914768	0.838902	Lus10024034.g/Lus10022763.g/Lus10003146.g/scaffold177.112/Lus10040614.g/Lus10018986.g	6
GO:0001047	MF	core promoter binding	3/2242	38/32470	0.493191	0.917952	0.841822	Lus10031826.g/Lus10028005.g/Lus10025599.g	3
GO:0001934	BP	positive regulation of protein phosphorylation	3/2242	38/32470	0.493191	0.917952	0.841822	Lus10022265.g/Lus10001137.g/Lus10007022.g	3
GO:1904680	MF	peptide transmembrane transporter activity	3/2242	38/32470	0.493191	0.917952	0.841822	Lus10007878.g/Lus10016878.g/Lus10013127.g	3
GO:0022838	MF	substrate-specific channel activity	14/2242	197/32470	0.495414	0.918631	0.842444	Lus10040652.g/Lus10038148.g/Lus10005221.g/Lus10037895.g/Lus10018594.g/Lus10035281.g/Lus10019442.g/Lus10004153.g/Lus10024477.g/Lus10031320.g/Lus10031891.g/Lus10037904.g/Lus10000913.g/Lus10043298.g	14
GO:0001932	BP	regulation of protein phosphorylation	5/2242	67/32470	0.495974	0.918631	0.842444	Lus10021940.g/Lus10022265.g/Lus10001137.g/Lus10042873.g/Lus10007022.g	5
GO:0006749	BP	glutathione metabolic process	5/2242	67/32470	0.495974	0.918631	0.842444	Lus10026643.g/Lus10030414.g/Lus10015049.g/Lus10007897.g/Lus10042756.g	5
GO:0034212	MF	peptide N-acetyltransferase activity	7/2242	96/32470	0.497262	0.918631	0.842444	Lus10010733.g/Lus10021995.g/Lus10018680.g/Lus10036678.g/Lus10042534.g/Lus10001102.g/Lus10025246.g	7
GO:0009853	BP	photorespiration	2/2242	24/32470	0.500834	0.918631	0.842444	Lus10023302.g/Lus10037552.g	2
GO:0016055	BP	Wnt signaling pathway	2/2242	24/32470	0.500834	0.918631	0.842444	Lus10011113.g/Lus10037621.g	2
GO:0097346	CC	INO80-type complex	2/2242	24/32470	0.500834	0.918631	0.842444	Lus10018907.g/Lus10021650.g	2
GO:0198738	BP	cell-cell signaling by wnt	2/2242	24/32470	0.500834	0.918631	0.842444	Lus10011113.g/Lus10037621.g	2
GO:1905114	BP	cell surface receptor signaling pathway involved in cell-cell signaling	2/2242	24/32470	0.500834	0.918631	0.842444	Lus10011113.g/Lus10037621.g	2
GO:2000280	BP	regulation of root development	2/2242	24/32470	0.500834	0.918631	0.842444	Lus10017223.g/Lus10019636.g	2
GO:0051130	BP	positive regulation of cellular component organization	4/2242	53/32470	0.502442	0.918631	0.842444	Lus10010733.g/Lus10036678.g/Lus10030422.g/Lus10026637.g	4
GO:0009826	BP	unidimensional cell growth	6/2242	82/32470	0.502742	0.918631	0.842444	scaffold272.125/Lus10040415.g/Lus10007849.g/Lus10004759.g/Lus10041794.g/Lus10007459.g	6
GO:0008094	MF	DNA-dependent ATPase activity	8/2242	111/32470	0.502885	0.918631	0.842444	Lus10005783.g/Lus10028385.g/Lus10006818.g/Lus10034749.g/Lus10021585.g/Lus10016644.g/Lus10039383.g/Lus10015868.g	8
GO:0032501	BP	multicellular organismal process	89/2242	1285/32470	0.50424	0.918631	0.842444	Lus10000310.g/Lus10015754.g/Lus10042731.g/Lus10030446.g/Lus10016056.g/scaffold272.125/Lus10027969.g/Lus10011335.g/Lus10021369.g/Lus10041310.g/Lus10020719.g/Lus10005106.g/Lus10041618.g/Lus10008098.g/Lus10017223.g/Lus10000659.g/Lus10006369.g/Lus10028001.g/Lus10017049.g/Lus10002900.g/Lus10040415.g/Lus10035472.g/Lus10022225.g/Lus10002500.g/Lus10031826.g/Lus10007231.g/Lus10029876.g/Lus10026617.g/Lus10…	89
GO:0006869	BP	lipid transport	9/2242	126/32470	0.5078	0.918631	0.842444	Lus10025152.g/Lus10015279.g/scaffold46.47/Lus10042210.g/scaffold903.52/Lus10024201.g/Lus10009911.g/Lus10022238.g/Lus10033406.g	9
GO:0071824	BP	protein-DNA complex subunit organization	9/2242	126/32470	0.5078	0.918631	0.842444	Lus10025968.g/Lus10014267.g/Lus10037630.g/Lus10011470.g/Lus10021585.g/Lus10023105.g/Lus10004462.g/Lus10025203.g/Lus10012092.g	9
GO:0016866	MF	intramolecular transferase activity	7/2242	97/32470	0.508361	0.918631	0.842444	Lus10016441.g/Lus10016440.g/Lus10005619.g/Lus10034595.g/Lus10034664.g/Lus10031877.g/Lus10017868.g	7
GO:0006568	BP	tryptophan metabolic process	3/2242	39/32470	0.510813	0.918631	0.842444	Lus10019822.g/Lus10014091.g/Lus10014092.g	3
GO:0006586	BP	indolalkylamine metabolic process	3/2242	39/32470	0.510813	0.918631	0.842444	Lus10019822.g/Lus10014091.g/Lus10014092.g	3
GO:0033674	BP	positive regulation of kinase activity	3/2242	39/32470	0.510813	0.918631	0.842444	Lus10022265.g/Lus10001137.g/Lus10007022.g	3
GO:0042176	BP	regulation of protein catabolic process	3/2242	39/32470	0.510813	0.918631	0.842444	Lus10035332.g/Lus10024093.g/Lus10026104.g	3
GO:0042537	BP	benzene-containing compound metabolic process	3/2242	39/32470	0.510813	0.918631	0.842444	Lus10019822.g/Lus10014091.g/Lus10014092.g	3
GO:1901699	BP	cellular response to nitrogen compound	3/2242	39/32470	0.510813	0.918631	0.842444	Lus10037136.g/Lus10019588.g/Lus10027113.g	3
GO:0000347	CC	THO complex	1/2242	10/32470	0.511093	0.918631	0.842444	Lus10027113.g	1
GO:0000777	CC	condensed chromosome kinetochore	1/2242	10/32470	0.511093	0.918631	0.842444	Lus10025814.g	1
GO:0000780	CC	condensed nuclear chromosome, centromeric region	1/2242	10/32470	0.511093	0.918631	0.842444	Lus10025814.g	1
GO:0002239	BP	response to oomycetes	1/2242	10/32470	0.511093	0.918631	0.842444	Lus10008964.g	1
GO:0003906	MF	DNA-(apurinic or apyrimidinic site) endonuclease activity	1/2242	10/32470	0.511093	0.918631	0.842444	Lus10025575.g	1
GO:0003913	MF	DNA photolyase activity	1/2242	10/32470	0.511093	0.918631	0.842444	Lus10033499.g	1
GO:0003960	MF	NADPH:quinone reductase activity	1/2242	10/32470	0.511093	0.918631	0.842444	Lus10003495.g	1
GO:0004033	MF	aldo-keto reductase (NADP) activity	1/2242	10/32470	0.511093	0.918631	0.842444	Lus10023701.g	1
GO:0004198	MF	calcium-dependent cysteine-type endopeptidase activity	1/2242	10/32470	0.511093	0.918631	0.842444	Lus10031049.g	1
GO:0005345	MF	purine nucleobase transmembrane transporter activity	1/2242	10/32470	0.511093	0.918631	0.842444	Lus10025246.g	1
GO:0005834	CC	heterotrimeric G-protein complex	1/2242	10/32470	0.511093	0.918631	0.842444	scaffold524.15	1
GO:0006610	BP	ribosomal protein import into nucleus	1/2242	10/32470	0.511093	0.918631	0.842444	scaffold177.112	1
GO:0006863	BP	purine nucleobase transport	1/2242	10/32470	0.511093	0.918631	0.842444	Lus10025246.g	1
GO:0009394	BP	2'-deoxyribonucleotide metabolic process	1/2242	10/32470	0.511093	0.918631	0.842444	Lus10029160.g	1
GO:0009880	BP	embryonic pattern specification	1/2242	10/32470	0.511093	0.918631	0.842444	Lus10004646.g	1
GO:0010389	BP	regulation of G2/M transition of mitotic cell cycle	1/2242	10/32470	0.511093	0.918631	0.842444	Lus10014595.g	1
GO:0010413	BP	glucuronoxylan metabolic process	1/2242	10/32470	0.511093	0.918631	0.842444	Lus10010268.g	1
GO:0010417	BP	glucuronoxylan biosynthetic process	1/2242	10/32470	0.511093	0.918631	0.842444	Lus10010268.g	1
GO:0010449	BP	root meristem growth	1/2242	10/32470	0.511093	0.918631	0.842444	Lus10017223.g	1
GO:0010496	BP	intercellular transport	1/2242	10/32470	0.511093	0.918631	0.842444	Lus10019636.g	1
GO:0015018	MF	galactosylgalactosylxylosylprotein 3-beta-glucuronosyltransferase activity	1/2242	10/32470	0.511093	0.918631	0.842444	Lus10010268.g	1
GO:0015865	BP	purine nucleotide transport	1/2242	10/32470	0.511093	0.918631	0.842444	Lus10008572.g	1
GO:0016106	BP	sesquiterpenoid biosynthetic process	1/2242	10/32470	0.511093	0.918631	0.842444	Lus10016354.g	1
GO:0019692	BP	deoxyribose phosphate metabolic process	1/2242	10/32470	0.511093	0.918631	0.842444	Lus10029160.g	1
GO:0030897	CC	HOPS complex	1/2242	10/32470	0.511093	0.918631	0.842444	Lus10014310.g	1
GO:0032880	BP	regulation of protein localization	1/2242	10/32470	0.511093	0.918631	0.842444	Lus10023228.g	1
GO:0033356	BP	UDP-L-arabinose metabolic process	1/2242	10/32470	0.511093	0.918631	0.842444	Lus10034664.g	1
GO:0034762	BP	regulation of transmembrane transport	1/2242	10/32470	0.511093	0.918631	0.842444	Lus10018594.g	1
GO:0034765	BP	regulation of ion transmembrane transport	1/2242	10/32470	0.511093	0.918631	0.842444	Lus10018594.g	1
GO:0044003	BP	modification by symbiont of host morphology or physiology	1/2242	10/32470	0.511093	0.918631	0.842444	Lus10037136.g	1
GO:0047134	MF	protein-disulfide reductase activity	1/2242	10/32470	0.511093	0.918631	0.842444	Lus10024212.g	1
GO:0048235	BP	pollen sperm cell differentiation	1/2242	10/32470	0.511093	0.918631	0.842444	Lus10031396.g	1
GO:0050826	BP	response to freezing	1/2242	10/32470	0.511093	0.918631	0.842444	Lus10032127.g	1
GO:0070567	MF	cytidylyltransferase activity	1/2242	10/32470	0.511093	0.918631	0.842444	Lus10036229.g	1
GO:0072529	BP	pyrimidine-containing compound catabolic process	1/2242	10/32470	0.511093	0.918631	0.842444	scaffold251.59	1
GO:0080019	MF	fatty-acyl-CoA reductase (alcohol-forming) activity	1/2242	10/32470	0.511093	0.918631	0.842444	Lus10029336.g	1
GO:0080117	BP	secondary growth	1/2242	10/32470	0.511093	0.918631	0.842444	Lus10037032.g	1
GO:0080190	BP	lateral growth	1/2242	10/32470	0.511093	0.918631	0.842444	Lus10037032.g	1
GO:0090332	BP	stomatal closure	1/2242	10/32470	0.511093	0.918631	0.842444	Lus10035765.g	1
GO:1905360	CC	GTPase complex	1/2242	10/32470	0.511093	0.918631	0.842444	scaffold524.15	1
GO:0004866	MF	endopeptidase inhibitor activity	4/2242	54/32470	0.517337	0.927833	0.850884	Lus10014740.g/Lus10032754.g/Lus10002792.g/Lus10005087.g	4
GO:0030414	MF	peptidase inhibitor activity	4/2242	54/32470	0.517337	0.927833	0.850884	Lus10014740.g/Lus10032754.g/Lus10002792.g/Lus10005087.g	4
GO:0061134	MF	peptidase regulator activity	4/2242	54/32470	0.517337	0.927833	0.850884	Lus10014740.g/Lus10032754.g/Lus10002792.g/Lus10005087.g	4
GO:0061135	MF	endopeptidase regulator activity	4/2242	54/32470	0.517337	0.927833	0.850884	Lus10014740.g/Lus10032754.g/Lus10002792.g/Lus10005087.g	4
GO:0007166	BP	cell surface receptor signaling pathway	5/2242	69/32470	0.522386	0.932265	0.854948	Lus10005138.g/Lus10011113.g/Lus10037621.g/Lus10008350.g/Lus10013384.g	5
GO:0016891	MF	endoribonuclease activity, producing 5'-phosphomonoesters	5/2242	69/32470	0.522386	0.932265	0.854948	scaffold1999.8/Lus10000951.g/Lus10026483.g/Lus10021917.g/Lus10019588.g	5
GO:0001054	MF	RNA polymerase I activity	2/2242	25/32470	0.522916	0.932265	0.854948	Lus10013128.g/Lus10040717.g	2
GO:0005736	CC	RNA polymerase I complex	2/2242	25/32470	0.522916	0.932265	0.854948	Lus10013128.g/Lus10040717.g	2
GO:0008235	MF	metalloexopeptidase activity	2/2242	25/32470	0.522916	0.932265	0.854948	Lus10017223.g/Lus10000403.g	2
GO:0010026	BP	trichome differentiation	2/2242	25/32470	0.522916	0.932265	0.854948	Lus10023694.g/Lus10023228.g	2
GO:0015780	BP	nucleotide-sugar transmembrane transport	2/2242	25/32470	0.522916	0.932265	0.854948	Lus10029605.g/Lus10018189.g	2
GO:0016868	MF	intramolecular transferase activity, phosphotransferases	2/2242	25/32470	0.522916	0.932265	0.854948	Lus10034595.g/Lus10031877.g	2
GO:0043424	MF	protein histidine kinase binding	2/2242	25/32470	0.522916	0.932265	0.854948	Lus10037032.g/Lus10037213.g	2
GO:0046470	BP	phosphatidylcholine metabolic process	2/2242	25/32470	0.522916	0.932265	0.854948	Lus10033706.g/Lus10031634.g	2
GO:0046835	BP	carbohydrate phosphorylation	2/2242	25/32470	0.522916	0.932265	0.854948	Lus10037789.g/Lus10016320.g	2
GO:0050661	MF	NADP binding	6/2242	84/32470	0.526609	0.938343	0.860522	Lus10032078.g/Lus10014614.g/Lus10011093.g/scaffold176.57/Lus10032079.g/Lus10009602.g	6
GO:0015416	MF	ATPase-coupled organic phosphonate transmembrane transporter activity	3/2242	40/32470	0.528106	0.938982	0.861108	Lus10027725.g/Lus10027727.g/Lus10033637.g	3
GO:0015604	MF	organic phosphonate transmembrane transporter activity	3/2242	40/32470	0.528106	0.938982	0.861108	Lus10027725.g/Lus10027727.g/Lus10033637.g	3
GO:0048509	BP	regulation of meristem development	3/2242	40/32470	0.528106	0.938982	0.861108	Lus10008098.g/Lus10017223.g/Lus10010633.g	3
GO:1901068	BP	guanosine-containing compound metabolic process	3/2242	40/32470	0.528106	0.938982	0.861108	Lus10001862.g/Lus10037672.g/Lus10022102.g	3
GO:0005694	CC	chromosome	30/2242	435/32470	0.530095	0.939255	0.861358	Lus10025968.g/Lus10005783.g/Lus10034734.g/Lus10041143.g/Lus10028385.g/Lus10006088.g/Lus10006818.g/Lus10034749.g/Lus10010844.g/Lus10010242.g/Lus10025814.g/Lus10014267.g/Lus10023694.g/Lus10027219.g/Lus10033274.g/Lus10002571.g/Lus10011470.g/Lus10023105.g/Lus10016644.g/Lus10018907.g/Lus10011320.g/Lus10036517.g/Lus10023406.g/Lus10017724.g/Lus10029476.g/Lus10021650.g/Lus10025203.g/Lus10005240.g/Lus1001…	30
GO:0006040	BP	amino sugar metabolic process	7/2242	99/32470	0.530297	0.939255	0.861358	Lus10010866.g/Lus10000193.g/Lus10019061.g/scaffold34.66/Lus10024366.g/Lus10040020.g/Lus10032626.g	7
GO:0044272	BP	sulfur compound biosynthetic process	10/2242	143/32470	0.530406	0.939255	0.861358	Lus10026541.g/Lus10014765.g/Lus10009985.g/Lus10040973.g/Lus10038044.g/Lus10021902.g/Lus10035083.g/Lus10015947.g/Lus10015966.g/Lus10004118.g	10
GO:0071103	BP	DNA conformation change	10/2242	143/32470	0.530406	0.939255	0.861358	Lus10025968.g/Lus10005783.g/Lus10028385.g/Lus10006818.g/Lus10034749.g/Lus10014267.g/Lus10037630.g/Lus10025203.g/Lus10012092.g/Lus10015868.g	10
GO:0000287	MF	magnesium ion binding	18/2242	260/32470	0.530467	0.939255	0.861358	Lus10008521.g/Lus10041003.g/Lus10034595.g/Lus10029955.g/Lus10035662.g/Lus10005399.g/Lus10011057.g/Lus10035175.g/Lus10012556.g/Lus10041767.g/Lus10018906.g/Lus10000672.g/Lus10015966.g/Lus10021156.g/Lus10012111.g/Lus10013806.g/Lus10022238.g/Lus10033406.g	18
GO:0000302	BP	response to reactive oxygen species	4/2242	55/32470	0.53202	0.939255	0.861358	Lus10021940.g/Lus10025845.g/Lus10012657.g/scaffold863.77	4
GO:0005982	BP	starch metabolic process	4/2242	55/32470	0.53202	0.939255	0.861358	Lus10012264.g/Lus10023553.g/Lus10034595.g/Lus10040437.g	4
GO:0030176	CC	integral component of endoplasmic reticulum membrane	4/2242	55/32470	0.53202	0.939255	0.861358	Lus10029605.g/Lus10037011.g/Lus10026489.g/Lus10015793.g	4
GO:0031227	CC	intrinsic component of endoplasmic reticulum membrane	4/2242	55/32470	0.53202	0.939255	0.861358	Lus10029605.g/Lus10037011.g/Lus10026489.g/Lus10015793.g	4
GO:0043087	BP	regulation of GTPase activity	4/2242	55/32470	0.53202	0.939255	0.861358	Lus10038582.g/Lus10043078.g/Lus10037882.g/Lus10040349.g	4
GO:0051640	BP	organelle localization	4/2242	55/32470	0.53202	0.939255	0.861358	Lus10016626.g/Lus10022531.g/Lus10017614.g/Lus10033572.g	4
GO:0008047	MF	enzyme activator activity	8/2242	114/32470	0.533606	0.939255	0.861358	Lus10002478.g/Lus10004561.g/Lus10018445.g/Lus10038582.g/Lus10001254.g/Lus10037882.g/Lus10019847.g/Lus10040349.g	8
GO:0000819	BP	sister chromatid segregation	5/2242	70/32470	0.535366	0.939255	0.861358	Lus10007582.g/Lus10012164.g/Lus10026277.g/Lus10042396.g/Lus10029476.g	5
GO:1901136	BP	carbohydrate derivative catabolic process	9/2242	129/32470	0.53663	0.939255	0.861358	scaffold251.59/Lus10010866.g/Lus10000193.g/Lus10029160.g/scaffold261.42/Lus10019061.g/Lus10024366.g/Lus10040020.g/Lus10032626.g	9
GO:0031625	MF	ubiquitin protein ligase binding	6/2242	85/32470	0.538367	0.939255	0.861358	Lus10041679.g/Lus10036739.g/Lus10017089.g/Lus10016898.g/Lus10038982.g/Lus10027282.g	6
GO:0044389	MF	ubiquitin-like protein ligase binding	6/2242	85/32470	0.538367	0.939255	0.861358	Lus10041679.g/Lus10036739.g/Lus10017089.g/Lus10016898.g/Lus10038982.g/Lus10027282.g	6
GO:0006650	BP	glycerophospholipid metabolic process	13/2242	188/32470	0.539001	0.939255	0.861358	Lus10033706.g/Lus10031634.g/Lus10029873.g/Lus10035175.g/Lus10012556.g/Lus10020672.g/Lus10037446.g/Lus10007662.g/Lus10002582.g/Lus10022074.g/Lus10015456.g/Lus10011337.g/Lus10035633.g	13
GO:0008080	MF	N-acetyltransferase activity	10/2242	144/32470	0.53943	0.939255	0.861358	Lus10010733.g/Lus10017165.g/Lus10021995.g/Lus10018680.g/Lus10036678.g/Lus10042534.g/Lus10021564.g/Lus10041016.g/Lus10001102.g/Lus10025246.g	10
GO:0016887	MF	ATPase activity	59/2242	860/32470	0.540542	0.939255	0.861358	Lus10027725.g/Lus10015994.g/Lus10018027.g/Lus10028810.g/Lus10006046.g/Lus10026946.g/Lus10005783.g/Lus10012959.g/Lus10007872.g/Lus10033386.g/Lus10024965.g/Lus10034734.g/Lus10042040.g/Lus10015993.g/Lus10028385.g/Lus10009789.g/Lus10028704.g/Lus10006818.g/Lus10022858.g/Lus10005798.g/Lus10034840.g/Lus10032133.g/Lus10027727.g/Lus10026944.g/Lus10038681.g/Lus10034749.g/Lus10010623.g/Lus10037947.g/Lus1003…	59
GO:1901698	BP	response to nitrogen compound	7/2242	100/32470	0.541121	0.939255	0.861358	Lus10024614.g/Lus10032252.g/Lus10014631.g/Lus10033798.g/Lus10037136.g/Lus10019588.g/Lus10027113.g	7
GO:0000902	BP	cell morphogenesis	11/2242	159/32470	0.54205	0.939255	0.861358	scaffold272.125/Lus10040415.g/Lus10007849.g/Lus10004759.g/Lus10041794.g/Lus10037469.g/Lus10023694.g/Lus10007459.g/Lus10011113.g/Lus10037621.g/Lus10007858.g	11
GO:0004012	MF	phospholipid-translocating ATPase activity	2/2242	26/32470	0.544329	0.939255	0.861358	Lus10022238.g/Lus10033406.g	2
GO:0005929	CC	cilium	2/2242	26/32470	0.544329	0.939255	0.861358	Lus10017359.g/Lus10041757.g	2
GO:0006879	BP	cellular iron ion homeostasis	2/2242	26/32470	0.544329	0.939255	0.861358	Lus10035730.g/Lus10002865.g	2
GO:0009626	BP	plant-type hypersensitive response	2/2242	26/32470	0.544329	0.939255	0.861358	Lus10035832.g/Lus10021940.g	2
GO:0034050	BP	host programmed cell death induced by symbiont	2/2242	26/32470	0.544329	0.939255	0.861358	Lus10035832.g/Lus10021940.g	2
GO:0035670	BP	plant-type ovary development	2/2242	26/32470	0.544329	0.939255	0.861358	Lus10043200.g/Lus10019636.g	2
GO:0048440	BP	carpel development	2/2242	26/32470	0.544329	0.939255	0.861358	Lus10043200.g/Lus10019636.g	2
GO:0048481	BP	plant ovule development	2/2242	26/32470	0.544329	0.939255	0.861358	Lus10043200.g/Lus10019636.g	2
GO:0048582	BP	positive regulation of post-embryonic development	2/2242	26/32470	0.544329	0.939255	0.861358	Lus10043200.g/Lus10027477.g	2
GO:0000060	BP	protein import into nucleus, translocation	1/2242	11/32470	0.544861	0.939255	0.861358	scaffold177.112	1
GO:0000086	BP	G2/M transition of mitotic cell cycle	1/2242	11/32470	0.544861	0.939255	0.861358	Lus10014595.g	1
GO:0000322	CC	storage vacuole	1/2242	11/32470	0.544861	0.939255	0.861358	Lus10024599.g	1
GO:0000326	CC	protein storage vacuole	1/2242	11/32470	0.544861	0.939255	0.861358	Lus10024599.g	1
GO:0003885	MF	D-arabinono-1,4-lactone oxidase activity	1/2242	11/32470	0.544861	0.939255	0.861358	Lus10038620.g	1
GO:0003997	MF	acyl-CoA oxidase activity	1/2242	11/32470	0.544861	0.939255	0.861358	Lus10024038.g	1
GO:0004034	MF	aldose 1-epimerase activity	1/2242	11/32470	0.544861	0.939255	0.861358	Lus10030673.g	1
GO:0004372	MF	glycine hydroxymethyltransferase activity	1/2242	11/32470	0.544861	0.939255	0.861358	Lus10042923.g	1
GO:0008725	MF	DNA-3-methyladenine glycosylase activity	1/2242	11/32470	0.544861	0.939255	0.861358	Lus10041749.g	1
GO:0010089	BP	xylem development	1/2242	11/32470	0.544861	0.939255	0.861358	Lus10024485.g	1
GO:0010563	BP	negative regulation of phosphorus metabolic process	1/2242	11/32470	0.544861	0.939255	0.861358	Lus10021940.g	1
GO:0015175	MF	neutral amino acid transmembrane transporter activity	1/2242	11/32470	0.544861	0.939255	0.861358	Lus10004430.g	1
GO:0017176	MF	phosphatidylinositol N-acetylglucosaminyltransferase activity	1/2242	11/32470	0.544861	0.939255	0.861358	Lus10040447.g	1
GO:0032957	BP	inositol trisphosphate metabolic process	1/2242	11/32470	0.544861	0.939255	0.861358	Lus10035662.g	1
GO:0032988	BP	ribonucleoprotein complex disassembly	1/2242	11/32470	0.544861	0.939255	0.861358	Lus10002251.g	1
GO:0033588	CC	Elongator holoenzyme complex	1/2242	11/32470	0.544861	0.939255	0.861358	Lus10001102.g	1
GO:0035337	BP	fatty-acyl-CoA metabolic process	1/2242	11/32470	0.544861	0.939255	0.861358	Lus10029336.g	1
GO:0045936	BP	negative regulation of phosphate metabolic process	1/2242	11/32470	0.544861	0.939255	0.861358	Lus10021940.g	1
GO:0046857	MF	oxidoreductase activity, acting on other nitrogenous compounds as donors, with NAD or NADP as acceptor	1/2242	11/32470	0.544861	0.939255	0.861358	Lus10005992.g	1
GO:0047325	MF	inositol tetrakisphosphate 1-kinase activity	1/2242	11/32470	0.544861	0.939255	0.861358	Lus10035662.g	1
GO:0047980	MF	hippurate hydrolase activity	1/2242	11/32470	0.544861	0.939255	0.861358	Lus10015388.g	1
GO:0051765	MF	inositol tetrakisphosphate kinase activity	1/2242	11/32470	0.544861	0.939255	0.861358	Lus10035662.g	1
GO:0052725	MF	inositol-1,3,4-trisphosphate 6-kinase activity	1/2242	11/32470	0.544861	0.939255	0.861358	Lus10035662.g	1
GO:0052726	MF	inositol-1,3,4-trisphosphate 5-kinase activity	1/2242	11/32470	0.544861	0.939255	0.861358	Lus10035662.g	1
GO:0052866	MF	phosphatidylinositol phosphate phosphatase activity	1/2242	11/32470	0.544861	0.939255	0.861358	Lus10035993.g	1
GO:0070940	BP	dephosphorylation of RNA polymerase II C-terminal domain	1/2242	11/32470	0.544861	0.939255	0.861358	Lus10036689.g	1
GO:1901570	BP	fatty acid derivative biosynthetic process	1/2242	11/32470	0.544861	0.939255	0.861358	Lus10028171.g	1
GO:1903409	BP	reactive oxygen species biosynthetic process	1/2242	11/32470	0.544861	0.939255	0.861358	Lus10023302.g	1
GO:0000775	CC	chromosome, centromeric region	3/2242	41/32470	0.545052	0.939255	0.861358	Lus10025814.g/Lus10011470.g/Lus10023105.g	3
GO:0009636	BP	response to toxic substance	4/2242	56/32470	0.546477	0.941219	0.863159	Lus10029955.g/Lus10025845.g/Lus10007897.g/Lus10002674.g	4
GO:0008061	MF	chitin binding	5/2242	71/32470	0.548183	0.943171	0.86495	Lus10003265.g/Lus10010866.g/Lus10000193.g/Lus10024366.g/Lus10006552.g	5
GO:0032984	BP	protein-containing complex disassembly	5/2242	71/32470	0.548183	0.943171	0.86495	Lus10012211.g/Lus10025049.g/Lus10030422.g/Lus10026637.g/Lus10002251.g	5
GO:0009991	BP	response to extracellular stimulus	6/2242	86/32470	0.549996	0.945798	0.867359	Lus10036618.g/Lus10037032.g/Lus10001862.g/Lus10019415.g/Lus10037672.g/Lus10035801.g	6
GO:0004871	MF	obsolete signal transducer activity	27/2242	395/32470	0.550516	0.9459	0.867453	Lus10030229.g/Lus10024192.g/Lus10006369.g/Lus10013902.g/Lus10033197.g/Lus10037032.g/Lus10015773.g/Lus10035284.g/Lus10030042.g/Lus10005983.g/Lus10033230.g/Lus10022265.g/Lus10042632.g/Lus10001137.g/Lus10016620.g/Lus10032761.g/Lus10042225.g/Lus10024474.g/Lus10026917.g/Lus10013702.g/Lus10009983.g/Lus10000502.g/Lus10009894.g/Lus10009631.g/Lus10013384.g/scaffold524.15/Lus10040664.g	27
GO:0016628	MF	oxidoreductase activity, acting on the CH-CH group of donors, NAD or NADP as acceptor	38/2242	556/32470	0.550629	0.9459	0.867453	Lus10010989.g/Lus10029966.g/Lus10002936.g/Lus10023418.g/Lus10034662.g/Lus10035354.g/Lus10011288.g/Lus10035481.g/Lus10029970.g/Lus10017871.g/Lus10007983.g/Lus10027404.g/Lus10004574.g/Lus10007832.g/Lus10035332.g/Lus10002319.g/Lus10005103.g/Lus10010534.g/Lus10027567.g/Lus10009394.g/Lus10000484.g/Lus10004575.g/Lus10008828.g/Lus10042078.g/Lus10028303.g/Lus10011498.g/Lus10008939.g/Lus10041748.g/Lus1003…	38
GO:0043207	BP	response to external biotic stimulus	19/2242	278/32470	0.552561	0.948233	0.869591	Lus10003660.g/Lus10004289.g/Lus10007633.g/Lus10003398.g/Lus10003265.g/Lus10041348.g/Lus10022265.g/Lus10023302.g/Lus10001137.g/Lus10037370.g/Lus10041757.g/Lus10027477.g/Lus10037136.g/Lus10019227.g/Lus10006778.g/Lus10006552.g/Lus10008964.g/Lus10006804.g/Lus10010133.g	19
GO:0051707	BP	response to other organism	19/2242	278/32470	0.552561	0.948233	0.869591	Lus10003660.g/Lus10004289.g/Lus10007633.g/Lus10003398.g/Lus10003265.g/Lus10041348.g/Lus10022265.g/Lus10023302.g/Lus10001137.g/Lus10037370.g/Lus10041757.g/Lus10027477.g/Lus10037136.g/Lus10019227.g/Lus10006778.g/Lus10006552.g/Lus10008964.g/Lus10006804.g/Lus10010133.g	19
GO:0008202	BP	steroid metabolic process	8/2242	116/32470	0.553682	0.948676	0.869998	scaffold272.125/Lus10024927.g/Lus10041794.g/Lus10009467.g/Lus10014437.g/Lus10008775.g/Lus10008774.g/Lus10030033.g	8
GO:0031248	CC	protein acetyltransferase complex	8/2242	116/32470	0.553682	0.948676	0.869998	Lus10021995.g/scaffold152.1/Lus10042534.g/Lus10001102.g/Lus10011422.g/Lus10013170.g/Lus10016282.g/Lus10021650.g	8
GO:1902493	CC	acetyltransferase complex	8/2242	116/32470	0.553682	0.948676	0.869998	Lus10021995.g/scaffold152.1/Lus10042534.g/Lus10001102.g/Lus10011422.g/Lus10013170.g/Lus10016282.g/Lus10021650.g	8
GO:0010565	BP	regulation of cellular ketone metabolic process	4/2242	57/32470	0.560698	0.956074	0.876783	Lus10018594.g/Lus10002356.g/Lus10003149.g/Lus10016354.g	4
GO:0016441	BP	posttranscriptional gene silencing	4/2242	57/32470	0.560698	0.956074	0.876783	Lus10001012.g/Lus10037136.g/Lus10019588.g/Lus10027113.g	4
GO:0009163	BP	nucleoside biosynthetic process	5/2242	72/32470	0.560826	0.956074	0.876783	Lus10009040.g/Lus10040973.g/Lus10009678.g/Lus10035083.g/Lus10023021.g	5
GO:1903046	BP	meiotic cell cycle process	6/2242	87/32470	0.561491	0.956074	0.876783	Lus10041143.g/Lus10010242.g/Lus10016644.g/Lus10036517.g/Lus10017724.g/Lus10039383.g	6
GO:0042327	BP	positive regulation of phosphorylation	3/2242	42/32470	0.561638	0.956074	0.876783	Lus10022265.g/Lus10001137.g/Lus10007022.g	3
GO:0045492	BP	xylan biosynthetic process	3/2242	42/32470	0.561638	0.956074	0.876783	Lus10011360.g/Lus10010268.g/Lus10037026.g	3
GO:0048581	BP	negative regulation of post-embryonic development	3/2242	42/32470	0.561638	0.956074	0.876783	Lus10021369.g/Lus10017049.g/Lus10035472.g	3
GO:0009651	BP	response to salt stress	8/2242	117/32470	0.563584	0.956074	0.876783	Lus10013155.g/Lus10000659.g/Lus10028001.g/Lus10005934.g/Lus10043181.g/Lus10018989.g/Lus10014795.g/Lus10033840.g	8
GO:0042180	BP	cellular ketone metabolic process	8/2242	117/32470	0.563584	0.956074	0.876783	Lus10018594.g/Lus10039930.g/Lus10002356.g/Lus10003149.g/Lus10019822.g/Lus10016354.g/Lus10014091.g/Lus10014092.g	8
GO:0004462	MF	lactoylglutathione lyase activity	2/2242	27/32470	0.565061	0.956074	0.876783	Lus10001640.g/Lus10002943.g	2
GO:0004843	MF	thiol-dependent ubiquitin-specific protease activity	2/2242	27/32470	0.565061	0.956074	0.876783	Lus10033243.g/Lus10005193.g	2
GO:0006544	BP	glycine metabolic process	2/2242	27/32470	0.565061	0.956074	0.876783	Lus10014658.g/Lus10042923.g	2
GO:0009629	BP	response to gravity	2/2242	27/32470	0.565061	0.956074	0.876783	Lus10034595.g/Lus10041508.g	2
GO:0009834	BP	plant-type secondary cell wall biogenesis	2/2242	27/32470	0.565061	0.956074	0.876783	Lus10010268.g/Lus10024485.g	2
GO:0016624	MF	oxidoreductase activity, acting on the aldehyde or oxo group of donors, disulfide as acceptor	2/2242	27/32470	0.565061	0.956074	0.876783	Lus10028648.g/Lus10018945.g	2
GO:0017119	CC	Golgi transport complex	2/2242	27/32470	0.565061	0.956074	0.876783	Lus10007231.g/Lus10012049.g	2
GO:0019359	BP	nicotinamide nucleotide biosynthetic process	2/2242	27/32470	0.565061	0.956074	0.876783	Lus10009958.g/Lus10003178.g	2
GO:0019363	BP	pyridine nucleotide biosynthetic process	2/2242	27/32470	0.565061	0.956074	0.876783	Lus10009958.g/Lus10003178.g	2
GO:0032507	BP	maintenance of protein location in cell	2/2242	27/32470	0.565061	0.956074	0.876783	Lus10022763.g/Lus10003146.g	2
GO:0035601	BP	protein deacylation	2/2242	27/32470	0.565061	0.956074	0.876783	Lus10026054.g/Lus10014347.g	2
GO:0045185	BP	maintenance of protein location	2/2242	27/32470	0.565061	0.956074	0.876783	Lus10022763.g/Lus10003146.g	2
GO:0051094	BP	positive regulation of developmental process	2/2242	27/32470	0.565061	0.956074	0.876783	Lus10043200.g/Lus10027477.g	2
GO:0051240	BP	positive regulation of multicellular organismal process	2/2242	27/32470	0.565061	0.956074	0.876783	Lus10043200.g/Lus10027477.g	2
GO:0098732	BP	macromolecule deacylation	2/2242	27/32470	0.565061	0.956074	0.876783	Lus10026054.g/Lus10014347.g	2
GO:0061630	MF	ubiquitin protein ligase activity	15/2242	221/32470	0.565683	0.956074	0.876783	Lus10035332.g/Lus10030117.g/Lus10024093.g/Lus10013235.g/Lus10036739.g/Lus10000513.g/Lus10030755.g/Lus10017089.g/Lus10016898.g/Lus10021125.g/Lus10038982.g/Lus10003698.g/Lus10026104.g/scaffold5045.1/Lus10027282.g	15
GO:0061659	MF	ubiquitin-like protein ligase activity	15/2242	221/32470	0.565683	0.956074	0.876783	Lus10035332.g/Lus10030117.g/Lus10024093.g/Lus10013235.g/Lus10036739.g/Lus10000513.g/Lus10030755.g/Lus10017089.g/Lus10016898.g/Lus10021125.g/Lus10038982.g/Lus10003698.g/Lus10026104.g/scaffold5045.1/Lus10027282.g	15
GO:0016879	MF	ligase activity, forming carbon-nitrogen bonds	10/2242	147/32470	0.566112	0.956074	0.876783	Lus10014407.g/Lus10022077.g/Lus10012211.g/Lus10004694.g/Lus10012536.g/Lus10010505.g/Lus10022078.g/Lus10042001.g/Lus10040261.g/Lus10027853.g	10
GO:0042440	BP	pigment metabolic process	10/2242	147/32470	0.566112	0.956074	0.876783	Lus10024484.g/Lus10016369.g/Lus10019755.g/Lus10002900.g/Lus10041348.g/Lus10039372.g/Lus10002028.g/Lus10035332.g/Lus10037370.g/Lus10001497.g	10
GO:0001883	MF	purine nucleoside binding	29/2242	428/32470	0.569849	0.956151	0.876853	Lus10040044.g/Lus10002407.g/scaffold244.27/Lus10005990.g/scaffold43.21/Lus10030221.g/Lus10019615.g/Lus10038204.g/Lus10037940.g/Lus10042575.g/Lus10025900.g/Lus10043414.g/Lus10014720.g/scaffold86.218/Lus10043181.g/Lus10005299.g/Lus10041702.g/Lus10040423.g/Lus10007434.g/Lus10022034.g/Lus10023073.g/Lus10034170.g/Lus10023430.g/Lus10017891.g/Lus10031559.g/Lus10036456.g/Lus10019502.g/Lus10041127.g/Lus10…	29
GO:0005525	MF	GTP binding	29/2242	428/32470	0.569849	0.956151	0.876853	Lus10040044.g/Lus10002407.g/scaffold244.27/Lus10005990.g/scaffold43.21/Lus10030221.g/Lus10019615.g/Lus10038204.g/Lus10037940.g/Lus10042575.g/Lus10025900.g/Lus10043414.g/Lus10014720.g/scaffold86.218/Lus10043181.g/Lus10005299.g/Lus10041702.g/Lus10040423.g/Lus10007434.g/Lus10022034.g/Lus10023073.g/Lus10034170.g/Lus10023430.g/Lus10017891.g/Lus10031559.g/Lus10036456.g/Lus10019502.g/Lus10041127.g/Lus10…	29
GO:0032550	MF	purine ribonucleoside binding	29/2242	428/32470	0.569849	0.956151	0.876853	Lus10040044.g/Lus10002407.g/scaffold244.27/Lus10005990.g/scaffold43.21/Lus10030221.g/Lus10019615.g/Lus10038204.g/Lus10037940.g/Lus10042575.g/Lus10025900.g/Lus10043414.g/Lus10014720.g/scaffold86.218/Lus10043181.g/Lus10005299.g/Lus10041702.g/Lus10040423.g/Lus10007434.g/Lus10022034.g/Lus10023073.g/Lus10034170.g/Lus10023430.g/Lus10017891.g/Lus10031559.g/Lus10036456.g/Lus10019502.g/Lus10041127.g/Lus10…	29
GO:0000123	CC	histone acetyltransferase complex	6/2242	88/32470	0.572845	0.956151	0.876853	scaffold152.1/Lus10001102.g/Lus10011422.g/Lus10013170.g/Lus10016282.g/Lus10021650.g	6
GO:0016469	CC	proton-transporting two-sector ATPase complex	6/2242	88/32470	0.572845	0.956151	0.876853	Lus10010618.g/Lus10010623.g/Lus10033179.g/Lus10033934.g/Lus10010619.g/Lus10033382.g	6
GO:0006906	BP	vesicle fusion	7/2242	103/32470	0.572946	0.956151	0.876853	Lus10040213.g/Lus10018296.g/Lus10017686.g/Lus10037826.g/Lus10000311.g/Lus10011737.g/Lus10040349.g	7
GO:0043549	BP	regulation of kinase activity	5/2242	73/32470	0.573289	0.956151	0.876853	Lus10021940.g/Lus10022265.g/Lus10001137.g/Lus10042873.g/Lus10007022.g	5
GO:0048438	BP	floral whorl development	5/2242	73/32470	0.573289	0.956151	0.876853	scaffold272.125/Lus10004646.g/Lus10041794.g/Lus10043200.g/Lus10019636.g	5
GO:0009620	BP	response to fungus	8/2242	118/32470	0.573388	0.956151	0.876853	Lus10004289.g/Lus10003265.g/Lus10041757.g/Lus10027477.g/Lus10019227.g/Lus10006778.g/Lus10006552.g/Lus10010133.g	8
GO:0009894	BP	regulation of catabolic process	4/2242	58/32470	0.574673	0.956151	0.876853	Lus10035332.g/Lus10024093.g/Lus10023619.g/Lus10026104.g	4
GO:0016417	MF	S-acyltransferase activity	4/2242	58/32470	0.574673	0.956151	0.876853	Lus10040971.g/Lus10016754.g/Lus10033823.g/Lus10040833.g	4
GO:0043241	BP	protein-containing complex disassembly	4/2242	58/32470	0.574673	0.956151	0.876853	Lus10012211.g/Lus10025049.g/Lus10030422.g/Lus10026637.g	4
GO:0043624	BP	cellular protein complex disassembly	4/2242	58/32470	0.574673	0.956151	0.876853	Lus10012211.g/Lus10025049.g/Lus10030422.g/Lus10026637.g	4
GO:0045944	BP	positive regulation of transcription by RNA polymerase II	4/2242	58/32470	0.574673	0.956151	0.876853	Lus10027404.g/Lus10003119.g/Lus10041126.g/Lus10017289.g	4
GO:0019001	MF	guanyl nucleotide binding	29/2242	429/32470	0.575017	0.956151	0.876853	Lus10040044.g/Lus10002407.g/scaffold244.27/Lus10005990.g/scaffold43.21/Lus10030221.g/Lus10019615.g/Lus10038204.g/Lus10037940.g/Lus10042575.g/Lus10025900.g/Lus10043414.g/Lus10014720.g/scaffold86.218/Lus10043181.g/Lus10005299.g/Lus10041702.g/Lus10040423.g/Lus10007434.g/Lus10022034.g/Lus10023073.g/Lus10034170.g/Lus10023430.g/Lus10017891.g/Lus10031559.g/Lus10036456.g/Lus10019502.g/Lus10041127.g/Lus10…	29
GO:0032561	MF	guanyl ribonucleotide binding	29/2242	429/32470	0.575017	0.956151	0.876853	Lus10040044.g/Lus10002407.g/scaffold244.27/Lus10005990.g/scaffold43.21/Lus10030221.g/Lus10019615.g/Lus10038204.g/Lus10037940.g/Lus10042575.g/Lus10025900.g/Lus10043414.g/Lus10014720.g/scaffold86.218/Lus10043181.g/Lus10005299.g/Lus10041702.g/Lus10040423.g/Lus10007434.g/Lus10022034.g/Lus10023073.g/Lus10034170.g/Lus10023430.g/Lus10017891.g/Lus10031559.g/Lus10036456.g/Lus10019502.g/Lus10041127.g/Lus10…	29
GO:0000710	BP	meiotic mismatch repair	1/2242	12/32470	0.576298	0.956151	0.876853	Lus10017724.g	1
GO:0000730	BP	DNA recombinase assembly	1/2242	12/32470	0.576298	0.956151	0.876853	Lus10021585.g	1
GO:0003984	MF	acetolactate synthase activity	1/2242	12/32470	0.576298	0.956151	0.876853	Lus10029955.g	1
GO:0009773	BP	photosynthetic electron transport in photosystem I	1/2242	12/32470	0.576298	0.956151	0.876853	Lus10011777.g	1
GO:0009956	BP	radial pattern formation	1/2242	12/32470	0.576298	0.956151	0.876853	Lus10004646.g	1
GO:0015205	MF	nucleobase transmembrane transporter activity	1/2242	12/32470	0.576298	0.956151	0.876853	Lus10025246.g	1
GO:0015781	BP	pyrimidine nucleotide-sugar transmembrane transport	1/2242	12/32470	0.576298	0.956151	0.876853	Lus10029605.g	1
GO:0015851	BP	nucleobase transport	1/2242	12/32470	0.576298	0.956151	0.876853	Lus10025246.g	1
GO:0022412	BP	cellular process involved in reproduction in multicellular organism	1/2242	12/32470	0.576298	0.956151	0.876853	Lus10031396.g	1
GO:0031234	CC	extrinsic component of cytoplasmic side of plasma membrane	1/2242	12/32470	0.576298	0.956151	0.876853	scaffold524.15	1
GO:0034243	BP	regulation of transcription elongation from RNA polymerase II promoter	1/2242	12/32470	0.576298	0.956151	0.876853	Lus10017289.g	1
GO:0035493	BP	SNARE complex assembly	1/2242	12/32470	0.576298	0.956151	0.876853	Lus10037826.g	1
GO:0042148	BP	strand invasion	1/2242	12/32470	0.576298	0.956151	0.876853	Lus10021585.g	1
GO:0042538	BP	hyperosmotic salinity response	1/2242	12/32470	0.576298	0.956151	0.876853	Lus10043181.g	1
GO:0048506	BP	regulation of timing of meristematic phase transition	1/2242	12/32470	0.576298	0.956151	0.876853	Lus10010633.g	1
GO:0048510	BP	regulation of timing of transition from vegetative to reproductive phase	1/2242	12/32470	0.576298	0.956151	0.876853	Lus10010633.g	1
GO:0051817	BP	modification of morphology or physiology of other organism involved in symbiotic interaction	1/2242	12/32470	0.576298	0.956151	0.876853	Lus10037136.g	1
GO:0090735	BP	DNA repair complex assembly	1/2242	12/32470	0.576298	0.956151	0.876853	Lus10021585.g	1
GO:1902749	BP	regulation of cell cycle G2/M phase transition	1/2242	12/32470	0.576298	0.956151	0.876853	Lus10014595.g	1
GO:0006213	BP	pyrimidine nucleoside metabolic process	3/2242	43/32470	0.57785	0.956321	0.877009	Lus10009040.g/scaffold251.59/Lus10009678.g	3
GO:0006465	BP	signal peptide processing	3/2242	43/32470	0.57785	0.956321	0.877009	Lus10030080.g/Lus10037011.g/Lus10015793.g	3
GO:0030162	BP	regulation of proteolysis	3/2242	43/32470	0.57785	0.956321	0.877009	Lus10035332.g/Lus10024093.g/Lus10026104.g	3
GO:0046686	BP	response to cadmium ion	3/2242	43/32470	0.57785	0.956321	0.877009	Lus10037630.g/Lus10043103.g/Lus10008964.g	3
GO:0051651	BP	maintenance of location in cell	3/2242	43/32470	0.57785	0.956321	0.877009	Lus10035730.g/Lus10022763.g/Lus10003146.g	3
GO:0070085	BP	glycosylation	10/2242	149/32470	0.583538	0.963496	0.883589	Lus10003113.g/Lus10028572.g/Lus10027959.g/Lus10004779.g/Lus10012822.g/Lus10027185.g/Lus10026489.g/Lus10003576.g/Lus10018878.g/Lus10002079.g	10
GO:0051321	BP	meiotic cell cycle	6/2242	89/32470	0.584051	0.963496	0.883589	Lus10041143.g/Lus10010242.g/Lus10016644.g/Lus10036517.g/Lus10017724.g/Lus10039383.g	6
GO:0048285	BP	organelle fission	12/2242	179/32470	0.584678	0.963496	0.883589	Lus10041143.g/Lus10007582.g/Lus10012164.g/Lus10010242.g/Lus10016644.g/Lus10036517.g/Lus10017724.g/scaffold175.45/Lus10026277.g/Lus10042396.g/Lus10039383.g/Lus10003945.g	12
GO:0005665	CC	RNA polymerase II, core complex	2/2242	28/32470	0.585105	0.963496	0.883589	Lus10013128.g/Lus10023619.g	2
GO:0007267	BP	cell-cell signaling	2/2242	28/32470	0.585105	0.963496	0.883589	Lus10011113.g/Lus10037621.g	2
[truncated: 1,301 more rows]

## Sheet: Z141_vs_NY17_RD_down_common_GO_
ID	GO_Type	Description	GeneRatio	BgRatio	pvalue	p.adjust	qvalue	geneID	Count
GO:0009507	CC	chloroplast	598/2903	1760/32470	1.5489e-204	5.67362e-201	4.59779e-201	Lus10007362.g/Lus10043090.g/Lus10008594.g/Lus10037891.g/scaffold605.84/Lus10042219.g/Lus10023320.g/Lus10023321.g/Lus10038490.g/Lus10020417.g/Lus10027966.g/Lus10015834.g/Lus10040810.g/C8171617.1/Lus10032935.g/Lus10008191.g/Lus10038575.g/scaffold123.321/Lus10037875.g/Lus10001644.g/Lus10020071.g/Lus10001741.g/Lus10020415.g/Lus10040391.g/Lus10038489.g/Lus10020418.g/Lus10039092.g/Lus10038638.g/Lus1001…	598
GO:0009536	CC	plastid	609/2903	1850/32470	2.1751e-200	3.9837e-197	3.22831e-197	Lus10007362.g/Lus10043090.g/Lus10008594.g/Lus10037891.g/scaffold605.84/Lus10042219.g/Lus10023320.g/Lus10023321.g/Lus10038490.g/Lus10020417.g/Lus10027966.g/Lus10015834.g/Lus10040810.g/C8171617.1/Lus10032935.g/Lus10008191.g/Lus10038575.g/scaffold123.321/Lus10037875.g/Lus10001644.g/Lus10020071.g/Lus10001741.g/Lus10020415.g/Lus10040391.g/Lus10038489.g/Lus10020418.g/Lus10039092.g/Lus10038638.g/Lus1001…	609
GO:0044434	CC	chloroplast part	407/2903	956/32470	3.11958e-177	3.80901e-174	3.08674e-174	Lus10007362.g/Lus10043090.g/Lus10008594.g/Lus10037891.g/scaffold605.84/Lus10042219.g/Lus10023320.g/Lus10023321.g/Lus10038490.g/Lus10020417.g/Lus10027966.g/Lus10015834.g/Lus10040810.g/C8171617.1/Lus10032935.g/Lus10008191.g/Lus10038575.g/scaffold123.321/Lus10037875.g/Lus10001644.g/Lus10020071.g/Lus10001741.g/Lus10020415.g/Lus10040391.g/Lus10038489.g/Lus10020418.g/Lus10039092.g/Lus10015831.g/Lus1000…	407
GO:0044435	CC	plastid part	409/2903	971/32470	4.78321e-176	4.38022e-173	3.54964e-173	Lus10007362.g/Lus10043090.g/Lus10008594.g/Lus10037891.g/scaffold605.84/Lus10042219.g/Lus10023320.g/Lus10023321.g/Lus10038490.g/Lus10020417.g/Lus10027966.g/Lus10015834.g/Lus10040810.g/C8171617.1/Lus10032935.g/Lus10008191.g/Lus10038575.g/scaffold123.321/Lus10037875.g/Lus10001644.g/Lus10020071.g/Lus10001741.g/Lus10020415.g/Lus10040391.g/Lus10038489.g/Lus10020418.g/Lus10039092.g/Lus10015831.g/Lus1000…	409
GO:0009579	CC	thylakoid	255/2903	480/32470	2.05152e-138	1.50294e-135	1.21796e-135	Lus10007362.g/Lus10043090.g/Lus10008594.g/Lus10037891.g/scaffold605.84/Lus10042219.g/Lus10023320.g/Lus10023321.g/Lus10038490.g/Lus10020417.g/Lus10027966.g/Lus10015834.g/C8171617.1/Lus10032935.g/Lus10008191.g/Lus10038575.g/scaffold123.321/Lus10037875.g/Lus10041966.g/Lus10001644.g/Lus10020071.g/Lus10001741.g/Lus10020415.g/Lus10040391.g/Lus10038489.g/Lus10020418.g/Lus10015831.g/Lus10006751.g/Lus1000…	255
GO:0009532	CC	plastid stroma	237/2903	503/32470	1.5235e-113	9.30098e-111	7.53733e-111	Lus10007362.g/Lus10008594.g/Lus10042219.g/Lus10023321.g/Lus10038490.g/Lus10020417.g/Lus10027966.g/Lus10015834.g/Lus10032935.g/Lus10008191.g/Lus10038575.g/scaffold123.321/Lus10037875.g/Lus10001644.g/Lus10020071.g/Lus10001741.g/Lus10020415.g/Lus10040391.g/Lus10038489.g/Lus10039092.g/Lus10015831.g/Lus10006751.g/Lus10006416.g/Lus10021663.g/Lus10027421.g/Lus10041138.g/Lus10035512.g/Lus10023509.g/Lus10…	237
GO:0044436	CC	thylakoid part	209/2903	396/32470	1.87772e-112	9.82586e-110	7.96268e-110	Lus10007362.g/Lus10008594.g/Lus10037891.g/Lus10042219.g/Lus10023320.g/Lus10023321.g/Lus10038490.g/Lus10020417.g/Lus10027966.g/Lus10015834.g/Lus10008191.g/Lus10038575.g/scaffold123.321/Lus10037875.g/Lus10041966.g/Lus10001644.g/Lus10020071.g/Lus10001741.g/Lus10020415.g/Lus10040391.g/Lus10038489.g/Lus10020418.g/Lus10015831.g/Lus10006751.g/Lus10006416.g/Lus10021663.g/Lus10025007.g/Lus10020717.g/Lus10…	209
GO:0009570	CC	chloroplast stroma	232/2903	489/32470	6.19911e-112	2.83842e-109	2.3002e-109	Lus10007362.g/Lus10008594.g/Lus10042219.g/Lus10023321.g/Lus10038490.g/Lus10020417.g/Lus10027966.g/Lus10015834.g/Lus10032935.g/Lus10008191.g/Lus10038575.g/scaffold123.321/Lus10037875.g/Lus10001644.g/Lus10020071.g/Lus10001741.g/Lus10020415.g/Lus10040391.g/Lus10038489.g/Lus10039092.g/Lus10015831.g/Lus10006751.g/Lus10006416.g/Lus10021663.g/Lus10027421.g/Lus10041138.g/Lus10035512.g/Lus10023509.g/Lus10…	232
GO:0034357	CC	photosynthetic membrane	197/2903	369/32470	3.38456e-107	1.37751e-104	1.11631e-104	Lus10007362.g/Lus10008594.g/Lus10037891.g/Lus10042219.g/Lus10023320.g/Lus10023321.g/Lus10038490.g/Lus10020417.g/Lus10027966.g/Lus10015834.g/Lus10008191.g/Lus10038575.g/scaffold123.321/Lus10037875.g/Lus10041966.g/Lus10001644.g/Lus10020071.g/Lus10001741.g/Lus10020415.g/Lus10040391.g/Lus10038489.g/Lus10020418.g/Lus10015831.g/Lus10006751.g/Lus10006416.g/Lus10021663.g/Lus10025007.g/Lus10020717.g/Lus10…	197
GO:0015979	BP	photosynthesis	162/2903	254/32470	5.21897e-105	1.91171e-102	1.54921e-102	Lus10007362.g/Lus10008594.g/Lus10042219.g/Lus10023320.g/Lus10023321.g/Lus10038490.g/Lus10020417.g/Lus10027966.g/Lus10015834.g/Lus10008191.g/Lus10038575.g/scaffold123.321/Lus10037875.g/Lus10041966.g/Lus10001644.g/Lus10020071.g/Lus10001741.g/Lus10020415.g/Lus10040391.g/Lus10038489.g/Lus10020418.g/Lus10015831.g/Lus10006751.g/Lus10006416.g/Lus10021663.g/Lus10027421.g/Lus10025007.g/Lus10033558.g/Lus10…	162
GO:0009941	CC	chloroplast envelope	214/2903	455/32470	3.13358e-102	1.04348e-99	8.45617e-100	Lus10007362.g/Lus10043090.g/Lus10008594.g/Lus10042219.g/Lus10023321.g/Lus10038490.g/Lus10020417.g/Lus10027966.g/Lus10015834.g/Lus10040810.g/C8171617.1/Lus10008191.g/Lus10038575.g/scaffold123.321/Lus10037875.g/Lus10001644.g/Lus10001741.g/Lus10020415.g/Lus10040391.g/Lus10038489.g/Lus10039092.g/Lus10015831.g/Lus10006416.g/Lus10021663.g/Lus10035512.g/Lus10023509.g/Lus10013778.g/Lus10030544.g/Lus10039…	214
GO:0009526	CC	plastid envelope	218/2903	476/32470	3.00331e-101	9.1676e-99	7.42924e-99	Lus10007362.g/Lus10043090.g/Lus10008594.g/Lus10042219.g/Lus10023321.g/Lus10038490.g/Lus10020417.g/Lus10027966.g/Lus10015834.g/Lus10040810.g/C8171617.1/Lus10008191.g/Lus10038575.g/scaffold123.321/Lus10037875.g/Lus10001644.g/Lus10001741.g/Lus10020415.g/Lus10040391.g/Lus10038489.g/Lus10039092.g/Lus10015831.g/Lus10006416.g/Lus10021663.g/Lus10035512.g/Lus10023509.g/Lus10013778.g/Lus10030544.g/Lus10039…	218
GO:0009534	CC	chloroplast thylakoid	188/2903	372/32470	9.86188e-97	2.58029e-94	2.09102e-94	Lus10007362.g/Lus10043090.g/Lus10008594.g/Lus10037891.g/scaffold605.84/Lus10042219.g/Lus10023320.g/Lus10023321.g/Lus10038490.g/Lus10020417.g/Lus10027966.g/Lus10015834.g/C8171617.1/Lus10032935.g/Lus10008191.g/Lus10038575.g/scaffold123.321/Lus10037875.g/Lus10001644.g/Lus10020071.g/Lus10001741.g/Lus10020415.g/Lus10040391.g/Lus10038489.g/Lus10020418.g/Lus10015831.g/Lus10006751.g/Lus10006416.g/Lus1002…	188
GO:0031976	CC	plastid thylakoid	188/2903	372/32470	9.86188e-97	2.58029e-94	2.09102e-94	Lus10007362.g/Lus10043090.g/Lus10008594.g/Lus10037891.g/scaffold605.84/Lus10042219.g/Lus10023320.g/Lus10023321.g/Lus10038490.g/Lus10020417.g/Lus10027966.g/Lus10015834.g/C8171617.1/Lus10032935.g/Lus10008191.g/Lus10038575.g/scaffold123.321/Lus10037875.g/Lus10001644.g/Lus10020071.g/Lus10001741.g/Lus10020415.g/Lus10040391.g/Lus10038489.g/Lus10020418.g/Lus10015831.g/Lus10006751.g/Lus10006416.g/Lus1002…	188
GO:0042651	CC	thylakoid membrane	175/2903	342/32470	3.43849e-91	8.39678e-89	6.80458e-89	Lus10007362.g/Lus10008594.g/Lus10037891.g/Lus10042219.g/Lus10023320.g/Lus10023321.g/Lus10038490.g/Lus10020417.g/Lus10027966.g/Lus10015834.g/Lus10008191.g/Lus10038575.g/scaffold123.321/Lus10037875.g/Lus10001644.g/Lus10020071.g/Lus10001741.g/Lus10020415.g/Lus10040391.g/Lus10038489.g/Lus10020418.g/Lus10015831.g/Lus10006751.g/Lus10006416.g/Lus10021663.g/Lus10020717.g/Lus10035512.g/Lus10023509.g/Lus10…	175
GO:0009535	CC	chloroplast thylakoid membrane	154/2903	306/32470	6.35656e-79	1.36965e-76	1.10994e-76	Lus10007362.g/Lus10008594.g/Lus10037891.g/Lus10042219.g/Lus10023320.g/Lus10023321.g/Lus10038490.g/Lus10020417.g/Lus10027966.g/Lus10015834.g/Lus10008191.g/Lus10038575.g/scaffold123.321/Lus10037875.g/Lus10001644.g/Lus10020071.g/Lus10001741.g/Lus10020415.g/Lus10040391.g/Lus10038489.g/Lus10020418.g/Lus10015831.g/Lus10006751.g/Lus10006416.g/Lus10021663.g/Lus10020717.g/Lus10035512.g/Lus10023509.g/Lus10…	154
GO:0055035	CC	plastid thylakoid membrane	154/2903	306/32470	6.35656e-79	1.36965e-76	1.10994e-76	Lus10007362.g/Lus10008594.g/Lus10037891.g/Lus10042219.g/Lus10023320.g/Lus10023321.g/Lus10038490.g/Lus10020417.g/Lus10027966.g/Lus10015834.g/Lus10008191.g/Lus10038575.g/scaffold123.321/Lus10037875.g/Lus10001644.g/Lus10020071.g/Lus10001741.g/Lus10020415.g/Lus10040391.g/Lus10038489.g/Lus10020418.g/Lus10015831.g/Lus10006751.g/Lus10006416.g/Lus10021663.g/Lus10020717.g/Lus10035512.g/Lus10023509.g/Lus10…	154
GO:0009521	CC	photosystem	100/2903	131/32470	1.94707e-77	3.96229e-75	3.21096e-75	Lus10007362.g/Lus10008594.g/Lus10042219.g/Lus10023320.g/Lus10023321.g/Lus10038490.g/Lus10020417.g/Lus10027966.g/Lus10015834.g/Lus10008191.g/Lus10038575.g/scaffold123.321/Lus10037875.g/Lus10041966.g/Lus10001644.g/Lus10020071.g/Lus10001741.g/Lus10020415.g/Lus10040391.g/Lus10038489.g/Lus10015831.g/Lus10006751.g/Lus10006416.g/Lus10021663.g/Lus10025007.g/Lus10020717.g/Lus10035512.g/Lus10023509.g/Lus10…	100
GO:0019684	BP	photosynthesis, light reaction	85/2903	126/32470	1.49111e-58	2.8747e-56	2.3296e-56	Lus10007362.g/Lus10008594.g/Lus10042219.g/Lus10023320.g/Lus10023321.g/Lus10038490.g/Lus10020417.g/Lus10027966.g/Lus10015834.g/Lus10008191.g/Lus10038575.g/scaffold123.321/Lus10037875.g/Lus10001644.g/Lus10001741.g/Lus10020415.g/Lus10040391.g/Lus10038489.g/Lus10020418.g/Lus10015831.g/Lus10006416.g/Lus10021663.g/Lus10027421.g/Lus10035512.g/Lus10023509.g/C8309561.1/Lus10013778.g/Lus10039156.g/Lus10021…	85
GO:0031967	CC	organelle envelope	231/2903	871/32470	1.43621e-53	2.63041e-51	2.13163e-51	Lus10007362.g/Lus10043090.g/Lus10008594.g/Lus10042219.g/Lus10023321.g/Lus10038490.g/Lus10020417.g/Lus10027966.g/Lus10015834.g/Lus10040810.g/C8171617.1/Lus10008191.g/Lus10038575.g/scaffold123.321/Lus10037875.g/Lus10001644.g/Lus10001741.g/Lus10020415.g/Lus10040391.g/Lus10038489.g/Lus10039092.g/Lus10015831.g/Lus10006416.g/Lus10021663.g/Lus10035512.g/Lus10023509.g/Lus10013778.g/Lus10030544.g/Lus10039…	231
GO:0031975	CC	envelope	231/2903	874/32470	2.77492e-53	4.84025e-51	3.92244e-51	Lus10007362.g/Lus10043090.g/Lus10008594.g/Lus10042219.g/Lus10023321.g/Lus10038490.g/Lus10020417.g/Lus10027966.g/Lus10015834.g/Lus10040810.g/C8171617.1/Lus10008191.g/Lus10038575.g/scaffold123.321/Lus10037875.g/Lus10001644.g/Lus10001741.g/Lus10020415.g/Lus10040391.g/Lus10038489.g/Lus10039092.g/Lus10015831.g/Lus10006416.g/Lus10021663.g/Lus10035512.g/Lus10023509.g/Lus10013778.g/Lus10030544.g/Lus10039…	231
GO:0009522	CC	photosystem I	59/2903	73/32470	8.22116e-49	1.36882e-46	1.10927e-46	Lus10007362.g/Lus10008594.g/Lus10042219.g/Lus10023320.g/Lus10023321.g/Lus10038490.g/Lus10020417.g/Lus10027966.g/Lus10015834.g/Lus10008191.g/Lus10038575.g/scaffold123.321/Lus10037875.g/Lus10041966.g/Lus10001644.g/Lus10001741.g/Lus10020415.g/Lus10040391.g/Lus10038489.g/Lus10015831.g/Lus10006416.g/Lus10021663.g/Lus10035512.g/Lus10023509.g/C8309561.1/Lus10013778.g/Lus10039156.g/Lus10021730.g/Lus10001…	59
GO:0016168	MF	chlorophyll binding	47/2903	59/32470	1.39635e-38	2.22384e-36	1.80215e-36	Lus10007362.g/Lus10008594.g/Lus10042219.g/Lus10023320.g/Lus10023321.g/Lus10038490.g/Lus10020417.g/Lus10027966.g/Lus10015834.g/Lus10008191.g/Lus10038575.g/scaffold123.321/Lus10037875.g/Lus10041966.g/Lus10001644.g/Lus10001741.g/Lus10020415.g/Lus10040391.g/Lus10038489.g/Lus10020418.g/Lus10015831.g/Lus10006416.g/Lus10021663.g/Lus10035512.g/Lus10023509.g/C8309561.1/Lus10013778.g/Lus10039156.g/Lus10021…	47
GO:0009523	CC	photosystem II	51/2903	71/32470	8.20338e-38	1.25204e-35	1.01463e-35	Lus10007362.g/Lus10008594.g/Lus10042219.g/Lus10023321.g/Lus10027966.g/Lus10008191.g/Lus10020071.g/Lus10001741.g/Lus10038489.g/Lus10006751.g/Lus10025007.g/Lus10020717.g/Lus10040314.g/Lus10029785.g/Lus10018385.g/Lus10001169.g/Lus10029823.g/Lus10016419.g/Lus10036622.g/Lus10042812.g/Lus10000614.g/Lus10033862.g/Lus10000352.g/Lus10035839.g/Lus10033434.g/Lus10006243.g/Lus10030719.g/Lus10030326.g/Lus1000…	51
GO:0006091	BP	generation of precursor metabolites and energy	127/2903	406/32470	1.19757e-37	1.75468e-35	1.42196e-35	Lus10007362.g/Lus10008594.g/Lus10042219.g/Lus10023320.g/Lus10023321.g/Lus10038490.g/Lus10020417.g/Lus10027966.g/Lus10015834.g/Lus10008191.g/Lus10038575.g/scaffold123.321/Lus10037875.g/Lus10001644.g/Lus10001741.g/Lus10020415.g/Lus10040391.g/Lus10038489.g/Lus10020418.g/Lus10015831.g/Lus10006416.g/Lus10021663.g/Lus10027421.g/Lus10035512.g/Lus10023509.g/C8309561.1/Lus10013778.g/Lus10039156.g/Lus10021…	127
GO:0031984	CC	organelle subcompartment	231/2903	1097/32470	8.13657e-36	1.14632e-33	9.28953e-34	Lus10007362.g/Lus10043090.g/Lus10008594.g/Lus10037891.g/scaffold605.84/Lus10042219.g/Lus10023320.g/Lus10023321.g/Lus10038490.g/Lus10020417.g/Lus10027966.g/Lus10015834.g/C8171617.1/Lus10032935.g/Lus10008191.g/Lus10038575.g/scaffold123.321/Lus10037875.g/Lus10001644.g/Lus10020071.g/Lus10001741.g/Lus10020415.g/Lus10040391.g/Lus10038489.g/Lus10020418.g/Lus10015831.g/Lus10006751.g/Lus10006416.g/Lus1002…	231
GO:0009765	BP	photosynthesis, light harvesting	45/2903	61/32470	2.27177e-34	3.08203e-32	2.49762e-32	Lus10007362.g/Lus10008594.g/Lus10042219.g/Lus10023320.g/Lus10023321.g/Lus10038490.g/Lus10020417.g/Lus10027966.g/Lus10015834.g/Lus10008191.g/Lus10038575.g/scaffold123.321/Lus10037875.g/Lus10001644.g/Lus10001741.g/Lus10020415.g/Lus10040391.g/Lus10038489.g/Lus10020418.g/Lus10015831.g/Lus10006416.g/Lus10021663.g/Lus10035512.g/Lus10023509.g/C8309561.1/Lus10013778.g/Lus10039156.g/Lus10021730.g/Lus10001…	45
GO:0009768	BP	photosynthesis, light harvesting in photosystem I	32/2903	35/32470	1.18806e-30	1.50065e-28	1.21609e-28	Lus10007362.g/Lus10008594.g/Lus10042219.g/Lus10023321.g/Lus10038490.g/Lus10020417.g/Lus10027966.g/Lus10015834.g/Lus10008191.g/Lus10038575.g/scaffold123.321/Lus10037875.g/Lus10001741.g/Lus10020415.g/Lus10040391.g/Lus10038489.g/Lus10015831.g/Lus10006416.g/Lus10035512.g/Lus10023509.g/Lus10013778.g/Lus10039156.g/Lus10021730.g/Lus10001169.g/Lus10011361.g/Lus10027786.g/Lus10042657.g/Lus10016074.g/Lus10…	32
GO:0031409	MF	pigment binding	32/2903	35/32470	1.18806e-30	1.50065e-28	1.21609e-28	Lus10007362.g/Lus10008594.g/Lus10042219.g/Lus10023321.g/Lus10038490.g/Lus10020417.g/Lus10027966.g/Lus10015834.g/Lus10008191.g/Lus10038575.g/scaffold123.321/Lus10037875.g/Lus10001741.g/Lus10020415.g/Lus10040391.g/Lus10038489.g/Lus10015831.g/Lus10006416.g/Lus10035512.g/Lus10023509.g/Lus10013778.g/Lus10039156.g/Lus10021730.g/Lus10001169.g/Lus10011361.g/Lus10027786.g/Lus10042657.g/Lus10016074.g/Lus10…	32
GO:0018298	BP	protein-chromophore linkage	43/2903	64/32470	3.77615e-30	4.61067e-28	3.7364e-28	Lus10007362.g/Lus10008594.g/Lus10042219.g/Lus10023320.g/Lus10023321.g/Lus10038490.g/Lus10020417.g/Lus10027966.g/Lus10015834.g/Lus10008191.g/Lus10038575.g/scaffold123.321/Lus10037875.g/Lus10001644.g/Lus10001741.g/Lus10020415.g/Lus10040391.g/Lus10038489.g/Lus10020418.g/Lus10015831.g/Lus10006416.g/Lus10021663.g/Lus10035512.g/Lus10023509.g/C8309561.1/Lus10013778.g/Lus10039156.g/Lus10021730.g/Lus10001…	43
GO:0009654	CC	photosystem II oxygen evolving complex	32/2903	40/32470	8.91431e-27	1.05333e-24	8.53594e-25	Lus10020071.g/Lus10006751.g/Lus10020717.g/Lus10040314.g/Lus10029785.g/Lus10018385.g/Lus10029823.g/Lus10016419.g/Lus10036622.g/Lus10042812.g/Lus10000614.g/Lus10000352.g/Lus10035839.g/Lus10030719.g/Lus10030326.g/Lus10007627.g/Lus10037159.g/Lus10031517.g/Lus10015165.g/Lus10022479.g/Lus10002286.g/Lus10024959.g/Lus10023436.g/Lus10003289.g/Lus10004054.g/Lus10022110.g/Lus10016783.g/Lus10001861.g/Lus1002…	32
GO:0006779	BP	porphyrin-containing compound biosynthetic process	40/2903	65/32470	6.08566e-26	6.96618e-24	5.64525e-24	Lus10038638.g/Lus10016730.g/Lus10025423.g/Lus10030544.g/Lus10012892.g/scaffold76.164/Lus10015302.g/Lus10018068.g/Lus10018067.g/Lus10042061.g/Lus10021665.g/Lus10042932.g/Lus10019033.g/Lus10005013.g/Lus10001642.g/Lus10021087.g/Lus10042931.g/Lus10031000.g/Lus10011170.g/Lus10018069.g/Lus10029064.g/Lus10028226.g/Lus10034205.g/Lus10037912.g/Lus10010082.g/Lus10035398.g/Lus10036021.g/Lus10018051.g/Lus100…	40
GO:0033014	BP	tetrapyrrole biosynthetic process	42/2903	73/32470	1.63771e-25	1.81786e-23	1.47315e-23	Lus10038638.g/Lus10016730.g/Lus10025423.g/Lus10030544.g/Lus10012892.g/scaffold76.164/Lus10015302.g/Lus10040987.g/Lus10018068.g/Lus10018067.g/Lus10042061.g/Lus10021665.g/Lus10042932.g/Lus10019033.g/Lus10005013.g/Lus10001642.g/Lus10021087.g/Lus10042931.g/Lus10031000.g/Lus10011170.g/Lus10018069.g/Lus10029064.g/Lus10028226.g/Lus10013439.g/Lus10034205.g/Lus10037912.g/Lus10010082.g/Lus10035398.g/Lus100…	42
GO:0010287	CC	plastoglobule	42/2903	75/32470	7.18878e-25	7.74485e-23	6.27627e-23	Lus10007362.g/Lus10008594.g/Lus10042219.g/Lus10023321.g/Lus10038490.g/Lus10020417.g/Lus10027966.g/Lus10015834.g/Lus10008191.g/Lus10038575.g/scaffold123.321/Lus10037875.g/Lus10001644.g/Lus10001741.g/Lus10020415.g/Lus10040391.g/Lus10038489.g/Lus10015831.g/Lus10006416.g/Lus10021663.g/Lus10035512.g/Lus10023509.g/Lus10013778.g/Lus10039156.g/Lus10021730.g/Lus10001169.g/Lus10011361.g/Lus10027786.g/Lus10…	42
GO:0033013	BP	tetrapyrrole metabolic process	47/2903	104/32470	2.12062e-22	2.21938e-20	1.79854e-20	Lus10038638.g/Lus10016730.g/Lus10025423.g/Lus10030544.g/Lus10012892.g/scaffold76.164/Lus10015302.g/Lus10040987.g/Lus10018068.g/Lus10018067.g/Lus10042061.g/Lus10021665.g/Lus10042932.g/Lus10019033.g/Lus10005013.g/Lus10001642.g/Lus10021087.g/Lus10042524.g/Lus10042931.g/Lus10031000.g/Lus10011170.g/Lus10018069.g/Lus10023644.g/Lus10029064.g/Lus10028226.g/Lus10013439.g/Lus10034205.g/Lus10037912.g/Lus100…	47
GO:0009657	BP	plastid organization	60/2903	165/32470	3.19126e-22	3.24711e-20	2.63139e-20	Lus10016579.g/Lus10012137.g/Lus10006812.g/Lus10004829.g/Lus10035863.g/Lus10017912.g/Lus10043055.g/Lus10010412.g/Lus10010200.g/Lus10020545.g/Lus10022041.g/Lus10035720.g/Lus10035227.g/Lus10002497.g/Lus10008075.g/Lus10032061.g/Lus10038843.g/Lus10005787.g/Lus10038125.g/Lus10031435.g/Lus10006942.g/Lus10034925.g/Lus10012171.g/Lus10039499.g/Lus10025799.g/Lus10041329.g/Lus10011151.g/Lus10037064.g/Lus1004…	60
GO:0006778	BP	porphyrin-containing compound metabolic process	45/2903	98/32470	7.3602e-22	7.2866e-20	5.90491e-20	Lus10038638.g/Lus10016730.g/Lus10025423.g/Lus10030544.g/Lus10012892.g/scaffold76.164/Lus10015302.g/Lus10018068.g/Lus10018067.g/Lus10042061.g/Lus10021665.g/Lus10042932.g/Lus10019033.g/Lus10005013.g/Lus10001642.g/Lus10021087.g/Lus10042524.g/Lus10042931.g/Lus10031000.g/Lus10011170.g/Lus10018069.g/Lus10023644.g/Lus10029064.g/Lus10028226.g/Lus10034205.g/Lus10037912.g/Lus10010082.g/Lus10030092.g/Lus100…	45
GO:0015995	BP	chlorophyll biosynthetic process	25/2903	32/32470	9.98368e-21	9.62374e-19	7.79888e-19	Lus10038638.g/Lus10016730.g/Lus10025423.g/scaffold76.164/Lus10015302.g/Lus10018068.g/Lus10018067.g/Lus10042061.g/Lus10021665.g/Lus10019033.g/Lus10005013.g/Lus10001642.g/Lus10031000.g/Lus10018069.g/Lus10028226.g/Lus10037912.g/Lus10010082.g/Lus10035398.g/Lus10036021.g/Lus10018051.g/Lus10039883.g/Lus10042048.g/Lus10013636.g/Lus10029675.g/Lus10027815.g	25
GO:0046148	BP	pigment biosynthetic process	47/2903	115/32470	3.65296e-20	3.43097e-18	2.78039e-18	Lus10038638.g/Lus10032249.g/Lus10016730.g/Lus10025423.g/Lus10030544.g/Lus10012892.g/scaffold76.164/Lus10015302.g/Lus10024612.g/Lus10018068.g/Lus10018067.g/Lus10042061.g/Lus10021665.g/Lus10042932.g/Lus10019033.g/Lus10005013.g/Lus10001642.g/Lus10042931.g/Lus10031000.g/Lus10011170.g/Lus10016221.g/Lus10018069.g/Lus10029321.g/Lus10028226.g/Lus10037912.g/Lus10010082.g/Lus10035398.g/Lus10036021.g/Lus100…	47
GO:0042440	BP	pigment metabolic process	51/2903	147/32470	4.31376e-18	3.95032e-16	3.20126e-16	Lus10038638.g/Lus10032249.g/Lus10016730.g/Lus10025423.g/Lus10030544.g/Lus10012892.g/scaffold76.164/Lus10015302.g/Lus10024612.g/Lus10018068.g/Lus10018067.g/Lus10042061.g/Lus10021665.g/Lus10042932.g/Lus10019033.g/Lus10005013.g/Lus10001642.g/Lus10042931.g/Lus10031000.g/Lus10011170.g/Lus10016221.g/Lus10018069.g/Lus10023644.g/Lus10029321.g/Lus10028226.g/Lus10037912.g/Lus10010082.g/Lus10030092.g/Lus100…	51
GO:0031977	CC	thylakoid lumen	29/2903	54/32470	6.15347e-17	5.4976e-15	4.45515e-15	Lus10037891.g/Lus10020071.g/Lus10006751.g/Lus10018385.g/Lus10036622.g/Lus10035839.g/Lus10030109.g/Lus10042524.g/Lus10020942.g/Lus10010200.g/Lus10040008.g/Lus10019578.g/Lus10007627.g/Lus10008718.g/Lus10007262.g/Lus10042897.g/Lus10003289.g/Lus10022110.g/Lus10028194.g/scaffold413.126/Lus10006111.g/Lus10035473.g/Lus10001861.g/Lus10020342.g/Lus10041904.g/Lus10042822.g/Lus10009521.g/Lus10006949.g/Lus10…	29
GO:0098796	CC	membrane protein complex	116/2903	586/32470	2.28533e-16	1.99313e-14	1.61519e-14	Lus10007362.g/Lus10008594.g/Lus10042219.g/Lus10023320.g/Lus10023321.g/Lus10038490.g/Lus10020417.g/Lus10027966.g/Lus10015834.g/Lus10040810.g/Lus10008191.g/Lus10038575.g/scaffold123.321/Lus10037875.g/Lus10041966.g/Lus10001644.g/Lus10020071.g/Lus10001741.g/Lus10020415.g/Lus10040391.g/Lus10038489.g/Lus10015831.g/Lus10006751.g/Lus10006416.g/Lus10021663.g/Lus10025007.g/Lus10020717.g/Lus10035512.g/Lus10…	116
GO:0009658	BP	chloroplast organization	44/2903	129/32470	1.69052e-15	1.44009e-13	1.16702e-13	Lus10016579.g/Lus10012137.g/Lus10006812.g/Lus10017912.g/Lus10043055.g/Lus10010412.g/Lus10020545.g/Lus10022041.g/Lus10035227.g/Lus10008075.g/Lus10032061.g/Lus10038843.g/Lus10005787.g/Lus10031435.g/Lus10006942.g/Lus10012171.g/Lus10041329.g/Lus10011151.g/Lus10037064.g/Lus10042587.g/Lus10042051.g/Lus10001525.g/Lus10029836.g/Lus10039883.g/Lus10003872.g/Lus10013630.g/Lus10035171.g/Lus10020304.g/Lus1000…	44
GO:0009416	BP	response to light stimulus	69/2903	280/32470	4.96745e-15	4.1354e-13	3.35124e-13	Lus10007362.g/Lus10008594.g/Lus10042219.g/Lus10023321.g/Lus10038490.g/Lus10020417.g/Lus10027966.g/Lus10015834.g/Lus10008191.g/Lus10038575.g/scaffold123.321/Lus10037875.g/Lus10001741.g/Lus10020415.g/Lus10040391.g/Lus10038489.g/Lus10015831.g/Lus10013057.g/Lus10006416.g/Lus10035512.g/Lus10023509.g/Lus10013778.g/Lus10016579.g/Lus10039156.g/Lus10021730.g/Lus10029102.g/Lus10016155.g/Lus10009168.g/Lus10…	69
GO:0015994	BP	chlorophyll metabolic process	28/2903	59/32470	1.33915e-14	1.09007e-12	8.8337e-13	Lus10038638.g/Lus10016730.g/Lus10025423.g/scaffold76.164/Lus10015302.g/Lus10018068.g/Lus10018067.g/Lus10042061.g/Lus10021665.g/Lus10019033.g/Lus10005013.g/Lus10001642.g/Lus10042524.g/Lus10031000.g/Lus10018069.g/Lus10023644.g/Lus10028226.g/Lus10037912.g/Lus10010082.g/Lus10035398.g/Lus10036021.g/Lus10018051.g/Lus10039883.g/Lus10042048.g/Lus10013636.g/Lus10029675.g/Lus10012325.g/Lus10027815.g	28
GO:0009628	BP	response to abiotic stimulus	118/2903	639/32470	2.33882e-14	1.86241e-12	1.50926e-12	Lus10008612.g/Lus10042203.g/Lus10037473.g/Lus10007362.g/Lus10008594.g/Lus10042219.g/Lus10023321.g/Lus10038490.g/Lus10020417.g/Lus10027966.g/Lus10015834.g/Lus10008191.g/Lus10038575.g/scaffold123.321/Lus10037875.g/Lus10001741.g/Lus10020415.g/Lus10040391.g/Lus10038489.g/Lus10037750.g/Lus10015831.g/Lus10013057.g/Lus10006416.g/Lus10035512.g/Lus10023509.g/Lus10013778.g/Lus10016579.g/Lus10039156.g/Lus10…	118
GO:0051186	BP	cofactor metabolic process	100/2903	520/32470	1.75058e-13	1.36434e-11	1.10563e-11	Lus10038638.g/Lus10029124.g/Lus10016730.g/Lus10025423.g/Lus10030544.g/Lus10012892.g/Lus10029142.g/scaffold76.164/Lus10005849.g/Lus10015302.g/Lus10009180.g/Lus10018068.g/Lus10018067.g/Lus10019464.g/Lus10028806.g/Lus10042061.g/Lus10021665.g/Lus10042932.g/Lus10019033.g/Lus10005013.g/Lus10001642.g/Lus10030915.g/Lus10021087.g/Lus10042524.g/Lus10042931.g/Lus10031000.g/Lus10007575.g/Lus10011170.g/Lus100…	100
GO:0009314	BP	response to radiation	69/2903	309/32470	8.29951e-13	6.33356e-11	5.13259e-11	Lus10007362.g/Lus10008594.g/Lus10042219.g/Lus10023321.g/Lus10038490.g/Lus10020417.g/Lus10027966.g/Lus10015834.g/Lus10008191.g/Lus10038575.g/scaffold123.321/Lus10037875.g/Lus10001741.g/Lus10020415.g/Lus10040391.g/Lus10038489.g/Lus10015831.g/Lus10013057.g/Lus10006416.g/Lus10035512.g/Lus10023509.g/Lus10013778.g/Lus10016579.g/Lus10039156.g/Lus10021730.g/Lus10029102.g/Lus10016155.g/Lus10009168.g/Lus10…	69
GO:1990204	CC	oxidoreductase complex	39/2903	129/32470	5.05827e-12	3.78132e-10	3.0643e-10	Lus10020071.g/Lus10006751.g/Lus10020717.g/Lus10040314.g/Lus10029785.g/Lus10022308.g/Lus10018385.g/Lus10029823.g/Lus10016419.g/Lus10036622.g/Lus10042812.g/Lus10000614.g/Lus10000352.g/Lus10035839.g/Lus10030719.g/Lus10030326.g/Lus10007627.g/Lus10037159.g/Lus10031517.g/Lus10015165.g/Lus10022479.g/Lus10002286.g/Lus10024959.g/Lus10023436.g/Lus10003289.g/Lus10014727.g/Lus10004054.g/Lus10022110.g/Lus1001…	39
GO:0016853	MF	isomerase activity	92/2903	494/32470	1.04068e-11	7.62401e-10	6.17834e-10	Lus10037891.g/Lus10038601.g/Lus10031342.g/Lus10038015.g/Lus10032151.g/Lus10009619.g/Lus10015835.g/Lus10009180.g/Lus10018383.g/Lus10009255.g/Lus10024330.g/Lus10027195.g/Lus10008990.g/Lus10014534.g/Lus10041307.g/Lus10009327.g/Lus10016811.g/Lus10003741.g/Lus10002040.g/Lus10038911.g/Lus10038216.g/Lus10040008.g/Lus10019578.g/Lus10042696.g/Lus10023622.g/Lus10007575.g/Lus10015365.g/Lus10016037.g/Lus1002…	92
GO:0051188	BP	cofactor biosynthetic process	64/2903	292/32470	1.30157e-11	9.34832e-10	7.57569e-10	Lus10038638.g/Lus10029124.g/Lus10016730.g/Lus10025423.g/Lus10030544.g/Lus10012892.g/Lus10029142.g/scaffold76.164/Lus10015302.g/Lus10018068.g/Lus10018067.g/Lus10019464.g/Lus10042061.g/Lus10021665.g/Lus10042932.g/Lus10019033.g/Lus10005013.g/Lus10001642.g/Lus10030915.g/Lus10021087.g/Lus10042931.g/Lus10031000.g/Lus10011170.g/Lus10038318.g/Lus10016221.g/Lus10018069.g/Lus10013023.g/Lus10013038.g/Lus100…	64
GO:0009767	BP	photosynthetic electron transport chain	20/2903	40/32470	2.3675e-11	1.66772e-09	1.35149e-09	Lus10036622.g/Lus10035839.g/Lus10028806.g/Lus10030191.g/Lus10012452.g/Lus10036613.g/Lus10035831.g/scaffold413.126/Lus10002626.g/Lus10002312.g/Lus10035751.g/Lus10021824.g/Lus10038292.g/Lus10041904.g/Lus10002673.g/Lus10037330.g/Lus10036614.g/Lus10025809.g/Lus10020508.g/Lus10006594.g	20
GO:0009538	CC	photosystem I reaction center	10/2903	10/32470	3.21744e-11	2.18249e-09	1.76865e-09	Lus10041209.g/Lus10018273.g/Lus10040639.g/Lus10002143.g/Lus10022846.g/Lus10011913.g/Lus10008747.g/Lus10021923.g/Lus10025798.g/Lus10035864.g	10
GO:0098807	CC	chloroplast thylakoid membrane protein complex	10/2903	10/32470	3.21744e-11	2.18249e-09	1.76865e-09	Lus10020071.g/Lus10006751.g/Lus10018385.g/Lus10009168.g/Lus10036622.g/Lus10035839.g/Lus10028806.g/Lus10007627.g/Lus10030191.g/Lus10002673.g	10
GO:0044283	BP	small molecule biosynthetic process	121/2903	736/32470	3.8042e-11	2.5336e-09	2.05318e-09	Lus10004935.g/Lus10040883.g/Lus10023884.g/Lus10027421.g/Lus10029124.g/Lus10018484.g/Lus10001002.g/Lus10029142.g/Lus10019342.g/Lus10009168.g/Lus10033987.g/Lus10008307.g/Lus10039094.g/Lus10011191.g/Lus10023161.g/Lus10005771.g/Lus10019464.g/Lus10011022.g/Lus10011488.g/Lus10020812.g/Lus10027056.g/Lus10021665.g/Lus10012751.g/Lus10002545.g/Lus10023128.g/Lus10027399.g/Lus10030915.g/Lus10014390.g/Lus1000…	121
GO:0032544	BP	plastid translation	11/2903	13/32470	1.88635e-10	1.23388e-08	9.99909e-09	Lus10004829.g/Lus10035863.g/Lus10022041.g/Lus10035720.g/Lus10002497.g/Lus10038125.g/Lus10031435.g/Lus10025799.g/Lus10042587.g/Lus10001525.g/Lus10005180.g	11
GO:0016851	MF	magnesium chelatase activity	10/2903	11/32470	3.25243e-10	2.01926e-08	1.63637e-08	Lus10025423.g/Lus10015302.g/Lus10018068.g/Lus10018067.g/Lus10042061.g/Lus10019033.g/Lus10005013.g/Lus10018069.g/Lus10032756.g/Lus10002789.g	10
GO:0051002	MF	ligase activity, forming nitrogen-metal bonds	10/2903	11/32470	3.25243e-10	2.01926e-08	1.63637e-08	Lus10025423.g/Lus10015302.g/Lus10018068.g/Lus10018067.g/Lus10042061.g/Lus10019033.g/Lus10005013.g/Lus10018069.g/Lus10032756.g/Lus10002789.g	10
GO:0051003	MF	ligase activity, forming nitrogen-metal bonds, forming coordination complexes	10/2903	11/32470	3.25243e-10	2.01926e-08	1.63637e-08	Lus10025423.g/Lus10015302.g/Lus10018068.g/Lus10018067.g/Lus10042061.g/Lus10019033.g/Lus10005013.g/Lus10018069.g/Lus10032756.g/Lus10002789.g	10
[truncated: 3,604 more rows]

## Sheet: Z141_vs_NY17_DS_up_common_GO_en
ID	GO_Type	Description	GeneRatio	BgRatio	pvalue	p.adjust	qvalue	geneID	Count
GO:0006561	BP	proline biosynthetic process	10/1135	18/32470	8.87965e-11	2.45256e-07	2.17411e-07	Lus10004697.g/Lus10040264.g/Lus10004696.g/Lus10040262.g/Lus10040263.g/Lus10034453.g/Lus10001018.g/Lus10019103.g/Lus10001019.g/Lus10037544.g	10
[truncated: 2,761 more rows]

## Sheet: Z141_vs_NY17_DS_down_common_GO_
ID	GO_Type	Description	GeneRatio	BgRatio	pvalue	p.adjust	qvalue	geneID	Count
[truncated: 2,957 more rows]

## Sheet: Z141_DS_vs_RD_up_common_GO_enri
ID	GO_Type	Description	GeneRatio	BgRatio	pvalue	p.adjust	qvalue	geneID	Count
[truncated: 3,115 more rows]

[truncated: 21 more sheets: Z141_DS_vs_RD_down_common_GO_en, Z141_DS_RD_up_common_GO_enrich_, NY17_DS_vs_RD_up_common_GO_enri, NY17_DS_vs_RD_down_common_GO_en, Z141_vs_NY17_DS_down_NY17_uniqu, Z141_vs_NY17_DS_down_Z141_uniqu, Z141_vs_NY17_DS_up_NY17_unique_, Z141_vs_NY17_DS_up_Z141_unique_, Z141_vs_NY17_RD_down_NY17_uniqu, Z141_vs_NY17_RD_down_Z141_uniqu, Z141_vs_NY17_RD_up_NY17_unique_, Z141_vs_NY17_RD_up_Z141_unique_, NY17_DS_vs_RD_down_DS_unique_GO, NY17_DS_vs_RD_down_RD_unique_GO, Z141_DS_vs_RD_down_DS_unique_GO, Z141_DS_vs_RD_up_RD_unique_GO_e, Z141_DS_vs_RD_up_DS_unique_GO_e, Z141_DS_vs_RD_down_RD_unique_GO, NY17_DS_vs_RD_up_DS_unique_GO_e, NY17_DS_vs_RD_up_RD_unique_GO_e …]
