# Supplementary material for: Transcriptome analysis and molecular mechanism of linseed (Linum usitatissimum L.) drought tolerance under repeated drought using single-molecule long-read sequencing
Source: BMC Genomics. 2021 Feb 9;22:109. doi: 10.1186/s12864-021-07416-5 (PMC7871411; doi:10.1186/s12864-021-07416-5)
Supplement: Supplementary file 19 — Additional file 19: Table S15. The results of candidate genes expression and functional analysis. [file 12864_2021_7416_MOESM19_ESM.xlsx]

## Sheet: all_rela_path_gene
Table S15. The results of candidate genes expression and functional analysis.
Target GO	Gene	z141-NE-1	z141-NE-2	NY17-NE-1	NY17-NE-2	z141-RW-1	z141-RW-2	z141-RD-1	z141-RD-2	z141-DS-1	z141-DS-2	NY17-DS-1	NY17-DS-2	NY17-RW-1	NY17-RW-2	NY17-RD-1	NY17-RD-2	NR_protein_accession	NR_defination	GO(biological_process)	GO(cellular_component)	GO(molecular_function)	KO_ID|KO_name|Hyperlink	Pathway_ID(KEGG_pathway)	KOG_ID(Abbreviation)(KOG_Description)	Swiss-Prot_ID	Swiss-Prot_Annotation
cellular response to abiotic stimulus	Lus10000310.g	0.51	0.26	0.26	0.08	4.53	7.88	3019.93	3586.1	294.89	277.69	149.7	124.26	0.83	0.74	3019.28	2263.22	XP_017644879.1	PREDICTED: bidirectional sugar transporter SWEET15-like [Gossypium arboreum]	GO:0006810(transport);GO:0008643(carbohydrate transport);GO:0010150(leaf senescence);GO:0071470(cellular response to osmotic stress);GO:0015770(sucrose transport)	GO:0016021(integral component of membrane);GO:0016020(membrane);GO:0005887(integral component of plasma membrane);GO:0005886(plasma membrane)	GO:0008515(sucrose transmembrane transporter activity);GO:0051119(sugar transmembrane transporter activity)	K15382|SLC50A, SWEET|http://www.genome.jp/dbget-bin/www_bget?ko:K15382	*	*	sp|Q9FY94|SWT15_ARATH;sp|P93332|NOD3_MEDTR	sp|Q9FY94|SWT15_ARATH Bidirectional sugar transporter SWEET15 OS=Arabidopsis thaliana GN=SWEET15 PE=1 SV=1;sp|P93332|NOD3_MEDTR Bidirectional sugar transporter N3 OS=Medicago truncatula GN=N3 PE=2 SV=1
cellular response to abiotic stimulus	Lus10002028.g	2.24	3.26	1.4	2.55	15.24	17	13.31	19.46	11.24	10.16	5.89	8.25	12.68	15.99	17.54	13.12	XP_002515537.1	PREDICTED: transcription factor HY5 [Ricinus communis]	GO:0006355(regulation of transcription, DNA-templated);GO:0010099(regulation of photomorphogenesis);GO:0031539(positive regulation of anthocyanin metabolic process);GO:0010017(red or far-red light signaling pathway);GO:0009737(response to abscisic acid);GO:0009740(gibberellic acid mediated signaling pathway);GO:0010224(response to UV-B);GO:0042753(positive regulation of circadian rhythm)	GO:0005634(nucleus)	GO:0003677(DNA binding);GO:0003700(transcription factor activity, sequence-specific DNA binding);GO:0043565(sequence-specific DNA binding);GO:0003690(double-stranded DNA binding)	K16241|HY5|http://www.genome.jp/dbget-bin/www_bget?ko:K16241	ko04712(Circadian rhythm - plant)	*	sp|O24646|HY5_ARATH	sp|O24646|HY5_ARATH Transcription factor HY5 OS=Arabidopsis thaliana GN=HY5 PE=1 SV=1
cellular response to abiotic stimulus	Lus10002900.g	1.86	4.02	2.11	2.01	25.2	25.5	29.04	33.75	13.3	19.22	11.68	11.84	24.56	28.73	40.58	31.03	XP_002324289.1	bZIP with a Ring-finger motif family protein [Populus trichocarpa]	GO:0006355(regulation of transcription, DNA-templated);GO:0010099(regulation of photomorphogenesis);GO:0031539(positive regulation of anthocyanin metabolic process);GO:0010017(red or far-red light signaling pathway);GO:0009737(response to abscisic acid);GO:0009740(gibberellic acid mediated signaling pathway);GO:0010224(response to UV-B);GO:0042753(positive regulation of circadian rhythm)	GO:0005634(nucleus)	GO:0003700(transcription factor activity, sequence-specific DNA binding);GO:0043565(sequence-specific DNA binding);GO:0003677(DNA binding);GO:0003690(double-stranded DNA binding)	K16241|HY5|http://www.genome.jp/dbget-bin/www_bget?ko:K16241	ko04712(Circadian rhythm - plant)	*	sp|O24646|HY5_ARATH	sp|O24646|HY5_ARATH Transcription factor HY5 OS=Arabidopsis thaliana GN=HY5 PE=1 SV=1
cellular response to abiotic stimulus	Lus10003810.g	23.04	20.59	17.99	20.76	64.43	64.83	121.62	118.48	53.87	52.57	40.09	47.14	50.03	51.24	101.66	99.17	KDP30425.1	hypothetical protein JCGZ_16664 [Jatropha curcas]	GO:0045893(positive regulation of transcription, DNA-templated);GO:0010218(response to far red light);GO:0010018(far-red light signaling pathway);GO:0009639(response to red or far red light);GO:0010017(red or far-red light signaling pathway);GO:0006355(regulation of transcription, DNA-templated);GO:0042753(positive regulation of circadian rhythm)	GO:0005634(nucleus)	GO:0008483(transaminase activity);GO:0003824(catalytic activity);GO:0030170(pyridoxal phosphate binding);GO:0016740(transferase activity);GO:0003867(4-aminobutyrate transaminase activity);GO:0003700(transcription factor activity, sequence-specific DNA binding);GO:0008270(zinc ion binding);GO:0042802(identical protein binding)	K16871|POP2|http://www.genome.jp/dbget-bin/www_bget?ko:K16871	ko00250(Alanine, aspartate and glutamate metabolism);ko00650(Butanoate metabolism)	KOG1402(E)(Ornithine aminotransferase);KOG1404(E)(Alanine-glyoxylate aminotransferase AGT2);KOG1401(E)(Acetylornithine aminotransferase)	sp|Q94CE5|GATP_ARATH;sp|Q9SWG3|FAR1_ARATH	sp|Q94CE5|GATP_ARATH Gamma-aminobutyrate transaminase POP2, mitochondrial OS=Arabidopsis thaliana GN=POP2 PE=1 SV=1;sp|Q9SWG3|FAR1_ARATH Protein FAR-RED IMPAIRED RESPONSE 1 OS=Arabidopsis thaliana GN=FAR1 PE=1 SV=1
cellular response to abiotic stimulus	Lus10005783.g	0.84	0.9	0.95	0.71	3.19	2.83	9.51	10.49	5.2	6.37	4.04	3.98	3.86	2.73	9.12	6.83	BAF03493.1	Ku70 homolog [Populus nigra]	GO:0071480(cellular response to gamma radiation);GO:0006310(DNA recombination);GO:0071481(cellular response to X-ray);GO:0000723(telomere maintenance);GO:0006303(double-strand break repair via nonhomologous end joining);GO:0032508(DNA duplex unwinding)	GO:0043564(Ku70:Ku80 complex);GO:0000784(nuclear chromosome, telomeric region);GO:0005634(nucleus)	GO:0004003(ATP-dependent DNA helicase activity);GO:0003677(DNA binding);GO:0003690(double-stranded DNA binding);GO:0042162(telomeric DNA binding);GO:0003684(damaged DNA binding);GO:0004386(helicase activity)	K10884|XRCC6, KU70, G22P1|http://www.genome.jp/dbget-bin/www_bget?ko:K10884	ko03450(Non-homologous end-joining)	KOG2327(L)(DNA-binding subunit of a DNA-dependent protein kinase (Ku70 autoantigen))	sp|Q7F1M0|KU70_ORYSJ;sp|Q9FQ08|KU70_ARATH	sp|Q7F1M0|KU70_ORYSJ ATP-dependent DNA helicase 2 subunit KU70 OS=Oryza sativa subsp. japonica GN=KU70 PE=1 SV=1;sp|Q9FQ08|KU70_ARATH ATP-dependent DNA helicase 2 subunit KU70 OS=Arabidopsis thaliana GN=KU70 PE=1 SV=1
cellular response to abiotic stimulus	Lus10006818.g	0.99	1.19	1.03	1.59	3.56	5.05	7.45	9	8.04	4.41	3.53	4.73	4.79	4.8	11.55	9.99	BAF03493.1	Ku70 homolog [Populus nigra]	GO:0071480(cellular response to gamma radiation);GO:0006310(DNA recombination);GO:0071481(cellular response to X-ray);GO:0000723(telomere maintenance);GO:0006303(double-strand break repair via nonhomologous end joining);GO:0032508(DNA duplex unwinding)	GO:0043564(Ku70:Ku80 complex);GO:0000784(nuclear chromosome, telomeric region);GO:0005634(nucleus)	GO:0004003(ATP-dependent DNA helicase activity);GO:0003677(DNA binding);GO:0003690(double-stranded DNA binding);GO:0042162(telomeric DNA binding);GO:0003684(damaged DNA binding);GO:0004386(helicase activity)	K10884|XRCC6, KU70, G22P1|http://www.genome.jp/dbget-bin/www_bget?ko:K10884	ko03450(Non-homologous end-joining)	KOG2327(L)(DNA-binding subunit of a DNA-dependent protein kinase (Ku70 autoantigen))	sp|Q7F1M0|KU70_ORYSJ	sp|Q7F1M0|KU70_ORYSJ ATP-dependent DNA helicase 2 subunit KU70 OS=Oryza sativa subsp. japonica GN=KU70 PE=1 SV=1
cellular response to abiotic stimulus	Lus10007459.g	2.25	2.02	2.18	2.12	6.73	5.1	8.87	7.51	11.03	9.42	6.32	7.3	5.05	7.48	9.34	7.24	XP_012077332.1	PREDICTED: protein EARLY FLOWERING 3 isoform X2 [Jatropha curcas]	GO:0048573(photoperiodism, flowering);GO:0009585(red, far-red light phototransduction);GO:0010119(regulation of stomatal movement);GO:0009909(regulation of flower development);GO:0010031(circumnutation);GO:0007623(circadian rhythm);GO:0009826(unidimensional cell growth)	GO:0005634(nucleus)	*	K12125|ELF3|http://www.genome.jp/dbget-bin/www_bget?ko:K12125	ko04712(Circadian rhythm - plant)	*	sp|O82804|ELF3_ARATH	sp|O82804|ELF3_ARATH Protein EARLY FLOWERING 3 OS=Arabidopsis thaliana GN=ELF3 PE=1 SV=1
cellular response to abiotic stimulus	Lus10007594.g	1.58	1.23	0.84	0.69	0.32	0.23	5.48	2.92	10.09	9.06	5.07	5.49	0.27	0.18	1.94	1.37	EOY11803.1	Phytochrome A [Theobroma cacao]	GO:0018298(protein-chromophore linkage);GO:0009585(red, far-red light phototransduction);GO:0009584(detection of visible light);GO:0017006(protein-tetrapyrrole linkage);GO:0007165(signal transduction);GO:0006351(transcription, DNA-templated);GO:0050896(response to stimulus);GO:0006355(regulation of transcription, DNA-templated);GO:0010018(far-red light signaling pathway);GO:0010203(response to ve…	GO:0005737(cytoplasm);GO:0016604(nuclear body);GO:0005634(nucleus)	GO:0009881(photoreceptor activity);GO:0000155(phosphorelay sensor kinase activity);GO:0042803(protein homodimerization activity);GO:0031516(far-red light photoreceptor activity);GO:0042802(identical protein binding)	K12120|PHYA|http://www.genome.jp/dbget-bin/www_bget?ko:K12120	ko04712(Circadian rhythm - plant)	*	sp|P06592|PHYA_CUCPE;sp|O49934|PHYA_POPTM	sp|P06592|PHYA_CUCPE Phytochrome A OS=Cucurbita pepo GN=PHYA PE=2 SV=1;sp|O49934|PHYA_POPTM Phytochrome A OS=Populus tremuloides GN=PHYA PE=2 SV=1
cellular response to abiotic stimulus	Lus10011335.g	0.15	0.17	0	0.44	4.51	19.41	61.65	95.6	0.38	0	0.33	1.09	2.94	2.16	27.38	57.76	XP_017644879.1	PREDICTED: bidirectional sugar transporter SWEET15-like [Gossypium arboreum]	GO:0006810(transport);GO:0008643(carbohydrate transport);GO:0010150(leaf senescence);GO:0071470(cellular response to osmotic stress);GO:0015770(sucrose transport)	GO:0016021(integral component of membrane);GO:0016020(membrane);GO:0005886(plasma membrane);GO:0005887(integral component of plasma membrane)	GO:0051119(sugar transmembrane transporter activity);GO:0008515(sucrose transmembrane transporter activity)	K15382|SLC50A, SWEET|http://www.genome.jp/dbget-bin/www_bget?ko:K15382	*	*	sp|Q9FY94|SWT15_ARATH	sp|Q9FY94|SWT15_ARATH Bidirectional sugar transporter SWEET15 OS=Arabidopsis thaliana GN=SWEET15 PE=1 SV=1
cellular response to abiotic stimulus	Lus10011777.g	173.84	193.16	170.77	196.26	700.58	936.09	503.42	733.29	89.48	72.75	80.25	72.68	709.32	584.3	732.17	770.1	XP_006298647.1	hypothetical protein CARUB_v10014736mg, partial [Capsella rubella]	GO:0071484(cellular response to light intensity);GO:0009773(photosynthetic electron transport in photosystem I);GO:0055114(oxidation-reduction process);GO:0010117(photoprotection);GO:0009414(response to water deprivation);GO:0009644(response to high light intensity)	GO:0009534(chloroplast thylakoid);GO:0009579(thylakoid);GO:0016020(membrane);GO:0009536(plastid);GO:0009535(chloroplast thylakoid membrane);GO:0009507(chloroplast)	GO:0009055(electron carrier activity);GO:0005515(protein binding)	*	*	*	sp|Q9SL05|PGR5_ARATH	sp|Q9SL05|PGR5_ARATH Protein PROTON GRADIENT REGULATION 5, chloroplastic OS=Arabidopsis thaliana GN=PGR5 PE=1 SV=1
cellular response to abiotic stimulus	Lus10015754.g	0.08	0	0	0.05	0.3	1.01	353.73	575.37	11.51	11.56	6.84	5.53	0.09	0	244.76	219.05	XP_018811841.1	PREDICTED: bidirectional sugar transporter N3 [Juglans regia]	GO:0006810(transport);GO:0008643(carbohydrate transport);GO:0010150(leaf senescence);GO:0071470(cellular response to osmotic stress);GO:0015770(sucrose transport)	GO:0016021(integral component of membrane);GO:0016020(membrane);GO:0005887(integral component of plasma membrane);GO:0005886(plasma membrane)	GO:0008515(sucrose transmembrane transporter activity);GO:0051119(sugar transmembrane transporter activity)	K15382|SLC50A, SWEET|http://www.genome.jp/dbget-bin/www_bget?ko:K15382	*	*	sp|Q9FY94|SWT15_ARATH	sp|Q9FY94|SWT15_ARATH Bidirectional sugar transporter SWEET15 OS=Arabidopsis thaliana GN=SWEET15 PE=1 SV=1
cellular response to abiotic stimulus	Lus10015868.g	0.35	0.41	0.73	0.39	0.33	0.55	1.96	2.58	3.13	2.34	2.79	2.49	0.78	0.54	2.05	2.12	XP_002320725.2	Ku80 family protein [Populus trichocarpa]	GO:0071480(cellular response to gamma radiation);GO:0006974(cellular response to DNA damage stimulus);GO:0006310(DNA recombination);GO:0006281(DNA repair);GO:0071481(cellular response to X-ray);GO:0000723(telomere maintenance);GO:0006303(double-strand break repair via nonhomologous end joining);GO:0032508(DNA duplex unwinding);GO:0006302(double-strand break repair)	GO:0043564(Ku70:Ku80 complex);GO:0000784(nuclear chromosome, telomeric region);GO:0005634(nucleus)	GO:0004003(ATP-dependent DNA helicase activity);GO:0003677(DNA binding);GO:0005524(ATP binding);GO:0003690(double-stranded DNA binding);GO:0004386(helicase activity);GO:0042162(telomeric DNA binding);GO:0000166(nucleotide binding);GO:0016817(hydrolase activity, acting on acid anhydrides);GO:0016787(hydrolase activity);GO:0003684(damaged DNA binding)	K10885|XRCC5, KU80, G22P2|http://www.genome.jp/dbget-bin/www_bget?ko:K10885	ko03450(Non-homologous end-joining)	KOG2326(L)(DNA-binding subunit of a DNA-dependent protein kinase (Ku80 autoantigen))	sp|Q9FQ09|KU80_ARATH	sp|Q9FQ09|KU80_ARATH ATP-dependent DNA helicase 2 subunit KU80 OS=Arabidopsis thaliana GN=KU80 PE=1 SV=1
cellular response to abiotic stimulus	Lus10029911.g	1.97	1.82	1.7	1.52	1.37	1.32	4.49	4.31	6	4.56	5.02	4.27	2.15	1.69	5.2	4.74	XP_011023612.1	PREDICTED: LOW QUALITY PROTEIN: DNA polymerase zeta catalytic subunit [Populus euphratica]	GO:0019985(translesion synthesis);GO:0006281(DNA repair);GO:0006260(DNA replication);GO:0071494(cellular response to UV-C);GO:0006974(cellular response to DNA damage stimulus);GO:0042276(error-prone translesion synthesis);GO:0009411(response to UV);GO:0010224(response to UV-B)	GO:0016035(zeta DNA polymerase complex);GO:0005634(nucleus)	GO:0003677(DNA binding);GO:0016740(transferase activity);GO:0003676(nucleic acid binding);GO:0003887(DNA-directed DNA polymerase activity);GO:0008408(3'-5' exonuclease activity);GO:0000166(nucleotide binding);GO:0016779(nucleotidyltransferase activity);GO:0046872(metal ion binding);GO:0051536(iron-sulfur cluster binding);GO:0051539(4 iron, 4 sulfur cluster binding)	K02350|POLZ1, rev3|http://www.genome.jp/dbget-bin/www_bget?ko:K02350	*	KOG0969(L)(DNA polymerase delta, catalytic subunit)	sp|Q766Z3|REV3_ARATH	sp|Q766Z3|REV3_ARATH DNA polymerase zeta catalytic subunit OS=Arabidopsis thaliana GN=REV3 PE=2 SV=1
cellular response to abiotic stimulus	Lus10030373.g	7.37	6.47	5.82	3.34	17.91	28.25	14.12	11.33	4.39	5.51	5.22	5.12	21.28	15.89	17.29	11.41	XP_015891879.1	PREDICTED: phytochrome A-associated F-box protein [Ziziphus jujuba]	GO:0048573(photoperiodism, flowering);GO:0048366(leaf development);GO:0010099(regulation of photomorphogenesis);GO:0009585(red, far-red light phototransduction);GO:0005975(carbohydrate metabolic process)	GO:0005634(nucleus)	GO:0004553(hydrolase activity, hydrolyzing O-glycosyl compounds);GO:0016787(hydrolase activity)	K19964|HIUH|http://www.genome.jp/dbget-bin/www_bget?ko:K19964	ko00230(Purine metabolism)	*	sp|Q8LEA8|EID1_ARATH;sp|Q8S3J3|HIUH_SOYBN	sp|Q8LEA8|EID1_ARATH Phytochrome A-associated F-box protein OS=Arabidopsis thaliana GN=EID1 PE=1 SV=2;sp|Q8S3J3|HIUH_SOYBN Hydroxyisourate hydrolase OS=Glycine max GN=HIUH PE=1 SV=1
cellular response to abiotic stimulus	Lus10030731.g	3.37	4.43	3.64	3.86	6.78	5.71	13.46	15.01	12.58	13.41	10.68	9.31	6.39	4.87	12.73	7.89	XP_010094543.1	putative protein phosphatase 2C 27 [Morus notabilis]	GO:0006470(protein dephosphorylation);GO:0061416(regulation of transcription from RNA polymerase II promoter in response to salt stress);GO:0009651(response to salt stress)	GO:0005737(cytoplasm);GO:0005634(nucleus)	GO:0004722(protein serine/threonine phosphatase activity);GO:0004721(phosphoprotein phosphatase activity);GO:0046872(metal ion binding);GO:0003824(catalytic activity);GO:0016787(hydrolase activity);GO:0043169(cation binding)	K14803|PTC2_3|http://www.genome.jp/dbget-bin/www_bget?ko:K14803	*	KOG0698(T)(Serine/threonine protein phosphatase)	sp|P93006|P2C27_ARATH	sp|P93006|P2C27_ARATH Probable protein phosphatase 2C 27 OS=Arabidopsis thaliana GN=PP2C27 PE=2 SV=1
cellular response to abiotic stimulus	Lus10037819.g	34.56	33.15	49.02	42.74	77.37	79.46	238.14	237.42	187.39	191.43	146.05	156.2	78.16	97.56	267.87	242.94	ADD54610.1	unknown, partial [Linum usitatissimum]	GO:0009785(blue light signaling pathway);GO:0010161(red light signaling pathway)	GO:0016021(integral component of membrane);GO:0016020(membrane);GO:0005634(nucleus)	*	*	*	*	sp|Q8VXU6|DI194_ARATH;sp|Q9FJ17|DI197_ARATH	sp|Q8VXU6|DI194_ARATH Protein DEHYDRATION-INDUCED 19 homolog 4 OS=Arabidopsis thaliana GN=DI19-4 PE=1 SV=1;sp|Q9FJ17|DI197_ARATH Protein DEHYDRATION-INDUCED 19 homolog 7 OS=Arabidopsis thaliana GN=DI19-7 PE=1 SV=2
cellular response to abiotic stimulus	Lus10038823.g	16.95	17.4	23.13	20.63	112.58	123.72	87.76	100.61	10.27	10.18	9.13	9.37	107.8	86.3	119.06	86.75	XP_002513587.1	PREDICTED: RNA polymerase sigma factor sigE, chloroplastic/mitochondrial [Ricinus communis]	GO:0006355(regulation of transcription, DNA-templated);GO:0006352(DNA-templated transcription, initiation);GO:0010207(photosystem II assembly);GO:2001141(regulation of RNA biosynthetic process);GO:0009658(chloroplast organization);GO:0045893(positive regulation of transcription, DNA-templated);GO:0010218(response to far red light);GO:0006351(transcription, DNA-templated);GO:0071483(cellular respo…	GO:0005739(mitochondrion);GO:0009507(chloroplast);GO:0009536(plastid)	GO:0003677(DNA binding);GO:0003700(transcription factor activity, sequence-specific DNA binding);GO:0016987(sigma factor activity);GO:0001053(plastid sigma factor activity);GO:0003899(DNA-directed 5'-3' RNA polymerase activity)	K03093|SIGMA70|http://www.genome.jp/dbget-bin/www_bget?ko:K03093	*	*	sp|Q9ZNX9|SIGE_ARATH	sp|Q9ZNX9|SIGE_ARATH RNA polymerase sigma factor sigE, chloroplastic/mitochondrial OS=Arabidopsis thaliana GN=SIGE PE=1 SV=1
DNA repair	Lus10000652.g	2.56	1.91	4.61	4.28	3.48	2.81	6.58	6.77	7.31	6.38	14	13.09	3.63	2.95	6.3	4.36	XP_012092547.1	PREDICTED: DNA repair helicase UVH6 isoform X2 [Jatropha curcas]	GO:0006289(nucleotide-excision repair);GO:0006139(nucleobase-containing compound metabolic process);GO:0009408(response to heat);GO:0006281(DNA repair);GO:0009411(response to UV)	GO:0005634(nucleus)	GO:0004003(ATP-dependent DNA helicase activity);GO:0003677(DNA binding);GO:0016818(hydrolase activity, acting on acid anhydrides, in phosphorus-containing anhydrides);GO:0008026(ATP-dependent helicase activity);GO:0003676(nucleic acid binding);GO:0005524(ATP binding);GO:0004386(helicase activity);GO:0000166(nucleotide binding);GO:0016787(hydrolase activity)	K10844|ERCC2, XPD|http://www.genome.jp/dbget-bin/www_bget?ko:K10844	ko03420(Nucleotide excision repair);ko03022(Basal transcription factors)	KOG1131(KL)(RNA polymerase II transcription initiation/nucleotide excision repair factor TFIIH, 5'-3' helicase subunit RAD3)	sp|Q8W4M7|ERCC2_ARATH	sp|Q8W4M7|ERCC2_ARATH DNA repair helicase XPD OS=Arabidopsis thaliana GN=XPD PE=1 SV=1
DNA repair	Lus10000685.g	5.68	6.81	7.45	5.23	7.37	9.45	11.77	14.9	21.51	14.29	13.13	15.56	11.69	11.01	19.61	20.65	XP_008219825.1	PREDICTED: endonuclease V isoform X1 [Prunus mume]	GO:0006281(DNA repair)	*	GO:0004519(endonuclease activity)	K05982|E3.1.21.7, nfi|http://www.genome.jp/dbget-bin/www_bget?ko:K05982	*	KOG4417(R)(Predicted endonuclease)	sp|Q8C9A2|ENDOV_MOUSE;sp|Q8N8Q3|ENDOV_HUMAN	sp|Q8C9A2|ENDOV_MOUSE Endonuclease V OS=Mus musculus GN=Endov PE=1 SV=2;sp|Q8N8Q3|ENDOV_HUMAN Endonuclease V OS=Homo sapiens GN=ENDOV PE=1 SV=1
DNA repair	Lus10000998.g	0.99	0.93	2.47	2.25	1.16	1.92	1.69	2.28	1.85	1.4	4.75	5.41	4.87	4.55	9.02	8.93	XP_016704803.1	PREDICTED: DNA repair endonuclease UVH1-like isoform X1 [Gossypium hirsutum]	GO:0006259(DNA metabolic process);GO:0006296(nucleotide-excision repair, DNA incision, 5'-to lesion);GO:1901255(nucleotide-excision repair involved in interstrand cross-link repair);GO:0000712(resolution of meiotic recombination intermediates);GO:0000724(double-strand break repair via homologous recombination)	GO:0000110(nucleotide-excision repair factor 1 complex)	GO:0003677(DNA binding);GO:0004518(nuclease activity);GO:0000014(single-stranded DNA endodeoxyribonuclease activity);GO:0003697(single-stranded DNA binding);GO:0003684(damaged DNA binding);GO:0004519(endonuclease activity)	K10848|ERCC4, XPF|http://www.genome.jp/dbget-bin/www_bget?ko:K10848	ko03420(Nucleotide excision repair)	KOG0442(L)(Structure-specific endonuclease ERCC1-XPF, catalytic component XPF/ERCC4)	sp|Q9LKI5|XPF_ARATH	sp|Q9LKI5|XPF_ARATH DNA repair endonuclease UVH1 OS=Arabidopsis thaliana GN=UVH1 PE=1 SV=2
DNA repair	Lus10002216.g	0.29	0.09	0.25	0.2	0.58	0.5	1.41	0.71	0.59	0.84	1.05	0.44	0.66	0.46	1.25	0.52	XP_012089813.1	PREDICTED: transcription factor bHLH140 [Jatropha curcas]	GO:0006281(DNA repair)	*	GO:0003824(catalytic activity);GO:0003677(DNA binding);GO:0033699(DNA 5'-adenosine monophosphate hydrolase activity)	K10863|APTX|http://www.genome.jp/dbget-bin/www_bget?ko:K10863	*	KOG0562(R)(Predicted hydrolase (HIT family))	sp|Q9M041|BH140_ARATH	sp|Q9M041|BH140_ARATH Transcription factor bHLH140 OS=Arabidopsis thaliana GN=BHLH140 PE=3 SV=1
DNA repair	Lus10004055.g	1.5	1.3	1.51	1.27	1.52	0.93	3.8	3.67	5.78	5.64	4.96	5.37	1.08	1.52	3.58	3.32	XP_002305874.2	hypothetical protein POPTR_0004s08580g [Populus trichocarpa]	GO:0006289(nucleotide-excision repair);GO:0006298(mismatch repair)	GO:0005737(cytoplasm);GO:0000111(nucleotide-excision repair factor 2 complex);GO:0009507(chloroplast);GO:0071942(XPC complex);GO:0005634(nucleus)	GO:0003677(DNA binding);GO:0003697(single-stranded DNA binding);GO:0003684(damaged DNA binding)	K10838|XPC|http://www.genome.jp/dbget-bin/www_bget?ko:K10838	ko03420(Nucleotide excision repair)	KOG2179(L)(Nucleotide excision repair complex XPC-HR23B, subunit XPC/DPB11)	sp|Q8W489|RAD4_ARATH	sp|Q8W489|RAD4_ARATH DNA repair protein RAD4 OS=Arabidopsis thaliana GN=RAD4 PE=1 SV=1
DNA repair	Lus10004462.g	1.72	2.01	1.17	1.54	4.55	5.85	6.46	5.35	3.32	6.31	3.73	3.84	3.21	3.51	5.45	5.79	XP_006382624.1	hypothetical protein POPTR_0005s03890g [Populus trichocarpa]	GO:0006294(nucleotide-excision repair, preincision complex assembly);GO:0010213(non-photoreactive DNA repair);GO:0010332(response to gamma radiation);GO:0006281(DNA repair);GO:0000724(double-strand break repair via homologous recombination);GO:0010224(response to UV-B)	GO:0005634(nucleus)	GO:0017108(5'-flap endonuclease activity);GO:0003684(damaged DNA binding);GO:0004519(endonuclease activity)	K10849|ERCC1|http://www.genome.jp/dbget-bin/www_bget?ko:K10849	ko03420(Nucleotide excision repair)	KOG2841(L)(Structure-specific endonuclease ERCC1-XPF, ERCC1 component)	sp|Q9MA98|ERCC1_ARATH	sp|Q9MA98|ERCC1_ARATH DNA excision repair protein ERCC-1 OS=Arabidopsis thaliana GN=ERCC1 PE=2 SV=1
DNA repair	Lus10004464.g	1.75	0.86	0.8	1.35	1.09	1.67	2.91	3.05	4.07	4.86	2.76	3.22	1.3	1.12	1.82	2.78	XP_018820830.1	PREDICTED: DNA repair protein XRCC3 homolog [Juglans regia]	GO:0006281(DNA repair);GO:0007131(reciprocal meiotic recombination);GO:0006302(double-strand break repair);GO:0006312(mitotic recombination);GO:0045003(double-strand break repair via synthesis-dependent strand annealing);GO:0042148(strand invasion);GO:0000707(meiotic DNA recombinase assembly);GO:0010212(response to ionizing radiation);GO:0007126(meiotic cell cycle)	GO:0033063(Rad51B-Rad51C-Rad51D-XRCC2 complex);GO:0005657(replication fork)	GO:0008094(DNA-dependent ATPase activity);GO:0003677(DNA binding);GO:0005524(ATP binding);GO:0003697(single-stranded DNA binding);GO:0004520(endodeoxyribonuclease activity);GO:0003690(double-stranded DNA binding);GO:0000150(recombinase activity);GO:0000400(four-way junction DNA binding)	K10880|XRCC3|http://www.genome.jp/dbget-bin/www_bget?ko:K10880	ko03440(Homologous recombination)	KOG1564(L)(DNA repair protein RHP57)	sp|Q9FKM5|XRCC3_ARATH	sp|Q9FKM5|XRCC3_ARATH DNA repair protein XRCC3 homolog OS=Arabidopsis thaliana GN=XRCC3 PE=1 SV=1
DNA repair	Lus10005743.g	0.12	0.15	0.09	0.05	0.2	0.23	0.51	0.43	0.64	0.61	0.67	0.53	0.06	0.12	0.25	0.41	XP_011048700.1	PREDICTED: DNA mismatch repair protein MSH3 [Populus euphratica]	GO:0006298(mismatch repair);GO:0007131(reciprocal meiotic recombination);GO:0000710(meiotic mismatch repair)	GO:0016021(integral component of membrane);GO:0016020(membrane);GO:0032300(mismatch repair complex);GO:0000228(nuclear chromosome)	GO:0005524(ATP binding);GO:0030983(mismatched DNA binding);GO:0003684(damaged DNA binding)	K08736|MSH3|http://www.genome.jp/dbget-bin/www_bget?ko:K08736	ko03430(Mismatch repair)	KOG0217(L)(Mismatch repair ATPase MSH6 (MutS family))	sp|O65607|MSH3_ARATH	sp|O65607|MSH3_ARATH DNA mismatch repair protein MSH3 OS=Arabidopsis thaliana GN=MSH3 PE=1 SV=2
DNA repair	Lus10005783.g	0.84	0.9	0.95	0.71	3.19	2.83	9.51	10.49	5.2	6.37	4.04	3.98	3.86	2.73	9.12	6.83	BAF03493.1	Ku70 homolog [Populus nigra]	GO:0071480(cellular response to gamma radiation);GO:0006310(DNA recombination);GO:0071481(cellular response to X-ray);GO:0000723(telomere maintenance);GO:0006303(double-strand break repair via nonhomologous end joining);GO:0032508(DNA duplex unwinding)	GO:0043564(Ku70:Ku80 complex);GO:0000784(nuclear chromosome, telomeric region);GO:0005634(nucleus)	GO:0004003(ATP-dependent DNA helicase activity);GO:0003677(DNA binding);GO:0003690(double-stranded DNA binding);GO:0042162(telomeric DNA binding);GO:0003684(damaged DNA binding);GO:0004386(helicase activity)	K10884|XRCC6, KU70, G22P1|http://www.genome.jp/dbget-bin/www_bget?ko:K10884	ko03450(Non-homologous end-joining)	KOG2327(L)(DNA-binding subunit of a DNA-dependent protein kinase (Ku70 autoantigen))	sp|Q7F1M0|KU70_ORYSJ;sp|Q9FQ08|KU70_ARATH	sp|Q7F1M0|KU70_ORYSJ ATP-dependent DNA helicase 2 subunit KU70 OS=Oryza sativa subsp. japonica GN=KU70 PE=1 SV=1;sp|Q9FQ08|KU70_ARATH ATP-dependent DNA helicase 2 subunit KU70 OS=Arabidopsis thaliana GN=KU70 PE=1 SV=1
DNA repair	Lus10005821.g	2.52	1.37	3.2	2.82	4.05	5.16	4.95	8.95	7.31	6.24	9.01	7.58	4.57	6.17	6.52	7.96	OAY27406.1	hypothetical protein MANES_16G123500 [Manihot esculenta]	GO:0016567(protein ubiquitination);GO:0006281(DNA repair);GO:0009058(biosynthetic process);GO:0008152(metabolic process)	GO:0000151(ubiquitin ligase complex)	GO:0004842(ubiquitin-protein transferase activity);GO:0043130(ubiquitin binding);GO:0003824(catalytic activity);GO:0030170(pyridoxal phosphate binding);GO:0016597(amino acid binding)	*	*	*	*	*
DNA repair	Lus10006818.g	0.99	1.19	1.03	1.59	3.56	5.05	7.45	9	8.04	4.41	3.53	4.73	4.79	4.8	11.55	9.99	BAF03493.1	Ku70 homolog [Populus nigra]	GO:0071480(cellular response to gamma radiation);GO:0006310(DNA recombination);GO:0071481(cellular response to X-ray);GO:0000723(telomere maintenance);GO:0006303(double-strand break repair via nonhomologous end joining);GO:0032508(DNA duplex unwinding)	GO:0043564(Ku70:Ku80 complex);GO:0000784(nuclear chromosome, telomeric region);GO:0005634(nucleus)	GO:0004003(ATP-dependent DNA helicase activity);GO:0003677(DNA binding);GO:0003690(double-stranded DNA binding);GO:0042162(telomeric DNA binding);GO:0003684(damaged DNA binding);GO:0004386(helicase activity)	K10884|XRCC6, KU70, G22P1|http://www.genome.jp/dbget-bin/www_bget?ko:K10884	ko03450(Non-homologous end-joining)	KOG2327(L)(DNA-binding subunit of a DNA-dependent protein kinase (Ku70 autoantigen))	sp|Q7F1M0|KU70_ORYSJ	sp|Q7F1M0|KU70_ORYSJ ATP-dependent DNA helicase 2 subunit KU70 OS=Oryza sativa subsp. japonica GN=KU70 PE=1 SV=1
DNA repair	Lus10006998.g	4.5	7.27	6.69	6.97	9.75	7.15	21.3	21.53	22.2	21.84	16	18.17	11.63	5.6	16.11	16.59	XP_017972195.1	PREDICTED: RNA polymerase II transcription factor B subunit 5 [Theobroma cacao]	GO:0006289(nucleotide-excision repair);GO:0006355(regulation of transcription, DNA-templated)	GO:0000439(core TFIIH complex)	*	K10845|TTDA, GTF2H5, TFB5|http://www.genome.jp/dbget-bin/www_bget?ko:K10845	ko03420(Nucleotide excision repair);ko03022(Basal transcription factors)	*	sp|Q6NNM0|TFB5_ARATH	sp|Q6NNM0|TFB5_ARATH RNA polymerase II transcription factor B subunit 5 OS=Arabidopsis thaliana GN=TFB5 PE=3 SV=1
DNA repair	Lus10007365.g	2.37	2.53	1.64	2.07	1.52	1.96	4.47	3.94	5.48	5.58	5.75	5.74	1.99	2.15	4.62	4.13	XP_012084677.1	PREDICTED: nijmegen breakage syndrome 1 protein [Jatropha curcas]	GO:0006974(cellular response to DNA damage stimulus);GO:0007131(reciprocal meiotic recombination);GO:0007129(synapsis);GO:0006312(mitotic recombination);GO:0000724(double-strand break repair via homologous recombination);GO:0016233(telomere capping);GO:0007095(mitotic G2 DNA damage checkpoint);GO:0042770(signal transduction in response to DNA damage);GO:0032508(DNA duplex unwinding)	GO:0030870(Mre11 complex);GO:0000784(nuclear chromosome, telomeric region)	GO:0004003(ATP-dependent DNA helicase activity);GO:0003684(damaged DNA binding)	K10867|NBN, NBS1|http://www.genome.jp/dbget-bin/www_bget?ko:K10867	ko03440(Homologous recombination)	*	sp|Q0H8D7|NBS1_ARATH	sp|Q0H8D7|NBS1_ARATH Nijmegen breakage syndrome 1 protein OS=Arabidopsis thaliana GN=NBS1 PE=1 SV=1
DNA repair	Lus10007489.g	0.28	0.37	0.83	0.18	0.68	0.73	1.08	1.36	1.17	1.61	1.94	0.84	0.64	0.67	1.75	1.19	XP_017634256.1	PREDICTED: DNA mismatch repair protein MSH4 [Gossypium arboreum]	GO:0006298(mismatch repair)	*	GO:0005524(ATP binding);GO:0030983(mismatched DNA binding)	K08740|MSH4|http://www.genome.jp/dbget-bin/www_bget?ko:K08740	*	KOG0217(L)(Mismatch repair ATPase MSH6 (MutS family))	sp|F4JP48|MSH4_ARATH	sp|F4JP48|MSH4_ARATH DNA mismatch repair protein MSH4 OS=Arabidopsis thaliana GN=MSH4 PE=2 SV=1
DNA repair	Lus10007866.g	2.22	2.74	2.76	2.23	5.56	6.14	7.13	7.05	8.23	7.15	7.06	6.36	6.54	4.7	7.63	7.33	XP_002321013.1	DNA mismatch repair family protein [Populus trichocarpa]	GO:0006310(DNA recombination);GO:0010154(fruit development);GO:0048316(seed development);GO:0009555(pollen development);GO:0006298(mismatch repair)	GO:0032389(MutLalpha complex);GO:0032300(mismatch repair complex)	GO:0030983(mismatched DNA binding);GO:0003697(single-stranded DNA binding);GO:0005524(ATP binding);GO:0016887(ATPase activity)	K10858|PMS2|http://www.genome.jp/dbget-bin/www_bget?ko:K10858	ko03430(Mismatch repair)	KOG1978(L)(DNA mismatch repair protein - MLH2/PMS1/Pms2 family)	sp|Q941I6|PMS1_ARATH	sp|Q941I6|PMS1_ARATH DNA mismatch repair protein PMS1 OS=Arabidopsis thaliana GN=PMS1 PE=1 SV=1
DNA repair	Lus10011024.g	1.47	1.65	1.19	1.06	3.57	2.99	4.62	6.6	2.99	2.45	1.72	2.04	5.78	5.8	3.35	3.23	OAY60154.1	hypothetical protein MANES_01G089700 [Manihot esculenta]	GO:0006259(DNA metabolic process);GO:0006289(nucleotide-excision repair);GO:0006296(nucleotide-excision repair, DNA incision, 5'-to lesion);GO:1901255(nucleotide-excision repair involved in interstrand cross-link repair);GO:0000712(resolution of meiotic recombination intermediates);GO:0006979(response to oxidative stress);GO:0000724(double-strand break repair via homologous recombination)	GO:0000110(nucleotide-excision repair factor 1 complex)	GO:0003677(DNA binding);GO:0004518(nuclease activity);GO:0000014(single-stranded DNA endodeoxyribonuclease activity);GO:0003697(single-stranded DNA binding);GO:0003684(damaged DNA binding)	K10848|ERCC4, XPF|http://www.genome.jp/dbget-bin/www_bget?ko:K10848	ko03420(Nucleotide excision repair)	KOG0442(L)(Structure-specific endonuclease ERCC1-XPF, catalytic component XPF/ERCC4)	sp|Q9LKI5|XPF_ARATH	sp|Q9LKI5|XPF_ARATH DNA repair endonuclease UVH1 OS=Arabidopsis thaliana GN=UVH1 PE=1 SV=2
DNA repair	Lus10012849.g	4.46	5.1	5.96	4.42	7.32	7.44	11.81	14.27	15.92	15.98	11.71	11.69	8.51	10.05	14.75	13.82	XP_012091582.1	PREDICTED: general transcription factor IIH subunit 4 [Jatropha curcas]	GO:0006289(nucleotide-excision repair);GO:0070816(phosphorylation of RNA polymerase II C-terminal domain);GO:0006974(cellular response to DNA damage stimulus);GO:0006351(transcription, DNA-templated);GO:0006355(regulation of transcription, DNA-templated);GO:0006281(DNA repair)	GO:0000439(core TFIIH complex);GO:0005634(nucleus);GO:0005675(holo TFIIH complex)	GO:0004003(ATP-dependent DNA helicase activity);GO:0008353(RNA polymerase II carboxy-terminal domain kinase activity);GO:0003700(transcription factor activity, sequence-specific DNA binding);GO:0003690(double-stranded DNA binding)	K03144|TFIIH4, GTF2H4, TFB2|http://www.genome.jp/dbget-bin/www_bget?ko:K03144	ko03420(Nucleotide excision repair);ko03022(Basal transcription factors)	KOG3471(KL)(RNA polymerase II transcription initiation/nucleotide excision repair factor TFIIH, subunit TFB2)	sp|Q680U9|TFB2_ARATH	sp|Q680U9|TFB2_ARATH RNA polymerase II transcription factor B subunit 2 OS=Arabidopsis thaliana GN=TFB2 PE=2 SV=1
DNA repair	Lus10014462.g	1.82	1.73	1.09	1.01	1.24	1.01	2.99	3.11	4.13	3.88	3.66	4.15	0.85	0.53	2.11	1.93	XP_011041450.1	PREDICTED: DNA mismatch repair protein MSH1, mitochondrial isoform X1 [Populus euphratica]	GO:0006298(mismatch repair);GO:0007131(reciprocal meiotic recombination);GO:0000710(meiotic mismatch repair)	GO:0032300(mismatch repair complex);GO:0000228(nuclear chromosome)	GO:0030983(mismatched DNA binding);GO:0005524(ATP binding);GO:0003684(damaged DNA binding)	*	*	KOG0217(L)(Mismatch repair ATPase MSH6 (MutS family))	sp|Q84LK0|MSH1_ARATH	sp|Q84LK0|MSH1_ARATH DNA mismatch repair protein MSH1, mitochondrial OS=Arabidopsis thaliana GN=MSH1 PE=1 SV=1
DNA repair	Lus10015220.g	3.27	3.75	5.36	3.8	4.74	7.02	13.93	11.74	13.01	14.7	11.47	13.63	5.14	6.62	9.39	13.69	XP_002531104.1	PREDICTED: DNA repair protein RAD51 homolog 4 isoform X2 [Ricinus communis]	GO:0006281(DNA repair);GO:0007131(reciprocal meiotic recombination);GO:0006312(mitotic recombination);GO:0042148(strand invasion);GO:0000707(meiotic DNA recombinase assembly);GO:0010212(response to ionizing radiation)	GO:0033063(Rad51B-Rad51C-Rad51D-XRCC2 complex);GO:0005657(replication fork)	GO:0008094(DNA-dependent ATPase activity);GO:0003677(DNA binding);GO:0005524(ATP binding);GO:0003697(single-stranded DNA binding);GO:0004520(endodeoxyribonuclease activity);GO:0003690(double-stranded DNA binding);GO:0000150(recombinase activity);GO:0000400(four-way junction DNA binding)	K10871|RAD51L3, RAD51D|http://www.genome.jp/dbget-bin/www_bget?ko:K10871	ko03440(Homologous recombination)	KOG1564(L)(DNA repair protein RHP57)	sp|Q9LQQ2|RA51D_ARATH	sp|Q9LQQ2|RA51D_ARATH DNA repair protein RAD51 homolog 4 OS=Arabidopsis thaliana GN=RAD51D PE=2 SV=2
DNA repair	Lus10015505.g	0.76	1.14	0.41	0.27	0.6	0.28	0.57	0.86	2.26	1.04	1.19	0.94	1	0.92	1.4	1.59	XP_015582002.1	PREDICTED: replication protein A 32 kDa subunit B isoform X1 [Ricinus communis]	GO:0006310(DNA recombination);GO:0006281(DNA repair);GO:0006260(DNA replication)	GO:0005634(nucleus)	GO:0003677(DNA binding);GO:0003676(nucleic acid binding)	K10739|RFA2, RPA2|http://www.genome.jp/dbget-bin/www_bget?ko:K10739	ko03030(DNA replication);ko03440(Homologous recombination);ko03430(Mismatch repair);ko03420(Nucleotide excision repair)	*	sp|Q8LFJ8|RFA2B_ARATH	sp|Q8LFJ8|RFA2B_ARATH Replication protein A 32 kDa subunit B OS=Arabidopsis thaliana GN=RPA2B PE=2 SV=1
DNA repair	Lus10015868.g	0.35	0.41	0.73	0.39	0.33	0.55	1.96	2.58	3.13	2.34	2.79	2.49	0.78	0.54	2.05	2.12	XP_002320725.2	Ku80 family protein [Populus trichocarpa]	GO:0071480(cellular response to gamma radiation);GO:0006974(cellular response to DNA damage stimulus);GO:0006310(DNA recombination);GO:0006281(DNA repair);GO:0071481(cellular response to X-ray);GO:0000723(telomere maintenance);GO:0006303(double-strand break repair via nonhomologous end joining);GO:0032508(DNA duplex unwinding);GO:0006302(double-strand break repair)	GO:0043564(Ku70:Ku80 complex);GO:0000784(nuclear chromosome, telomeric region);GO:0005634(nucleus)	GO:0004003(ATP-dependent DNA helicase activity);GO:0003677(DNA binding);GO:0005524(ATP binding);GO:0003690(double-stranded DNA binding);GO:0004386(helicase activity);GO:0042162(telomeric DNA binding);GO:0000166(nucleotide binding);GO:0016817(hydrolase activity, acting on acid anhydrides);GO:0016787(hydrolase activity);GO:0003684(damaged DNA binding)	K10885|XRCC5, KU80, G22P2|http://www.genome.jp/dbget-bin/www_bget?ko:K10885	ko03450(Non-homologous end-joining)	KOG2326(L)(DNA-binding subunit of a DNA-dependent protein kinase (Ku80 autoantigen))	sp|Q9FQ09|KU80_ARATH	sp|Q9FQ09|KU80_ARATH ATP-dependent DNA helicase 2 subunit KU80 OS=Arabidopsis thaliana GN=KU80 PE=1 SV=1
DNA repair	Lus10015968.g	2.39	4.48	5.65	3.43	3.98	4.47	8.3	10.5	11.6	11.64	9.86	8.47	4.33	4.59	10.21	8.82	XP_018850217.1	PREDICTED: E3 SUMO-protein ligase MMS21 [Juglans regia]	GO:0000724(double-strand break repair via homologous recombination);GO:0080038(positive regulation of cytokinin-activated signaling pathway);GO:0045931(positive regulation of mitotic cell cycle);GO:0016925(protein sumoylation);GO:0006974(cellular response to DNA damage stimulus);GO:0008284(positive regulation of cell proliferation);GO:0010082(regulation of root meristem growth);GO:0032876(negativ…	GO:0030915(Smc5-Smc6 complex);GO:0005634(nucleus);GO:0005737(cytoplasm)	GO:0008270(zinc ion binding);GO:0019789(SUMO transferase activity);GO:0046872(metal ion binding);GO:0016874(ligase activity);GO:0005515(protein binding)	*	*	*	sp|Q8GYH7|NSE2_ARATH	sp|Q8GYH7|NSE2_ARATH E3 SUMO-protein ligase MMS21 OS=Arabidopsis thaliana GN=MMS21 PE=1 SV=1
DNA repair	Lus10016643.g	2.29	2.24	1.41	1.77	1.74	1.56	8	2.18	4.35	7.02	4.55	6.68	2.46	1.53	5.56	4.58	XP_018844064.1	PREDICTED: DNA repair protein RAD50 [Juglans regia]	GO:0000723(telomere maintenance);GO:0006281(DNA repair);GO:0090305(nucleic acid phosphodiester bond hydrolysis);GO:0007131(reciprocal meiotic recombination);GO:0000722(telomere maintenance via recombination);GO:0006302(double-strand break repair);GO:0007004(telomere maintenance via telomerase);GO:0016233(telomere capping);GO:0070192(chromosome organization involved in meiotic cell cycle);GO:00063…	GO:0030870(Mre11 complex);GO:0005634(nucleus);GO:0005737(cytoplasm);GO:0035861(site of double-strand break);GO:0000794(condensed nuclear chromosome);GO:0000790(nuclear chromatin);GO:0000784(nuclear chromosome, telomeric region)	GO:0016887(ATPase activity);GO:0004003(ATP-dependent DNA helicase activity);GO:0003691(double-stranded telomeric DNA binding);GO:0043047(single-stranded telomeric DNA binding);GO:0000014(single-stranded DNA endodeoxyribonuclease activity);GO:0004017(adenylate kinase activity);GO:0051880(G-quadruplex DNA binding);GO:0008408(3'-5' exonuclease activity)	K10866|RAD50|http://www.genome.jp/dbget-bin/www_bget?ko:K10866	ko03440(Homologous recombination);ko03450(Non-homologous end-joining)	KOG0962(L)(DNA repair protein RAD50, ABC-type ATPase/SMC superfamily)	sp|Q9SL02|RAD50_ARATH	sp|Q9SL02|RAD50_ARATH DNA repair protein RAD50 OS=Arabidopsis thaliana GN=RAD50 PE=1 SV=2
DNA repair	Lus10016644.g	4.03	3.19	5.17	5.01	2.82	6.72	13.33	12.41	16.12	18.18	15.32	15.71	6.49	5.6	17.69	17.91	XP_002300148.1	DNA repair-recombination family protein [Populus trichocarpa]	GO:0090305(nucleic acid phosphodiester bond hydrolysis);GO:0007131(reciprocal meiotic recombination);GO:0000722(telomere maintenance via recombination);GO:0006302(double-strand break repair);GO:0007004(telomere maintenance via telomerase);GO:0006281(DNA repair);GO:0016233(telomere capping);GO:0070192(chromosome organization involved in meiotic cell cycle);GO:0006312(mitotic recombination);GO:0000…	GO:0005737(cytoplasm);GO:0035861(site of double-strand break);GO:0000794(condensed nuclear chromosome);GO:0000790(nuclear chromatin);GO:0030870(Mre11 complex);GO:0000784(nuclear chromosome, telomeric region);GO:0005634(nucleus)	GO:0004003(ATP-dependent DNA helicase activity);GO:0003691(double-stranded telomeric DNA binding);GO:0043047(single-stranded telomeric DNA binding);GO:0000014(single-stranded DNA endodeoxyribonuclease activity);GO:0004017(adenylate kinase activity);GO:0051880(G-quadruplex DNA binding);GO:0008408(3'-5' exonuclease activity);GO:0016887(ATPase activity)	K10866|RAD50|http://www.genome.jp/dbget-bin/www_bget?ko:K10866	ko03440(Homologous recombination);ko03450(Non-homologous end-joining)	KOG0962(L)(DNA repair protein RAD50, ABC-type ATPase/SMC superfamily)	sp|Q9SL02|RAD50_ARATH	sp|Q9SL02|RAD50_ARATH DNA repair protein RAD50 OS=Arabidopsis thaliana GN=RAD50 PE=1 SV=2
DNA repair	Lus10016691.g	0.24	0.51	0.49	0.27	0.24	0.29	0.94	0.64	0.95	1.08	1.04	0.75	0.17	0.52	1.47	0.99	XP_011022188.1	PREDICTED: DNA mismatch repair protein MLH3 isoform X5 [Populus euphratica]	GO:0007131(reciprocal meiotic recombination);GO:0006298(mismatch repair)	GO:0032300(mismatch repair complex)	GO:0005524(ATP binding)	K08739|MLH3|http://www.genome.jp/dbget-bin/www_bget?ko:K08739	ko03430(Mismatch repair)	KOG1978(L)(DNA mismatch repair protein - MLH2/PMS1/Pms2 family)	sp|F4JN26|MLH3_ARATH	sp|F4JN26|MLH3_ARATH DNA mismatch repair protein MLH3 OS=Arabidopsis thaliana GN=MLH3 PE=2 SV=2
DNA repair	Lus10017724.g	0.54	0.52	0.46	0.52	0.95	1.03	2.66	1.8	1.67	2.16	1.47	1.99	0.92	0.87	1.73	2.33	XP_012076663.1	PREDICTED: DNA mismatch repair protein MSH7 [Jatropha curcas]	GO:0006298(mismatch repair);GO:0045910(negative regulation of DNA recombination);GO:0007131(reciprocal meiotic recombination);GO:0000710(meiotic mismatch repair);GO:0043570(maintenance of DNA repeat elements);GO:0009411(response to UV)	GO:0032301(MutSalpha complex);GO:0000228(nuclear chromosome)	GO:0030983(mismatched DNA binding);GO:0005524(ATP binding);GO:0032137(guanine/thymine mispair binding);GO:0000400(four-way junction DNA binding);GO:0003684(damaged DNA binding);GO:0032138(single base insertion or deletion binding)	K08737|MSH6|http://www.genome.jp/dbget-bin/www_bget?ko:K08737	ko03430(Mismatch repair)	KOG0217(L)(Mismatch repair ATPase MSH6 (MutS family))	sp|Q9SMV7|MSH7_ARATH	sp|Q9SMV7|MSH7_ARATH DNA mismatch repair protein MSH7 OS=Arabidopsis thaliana GN=MSH7 PE=1 SV=1
DNA repair	Lus10019348.g	6.91	10.29	16.77	10.91	41.57	33.26	73.36	50.29	45.69	42.6	53.38	41.61	86.35	85.58	101.03	71.64	XP_006425894.1	hypothetical protein CICLE_v10026058mg [Citrus clementina]	GO:0006355(regulation of transcription, DNA-templated);GO:0006310(DNA recombination);GO:0006302(double-strand break repair);GO:0045892(negative regulation of transcription, DNA-templated)	GO:0005634(nucleus)	GO:0003677(DNA binding);GO:0003700(transcription factor activity, sequence-specific DNA binding);GO:0043565(sequence-specific DNA binding)	K09419|HSFF|http://www.genome.jp/dbget-bin/www_bget?ko:K09419	*	KOG0627(K)(Heat shock transcription factor)	sp|P22335|HSF24_SOLPE	sp|P22335|HSF24_SOLPE Heat shock factor protein HSF24 OS=Solanum peruvianum GN=HSF24 PE=2 SV=1
DNA repair	Lus10019539.g	0	0	0	0	0.04	0	1.3	1.84	0.4	0.13	0.24	0.14	0.07	0	1.56	0.47	KDP37595.1	hypothetical protein JCGZ_07941 [Jatropha curcas]	GO:0006471(protein ADP-ribosylation);GO:0055114(oxidation-reduction process);GO:0051103(DNA ligation involved in DNA repair);GO:0006273(lagging strand elongation)	GO:0005737(cytoplasm)	GO:0016740(transferase activity);GO:0016491(oxidoreductase activity);GO:0016757(transferase activity, transferring glycosyl groups);GO:0003950(NAD+ ADP-ribosyltransferase activity);GO:0003910(DNA ligase (ATP) activity)	K10798|PARP|http://www.genome.jp/dbget-bin/www_bget?ko:K10798	ko03410(Base excision repair)	KOG1037(KLO)(NAD+ ADP-ribosyltransferase Parp, required for poly-ADP ribosylation of nuclear proteins)	sp|Q9SWB4|PARP3_SOYBN	sp|Q9SWB4|PARP3_SOYBN Poly [ADP-ribose] polymerase 3 OS=Glycine max GN=PARP3 PE=2 SV=1
DNA repair	Lus10020862.g	0.87	0.56	0.42	0.4	0.69	0.53	1.56	1.39	2.46	2.49	1.37	1.57	0.47	0.44	1.03	1.37	XP_012086374.1	PREDICTED: DNA polymerase delta catalytic subunit [Jatropha curcas]	GO:0006260(DNA replication);GO:0045004(DNA replication proofreading);GO:0006287(base-excision repair, gap-filling);GO:0006297(nucleotide-excision repair, DNA gap filling)	GO:0043625(delta DNA polymerase complex)	GO:0003677(DNA binding);GO:0016740(transferase activity);GO:0003887(DNA-directed DNA polymerase activity);GO:0008408(3'-5' exonuclease activity);GO:0000166(nucleotide binding);GO:0003676(nucleic acid binding);GO:0016779(nucleotidyltransferase activity);GO:0008296(3'-5'-exodeoxyribonuclease activity)	K02327|POLD1|http://www.genome.jp/dbget-bin/www_bget?ko:K02327	ko03410(Base excision repair);ko03030(DNA replication);ko03440(Homologous recombination);ko03430(Mismatch repair);ko03420(Nucleotide excision repair);ko00230(Purine metabolism);ko00240(Pyrimidine metabolism)	KOG0969(L)(DNA polymerase delta, catalytic subunit)	sp|Q9LRE6|DPOD1_ORYSJ;sp|O48901|DPOD1_SOYBN	sp|Q9LRE6|DPOD1_ORYSJ DNA polymerase delta catalytic subunit OS=Oryza sativa subsp. japonica GN=POLD1 PE=2 SV=1;sp|O48901|DPOD1_SOYBN DNA polymerase delta catalytic subunit OS=Glycine max GN=POLD1 PE=2 SV=1
DNA repair	Lus10020878.g	4.95	5.24	1.62	3.21	6.92	4.73	9.94	9.56	4.06	2.94	2.36	2.38	6.66	5.75	10.54	8.73	XP_015580130.1	PREDICTED: cryptochrome DASH, chloroplastic/mitochondrial [Ricinus communis]	GO:0006281(DNA repair)	*	GO:0003913(DNA photolyase activity)	K01669|phrB|http://www.genome.jp/dbget-bin/www_bget?ko:K01669	*	KOG0133(LT)(Deoxyribodipyrimidine photolyase/cryptochrome)	sp|Q84KJ5|CRYD_ARATH	sp|Q84KJ5|CRYD_ARATH Cryptochrome DASH, chloroplastic/mitochondrial OS=Arabidopsis thaliana GN=CRYD PE=1 SV=2
DNA repair	Lus10021220.g	2.04	1.53	2.57	1.03	2.65	3.67	4.21	4.55	6.84	4.08	3.97	5.47	3.54	3.05	6.72	5.43	XP_012075784.1	PREDICTED: DNA repair protein XRCC4 [Jatropha curcas]	GO:0006310(DNA recombination);GO:0006302(double-strand break repair)	GO:0005634(nucleus)	GO:0003677(DNA binding)	K10886|XRCC4|http://www.genome.jp/dbget-bin/www_bget?ko:K10886	ko03450(Non-homologous end-joining)	*	sp|Q682V0|XRCC4_ARATH	sp|Q682V0|XRCC4_ARATH DNA repair protein XRCC4 OS=Arabidopsis thaliana GN=XRCC4 PE=1 SV=2
DNA repair	Lus10021585.g	2.15	2.03	2.64	2.19	1.8	2.29	10.91	8.72	9.71	9.5	11.33	11.89	2.53	1.4	8.56	8.29	XP_002514123.2	PREDICTED: LOW QUALITY PROTEIN: DNA repair protein recA homolog 3, mitochondrial [Ricinus communis]	GO:0006259(DNA metabolic process);GO:0006974(cellular response to DNA damage stimulus);GO:0006310(DNA recombination);GO:0006281(DNA repair);GO:0006312(mitotic recombination);GO:0042148(strand invasion);GO:0000730(DNA recombinase assembly);GO:0010212(response to ionizing radiation)	*	GO:0008094(DNA-dependent ATPase activity);GO:0003677(DNA binding);GO:0003697(single-stranded DNA binding);GO:0005524(ATP binding);GO:0004520(endodeoxyribonuclease activity);GO:0003690(double-stranded DNA binding);GO:0000150(recombinase activity);GO:0000400(four-way junction DNA binding);GO:0000166(nucleotide binding)	K03553|recA|http://www.genome.jp/dbget-bin/www_bget?ko:K03553	ko03440(Homologous recombination)	*	sp|Q9ZUP2|RECA3_ARATH	sp|Q9ZUP2|RECA3_ARATH DNA repair protein recA homolog 3, mitochondrial OS=Arabidopsis thaliana GN=At2g19490 PE=2 SV=2
DNA repair	Lus10021650.g	0.39	0.33	0.57	0.45	0.77	0.71	2.28	2.62	2.89	2.68	1.61	2.16	0.65	0.52	2.19	1.99	XP_011040863.1	PREDICTED: SWR1-complex protein 4-like [Populus euphratica]	GO:0045892(negative regulation of transcription, DNA-templated);GO:0043968(histone H2A acetylation);GO:0006281(DNA repair);GO:0006338(chromatin remodeling);GO:0043967(histone H4 acetylation);GO:0032259(methylation)	GO:0035267(NuA4 histone acetyltransferase complex);GO:0000812(Swr1 complex);GO:0005634(nucleus)	GO:0003677(DNA binding);GO:0003714(transcription corepressor activity);GO:0016740(transferase activity);GO:0008168(methyltransferase activity)	K11324|DMAP1, SWC4, EAF2|http://www.genome.jp/dbget-bin/www_bget?ko:K11324	*	KOG2656(BK)(DNA methyltransferase 1-associated protein-1)	sp|Q8VZL6|SWC4_ARATH	sp|Q8VZL6|SWC4_ARATH SWR1-complex protein 4 OS=Arabidopsis thaliana GN=SWC4 PE=1 SV=1
DNA repair	Lus10022440.g	0.88	0.47	0.44	0.23	0.9	0.74	0.75	1.44	1.49	1	1.94	1.16	0.65	1.25	1.42	1.54	XP_012090654.1	PREDICTED: recQ-mediated genome instability protein 1 [Jatropha curcas]	GO:0000724(double-strand break repair via homologous recombination);GO:0007126(meiotic cell cycle)	*	GO:0000166(nucleotide binding)	K10990|RMI1, BRAP75|http://www.genome.jp/dbget-bin/www_bget?ko:K10990	*	KOG3683(S)(Uncharacterized conserved protein)	sp|Q5XUX6|RMI1_ARATH	sp|Q5XUX6|RMI1_ARATH RecQ-mediated genome instability protein 1 OS=Arabidopsis thaliana GN=RMI1 PE=1 SV=1
DNA repair	Lus10022650.g	2.35	1.43	1.39	1.88	2.28	2.14	3.94	4.21	6.46	3.76	3.91	5.15	2.92	3.85	4.29	6.1	XP_011046616.1	PREDICTED: F-box protein SKIP23-like [Populus euphratica]	GO:0006310(DNA recombination);GO:0006302(double-strand break repair);GO:0006284(base-excision repair);GO:0006260(DNA replication);GO:0032508(DNA duplex unwinding)	GO:0005737(cytoplasm);GO:0005694(chromosome);GO:0005634(nucleus)	GO:0003677(DNA binding);GO:0009378(four-way junction helicase activity);GO:0043140(ATP-dependent 3'-5' DNA helicase activity)	*	*	*	sp|Q3EBZ2|SKI23_ARATH	sp|Q3EBZ2|SKI23_ARATH F-box protein SKIP23 OS=Arabidopsis thaliana GN=SKIP23 PE=1 SV=1
DNA repair	Lus10022895.g	0.22	0	0.03	0.05	0.49	0.39	0.75	0.83	0.35	0.34	0.4	0.19	0.25	0.27	0.49	0.48	XP_012085262.1	PREDICTED: protein BREAST CANCER SUSCEPTIBILITY 1 homolog [Jatropha curcas]	GO:0065004(protein-DNA complex assembly);GO:0048366(leaf development);GO:0042127(regulation of cell proliferation);GO:0045892(negative regulation of transcription, DNA-templated);GO:0006974(cellular response to DNA damage stimulus);GO:0045717(negative regulation of fatty acid biosynthetic process);GO:0035067(negative regulation of histone acetylation);GO:0045944(positive regulation of transcripti…	GO:0070531(BRCA1-A complex);GO:0005886(plasma membrane);GO:0031436(BRCA1-BARD1 complex)	GO:0004842(ubiquitin-protein transferase activity);GO:0008270(zinc ion binding);GO:0046872(metal ion binding)	K10683|BARD1|http://www.genome.jp/dbget-bin/www_bget?ko:K10683	ko03440(Homologous recombination)	*	sp|F4I443|BARD1_ARATH	sp|F4I443|BARD1_ARATH BRCA1-associated RING domain protein 1 OS=Arabidopsis thaliana GN=BARD1 PE=1 SV=1
DNA repair	Lus10023694.g	3.13	3.73	4.2	3.59	8.87	7.53	15.21	11.4	10.58	13.17	11.48	11.61	8.58	6.54	16.11	11.88	OAY28185.1	hypothetical protein MANES_15G048200 [Manihot esculenta]	GO:0006281(DNA repair);GO:0071139(resolution of recombination intermediates);GO:0009908(flower development);GO:0048826(cotyledon morphogenesis);GO:0048316(seed development);GO:0051781(positive regulation of cell division);GO:0010091(trichome branching);GO:0009965(leaf morphogenesis);GO:0006355(regulation of transcription, DNA-templated)	GO:0030915(Smc5-Smc6 complex);GO:0005829(cytosol);GO:0005634(nucleus)	*	*	*	*	*	*
DNA repair	Lus10023805.g	0.55	0.8	0.08	0.1	0.72	0.51	2.03	1.4	2.31	1.63	1	1.11	0.72	0.66	1.1	0.98	XP_012070498.1	PREDICTED: replication protein A 70 kDa DNA-binding subunit E [Jatropha curcas]	GO:0006310(DNA recombination);GO:0006281(DNA repair);GO:0006260(DNA replication)	GO:0005634(nucleus)	GO:0003677(DNA binding);GO:0003676(nucleic acid binding);GO:0008270(zinc ion binding);GO:0046872(metal ion binding)	K07466|RFA1, RPA1, rpa|http://www.genome.jp/dbget-bin/www_bget?ko:K07466	ko03030(DNA replication);ko03440(Homologous recombination);ko03430(Mismatch repair);ko03420(Nucleotide excision repair)	KOG4400(O)(E3 ubiquitin ligase interacting with arginine methyltransferase)	sp|Q9FHJ6|RFA1C_ARATH	sp|Q9FHJ6|RFA1C_ARATH Replication protein A 70 kDa DNA-binding subunit C OS=Arabidopsis thaliana GN=RPA1C PE=3 SV=1
DNA repair	Lus10023991.g	0.64	0.55	0.3	0.25	0.32	0.24	1.2	0.5	1.21	1.22	1.02	1.06	0.25	0.18	0.66	0.63	XP_012077694.1	PREDICTED: serine/threonine-protein kinase ATR isoform X1 [Jatropha curcas]	GO:0016310(phosphorylation);GO:0010332(response to gamma radiation);GO:0007004(telomere maintenance via telomerase);GO:0006281(DNA repair);GO:0032204(regulation of telomere maintenance);GO:0010044(response to aluminum ion);GO:0033044(regulation of chromosome organization);GO:0006303(double-strand break repair via nonhomologous end joining);GO:0032504(multicellular organism reproduction);GO:000712…	GO:0009506(plasmodesma);GO:0005634(nucleus)	GO:0004674(protein serine/threonine kinase activity);GO:0016301(kinase activity);GO:0016740(transferase activity);GO:0005524(ATP binding);GO:0000166(nucleotide binding)	K06640|ATR|http://www.genome.jp/dbget-bin/www_bget?ko:K06640	*	KOG0891(L)(DNA-dependent protein kinase)	sp|Q9FKS4|ATR_ARATH	sp|Q9FKS4|ATR_ARATH Serine/threonine-protein kinase ATR OS=Arabidopsis thaliana GN=ATR PE=2 SV=2
DNA repair	Lus10025091.g	0.27	0.42	0.19	0.17	0.11	0.09	0.57	0.53	1.04	0.95	0.63	0.6	0.15	0.16	0.47	0.82	XP_012077694.1	PREDICTED: serine/threonine-protein kinase ATR isoform X1 [Jatropha curcas]	GO:0016310(phosphorylation);GO:0010332(response to gamma radiation);GO:0007004(telomere maintenance via telomerase);GO:0006281(DNA repair);GO:0032204(regulation of telomere maintenance);GO:0010044(response to aluminum ion);GO:0033044(regulation of chromosome organization);GO:0006303(double-strand break repair via nonhomologous end joining);GO:0032504(multicellular organism reproduction);GO:000712…	GO:0009506(plasmodesma);GO:0005634(nucleus)	GO:0004674(protein serine/threonine kinase activity);GO:0016301(kinase activity);GO:0016740(transferase activity);GO:0005524(ATP binding);GO:0000166(nucleotide binding)	K06640|ATR|http://www.genome.jp/dbget-bin/www_bget?ko:K06640	*	KOG0891(L)(DNA-dependent protein kinase)	sp|Q9FKS4|ATR_ARATH	sp|Q9FKS4|ATR_ARATH Serine/threonine-protein kinase ATR OS=Arabidopsis thaliana GN=ATR PE=2 SV=2
DNA repair	Lus10025575.g	2.64	2.12	3.2	2.74	11.16	5.51	12.55	9.99	8.95	8.37	8.73	7.73	8.12	9.52	11.15	9.29	XP_011026395.1	PREDICTED: endonuclease III homolog 1, chloroplastic isoform X1 [Populus euphratica]	GO:0006285(base-excision repair, AP site formation);GO:0008152(metabolic process);GO:0006974(cellular response to DNA damage stimulus);GO:0006284(base-excision repair);GO:0006281(DNA repair)	GO:0005634(nucleus)	GO:0003677(DNA binding);GO:0019104(DNA N-glycosylase activity);GO:0046872(metal ion binding);GO:0003824(catalytic activity);GO:0003906(DNA-(apurinic or apyrimidinic site) lyase activity);GO:0016829(lyase activity);GO:0051536(iron-sulfur cluster binding);GO:0016798(hydrolase activity, acting on glycosyl bonds);GO:0016787(hydrolase activity);GO:0051539(4 iron, 4 sulfur cluster binding)	K10773|NTH|http://www.genome.jp/dbget-bin/www_bget?ko:K10773	ko03410(Base excision repair)	KOG1921(L)(Endonuclease III)	sp|Q9SIC4|NTH1_ARATH	sp|Q9SIC4|NTH1_ARATH Endonuclease III homolog 1, chloroplastic OS=Arabidopsis thaliana GN=NTH1 PE=2 SV=2
DNA repair	Lus10027219.g	2.6	2.09	2.78	1.95	3.24	2.92	8.75	7.87	9.11	10.25	9.43	8.74	3.65	3.94	8.55	8.48	OAY48129.1	hypothetical protein MANES_06G133600 [Manihot esculenta]	GO:0006281(DNA repair);GO:0071139(resolution of recombination intermediates);GO:0051276(chromosome organization);GO:0000724(double-strand break repair via homologous recombination)	GO:0030915(Smc5-Smc6 complex);GO:0005694(chromosome)	GO:0005524(ATP binding)	*	*	KOG0979(BDL)(Structural maintenance of chromosome protein SMC5/Spr18, SMC superfamily)	sp|Q9FLR5|SMC6A_ARATH;sp|Q9FII7|SMC6B_ARATH	sp|Q9FLR5|SMC6A_ARATH Structural maintenance of chromosomes protein 6A OS=Arabidopsis thaliana GN=SMC6A PE=2 SV=1;sp|Q9FII7|SMC6B_ARATH Structural maintenance of chromosomes protein 6B OS=Arabidopsis thaliana GN=SMC6B PE=2 SV=1
DNA repair	Lus10028385.g	0.6	0.92	0.86	0.38	1.96	3.58	7.89	8.7	4.12	2.8	2.57	1.16	2.68	0.97	6.43	5.03	XP_002521670.1	PREDICTED: putative F-box protein At1g65770 [Ricinus communis]	GO:0006260(DNA replication);GO:0006310(DNA recombination);GO:0006302(double-strand break repair);GO:0006284(base-excision repair);GO:0032508(DNA duplex unwinding)	GO:0005737(cytoplasm);GO:0005694(chromosome);GO:0005634(nucleus)	GO:0003677(DNA binding);GO:0009378(four-way junction helicase activity);GO:0043140(ATP-dependent 3'-5' DNA helicase activity)	*	*	*	sp|Q9SHX9|FB72_ARATH	sp|Q9SHX9|FB72_ARATH Putative F-box protein At1g65770 OS=Arabidopsis thaliana GN=At1g65770 PE=4 SV=1
DNA repair	Lus10028966.g	0.46	0.46	1.08	0.81	0.61	0.97	2.14	2.71	1.77	2.09	1.9	1.29	0.89	0.8	2.4	2.28	EEF31729.1	DNA mismatch repair protein mutS, putative [Ricinus communis]	GO:0045143(homologous chromosome segregation);GO:0007129(synapsis);GO:0010777(meiotic mismatch repair involved in reciprocal meiotic recombination);GO:0006298(mismatch repair)	GO:0000794(condensed nuclear chromosome);GO:0043073(germ cell nucleus);GO:0009506(plasmodesma)	GO:0030983(mismatched DNA binding);GO:0005524(ATP binding)	K08740|MSH4|http://www.genome.jp/dbget-bin/www_bget?ko:K08740	*	KOG0217(L)(Mismatch repair ATPase MSH6 (MutS family))	sp|F4JP48|MSH4_ARATH	sp|F4JP48|MSH4_ARATH DNA mismatch repair protein MSH4 OS=Arabidopsis thaliana GN=MSH4 PE=2 SV=1
DNA repair	Lus10029476.g	0.39	0.43	0.34	0.46	0.36	0.65	2.21	1.42	2.41	2.34	1.99	2.06	0.37	0.63	1.63	1.47	XP_002517770.1	PREDICTED: structural maintenance of chromosomes protein 5 isoform X1 [Ricinus communis]	GO:0006281(DNA repair);GO:0071139(resolution of recombination intermediates);GO:0007062(sister chromatid cohesion);GO:0000724(double-strand break repair via homologous recombination)	GO:0030915(Smc5-Smc6 complex);GO:0009506(plasmodesma)	*	*	*	KOG0979(BDL)(Structural maintenance of chromosome protein SMC5/Spr18, SMC superfamily);KOG0964(D)(Structural maintenance of chromosome protein 3 (sister chromatid cohesion complex Cohesin, subunit SMC3))	sp|Q9LFS8|SMC5_ARATH	sp|Q9LFS8|SMC5_ARATH Structural maintenance of chromosomes protein 5 OS=Arabidopsis thaliana GN=SMC5 PE=2 SV=1
DNA repair	Lus10029911.g	1.97	1.82	1.7	1.52	1.37	1.32	4.49	4.31	6	4.56	5.02	4.27	2.15	1.69	5.2	4.74	XP_011023612.1	PREDICTED: LOW QUALITY PROTEIN: DNA polymerase zeta catalytic subunit [Populus euphratica]	GO:0019985(translesion synthesis);GO:0006281(DNA repair);GO:0006260(DNA replication);GO:0071494(cellular response to UV-C);GO:0006974(cellular response to DNA damage stimulus);GO:0042276(error-prone translesion synthesis);GO:0009411(response to UV);GO:0010224(response to UV-B)	GO:0016035(zeta DNA polymerase complex);GO:0005634(nucleus)	GO:0003677(DNA binding);GO:0016740(transferase activity);GO:0003676(nucleic acid binding);GO:0003887(DNA-directed DNA polymerase activity);GO:0008408(3'-5' exonuclease activity);GO:0000166(nucleotide binding);GO:0016779(nucleotidyltransferase activity);GO:0046872(metal ion binding);GO:0051536(iron-sulfur cluster binding);GO:0051539(4 iron, 4 sulfur cluster binding)	K02350|POLZ1, rev3|http://www.genome.jp/dbget-bin/www_bget?ko:K02350	*	KOG0969(L)(DNA polymerase delta, catalytic subunit)	sp|Q766Z3|REV3_ARATH	sp|Q766Z3|REV3_ARATH DNA polymerase zeta catalytic subunit OS=Arabidopsis thaliana GN=REV3 PE=2 SV=1
DNA repair	Lus10030284.g	0.48	0.11	0.46	0.71	0.23	0.34	0.98	1.28	2.98	3.54	3.89	3.13	0.55	0.3	1.56	1.66	OAY37535.1	hypothetical protein MANES_11G109100 [Manihot esculenta]	GO:0006281(DNA repair);GO:0000724(double-strand break repair via homologous recombination);GO:0000730(DNA recombinase assembly);GO:0006312(mitotic recombination);GO:0007126(meiotic cell cycle);GO:0007131(reciprocal meiotic recombination);GO:0007140(male meiotic nuclear division);GO:0007143(female meiotic nuclear division);GO:0010212(response to ionizing radiation);GO:0016444(somatic cell DNA reco…	GO:0000794(condensed nuclear chromosome);GO:0005654(nucleoplasm)	GO:0008094(DNA-dependent ATPase activity);GO:0003677(DNA binding);GO:0005524(ATP binding);GO:0000166(nucleotide binding);GO:0000150(recombinase activity);GO:0000400(four-way junction DNA binding);GO:0003684(damaged DNA binding);GO:0003690(double-stranded DNA binding);GO:0003697(single-stranded DNA binding);GO:0004520(endodeoxyribonuclease activity);GO:0005515(protein binding)	K10870|RAD51L2, RAD51C|http://www.genome.jp/dbget-bin/www_bget?ko:K10870	ko03440(Homologous recombination)	KOG1434(DL)(Meiotic recombination protein Dmc1)	sp|Q8GXF0|RA51C_ARATH	sp|Q8GXF0|RA51C_ARATH DNA repair protein RAD51 homolog 3 OS=Arabidopsis thaliana GN=RAD51C PE=1 SV=2
DNA repair	Lus10030376.g	5.19	4.8	4.58	4.09	17.05	14.78	15.5	12.54	12.33	11.12	10.96	12.67	13.72	9.23	14.82	14.68	XP_002321013.1	DNA mismatch repair family protein [Populus trichocarpa]	GO:0006310(DNA recombination);GO:0010154(fruit development);GO:0048316(seed development);GO:0009555(pollen development);GO:0006298(mismatch repair);GO:0007131(reciprocal meiotic recombination);GO:0006974(cellular response to DNA damage stimulus);GO:0006281(DNA repair)	GO:0032389(MutLalpha complex);GO:0032300(mismatch repair complex);GO:0005634(nucleus)	GO:0030983(mismatched DNA binding);GO:0003697(single-stranded DNA binding);GO:0005524(ATP binding);GO:0016887(ATPase activity)	K10858|PMS2|http://www.genome.jp/dbget-bin/www_bget?ko:K10858	ko03430(Mismatch repair)	KOG1978(L)(DNA mismatch repair protein - MLH2/PMS1/Pms2 family)	sp|Q941I6|PMS1_ARATH	sp|Q941I6|PMS1_ARATH DNA mismatch repair protein PMS1 OS=Arabidopsis thaliana GN=PMS1 PE=1 SV=1
DNA repair	Lus10030656.g	0.63	0.57	1.07	0.69	0.86	1.21	1.2	2.76	3.89	2.24	1.73	2.02	0.81	1.23	1.89	2.51	XP_012092039.1	PREDICTED: DNA polymerase beta [Jatropha curcas]	GO:0006281(DNA repair)	GO:0005634(nucleus)	GO:0003677(DNA binding);GO:0034061(DNA polymerase activity);GO:0003887(DNA-directed DNA polymerase activity);GO:0016779(nucleotidyltransferase activity)	K03512|POLL|http://www.genome.jp/dbget-bin/www_bget?ko:K03512	ko03410(Base excision repair);ko03450(Non-homologous end-joining)	KOG2534(L)(DNA polymerase IV (family X))	sp|Q9FNY4|DPOLL_ARATH	sp|Q9FNY4|DPOLL_ARATH DNA polymerase lambda OS=Arabidopsis thaliana GN=POLL PE=1 SV=1
DNA repair	Lus10030971.g	1.72	2.49	2.03	2.09	3.85	3.06	5.14	8.84	8	9.02	7.47	7.25	2.58	3.02	5.02	6.03	OAY57577.1	hypothetical protein MANES_02G107600 [Manihot esculenta]	GO:0006281(DNA repair)	GO:0005634(nucleus)	*	K02830|HRAD1, RAD17|http://www.genome.jp/dbget-bin/www_bget?ko:K02830	*	*	sp|Q9QWZ1|RAD1_MOUSE	sp|Q9QWZ1|RAD1_MOUSE Cell cycle checkpoint protein RAD1 OS=Mus musculus GN=Rad1 PE=1 SV=1
DNA repair	Lus10032195.g	4.7	3.45	3.75	3.24	3.06	4.49	6.99	9.84	6.3	4.93	4.76	4.75	3.39	3.81	14.52	14.63	XP_006368713.1	hypothetical protein POPTR_0001s08030g [Populus trichocarpa]	GO:0006281(DNA repair);GO:0009650(UV protection);GO:0000719(photoreactive repair)	*	GO:0003904(deoxyribodipyrimidine photo-lyase activity);GO:0003913(DNA photolyase activity);GO:0016829(lyase activity)	K01669|phrB|http://www.genome.jp/dbget-bin/www_bget?ko:K01669	*	*	sp|Q9SB00|PHR_ARATH;sp|Q6F6A2|PHR_ORYSJ	sp|Q9SB00|PHR_ARATH Deoxyribodipyrimidine photo-lyase OS=Arabidopsis thaliana GN=PHR1 PE=2 SV=1;sp|Q6F6A2|PHR_ORYSJ Deoxyribodipyrimidine photo-lyase OS=Oryza sativa subsp. japonica GN=PHR PE=1 SV=1
DNA repair	Lus10032469.g	0.25	0.11	0.14	0.05	0.44	0.23	0.59	0.31	0.61	0.42	0.62	0.45	0.04	0.07	0.41	0.44	XP_002511977.1	PREDICTED: DNA mismatch repair protein MSH2 [Ricinus communis]	GO:0006974(cellular response to DNA damage stimulus);GO:0006298(mismatch repair);GO:0006281(DNA repair);GO:0006311(meiotic gene conversion);GO:0007131(reciprocal meiotic recombination);GO:0045128(negative regulation of reciprocal meiotic recombination);GO:0000710(meiotic mismatch repair);GO:0043570(maintenance of DNA repeat elements);GO:0006301(postreplication repair)	GO:0032300(mismatch repair complex);GO:0032301(MutSalpha complex);GO:0032302(MutSbeta complex);GO:0000228(nuclear chromosome)	GO:0003677(DNA binding);GO:0005524(ATP binding);GO:0030983(mismatched DNA binding);GO:0000166(nucleotide binding);GO:0032137(guanine/thymine mispair binding);GO:0000404(heteroduplex DNA loop binding);GO:0000403(Y-form DNA binding);GO:0000400(four-way junction DNA binding);GO:0003684(damaged DNA binding);GO:0000406(double-strand/single-strand DNA junction binding)	K08735|MSH2|http://www.genome.jp/dbget-bin/www_bget?ko:K08735	ko03430(Mismatch repair)	KOG0217(L)(Mismatch repair ATPase MSH6 (MutS family))	sp|O24617|MSH2_ARATH	sp|O24617|MSH2_ARATH DNA mismatch repair protein MSH2 OS=Arabidopsis thaliana GN=MSH2 PE=1 SV=1
DNA repair	Lus10032515.g	1.68	1.67	1.49	1.67	3.04	3.92	6.37	4.7	5.03	3.52	5.85	4.57	4.99	5.78	7.41	7.08	XP_015579653.1	PREDICTED: uncharacterized protein LOC8275459 isoform X1 [Ricinus communis]	GO:0006281(DNA repair)	GO:0005634(nucleus)	GO:0016818(hydrolase activity, acting on acid anhydrides, in phosphorus-containing anhydrides);GO:0003676(nucleic acid binding);GO:0008270(zinc ion binding);GO:0008081(phosphoric diester hydrolase activity)	*	*	*	*	*
DNA repair	Lus10033274.g	1.46	1.61	1.5	1.42	2.99	3.19	7.56	5.53	6.51	6.87	4.24	5.58	2.67	2.5	5.2	5.03	XP_012085006.1	PREDICTED: DNA mismatch repair protein MLH1 [Jatropha curcas]	GO:0006298(mismatch repair);GO:0006355(regulation of transcription, DNA-templated)	GO:0032389(MutLalpha complex);GO:0000795(synaptonemal complex);GO:0005712(chiasma);GO:0005739(mitochondrion)	GO:0005524(ATP binding);GO:0030983(mismatched DNA binding);GO:0003697(single-stranded DNA binding);GO:0016887(ATPase activity);GO:0003690(double-stranded DNA binding)	K08734|MLH1|http://www.genome.jp/dbget-bin/www_bget?ko:K08734	ko03430(Mismatch repair)	KOG1978(L)(DNA mismatch repair protein - MLH2/PMS1/Pms2 family)	sp|Q9ZRV4|MLH1_ARATH	sp|Q9ZRV4|MLH1_ARATH DNA mismatch repair protein MLH1 OS=Arabidopsis thaliana GN=MLH1 PE=2 SV=1
DNA repair	Lus10033471.g	11.81	11.88	17.02	10.56	16.79	17.71	37.24	39.79	39.46	37.29	33.7	36.63	15.77	18.33	31.54	32.86	XP_010033678.1	PREDICTED: uncharacterized protein LOC104422912 isoform X2 [Eucalyptus grandis]	GO:0055114(oxidation-reduction process);GO:0006281(DNA repair)	*	GO:0016491(oxidoreductase activity)	*	*	*	sp|P05050|ALKB_ECOLI	sp|P05050|ALKB_ECOLI Alpha-ketoglutarate-dependent dioxygenase AlkB OS=Escherichia coli (strain K12) GN=alkB PE=1 SV=1
DNA repair	Lus10033499.g	10.86	10.33	8.43	9.77	13.94	28.73	31.67	72.93	15.91	9.81	9.21	7.9	19.09	20.08	39.46	43.08	XP_015580130.1	PREDICTED: cryptochrome DASH, chloroplastic/mitochondrial [Ricinus communis]	GO:0006281(DNA repair)	*	GO:0003913(DNA photolyase activity)	K01669|phrB|http://www.genome.jp/dbget-bin/www_bget?ko:K01669	*	KOG0133(LT)(Deoxyribodipyrimidine photolyase/cryptochrome)	sp|Q651U1|CRYD_ORYSJ;sp|Q84KJ5|CRYD_ARATH	sp|Q651U1|CRYD_ORYSJ Cryptochrome DASH, chloroplastic/mitochondrial OS=Oryza sativa subsp. japonica GN=CRYD PE=2 SV=1;sp|Q84KJ5|CRYD_ARATH Cryptochrome DASH, chloroplastic/mitochondrial OS=Arabidopsis thaliana GN=CRYD PE=1 SV=2
DNA repair	Lus10034734.g	2.06	2.17	1.29	0.8	2.01	1.82	8.87	11.84	20.71	18.36	10.39	10.4	1.73	2.47	7.54	8.93	XP_012085006.1	PREDICTED: DNA mismatch repair protein MLH1 [Jatropha curcas]	GO:0006298(mismatch repair);GO:0019915(lipid storage)	GO:0032389(MutLalpha complex);GO:0000795(synaptonemal complex);GO:0005712(chiasma);GO:0016020(membrane);GO:0016021(integral component of membrane)	GO:0005524(ATP binding);GO:0030983(mismatched DNA binding);GO:0003697(single-stranded DNA binding);GO:0016887(ATPase activity)	K08734|MLH1|http://www.genome.jp/dbget-bin/www_bget?ko:K08734;K19365|BSCL2|http://www.genome.jp/dbget-bin/www_bget?ko:K19365	ko03430(Mismatch repair)	KOG1978(L)(DNA mismatch repair protein - MLH2/PMS1/Pms2 family);KOG1979(L)(DNA mismatch repair protein - MLH1 family)	sp|Q9ZRV4|MLH1_ARATH;sp|Q8L615|SEI3_ARATH	sp|Q9ZRV4|MLH1_ARATH DNA mismatch repair protein MLH1 OS=Arabidopsis thaliana GN=MLH1 PE=2 SV=1;sp|Q8L615|SEI3_ARATH Seipin-3 OS=Arabidopsis thaliana GN=SEI3 PE=2 SV=1
DNA repair	Lus10034749.g	0.83	0.85	0.68	0.81	1.26	2.03	3.86	3.29	3.08	4.16	2.21	2.43	1.19	1.49	4.76	4.38	XP_010056154.1	PREDICTED: mediator of RNA polymerase II transcription subunit 34 isoform X1 [Eucalyptus grandis]	GO:0044237(cellular metabolic process);GO:0006310(DNA recombination);GO:0006281(DNA repair);GO:0006260(DNA replication);GO:0000724(double-strand break repair via homologous recombination);GO:0032508(DNA duplex unwinding)	GO:0005622(intracellular);GO:0005737(cytoplasm);GO:0016592(mediator complex);GO:0005694(chromosome);GO:0005634(nucleus)	GO:0008026(ATP-dependent helicase activity);GO:0003676(nucleic acid binding);GO:0043140(ATP-dependent 3'-5' DNA helicase activity);GO:0003824(catalytic activity);GO:0005524(ATP binding);GO:0004386(helicase activity);GO:0000166(nucleotide binding);GO:0016787(hydrolase activity);GO:0003677(DNA binding);GO:0009378(four-way junction helicase activity);GO:0043138(3'-5' DNA helicase activity)	K10899|RECQL|http://www.genome.jp/dbget-bin/www_bget?ko:K10899	*	KOG0351(L)(ATP-dependent DNA helicase)	sp|Q9FT73|MED34_ARATH	sp|Q9FT73|MED34_ARATH Mediator of RNA polymerase II transcription subunit 34 OS=Arabidopsis thaliana GN=MED34 PE=1 SV=1
DNA repair	Lus10035332.g	4.34	4.24	4.63	4.68	16.96	17.91	15.26	16.24	4	3.21	3.62	2.73	15.34	13.75	18.92	15.16	OAY35060.1	hypothetical protein MANES_12G068900 [Manihot esculenta]	GO:0016567(protein ubiquitination);GO:0055114(oxidation-reduction process);GO:0032436(positive regulation of proteasomal ubiquitin-dependent protein catabolic process);GO:0048573(photoperiodism, flowering);GO:0010119(regulation of stomatal movement);GO:0006281(DNA repair);GO:0009649(entrainment of circadian clock);GO:0009641(shade avoidance);GO:0046283(anthocyanin-containing compound metabolic pr…	GO:0016604(nuclear body);GO:0005654(nucleoplasm);GO:0005634(nucleus)	GO:0061630(ubiquitin protein ligase activity);GO:0008270(zinc ion binding);GO:0046872(metal ion binding);GO:0032440(2-alkenal reductase [NAD(P)] activity);GO:0016491(oxidoreductase activity);GO:0016874(ligase activity);GO:0004842(ubiquitin-protein transferase activity);GO:0042802(identical protein binding)	K10143|RFWD2, COP1|http://www.genome.jp/dbget-bin/www_bget?ko:K10143	ko04120(Ubiquitin mediated proteolysis);ko04712(Circadian rhythm - plant)	KOG0264(B)(Nucleosome remodeling factor, subunit CAF1/NURF55/MSI1)	sp|P43254|COP1_ARATH	sp|P43254|COP1_ARATH E3 ubiquitin-protein ligase COP1 OS=Arabidopsis thaliana GN=COP1 PE=1 SV=2
DNA repair	Lus10036237.g	1.08	0.87	1.45	1.07	1.89	2.34	2.92	2.78	3.02	2.92	3.05	3.62	2.68	2.99	5.39	5.74	XP_012065131.1	PREDICTED: DNA polymerase eta-like [Jatropha curcas]	GO:0006281(DNA repair)	*	GO:0003684(damaged DNA binding)	K03509|POLH|http://www.genome.jp/dbget-bin/www_bget?ko:K03509	*	KOG2095(L)(DNA polymerase iota/DNA damage inducible protein)	sp|Q8H2D5|POLH_ARATH	sp|Q8H2D5|POLH_ARATH DNA polymerase eta OS=Arabidopsis thaliana GN=POLH PE=1 SV=1
DNA repair	Lus10037630.g	1.39	2.11	1.37	0.86	8.7	9.34	7.66	8.22	4.48	3.73	2.93	2.4	12.31	10.38	7.6	6.06	XP_012068964.1	PREDICTED: nucleosome assembly protein 1;4 [Jatropha curcas]	GO:0006334(nucleosome assembly);GO:0000724(double-strand break repair via homologous recombination);GO:0006281(DNA repair);GO:0009294(DNA mediated transformation);GO:0016444(somatic cell DNA recombination);GO:0046686(response to cadmium ion)	GO:0005634(nucleus);GO:0005737(cytoplasm);GO:0005829(cytosol);GO:0005886(plasma membrane)	GO:0042393(histone binding);GO:0003677(DNA binding);GO:0005515(protein binding);GO:0042802(identical protein binding)	K11279|NAP1L1, NRP|http://www.genome.jp/dbget-bin/www_bget?ko:K11279	*	KOG1508(L)(DNA replication factor/protein phosphatase inhibitor SET/SPR-2)	sp|Q9ZUP3|NAP1B_ARATH	sp|Q9ZUP3|NAP1B_ARATH Nucleosome assembly protein 1;2 OS=Arabidopsis thaliana GN=NAP1;2 PE=1 SV=1
DNA repair	Lus10039205.g	0.88	0.57	0.67	0.37	1.48	1.54	3.11	2.15	3.14	3.09	2.56	1.66	1.28	1.71	1.67	1.75	XP_012072725.1	PREDICTED: non-structural maintenance of chromosomes element 4 homolog A isoform X2 [Jatropha curcas]	GO:0006281(DNA repair)	GO:0030915(Smc5-Smc6 complex);GO:0005634(nucleus)	*	*	*	KOG2866(S)(Uncharacterized conserved protein)	sp|Q9C689|NSE4A_ARATH	sp|Q9C689|NSE4A_ARATH Non-structural maintenance of chromosomes element 4 homolog A OS=Arabidopsis thaliana GN=NSE4A PE=2 SV=1
DNA repair	Lus10039383.g	0.13	0.47	0.25	0.2	1.7	1.46	1.73	2.01	0.78	0.48	0.94	0.62	0.92	0.85	1.32	1.67	XP_015573480.1	PREDICTED: meiotic recombination protein DMC1 homolog isoform X2 [Ricinus communis]	GO:0006259(DNA metabolic process);GO:0007131(reciprocal meiotic recombination);GO:0006281(DNA repair)	GO:0005634(nucleus)	GO:0008094(DNA-dependent ATPase activity);GO:0003677(DNA binding);GO:0005524(ATP binding);GO:0000166(nucleotide binding)	K10872|DMC1|http://www.genome.jp/dbget-bin/www_bget?ko:K10872	*	KOG1434(DL)(Meiotic recombination protein Dmc1)	sp|Q96449|DMC1_SOYBN	sp|Q96449|DMC1_SOYBN Meiotic recombination protein DMC1 homolog OS=Glycine max PE=2 SV=1
DNA repair	Lus10039566.g	1.63	1.28	1.19	1.29	2.07	2.13	3.79	3.81	4.1	3.21	3.38	2.76	2.22	2.06	5.25	4.33	XP_011042136.1	PREDICTED: crossover junction endonuclease MUS81 isoform X2 [Populus euphratica]	GO:0006259(DNA metabolic process);GO:0006281(DNA repair)	GO:0048476(Holliday junction resolvase complex);GO:0005634(nucleus)	GO:0003677(DNA binding);GO:0004518(nuclease activity);GO:0008821(crossover junction endodeoxyribonuclease activity);GO:0004519(endonuclease activity)	K08991|MUS81|http://www.genome.jp/dbget-bin/www_bget?ko:K08991	ko03440(Homologous recombination)	KOG2379(L)(Endonuclease MUS81)	sp|Q5W9E7|MUS81_ARATH	sp|Q5W9E7|MUS81_ARATH Crossover junction endonuclease MUS81 OS=Arabidopsis thaliana GN=MUS81 PE=1 SV=1
DNA repair	Lus10039590.g	0.53	0.34	0.8	0.53	0.61	0.66	1.24	2.15	2.36	1.86	1.77	1.71	0.39	0.42	1.33	1.34	XP_012065615.1	PREDICTED: structural maintenance of chromosomes protein 5 [Jatropha curcas]	GO:0006281(DNA repair);GO:0071139(resolution of recombination intermediates);GO:0007062(sister chromatid cohesion);GO:0000724(double-strand break repair via homologous recombination)	GO:0030915(Smc5-Smc6 complex);GO:0009506(plasmodesma)	*	*	*	KOG0250(L)(DNA repair protein RAD18 (SMC family protein));KOG0964(D)(Structural maintenance of chromosome protein 3 (sister chromatid cohesion complex Cohesin, subunit SMC3))	sp|Q9LFS8|SMC5_ARATH	sp|Q9LFS8|SMC5_ARATH Structural maintenance of chromosomes protein 5 OS=Arabidopsis thaliana GN=SMC5 PE=2 SV=1
DNA repair	Lus10041375.g	1.08	0.96	2.82	1.53	1.95	2.35	3.16	3.31	2.83	2.86	3.84	4.1	3.66	2.81	4.65	3.51	XP_011035441.1	PREDICTED: flap endonuclease GEN-like 1 isoform X2 [Populus euphratica]	GO:0006281(DNA repair);GO:0009555(pollen development)	GO:0005634(nucleus)	GO:0003824(catalytic activity);GO:0003677(DNA binding);GO:0004518(nuclease activity);GO:0003690(double-stranded DNA binding);GO:0048256(flap endonuclease activity);GO:0003697(single-stranded DNA binding)	K15338|GEN1, GEN|http://www.genome.jp/dbget-bin/www_bget?ko:K15338	*	KOG2519(L)(5'-3' exonuclease)	sp|Q9LPD2|GENL1_ARATH	sp|Q9LPD2|GENL1_ARATH Flap endonuclease GEN-like 1 OS=Arabidopsis thaliana GN=GEN1 PE=3 SV=3
DNA repair	Lus10041749.g	2.29	1.54	1.29	2.24	4.86	4.63	12.07	12.38	6.18	8.11	6.95	7.1	4.15	2.66	7.77	6.17	OAY57397.1	hypothetical protein MANES_02G094000 [Manihot esculenta]	GO:0006284(base-excision repair);GO:0006281(DNA repair);GO:0008152(metabolic process)	GO:0005634(nucleus)	GO:0003824(catalytic activity);GO:0008725(DNA-3-methyladenine glycosylase activity);GO:0003905(alkylbase DNA N-glycosylase activity);GO:0043916(DNA-7-methylguanine glycosylase activity);GO:0016798(hydrolase activity, acting on glycosyl bonds);GO:0052822(DNA-3-methylguanine glycosylase activity);GO:0016787(hydrolase activity);GO:0052821(DNA-7-methyladenine glycosylase activity);GO:0019104(DNA N-gl…	K01247|alkA|http://www.genome.jp/dbget-bin/www_bget?ko:K01247	ko03410(Base excision repair)	KOG1918(L)(3-methyladenine DNA glycosidase)	sp|Q92383|MAG1_SCHPO	sp|Q92383|MAG1_SCHPO DNA-3-methyladenine glycosylase 1 OS=Schizosaccharomyces pombe (strain 972 / ATCC 24843) GN=mag1 PE=1 SV=1
DNA repair	Lus10041838.g	4.47	4.85	8.86	6.34	13	9.25	18.15	14.81	11.68	12.73	10.1	10.56	19.83	11.88	16.1	16.29	XP_002521670.1	PREDICTED: putative F-box protein At1g65770 [Ricinus communis]	GO:0006310(DNA recombination);GO:0006302(double-strand break repair);GO:0006284(base-excision repair);GO:0006260(DNA replication);GO:0032508(DNA duplex unwinding)	GO:0005737(cytoplasm);GO:0005694(chromosome);GO:0005634(nucleus)	GO:0003677(DNA binding);GO:0009378(four-way junction helicase activity);GO:0043140(ATP-dependent 3'-5' DNA helicase activity)	*	*	*	sp|Q9SHX9|FB72_ARATH;sp|Q3EBY8|FB111_ARATH	sp|Q9SHX9|FB72_ARATH Putative F-box protein At1g65770 OS=Arabidopsis thaliana GN=At1g65770 PE=4 SV=1;sp|Q3EBY8|FB111_ARATH F-box protein At2g17690 OS=Arabidopsis thaliana GN=SDC PE=2 SV=1
DNA repair	Lus10042451.g	0.42	0.24	0.52	0.26	0.78	0.96	1	0.81	1.14	1.32	1.09	1.25	1	1.13	1.22	0.91	XP_011036936.1	PREDICTED: ATP-dependent DNA helicase Q-like 1 [Populus euphratica]	GO:0006310(DNA recombination);GO:0000724(double-strand break repair via homologous recombination)	GO:0005737(cytoplasm);GO:0005694(chromosome);GO:0005634(nucleus)	GO:0008026(ATP-dependent helicase activity);GO:0003676(nucleic acid binding);GO:0005524(ATP binding);GO:0004386(helicase activity);GO:0016787(hydrolase activity);GO:0003677(DNA binding);GO:0009378(four-way junction helicase activity);GO:0043140(ATP-dependent 3'-5' DNA helicase activity)	K10901|BLM, RECQL3, SGS1|http://www.genome.jp/dbget-bin/www_bget?ko:K10901	ko03440(Homologous recombination)	KOG0351(L)(ATP-dependent DNA helicase)	sp|Q9FT74|RQL1_ARATH	sp|Q9FT74|RQL1_ARATH ATP-dependent DNA helicase Q-like 1 OS=Arabidopsis thaliana GN=RECQL1 PE=2 SV=1
DNA repair	Lus10042459.g	0.02	0.1	0.06	0.05	0.38	0.47	0.57	0.96	0.54	0.57	0.43	0.33	0.8	0.59	0.2	0.34	XP_015870355.1	PREDICTED: protein TOO MANY MOUTHS [Ziziphus jujuba]	GO:0006281(DNA repair);GO:0008356(asymmetric cell division);GO:0009737(response to abscisic acid)	GO:0030915(Smc5-Smc6 complex);GO:0005634(nucleus);GO:0016020(membrane)	*	*	*	KOG2866(S)(Uncharacterized conserved protein)	sp|Q9C689|NSE4A_ARATH;sp|Q9SSD1|TMM_ARATH	sp|Q9C689|NSE4A_ARATH Non-structural maintenance of chromosomes element 4 homolog A OS=Arabidopsis thaliana GN=NSE4A PE=2 SV=1;sp|Q9SSD1|TMM_ARATH Protein TOO MANY MOUTHS OS=Arabidopsis thaliana GN=TMM PE=1 SV=1
DNA repair	Lus10042967.g	0.19	0.38	0.44	0.44	0.3	1.1	1.3	1.43	1.08	0.97	0.66	1.26	0.73	0.61	1.06	2.1	XP_002511977.1	PREDICTED: DNA mismatch repair protein MSH2 [Ricinus communis]	GO:0006974(cellular response to DNA damage stimulus);GO:0006298(mismatch repair);GO:0006281(DNA repair);GO:0006311(meiotic gene conversion);GO:0007131(reciprocal meiotic recombination);GO:0045128(negative regulation of reciprocal meiotic recombination);GO:0000710(meiotic mismatch repair);GO:0043570(maintenance of DNA repeat elements);GO:0006301(postreplication repair)	GO:0032300(mismatch repair complex);GO:0032301(MutSalpha complex);GO:0032302(MutSbeta complex);GO:0000228(nuclear chromosome)	GO:0003677(DNA binding);GO:0005524(ATP binding);GO:0030983(mismatched DNA binding);GO:0000166(nucleotide binding);GO:0032137(guanine/thymine mispair binding);GO:0000404(heteroduplex DNA loop binding);GO:0000403(Y-form DNA binding);GO:0000400(four-way junction DNA binding);GO:0003684(damaged DNA binding);GO:0000406(double-strand/single-strand DNA junction binding)	K08735|MSH2|http://www.genome.jp/dbget-bin/www_bget?ko:K08735	ko03430(Mismatch repair)	KOG0217(L)(Mismatch repair ATPase MSH6 (MutS family))	sp|O24617|MSH2_ARATH	sp|O24617|MSH2_ARATH DNA mismatch repair protein MSH2 OS=Arabidopsis thaliana GN=MSH2 PE=1 SV=1
DNA repair	scaffold121.34	2.22	2.09	1.76	2.29	1.86	1.83	7.77	6.24	8.87	8	6.17	6.56	1.14	1.37	4.91	4.57	OAY24682.1	hypothetical protein MANES_17G035000 [Manihot esculenta]	GO:0006281(DNA repair)	GO:0005634(nucleus)	GO:0008081(phosphoric diester hydrolase activity)	K10862|TDP1|http://www.genome.jp/dbget-bin/www_bget?ko:K10862	*	KOG2031(L)(Tyrosyl-DNA phosphodiesterase)	sp|Q8H1D9|TYDP1_ARATH	sp|Q8H1D9|TYDP1_ARATH Tyrosyl-DNA phosphodiesterase 1 OS=Arabidopsis thaliana GN=TDP1 PE=1 SV=1
proline biosynthetic process	Lus10001016.g	13.5	10.4	15.68	16.35	24.43	17.39	204.02	220.71	73.12	70.17	40.73	49.18	15.45	22.91	171.85	111.96	XP_010658318.1	PREDICTED: pyrroline-5-carboxylate synthetase isoform X1 [Vitis vinifera]	GO:0008152(metabolic process);GO:0006561(proline biosynthetic process);GO:0055114(oxidation-reduction process)	GO:0005737(cytoplasm)	GO:0004349(glutamate 5-kinase activity);GO:0016740(transferase activity);GO:0004350(glutamate-5-semialdehyde dehydrogenase activity);GO:0003824(catalytic activity);GO:0016620(oxidoreductase activity, acting on the aldehyde or oxo group of donors, NAD or NADP as acceptor);GO:0016491(oxidoreductase activity)	K12657|ALDH18A1, P5CS|http://www.genome.jp/dbget-bin/www_bget?ko:K12657	ko00330(Arginine and proline metabolism);ko01230(Biosynthesis of amino acids)	KOG4165(E)(Gamma-glutamyl phosphate reductase)	sp|O04015|P5CS_ACTDE	sp|O04015|P5CS_ACTDE Delta-1-pyrroline-5-carboxylate synthase OS=Actinidia deliciosa PE=2 SV=1
proline biosynthetic process	Lus10001018.g	9.22	9.2	10.15	9.61	17.15	13.76	173.66	172.64	52.3	59.58	34.14	38.55	10.84	15.86	161.3	90.33	AGC51785.1	delta1-pyrroline-5-carboxylate synthase [Manihot esculenta]	GO:0008152(metabolic process);GO:0006561(proline biosynthetic process);GO:0055114(oxidation-reduction process)	GO:0005737(cytoplasm)	GO:0004349(glutamate 5-kinase activity);GO:0016740(transferase activity);GO:0004350(glutamate-5-semialdehyde dehydrogenase activity);GO:0003824(catalytic activity);GO:0016620(oxidoreductase activity, acting on the aldehyde or oxo group of donors, NAD or NADP as acceptor);GO:0016491(oxidoreductase activity)	K12657|ALDH18A1, P5CS|http://www.genome.jp/dbget-bin/www_bget?ko:K12657	ko00330(Arginine and proline metabolism);ko01230(Biosynthesis of amino acids)	KOG4165(E)(Gamma-glutamyl phosphate reductase)	sp|O04015|P5CS_ACTDE	sp|O04015|P5CS_ACTDE Delta-1-pyrroline-5-carboxylate synthase OS=Actinidia deliciosa PE=2 SV=1
proline biosynthetic process	Lus10001019.g	7.04	8.2	7.18	7.51	15.82	5.85	163.62	105.49	34.81	42.58	21.84	24.44	7.12	4.38	111.19	43.46	XP_012454204.1	PREDICTED: delta-1-pyrroline-5-carboxylate synthase-like [Gossypium raimondii]	GO:0008152(metabolic process);GO:0006561(proline biosynthetic process);GO:0055114(oxidation-reduction process)	GO:0005737(cytoplasm)	GO:0004349(glutamate 5-kinase activity);GO:0016740(transferase activity);GO:0004350(glutamate-5-semialdehyde dehydrogenase activity);GO:0003824(catalytic activity);GO:0016620(oxidoreductase activity, acting on the aldehyde or oxo group of donors, NAD or NADP as acceptor);GO:0016491(oxidoreductase activity)	K12657|ALDH18A1, P5CS|http://www.genome.jp/dbget-bin/www_bget?ko:K12657	ko00330(Arginine and proline metabolism);ko01230(Biosynthesis of amino acids)	KOG1154(E)(Gamma-glutamyl kinase)	sp|O04015|P5CS_ACTDE	sp|O04015|P5CS_ACTDE Delta-1-pyrroline-5-carboxylate synthase OS=Actinidia deliciosa PE=2 SV=1
proline biosynthetic process	Lus10004696.g	58.5	61.02	31.42	45.93	42.71	20.74	1484.18	671.49	527.66	828.86	590.1	621.4	16.19	11.32	592.05	318.41	KHG12117.1	Delta-1-pyrroline-5-carboxylate synthase [Gossypium arboreum]	GO:0008152(metabolic process);GO:0006561(proline biosynthetic process);GO:0055114(oxidation-reduction process)	GO:0005737(cytoplasm)	GO:0003824(catalytic activity);GO:0004349(glutamate 5-kinase activity);GO:0016740(transferase activity);GO:0016620(oxidoreductase activity, acting on the aldehyde or oxo group of donors, NAD or NADP as acceptor);GO:0004350(glutamate-5-semialdehyde dehydrogenase activity);GO:0016491(oxidoreductase activity)	K12657|ALDH18A1, P5CS|http://www.genome.jp/dbget-bin/www_bget?ko:K12657	ko00330(Arginine and proline metabolism);ko01230(Biosynthesis of amino acids)	KOG4165(E)(Gamma-glutamyl phosphate reductase);KOG1154(E)(Gamma-glutamyl kinase)	sp|O04015|P5CS_ACTDE	sp|O04015|P5CS_ACTDE Delta-1-pyrroline-5-carboxylate synthase OS=Actinidia deliciosa PE=2 SV=1
proline biosynthetic process	Lus10004697.g	79.88	76.07	98.83	98.55	39.6	60.76	1974.12	2519.16	1757.58	1795.84	1427.24	1442.5	39.3	56.66	2328.39	2352.64	XP_018809083.1	PREDICTED: delta-1-pyrroline-5-carboxylate synthase isoform X1 [Juglans regia]	GO:0008152(metabolic process);GO:0006561(proline biosynthetic process);GO:0055114(oxidation-reduction process)	GO:0005737(cytoplasm)	GO:0003824(catalytic activity);GO:0004349(glutamate 5-kinase activity);GO:0016740(transferase activity);GO:0016620(oxidoreductase activity, acting on the aldehyde or oxo group of donors, NAD or NADP as acceptor);GO:0004350(glutamate-5-semialdehyde dehydrogenase activity);GO:0016491(oxidoreductase activity)	K12657|ALDH18A1, P5CS|http://www.genome.jp/dbget-bin/www_bget?ko:K12657	ko00330(Arginine and proline metabolism);ko01230(Biosynthesis of amino acids)	KOG4165(E)(Gamma-glutamyl phosphate reductase)	sp|P54888|P5CS2_ARATH;sp|O04015|P5CS_ACTDE	sp|P54888|P5CS2_ARATH Delta-1-pyrroline-5-carboxylate synthase B OS=Arabidopsis thaliana GN=P5CSB PE=2 SV=1;sp|O04015|P5CS_ACTDE Delta-1-pyrroline-5-carboxylate synthase OS=Actinidia deliciosa PE=2 SV=1
proline biosynthetic process	Lus10016354.g	7.96	9.28	7.82	9.8	10.89	10.8	24.28	33.73	26.82	25.82	28.38	27.11	8.23	13.1	28.23	26.93	XP_002513092.1	PREDICTED: xanthoxin dehydrogenase [Ricinus communis]	GO:0055114(oxidation-reduction process);GO:0009408(response to heat);GO:0009750(response to fructose);GO:0009688(abscisic acid biosynthetic process);GO:0010115(regulation of abscisic acid biosynthetic process);GO:0006561(proline biosynthetic process);GO:0009414(response to water deprivation)	GO:0005829(cytosol)	GO:0004316(3-oxoacyl-[acyl-carrier-protein] reductase (NADPH) activity);GO:0016491(oxidoreductase activity);GO:0004022(alcohol dehydrogenase (NAD) activity);GO:0010301(xanthoxin dehydrogenase activity)	K09841|ABA2|http://www.genome.jp/dbget-bin/www_bget?ko:K09841	ko00906(Carotenoid biosynthesis)	KOG0725(R)(Reductases with broad range of substrate specificities)	sp|Q9C826|ABA2_ARATH	sp|Q9C826|ABA2_ARATH Xanthoxin dehydrogenase OS=Arabidopsis thaliana GN=ABA2 PE=1 SV=1
proline biosynthetic process	Lus10019103.g	23.59	23.74	19.76	22.51	54.93	59.72	111.92	112.55	77.81	77.34	64.25	75.98	33.86	42.37	87.25	65.51	XP_015898143.1	PREDICTED: pyrroline-5-carboxylate reductase-like isoform X1 [Ziziphus jujuba]	GO:0006561(proline biosynthetic process);GO:0055114(oxidation-reduction process);GO:0055129(L-proline biosynthetic process);GO:0008652(cellular amino acid biosynthetic process)	GO:0005618(cell wall)	GO:0004735(pyrroline-5-carboxylate reductase activity);GO:0016491(oxidoreductase activity)	K00286|proC|http://www.genome.jp/dbget-bin/www_bget?ko:K00286	ko00330(Arginine and proline metabolism);ko01230(Biosynthesis of amino acids)	KOG3124(E)(Pyrroline-5-carboxylate reductase)	sp|O04016|P5CR_ACTCH;sp|Q04708|P5CR_PEA	sp|O04016|P5CR_ACTCH Pyrroline-5-carboxylate reductase OS=Actinidia chinensis PE=2 SV=1;sp|Q04708|P5CR_PEA Pyrroline-5-carboxylate reductase OS=Pisum sativum GN=PROC PE=2 SV=1
proline biosynthetic process	Lus10030158.g	16.45	15.4	16.62	18.73	22.65	17.92	189.18	211.12	96.38	84.79	33.53	37.68	14.08	25.35	73.28	86.65	AGC51785.1	delta1-pyrroline-5-carboxylate synthase [Manihot esculenta]	GO:0008152(metabolic process);GO:0006561(proline biosynthetic process);GO:0055114(oxidation-reduction process)	GO:0005737(cytoplasm)	GO:0004349(glutamate 5-kinase activity);GO:0016740(transferase activity);GO:0004350(glutamate-5-semialdehyde dehydrogenase activity);GO:0003824(catalytic activity);GO:0016620(oxidoreductase activity, acting on the aldehyde or oxo group of donors, NAD or NADP as acceptor);GO:0016491(oxidoreductase activity)	K12657|ALDH18A1, P5CS|http://www.genome.jp/dbget-bin/www_bget?ko:K12657	ko00330(Arginine and proline metabolism);ko01230(Biosynthesis of amino acids)	KOG4165(E)(Gamma-glutamyl phosphate reductase);KOG1154(E)(Gamma-glutamyl kinase)	sp|O04015|P5CS_ACTDE;sp|P54887|P5CS1_ARATH	sp|O04015|P5CS_ACTDE Delta-1-pyrroline-5-carboxylate synthase OS=Actinidia deliciosa PE=2 SV=1;sp|P54887|P5CS1_ARATH Delta-1-pyrroline-5-carboxylate synthase A OS=Arabidopsis thaliana GN=P5CSA PE=1 SV=1
proline biosynthetic process	Lus10034453.g	20.43	21.88	22	17.11	22.35	20.28	70.92	90.46	83.65	83.03	69.61	69.17	17.52	22.63	50.4	51.53	XP_002307988.1	hypothetical protein POPTR_0006s04100g [Populus trichocarpa]	GO:0006561(proline biosynthetic process);GO:0055114(oxidation-reduction process);GO:0055129(L-proline biosynthetic process);GO:0008652(cellular amino acid biosynthetic process)	GO:0005618(cell wall)	GO:0004735(pyrroline-5-carboxylate reductase activity);GO:0016491(oxidoreductase activity)	K00286|proC|http://www.genome.jp/dbget-bin/www_bget?ko:K00286	ko00330(Arginine and proline metabolism);ko01230(Biosynthesis of amino acids)	KOG3124(E)(Pyrroline-5-carboxylate reductase)	sp|Q04708|P5CR_PEA;sp|P54904|P5CR1_ARATH	sp|Q04708|P5CR_PEA Pyrroline-5-carboxylate reductase OS=Pisum sativum GN=PROC PE=2 SV=1;sp|P54904|P5CR1_ARATH Pyrroline-5-carboxylate reductase OS=Arabidopsis thaliana GN=PROC1 PE=2 SV=1
proline biosynthetic process	Lus10037544.g	1.7	2.63	3.16	2.18	8.57	7.92	15.81	15.46	12.3	12.65	8.98	9.78	13.24	10.64	14.01	23.28	OAY36750.1	hypothetical protein MANES_11G045200 [Manihot esculenta]	GO:0006810(transport);GO:0055085(transmembrane transport);GO:0006412(translation);GO:0089709(L-histidine transmembrane transport);GO:0006561(proline biosynthetic process);GO:0043091(L-arginine import);GO:1903352(L-ornithine transmembrane transport);GO:1903826(arginine transmembrane transport);GO:1903401(L-lysine transmembrane transport)	GO:0016020(membrane);GO:0016021(integral component of membrane);GO:0005739(mitochondrion)	GO:0003735(structural constituent of ribosome);GO:0015189(L-lysine transmembrane transporter activity);GO:0005290(L-histidine transmembrane transporter activity);GO:0000064(L-ornithine transmembrane transporter activity);GO:0015181(arginine transmembrane transporter activity)	K15109|SLC25A20_29, CACT, CACL, CRC1|http://www.genome.jp/dbget-bin/www_bget?ko:K15109	*	KOG0758(C)(Mitochondrial carnitine-acylcarnitine carrier protein)	sp|Q9CA93|BAC2_ARATH	sp|Q9CA93|BAC2_ARATH Mitochondrial arginine transporter BAC2 OS=Arabidopsis thaliana GN=BAC2 PE=1 SV=1
proline biosynthetic process	Lus10040262.g	7.96	8.79	1.54	4.05	3.98	2.8	141.13	54.81	32.8	59.7	61.52	55.24	1.99	0.74	37.44	17.86	KHG12117.1	Delta-1-pyrroline-5-carboxylate synthase [Gossypium arboreum]	GO:0008152(metabolic process);GO:0006561(proline biosynthetic process);GO:0055114(oxidation-reduction process)	GO:0005737(cytoplasm)	GO:0003824(catalytic activity);GO:0004349(glutamate 5-kinase activity);GO:0016740(transferase activity);GO:0016620(oxidoreductase activity, acting on the aldehyde or oxo group of donors, NAD or NADP as acceptor);GO:0004350(glutamate-5-semialdehyde dehydrogenase activity);GO:0016491(oxidoreductase activity)	K12657|ALDH18A1, P5CS|http://www.genome.jp/dbget-bin/www_bget?ko:K12657	ko00330(Arginine and proline metabolism);ko01230(Biosynthesis of amino acids)	KOG4165(E)(Gamma-glutamyl phosphate reductase)	sp|O04015|P5CS_ACTDE	sp|O04015|P5CS_ACTDE Delta-1-pyrroline-5-carboxylate synthase OS=Actinidia deliciosa PE=2 SV=1
proline biosynthetic process	Lus10040263.g	19.41	22.11	14.43	10.22	10.67	13.71	367.62	171.69	104.15	190.13	175.11	160.77	3.09	2.43	154.31	66.39	XP_010658318.1	PREDICTED: pyrroline-5-carboxylate synthetase isoform X1 [Vitis vinifera]	GO:0008152(metabolic process);GO:0006561(proline biosynthetic process);GO:0055114(oxidation-reduction process)	GO:0005737(cytoplasm)	GO:0004349(glutamate 5-kinase activity);GO:0016740(transferase activity);GO:0004350(glutamate-5-semialdehyde dehydrogenase activity);GO:0003824(catalytic activity);GO:0016620(oxidoreductase activity, acting on the aldehyde or oxo group of donors, NAD or NADP as acceptor);GO:0016491(oxidoreductase activity)	K12657|ALDH18A1, P5CS|http://www.genome.jp/dbget-bin/www_bget?ko:K12657	ko00330(Arginine and proline metabolism);ko01230(Biosynthesis of amino acids)	KOG1154(E)(Gamma-glutamyl kinase)	sp|P54888|P5CS2_ARATH;sp|O04015|P5CS_ACTDE	sp|P54888|P5CS2_ARATH Delta-1-pyrroline-5-carboxylate synthase B OS=Arabidopsis thaliana GN=P5CSB PE=2 SV=1;sp|O04015|P5CS_ACTDE Delta-1-pyrroline-5-carboxylate synthase OS=Actinidia deliciosa PE=2 SV=1
proline biosynthetic process	Lus10040264.g	29.87	34.98	28.89	34.25	27.79	27.78	540.32	492.77	276.18	322.45	591.29	570.99	23.18	21.3	631.94	424.5	XP_018809084.1	PREDICTED: delta-1-pyrroline-5-carboxylate synthase isoform X2 [Juglans regia]	GO:0008152(metabolic process);GO:0006561(proline biosynthetic process);GO:0055114(oxidation-reduction process)	GO:0005737(cytoplasm);GO:0005886(plasma membrane);GO:0016021(integral component of membrane);GO:0016020(membrane)	GO:0004349(glutamate 5-kinase activity);GO:0016740(transferase activity);GO:0004350(glutamate-5-semialdehyde dehydrogenase activity);GO:0003824(catalytic activity);GO:0016620(oxidoreductase activity, acting on the aldehyde or oxo group of donors, NAD or NADP as acceptor);GO:0016491(oxidoreductase activity)	K12657|ALDH18A1, P5CS|http://www.genome.jp/dbget-bin/www_bget?ko:K12657	ko00330(Arginine and proline metabolism);ko01230(Biosynthesis of amino acids)	KOG4165(E)(Gamma-glutamyl phosphate reductase)	sp|P54888|P5CS2_ARATH;sp|O04015|P5CS_ACTDE;sp|B8BD96|CSPLQ_ORYSI;sp|Q945M8|CSPLI_ARATH	sp|P54888|P5CS2_ARATH Delta-1-pyrroline-5-carboxylate synthase B OS=Arabidopsis thaliana GN=P5CSB PE=2 SV=1;sp|O04015|P5CS_ACTDE Delta-1-pyrroline-5-carboxylate synthase OS=Actinidia deliciosa PE=2 SV=1;sp|B8BD96|CSPLQ_ORYSI CASP-like protein 5B3 OS=Oryza sativa subsp. indica GN=OsI_30532 PE=3 SV=1;sp|Q945M8|CSPLI_ARATH CASP-like protein 5B2 OS=Arabidopsis thaliana GN=At3g53850 PE=2 SV=1
response to stress	C8308745.1	29.92	29.91	59.11	30.4	83.93	117.52	87.49	126.49	118.12	89.11	96.37	92.86	145.71	124.76	121.99	160.55	ACZ95470.1	disulfide isomerase-like protein, partial [Viola biflora]	GO:0045454(cell redox homeostasis);GO:0034976(response to endoplasmic reticulum stress);GO:0006457(protein folding)	GO:0005783(endoplasmic reticulum)	GO:0003756(protein disulfide isomerase activity);GO:0016853(isomerase activity)	K09584|PDIA6, TXNDC7|http://www.genome.jp/dbget-bin/www_bget?ko:K09584	ko04141(Protein processing in endoplasmic reticulum)	*	sp|O22263|PDI21_ARATH	sp|O22263|PDI21_ARATH Protein disulfide-isomerase like 2-1 OS=Arabidopsis thaliana GN=PDIL2-1 PE=2 SV=1
response to stress	Lus10000310.g	0.51	0.26	0.26	0.08	4.53	7.88	3019.93	3586.1	294.89	277.69	149.7	124.26	0.83	0.74	3019.28	2263.22	XP_017644879.1	PREDICTED: bidirectional sugar transporter SWEET15-like [Gossypium arboreum]	GO:0006810(transport);GO:0008643(carbohydrate transport);GO:0010150(leaf senescence);GO:0071470(cellular response to osmotic stress);GO:0015770(sucrose transport)	GO:0016021(integral component of membrane);GO:0016020(membrane);GO:0005887(integral component of plasma membrane);GO:0005886(plasma membrane)	GO:0008515(sucrose transmembrane transporter activity);GO:0051119(sugar transmembrane transporter activity)	K15382|SLC50A, SWEET|http://www.genome.jp/dbget-bin/www_bget?ko:K15382	*	*	sp|Q9FY94|SWT15_ARATH;sp|P93332|NOD3_MEDTR	sp|Q9FY94|SWT15_ARATH Bidirectional sugar transporter SWEET15 OS=Arabidopsis thaliana GN=SWEET15 PE=1 SV=1;sp|P93332|NOD3_MEDTR Bidirectional sugar transporter N3 OS=Medicago truncatula GN=N3 PE=2 SV=1
response to stress	Lus10000417.g	1.97	2.06	4.16	1.91	8.53	14.56	6.56	9.63	3.43	2.76	1.89	2.31	11.31	8.91	14.54	11.56	OAY32086.1	hypothetical protein MANES_14G165300 [Manihot esculenta]	GO:0006952(defense response)	*	GO:0043531(ADP binding);GO:0016787(hydrolase activity);GO:0004721(phosphoprotein phosphatase activity)	*	*	*	sp|Q9LRR4|R13L1_ARATH;sp|Q9LRR5|DRL21_ARATH	sp|Q9LRR4|R13L1_ARATH Putative disease resistance RPP13-like protein 1 OS=Arabidopsis thaliana GN=RPPL1 PE=3 SV=1;sp|Q9LRR5|DRL21_ARATH Putative disease resistance protein At3g14460 OS=Arabidopsis thaliana GN=At3g14460 PE=3 SV=1
response to stress	Lus10000652.g	2.56	1.91	4.61	4.28	3.48	2.81	6.58	6.77	7.31	6.38	14	13.09	3.63	2.95	6.3	4.36	XP_012092547.1	PREDICTED: DNA repair helicase UVH6 isoform X2 [Jatropha curcas]	GO:0006289(nucleotide-excision repair);GO:0006139(nucleobase-containing compound metabolic process);GO:0009408(response to heat);GO:0006281(DNA repair);GO:0009411(response to UV)	GO:0005634(nucleus)	GO:0004003(ATP-dependent DNA helicase activity);GO:0003677(DNA binding);GO:0016818(hydrolase activity, acting on acid anhydrides, in phosphorus-containing anhydrides);GO:0008026(ATP-dependent helicase activity);GO:0003676(nucleic acid binding);GO:0005524(ATP binding);GO:0004386(helicase activity);GO:0000166(nucleotide binding);GO:0016787(hydrolase activity)	K10844|ERCC2, XPD|http://www.genome.jp/dbget-bin/www_bget?ko:K10844	ko03420(Nucleotide excision repair);ko03022(Basal transcription factors)	KOG1131(KL)(RNA polymerase II transcription initiation/nucleotide excision repair factor TFIIH, 5'-3' helicase subunit RAD3)	sp|Q8W4M7|ERCC2_ARATH	sp|Q8W4M7|ERCC2_ARATH DNA repair helicase XPD OS=Arabidopsis thaliana GN=XPD PE=1 SV=1
response to stress	Lus10000659.g	4.75	3.5	3.98	5.96	0.44	2.69	51.17	41.61	150.16	140.46	144.06	119.84	2.48	1.63	43.67	47.89	XP_007050675.2	PREDICTED: EID1-like F-box protein 3 [Theobroma cacao]	GO:0010228(vegetative to reproductive phase transition of meristem);GO:0009738(abscisic acid-activated signaling pathway);GO:0010029(regulation of seed germination);GO:0009414(response to water deprivation);GO:0006970(response to osmotic stress);GO:0009651(response to salt stress);GO:0009737(response to abscisic acid)	GO:0005634(nucleus)	*	*	*	*	sp|Q93ZT5|EDL3_ARATH	sp|Q93ZT5|EDL3_ARATH EID1-like F-box protein 3 OS=Arabidopsis thaliana GN=EDL3 PE=2 SV=1
response to stress	Lus10000685.g	5.68	6.81	7.45	5.23	7.37	9.45	11.77	14.9	21.51	14.29	13.13	15.56	11.69	11.01	19.61	20.65	XP_008219825.1	PREDICTED: endonuclease V isoform X1 [Prunus mume]	GO:0006281(DNA repair)	*	GO:0004519(endonuclease activity)	K05982|E3.1.21.7, nfi|http://www.genome.jp/dbget-bin/www_bget?ko:K05982	*	KOG4417(R)(Predicted endonuclease)	sp|Q8C9A2|ENDOV_MOUSE;sp|Q8N8Q3|ENDOV_HUMAN	sp|Q8C9A2|ENDOV_MOUSE Endonuclease V OS=Mus musculus GN=Endov PE=1 SV=2;sp|Q8N8Q3|ENDOV_HUMAN Endonuclease V OS=Homo sapiens GN=ENDOV PE=1 SV=1
response to stress	Lus10000998.g	0.99	0.93	2.47	2.25	1.16	1.92	1.69	2.28	1.85	1.4	4.75	5.41	4.87	4.55	9.02	8.93	XP_016704803.1	PREDICTED: DNA repair endonuclease UVH1-like isoform X1 [Gossypium hirsutum]	GO:0006259(DNA metabolic process);GO:0006296(nucleotide-excision repair, DNA incision, 5'-to lesion);GO:1901255(nucleotide-excision repair involved in interstrand cross-link repair);GO:0000712(resolution of meiotic recombination intermediates);GO:0000724(double-strand break repair via homologous recombination)	GO:0000110(nucleotide-excision repair factor 1 complex)	GO:0003677(DNA binding);GO:0004518(nuclease activity);GO:0000014(single-stranded DNA endodeoxyribonuclease activity);GO:0003697(single-stranded DNA binding);GO:0003684(damaged DNA binding);GO:0004519(endonuclease activity)	K10848|ERCC4, XPF|http://www.genome.jp/dbget-bin/www_bget?ko:K10848	ko03420(Nucleotide excision repair)	KOG0442(L)(Structure-specific endonuclease ERCC1-XPF, catalytic component XPF/ERCC4)	sp|Q9LKI5|XPF_ARATH	sp|Q9LKI5|XPF_ARATH DNA repair endonuclease UVH1 OS=Arabidopsis thaliana GN=UVH1 PE=1 SV=2
response to stress	Lus10001041.g	1.14	0.24	406.75	15.96	18.54	3.44	6.27	4.51	1.25	3.66	0	0	96.94	51.35	4.07	0.88	AIU47281.1	amaranthin-like lectin [Linum usitatissimum]	GO:0009607(response to biotic stimulus);GO:0006952(defense response)	*	*	*	*	*	*	*
response to stress	Lus10001137.g	0.72	0.16	0.23	0.27	1.22	1.02	2.83	3.31	1.48	2.03	1.24	0.93	1.21	1.32	3.15	4.9	OAY52000.1	hypothetical protein MANES_04G049600 [Manihot esculenta]	GO:0016310(phosphorylation);GO:0006468(protein phosphorylation);GO:0009814(defense response, incompatible interaction);GO:0000165(MAPK cascade);GO:0000187(activation of MAPK activity)	GO:0005737(cytoplasm)	GO:0004672(protein kinase activity);GO:0005524(ATP binding);GO:0004674(protein serine/threonine kinase activity);GO:0016301(kinase activity);GO:0016740(transferase activity);GO:0000166(nucleotide binding);GO:0004708(MAP kinase kinase activity);GO:0004707(MAP kinase activity);GO:0004702(signal transducer, downstream of receptor, with serine/threonine kinase activity)	K20607|MKK3|http://www.genome.jp/dbget-bin/www_bget?ko:K20607	ko04016(MAPK signaling pathway - plant)	KOG0581(T)(Mitogen-activated protein kinase kinase (MAP2K))	sp|O80396|M2K3_ARATH	sp|O80396|M2K3_ARATH Mitogen-activated protein kinase kinase 3 OS=Arabidopsis thaliana GN=MKK3 PE=1 SV=1
response to stress	Lus10001473.g	2.24	1.61	1.99	1.73	0.74	5.24	5.34	6.11	23.82	15.35	15.25	13.21	1.71	1.87	4.41	10.28	XP_011012875.1	PREDICTED: protein pleiotropic regulatory locus 1-like isoform X1 [Populus euphratica]	GO:0000398(mRNA splicing, via spliceosome);GO:0048366(leaf development);GO:0045892(negative regulation of transcription, DNA-templated);GO:0016567(protein ubiquitination);GO:0002376(immune system process);GO:0006952(defense response);GO:0045087(innate immune response);GO:0042742(defense response to bacterium);GO:0010182(sugar mediated signaling pathway);GO:0009755(hormone-mediated signaling pathw…	GO:0071011(precatalytic spliceosome);GO:0080008(Cul4-RING E3 ubiquitin ligase complex);GO:0000974(Prp19 complex);GO:0005662(DNA replication factor A complex);GO:0071013(catalytic step 2 spliceosome);GO:0005634(nucleus)	GO:0005515(protein binding);GO:0000166(nucleotide binding)	K12862|PLRG1, PRL1, PRP46|http://www.genome.jp/dbget-bin/www_bget?ko:K12862	ko03040(Spliceosome)	KOG0285(A)(Pleiotropic regulator 1);KOG0266(R)(WD40 repeat-containing protein)	sp|Q42384|PRL1_ARATH	sp|Q42384|PRL1_ARATH Protein pleiotropic regulatory locus 1 OS=Arabidopsis thaliana GN=PRL1 PE=1 SV=1
response to stress	Lus10001719.g	69.09	70.68	100	69.8	181.54	161.48	230.87	221.44	154.52	156.94	148.81	175.94	216.85	204.04	207.39	205.64	XP_006382702.1	Cu/Zn superoxide dismutase family protein [Populus trichocarpa]	GO:0019430(removal of superoxide radicals);GO:0055114(oxidation-reduction process);GO:0006801(superoxide metabolic process)	GO:0005737(cytoplasm)	GO:0008270(zinc ion binding);GO:0046872(metal ion binding);GO:0005507(copper ion binding);GO:0004784(superoxide dismutase activity);GO:0016491(oxidoreductase activity)	K04565|SOD1|http://www.genome.jp/dbget-bin/www_bget?ko:K04565	ko04146(Peroxisome)	KOG0441(P)(Cu2+/Zn2+ superoxide dismutase SOD1)	sp|Q07796|SODC_IPOBA;sp|P93258|SODC1_MESCR	sp|Q07796|SODC_IPOBA Superoxide dismutase [Cu-Zn] OS=Ipomoea batatas GN=SODCC PE=2 SV=2;sp|P93258|SODC1_MESCR Superoxide dismutase [Cu-Zn] 1 OS=Mesembryanthemum crystallinum GN=SODCC.1 PE=2 SV=1
response to stress	Lus10001862.g	2.83	3.01	3.6	3.21	8.8	9.78	17.5	16.39	11.99	11.21	9.65	11.09	7.45	8.19	16.22	13.41	XP_012068876.1	PREDICTED: probable GTP diphosphokinase RSH2, chloroplastic [Jatropha curcas]	GO:0015969(guanosine tetraphosphate metabolic process);GO:0042594(response to starvation)	GO:0009507(chloroplast)	GO:0008893(guanosine-3',5'-bis(diphosphate) 3'-diphosphatase activity);GO:0008728(GTP diphosphokinase activity)	*	*	*	sp|Q9SYH1|RSH3C_ARATH	sp|Q9SYH1|RSH3C_ARATH Probable GTP diphosphokinase RSH3, chloroplastic OS=Arabidopsis thaliana GN=RSH3 PE=2 SV=1
response to stress	Lus10001876.g	0.2	0.71	0.64	0.32	0.28	0.83	2.99	2.59	2.29	2.48	1.78	2.17	0.75	0.58	2.5	1.44	ACU15464.1	unknown [Glycine max]	GO:0009269(response to desiccation)	*	*	*	*	*	sp|P46519|LEA14_SOYBN	sp|P46519|LEA14_SOYBN Desiccation protectant protein Lea14 homolog OS=Glycine max PE=2 SV=1
response to stress	Lus10002216.g	0.29	0.09	0.25	0.2	0.58	0.5	1.41	0.71	0.59	0.84	1.05	0.44	0.66	0.46	1.25	0.52	XP_012089813.1	PREDICTED: transcription factor bHLH140 [Jatropha curcas]	GO:0006281(DNA repair)	*	GO:0003824(catalytic activity);GO:0003677(DNA binding);GO:0033699(DNA 5'-adenosine monophosphate hydrolase activity)	K10863|APTX|http://www.genome.jp/dbget-bin/www_bget?ko:K10863	*	KOG0562(R)(Predicted hydrolase (HIT family))	sp|Q9M041|BH140_ARATH	sp|Q9M041|BH140_ARATH Transcription factor bHLH140 OS=Arabidopsis thaliana GN=BHLH140 PE=3 SV=1
response to stress	Lus10002477.g	15.94	12.01	12.52	17.67	54.57	41.52	68.22	81.5	47.92	45.35	50.44	40.19	66.12	51.11	47.28	34.85	XP_006387427.1	hypothetical protein POPTR_1048s00200g [Populus trichocarpa]	GO:0006952(defense response)	*	*	*	*	*	sp|Q9LZX1|LOR15_ARATH	sp|Q9LZX1|LOR15_ARATH Protein LURP-one-related 15 OS=Arabidopsis thaliana GN=At5g01750 PE=1 SV=1
response to stress	Lus10002578.g	6.71	7.42	8.93	7.26	9.05	10.89	15.71	14.65	23.48	23.67	19.03	17.31	16.08	12.04	21.71	19.29	OAY42512.1	hypothetical protein MANES_09G185700 [Manihot esculenta]	GO:0034051(negative regulation of plant-type hypersensitive response)	GO:0005622(intracellular);GO:0016020(membrane);GO:0016021(integral component of membrane);GO:0005886(plasma membrane)	GO:0008270(zinc ion binding)	K19363|LITAF|http://www.genome.jp/dbget-bin/www_bget?ko:K19363	*	*	sp|Q9C7E8|COL15_ARATH	sp|Q9C7E8|COL15_ARATH Zinc finger protein CONSTANS-LIKE 15 OS=Arabidopsis thaliana GN=COL15 PE=2 SV=1
response to stress	Lus10002674.g	7.15	7.5	10.1	8.28	18.22	19.32	36.16	33.68	24.66	23.59	21.48	24.06	16.39	13.82	28.67	25.83	XP_002320234.1	metal tolerance protein 1 [Populus trichocarpa]	GO:0010043(response to zinc ion);GO:0061088(regulation of sequestering of zinc ion);GO:0055085(transmembrane transport);GO:0006812(cation transport);GO:0010312(detoxification of zinc ion);GO:0010299(detoxification of cobalt ion);GO:0006810(transport);GO:0006829(zinc II ion transport);GO:0006811(ion transport)	GO:0016021(integral component of membrane);GO:0016020(membrane);GO:0005773(vacuole);GO:0009705(plant-type vacuole membrane);GO:0005774(vacuolar membrane)	GO:0005385(zinc ion transmembrane transporter activity);GO:0008324(cation transmembrane transporter activity);GO:0046872(metal ion binding);GO:0015103(inorganic anion transmembrane transporter activity);GO:0015562(efflux transmembrane transporter activity)	K14689|SLC30A2, ZNT2|http://www.genome.jp/dbget-bin/www_bget?ko:K14689	*	KOG1483(P)(Zn2+ transporter ZNT1 and related Cd2+/Zn2+ transporters (cation diffusion facilitator superfamily))	sp|Q9M271|MTPA1_ARATH	sp|Q9M271|MTPA1_ARATH Metal tolerance protein A1 OS=Arabidopsis thaliana GN=MTPA1 PE=2 SV=1
response to stress	Lus10002733.g	147.88	138.38	143.52	134.61	440.09	416.91	1068.13	1146.19	815.63	795.16	786.97	798.94	378.67	347.57	982.71	1155.56	XP_007010484.1	PREDICTED: dnaJ protein homolog [Theobroma cacao]	GO:0009408(response to heat);GO:0006457(protein folding)	GO:0016021(integral component of membrane);GO:0016020(membrane)	GO:0051082(unfolded protein binding);GO:0046872(metal ion binding);GO:0005524(ATP binding);GO:0031072(heat shock protein binding)	K09503|DNAJA2|http://www.genome.jp/dbget-bin/www_bget?ko:K09503	ko04141(Protein processing in endoplasmic reticulum)	KOG0712(O)(Molecular chaperone (DnaJ superfamily))	sp|Q04960|DNJH_CUCSA;sp|Q03363|DNJH1_ALLPO	sp|Q04960|DNJH_CUCSA DnaJ protein homolog OS=Cucumis sativus GN=DNAJ1 PE=2 SV=1;sp|Q03363|DNJH1_ALLPO DnaJ protein homolog 1 (Fragment) OS=Allium porrum GN=DNAJ1 PE=2 SV=1
response to stress	Lus10002737.g	0.22	0.04	0.17	0.16	0.64	0.81	2.02	1.68	1.38	0.75	0.92	1.09	0.24	0.94	1.6	1.06	OAY24929.1	hypothetical protein MANES_17G055200 [Manihot esculenta]	GO:0006952(defense response);GO:0007165(signal transduction)	*	GO:0004721(phosphoprotein phosphatase activity);GO:0043531(ADP binding);GO:0016787(hydrolase activity)	*	*	*	sp|Q9LRR5|DRL21_ARATH;sp|Q7XA40|RGA3_SOLBU	sp|Q9LRR5|DRL21_ARATH Putative disease resistance protein At3g14460 OS=Arabidopsis thaliana GN=At3g14460 PE=3 SV=1;sp|Q7XA40|RGA3_SOLBU Putative disease resistance protein RGA3 OS=Solanum bulbocastanum GN=RGA3 PE=2 SV=2
response to stress	Lus10002899.g	7.46	8.19	8.81	6.61	6.53	8.44	17.85	13.84	14.29	19.69	15.51	16.99	8.83	10.85	22.66	24.22	XP_012076603.1	PREDICTED: transcription initiation factor TFIID subunit 11 [Jatropha curcas]	GO:0010118(stomatal movement);GO:0031347(regulation of defense response);GO:2000022(regulation of jasmonic acid mediated signaling pathway);GO:0009867(jasmonic acid mediated signaling pathway);GO:0009620(response to fungus);GO:0002229(defense response to oomycetes);GO:0009738(abscisic acid-activated signaling pathway);GO:0009787(regulation of abscisic acid-activated signaling pathway);GO:0009682(…	GO:0005634(nucleus)	GO:0003677(DNA binding)	*	*	*	sp|Q8H0V5|OCP3_ARATH	sp|Q8H0V5|OCP3_ARATH Protein OVEREXPRESSOR OF CATIONIC PEROXIDASE 3 OS=Arabidopsis thaliana GN=OCP3 PE=1 SV=1
response to stress	Lus10003265.g	27.26	102.9	53.7	46.54	181.36	26.92	2134.24	454.96	313.97	1097.53	1083.27	256.15	186.1	44.5	3552.54	838.67	XP_006424015.1	hypothetical protein CICLE_v10029328mg [Citrus clementina]	GO:0042742(defense response to bacterium);GO:0050832(defense response to fungus)	*	GO:0008061(chitin binding)	*	*	*	sp|P09761|WIN1_SOLTU	sp|P09761|WIN1_SOLTU Wound-induced protein WIN1 OS=Solanum tuberosum GN=WIN1 PE=2 SV=1
response to stress	Lus10003398.g	5.12	5.92	3.73	5.35	14.72	18.69	64.32	69.42	21.41	20.43	16.93	13.98	13.04	12.02	30.7	37.49	XP_002318386.2	hypothetical protein POPTR_0012s01730g [Populus trichocarpa]	GO:0006596(polyamine biosynthetic process);GO:0006595(polyamine metabolic process);GO:0006597(spermine biosynthetic process);GO:0042742(defense response to bacterium)	GO:0005634(nucleus);GO:0005737(cytoplasm)	GO:0016740(transferase activity);GO:0004766(spermidine synthase activity);GO:0003824(catalytic activity);GO:0005515(protein binding);GO:0016768(spermine synthase activity)	K00797|speE, SRM|http://www.genome.jp/dbget-bin/www_bget?ko:K00797	ko00330(Arginine and proline metabolism);ko00270(Cysteine and methionine metabolism);ko00480(Glutathione metabolism);ko00410(beta-Alanine metabolism)	KOG1562(E)(Spermidine synthase)	sp|Q94BN2|SPSY_ARATH	sp|Q94BN2|SPSY_ARATH Spermine synthase OS=Arabidopsis thaliana GN=SPMS PE=1 SV=1
response to stress	Lus10003421.g	61.43	62.79	82.5	74.77	131.56	96.7	322.21	293.34	165.25	163.22	176.35	159.91	143.14	89.7	265.12	257.93	XP_002308711.2	hypothetical protein POPTR_0006s28120g [Populus trichocarpa]	GO:0055114(oxidation-reduction process);GO:0006979(response to oxidative stress)	*	GO:0004602(glutathione peroxidase activity);GO:0016491(oxidoreductase activity);GO:0004601(peroxidase activity)	K00432|gpx|http://www.genome.jp/dbget-bin/www_bget?ko:K00432	ko00590(Arachidonic acid metabolism);ko00480(Glutathione metabolism)	KOG1651(O)(Glutathione peroxidase)	sp|Q9SZ54|GPX7_ARATH	sp|Q9SZ54|GPX7_ARATH Putative glutathione peroxidase 7, chloroplastic OS=Arabidopsis thaliana GN=GPX7 PE=3 SV=2
response to stress	Lus10003437.g	23.37	22.03	32.95	44.04	72.72	43.3	505.24	398.48	244.67	275.5	99.35	111.85	33.89	44	239.41	151.77	XP_017627641.1	PREDICTED: thioredoxin-like 1-1, chloroplastic [Gossypium arboreum]	GO:0045454(cell redox homeostasis);GO:0006662(glycerol ether metabolic process);GO:0000103(sulfate assimilation);GO:0006457(protein folding);GO:0034599(cellular response to oxidative stress);GO:0055114(oxidation-reduction process)	GO:0009507(chloroplast)	GO:0015035(protein disulfide oxidoreductase activity);GO:0016671(oxidoreductase activity, acting on a sulfur group of donors, disulfide as acceptor)	*	*	KOG0907(O)(Thioredoxin)	sp|O64654|TRL11_ARATH	sp|O64654|TRL11_ARATH Thioredoxin-like 1-1, chloroplastic OS=Arabidopsis thaliana GN=At1g08570 PE=2 SV=1
response to stress	Lus10003611.g	61.97	59.7	99.34	76.07	139.29	103.03	408.09	293.82	272.77	295.18	290.32	266.6	159.19	206.23	512.7	260.54	EOY16019.1	Annexin 1 [Theobroma cacao]	GO:0070588(calcium ion transmembrane transport);GO:0006970(response to osmotic stress);GO:0055114(oxidation-reduction process);GO:0009737(response to abscisic acid);GO:0071435(potassium ion export)	GO:0005739(mitochondrion);GO:0005886(plasma membrane);GO:0005829(cytosol);GO:0009579(thylakoid);GO:0016020(membrane);GO:0009507(chloroplast);GO:0005773(vacuole);GO:0005618(cell wall);GO:0009570(chloroplast stroma);GO:0009506(plasmodesma)	GO:0005524(ATP binding);GO:0005509(calcium ion binding);GO:0005507(copper ion binding);GO:0005544(calcium-dependent phospholipid binding);GO:0042803(protein homodimerization activity);GO:0004601(peroxidase activity);GO:0008270(zinc ion binding)	K17095|ANXA7_11|http://www.genome.jp/dbget-bin/www_bget?ko:K17095	*	KOG0819(U)(Annexin)	sp|Q9SYT0|ANXD1_ARATH	sp|Q9SYT0|ANXD1_ARATH Annexin D1 OS=Arabidopsis thaliana GN=ANN1 PE=1 SV=1
response to stress	Lus10003660.g	0	0.08	0.03	0	0.34	0.41	15.9	21.36	1.19	1.82	0.84	0.61	0.26	0.32	21.41	13.5	EOY28558.1	Cysteine-rich RLK 29, putative isoform 2 [Theobroma cacao]	GO:0006468(protein phosphorylation);GO:0016310(phosphorylation);GO:0006952(defense response);GO:0009751(response to salicylic acid);GO:0012501(programmed cell death);GO:0042742(defense response to bacterium)	GO:0016020(membrane);GO:0016021(integral component of membrane);GO:0005576(extracellular region);GO:0005886(plasma membrane);GO:0009506(plasmodesma);GO:0009507(chloroplast)	GO:0004672(protein kinase activity);GO:0004674(protein serine/threonine kinase activity);GO:0005524(ATP binding);GO:0016301(kinase activity);GO:0000166(nucleotide binding)	*	*	*	sp|Q8S9L6|CRK29_ARATH;sp|Q9M0X5|CRK25_ARATH;sp|O23081|CRK41_ARATH	sp|Q8S9L6|CRK29_ARATH Cysteine-rich receptor-like protein kinase 29 OS=Arabidopsis thaliana GN=CRK29 PE=2 SV=1;sp|Q9M0X5|CRK25_ARATH Cysteine-rich receptor-like protein kinase 25 OS=Arabidopsis thaliana GN=CRK25 PE=3 SV=1;sp|O23081|CRK41_ARATH Cysteine-rich receptor-like protein kinase 41 OS=Arabidopsis thaliana GN=CRK41 PE=3 SV=2
response to stress	Lus10004055.g	1.5	1.3	1.51	1.27	1.52	0.93	3.8	3.67	5.78	5.64	4.96	5.37	1.08	1.52	3.58	3.32	XP_002305874.2	hypothetical protein POPTR_0004s08580g [Populus trichocarpa]	GO:0006289(nucleotide-excision repair);GO:0006298(mismatch repair)	GO:0005737(cytoplasm);GO:0000111(nucleotide-excision repair factor 2 complex);GO:0009507(chloroplast);GO:0071942(XPC complex);GO:0005634(nucleus)	GO:0003677(DNA binding);GO:0003697(single-stranded DNA binding);GO:0003684(damaged DNA binding)	K10838|XPC|http://www.genome.jp/dbget-bin/www_bget?ko:K10838	ko03420(Nucleotide excision repair)	KOG2179(L)(Nucleotide excision repair complex XPC-HR23B, subunit XPC/DPB11)	sp|Q8W489|RAD4_ARATH	sp|Q8W489|RAD4_ARATH DNA repair protein RAD4 OS=Arabidopsis thaliana GN=RAD4 PE=1 SV=1
response to stress	Lus10004109.g	23.59	25.12	28.15	25.32	122.05	67.63	84.54	71	49.03	55.55	51.76	48.64	74.22	62.45	65.53	49.69	XP_002313505.1	seed maturation protein PM37 [Populus trichocarpa]	GO:0009408(response to heat);GO:0006457(protein folding)	*	GO:0005524(ATP binding);GO:0031072(heat shock protein binding);GO:0051082(unfolded protein binding);GO:0046872(metal ion binding)	K09503|DNAJA2|http://www.genome.jp/dbget-bin/www_bget?ko:K09503	ko04141(Protein processing in endoplasmic reticulum)	KOG0712(O)(Molecular chaperone (DnaJ superfamily))	sp|P42824|DNJH2_ALLPO	sp|P42824|DNJH2_ALLPO DnaJ protein homolog 2 OS=Allium porrum GN=LDJ2 PE=2 SV=1
response to stress	Lus10004289.g	54.47	45.82	29.8	42.25	88.53	101.65	586.6	847.82	347.46	248.19	236.34	210.01	59.94	127.85	560.74	311.81	ACU13843.1	unknown [Glycine max]	GO:0031640(killing of cells of other organism);GO:0006952(defense response);GO:0050832(defense response to fungus)	*	*	*	*	*	sp|Q07502|DEF_SOYBN	sp|Q07502|DEF_SOYBN Defensin-like protein OS=Glycine max PE=3 SV=1
response to stress	Lus10004297.g	1.33	0	2.44	1.05	27.15	15.61	40.99	9.68	29.67	21.23	13.08	4.65	22.27	41.63	5.35	5.81	JAU96859.1	hypothetical protein MP_TR4091_c0_g1_i1_g.10823, partial [Noccaea caerulescens]	GO:0009611(response to wounding)	GO:0005634(nucleus)	GO:0003674(molecular_function)	*	*	*	*	*
response to stress	Lus10004462.g	1.72	2.01	1.17	1.54	4.55	5.85	6.46	5.35	3.32	6.31	3.73	3.84	3.21	3.51	5.45	5.79	XP_006382624.1	hypothetical protein POPTR_0005s03890g [Populus trichocarpa]	GO:0006294(nucleotide-excision repair, preincision complex assembly);GO:0010213(non-photoreactive DNA repair);GO:0010332(response to gamma radiation);GO:0006281(DNA repair);GO:0000724(double-strand break repair via homologous recombination);GO:0010224(response to UV-B)	GO:0005634(nucleus)	GO:0017108(5'-flap endonuclease activity);GO:0003684(damaged DNA binding);GO:0004519(endonuclease activity)	K10849|ERCC1|http://www.genome.jp/dbget-bin/www_bget?ko:K10849	ko03420(Nucleotide excision repair)	KOG2841(L)(Structure-specific endonuclease ERCC1-XPF, ERCC1 component)	sp|Q9MA98|ERCC1_ARATH	sp|Q9MA98|ERCC1_ARATH DNA excision repair protein ERCC-1 OS=Arabidopsis thaliana GN=ERCC1 PE=2 SV=1
response to stress	Lus10004464.g	1.75	0.86	0.8	1.35	1.09	1.67	2.91	3.05	4.07	4.86	2.76	3.22	1.3	1.12	1.82	2.78	XP_018820830.1	PREDICTED: DNA repair protein XRCC3 homolog [Juglans regia]	GO:0006281(DNA repair);GO:0007131(reciprocal meiotic recombination);GO:0006302(double-strand break repair);GO:0006312(mitotic recombination);GO:0045003(double-strand break repair via synthesis-dependent strand annealing);GO:0042148(strand invasion);GO:0000707(meiotic DNA recombinase assembly);GO:0010212(response to ionizing radiation);GO:0007126(meiotic cell cycle)	GO:0033063(Rad51B-Rad51C-Rad51D-XRCC2 complex);GO:0005657(replication fork)	GO:0008094(DNA-dependent ATPase activity);GO:0003677(DNA binding);GO:0005524(ATP binding);GO:0003697(single-stranded DNA binding);GO:0004520(endodeoxyribonuclease activity);GO:0003690(double-stranded DNA binding);GO:0000150(recombinase activity);GO:0000400(four-way junction DNA binding)	K10880|XRCC3|http://www.genome.jp/dbget-bin/www_bget?ko:K10880	ko03440(Homologous recombination)	KOG1564(L)(DNA repair protein RHP57)	sp|Q9FKM5|XRCC3_ARATH	sp|Q9FKM5|XRCC3_ARATH DNA repair protein XRCC3 homolog OS=Arabidopsis thaliana GN=XRCC3 PE=1 SV=1
response to stress	Lus10005134.g	8.7	9.24	13.82	11.34	112.76	249.19	146.98	214.12	4.86	1.83	2.83	1.9	197.95	238.67	404.59	312.02	OAY62063.1	hypothetical protein MANES_01G239000 [Manihot esculenta]	GO:0006351(transcription, DNA-templated);GO:0006355(regulation of transcription, DNA-templated);GO:0045893(positive regulation of transcription, DNA-templated);GO:0042754(negative regulation of circadian rhythm);GO:0045892(negative regulation of transcription, DNA-templated);GO:0043496(regulation of protein homodimerization activity);GO:0007623(circadian rhythm);GO:0009409(response to cold)	GO:0005634(nucleus)	GO:0003677(DNA binding);GO:0043565(sequence-specific DNA binding)	K12133|LHY|http://www.genome.jp/dbget-bin/www_bget?ko:K12133	ko04712(Circadian rhythm - plant)	*	sp|Q6R0H1|LHY_ARATH	sp|Q6R0H1|LHY_ARATH Protein LHY OS=Arabidopsis thaliana GN=LHY PE=1 SV=2
response to stress	Lus10005218.g	0.53	0.48	0.37	0.42	1.54	1.34	2.25	2.36	1.03	0.93	1.6	1.47	1.59	1.3	3.39	2.33	XP_002526758.1	PREDICTED: putative disease resistance protein RGA4 [Ricinus communis]	GO:0006952(defense response)	*	GO:0004721(phosphoprotein phosphatase activity);GO:0043531(ADP binding);GO:0016787(hydrolase activity)	*	*	*	sp|Q7XA40|RGA3_SOLBU	sp|Q7XA40|RGA3_SOLBU Putative disease resistance protein RGA3 OS=Solanum bulbocastanum GN=RGA3 PE=2 SV=2
response to stress	Lus10005321.g	0.66	0.91	1.5	0.74	2.95	2.69	3.44	2.48	2.37	2.4	2.02	1.57	6.15	3.59	3.78	4.08	OAY32086.1	hypothetical protein MANES_14G165300 [Manihot esculenta]	GO:0006952(defense response)	*	GO:0043531(ADP binding)	*	*	*	sp|Q9LRR4|R13L1_ARATH	sp|Q9LRR4|R13L1_ARATH Putative disease resistance RPP13-like protein 1 OS=Arabidopsis thaliana GN=RPPL1 PE=3 SV=1
response to stress	Lus10005364.g	2.88	5.18	6.95	4.82	9.06	11.94	17.08	16.41	12.54	11.76	12.06	11.89	11.83	12.64	19.01	17.14	OIW19969.1	hypothetical protein TanjilG_30945 [Lupinus angustifolius]	GO:0016310(phosphorylation);GO:0006468(protein phosphorylation);GO:0006979(response to oxidative stress)	*	GO:0004672(protein kinase activity);GO:0004674(protein serine/threonine kinase activity);GO:0016301(kinase activity);GO:0005524(ATP binding);GO:0000166(nucleotide binding)	K08832|SRPK3, STK23|http://www.genome.jp/dbget-bin/www_bget?ko:K08832	*	KOG0671(T)(LAMMER dual specificity kinases);KOG1290(T)(Serine/threonine protein kinase)	sp|P36616|DSK1_SCHPO	sp|P36616|DSK1_SCHPO Protein kinase dsk1 OS=Schizosaccharomyces pombe (strain 972 / ATCC 24843) GN=dsk1 PE=3 SV=2
response to stress	Lus10005588.g	0.27	0.21	1.8	0.37	3.71	2.36	1.32	1	0.88	0.93	0.59	0.28	7.55	3.03	1.8	2.22	OAY58695.1	hypothetical protein MANES_02G199900 [Manihot esculenta]	GO:0007165(signal transduction);GO:0006952(defense response)	GO:0016020(membrane);GO:0016021(integral component of membrane)	GO:0043531(ADP binding)	*	*	*	sp|Q40392|TMVRN_NICGU;sp|O48573|LAZ5_ARATH	sp|Q40392|TMVRN_NICGU TMV resistance protein N OS=Nicotiana glutinosa GN=N PE=1 SV=1;sp|O48573|LAZ5_ARATH Disease resistance protein LAZ5 OS=Arabidopsis thaliana GN=LAZ5 PE=1 SV=1
response to stress	Lus10005652.g	17.09	18.51	39.97	13.84	143.58	163.77	6633.25	6881.25	2650.92	2978.5	757.28	1028.97	63.33	44.32	3930.48	1668.29	XP_010416529.1	PREDICTED: dehydrin ERD14-like [Camelina sativa]	GO:0006950(response to stress);GO:0009415(response to water);GO:0009739(response to gibberellin);GO:0009631(cold acclimation);GO:0009269(response to desiccation);GO:0009737(response to abscisic acid);GO:0009409(response to cold);GO:0009414(response to water deprivation)	GO:0005886(plasma membrane);GO:0005829(cytosol);GO:0009507(chloroplast);GO:0005794(Golgi apparatus);GO:0005634(nucleus);GO:0016020(membrane)	GO:0005509(calcium ion binding)	*	*	*	sp|P42763|ERD14_ARATH;sp|P31168|COR47_ARATH;sp|P46524|CO410_WHEAT	sp|P42763|ERD14_ARATH Dehydrin ERD14 OS=Arabidopsis thaliana GN=ERD14 PE=1 SV=1;sp|P31168|COR47_ARATH Dehydrin COR47 OS=Arabidopsis thaliana GN=COR47 PE=1 SV=2;sp|P46524|CO410_WHEAT Dehydrin COR410 OS=Triticum aestivum GN=COR410 PE=2 SV=1
response to stress	Lus10005743.g	0.12	0.15	0.09	0.05	0.2	0.23	0.51	0.43	0.64	0.61	0.67	0.53	0.06	0.12	0.25	0.41	XP_011048700.1	PREDICTED: DNA mismatch repair protein MSH3 [Populus euphratica]	GO:0006298(mismatch repair);GO:0007131(reciprocal meiotic recombination);GO:0000710(meiotic mismatch repair)	GO:0016021(integral component of membrane);GO:0016020(membrane);GO:0032300(mismatch repair complex);GO:0000228(nuclear chromosome)	GO:0005524(ATP binding);GO:0030983(mismatched DNA binding);GO:0003684(damaged DNA binding)	K08736|MSH3|http://www.genome.jp/dbget-bin/www_bget?ko:K08736	ko03430(Mismatch repair)	KOG0217(L)(Mismatch repair ATPase MSH6 (MutS family))	sp|O65607|MSH3_ARATH	sp|O65607|MSH3_ARATH DNA mismatch repair protein MSH3 OS=Arabidopsis thaliana GN=MSH3 PE=1 SV=2
response to stress	Lus10005783.g	0.84	0.9	0.95	0.71	3.19	2.83	9.51	10.49	5.2	6.37	4.04	3.98	3.86	2.73	9.12	6.83	BAF03493.1	Ku70 homolog [Populus nigra]	GO:0071480(cellular response to gamma radiation);GO:0006310(DNA recombination);GO:0071481(cellular response to X-ray);GO:0000723(telomere maintenance);GO:0006303(double-strand break repair via nonhomologous end joining);GO:0032508(DNA duplex unwinding)	GO:0043564(Ku70:Ku80 complex);GO:0000784(nuclear chromosome, telomeric region);GO:0005634(nucleus)	GO:0004003(ATP-dependent DNA helicase activity);GO:0003677(DNA binding);GO:0003690(double-stranded DNA binding);GO:0042162(telomeric DNA binding);GO:0003684(damaged DNA binding);GO:0004386(helicase activity)	K10884|XRCC6, KU70, G22P1|http://www.genome.jp/dbget-bin/www_bget?ko:K10884	ko03450(Non-homologous end-joining)	KOG2327(L)(DNA-binding subunit of a DNA-dependent protein kinase (Ku70 autoantigen))	sp|Q7F1M0|KU70_ORYSJ;sp|Q9FQ08|KU70_ARATH	sp|Q7F1M0|KU70_ORYSJ ATP-dependent DNA helicase 2 subunit KU70 OS=Oryza sativa subsp. japonica GN=KU70 PE=1 SV=1;sp|Q9FQ08|KU70_ARATH ATP-dependent DNA helicase 2 subunit KU70 OS=Arabidopsis thaliana GN=KU70 PE=1 SV=1
response to stress	Lus10005821.g	2.52	1.37	3.2	2.82	4.05	5.16	4.95	8.95	7.31	6.24	9.01	7.58	4.57	6.17	6.52	7.96	OAY27406.1	hypothetical protein MANES_16G123500 [Manihot esculenta]	GO:0016567(protein ubiquitination);GO:0006281(DNA repair);GO:0009058(biosynthetic process);GO:0008152(metabolic process)	GO:0000151(ubiquitin ligase complex)	GO:0004842(ubiquitin-protein transferase activity);GO:0043130(ubiquitin binding);GO:0003824(catalytic activity);GO:0030170(pyridoxal phosphate binding);GO:0016597(amino acid binding)	*	*	*	*	*
response to stress	Lus10005854.g	16.17	12.66	16.12	14.95	20.91	20.91	44.5	17.57	19.68	23.84	27.82	24.49	25.57	23.31	69.3	50.85	XP_011043382.1	PREDICTED: probable ubiquitin-conjugating enzyme E2 24 [Populus euphratica]	GO:0055062(phosphate ion homeostasis);GO:0006817(phosphate ion transport);GO:2000185(regulation of phosphate transmembrane transport);GO:0016036(cellular response to phosphate starvation);GO:0044257(cellular protein catabolic process)	GO:0005737(cytoplasm);GO:0005783(endoplasmic reticulum);GO:0005794(Golgi apparatus)	GO:0031625(ubiquitin protein ligase binding);GO:0061630(ubiquitin protein ligase activity)	K10581|UBE2O|http://www.genome.jp/dbget-bin/www_bget?ko:K10581	ko04120(Ubiquitin mediated proteolysis)	KOG0417(O)(Ubiquitin-protein ligase);KOG0895(O)(Ubiquitin-conjugating enzyme)	sp|Q8VY10|UBC24_ARATH	sp|Q8VY10|UBC24_ARATH Probable ubiquitin-conjugating enzyme E2 24 OS=Arabidopsis thaliana GN=UBC24 PE=1 SV=1
response to stress	Lus10005934.g	3.35	2.49	3.25	2.95	12.54	12.77	11.72	13.34	7.46	8.36	8.81	8.7	16.72	14.67	10.67	12.34	XP_012082662.1	PREDICTED: sodium/hydrogen exchanger 2-like [Jatropha curcas]	GO:0055075(potassium ion homeostasis);GO:0006814(sodium ion transport);GO:0006810(transport);GO:0006885(regulation of pH);GO:0055085(transmembrane transport);GO:0006811(ion transport);GO:0009651(response to salt stress);GO:0006812(cation transport)	GO:0005886(plasma membrane);GO:0016021(integral component of membrane);GO:0016020(membrane);GO:0005774(vacuolar membrane)	GO:0015299(solute:proton antiporter activity);GO:0015385(sodium:proton antiporter activity);GO:0015297(antiporter activity)	*	*	KOG1965(P)(Sodium/hydrogen exchanger protein)	sp|Q56XP4|NHX2_ARATH	sp|Q56XP4|NHX2_ARATH Sodium/hydrogen exchanger 2 OS=Arabidopsis thaliana GN=NHX2 PE=2 SV=2
response to stress	Lus10006311.g	16.6	14.26	10.09	9.18	48.23	36.32	55.84	51.8	17.65	27.97	28.26	31.71	38.58	31.34	32.06	33.97	OAY54614.1	hypothetical protein MANES_03G089000 [Manihot esculenta]	GO:0006979(response to oxidative stress)	GO:0016020(membrane);GO:0016021(integral component of membrane)	*	*	*	*	*	*
response to stress	Lus10006374.g	8.11	10.5	6.12	5.59	8.46	6.68	17.25	13.9	18.11	20.76	21.59	27.26	6.8	2.63	7.36	9.93	OAY34976.1	hypothetical protein MANES_12G061400 [Manihot esculenta]	GO:0006950(response to stress);GO:0006457(protein folding)	GO:0005618(cell wall);GO:0005739(mitochondrion);GO:0009570(chloroplast stroma)	GO:0051082(unfolded protein binding);GO:0005524(ATP binding)	K09487|HSP90B, TRA1|http://www.genome.jp/dbget-bin/www_bget?ko:K09487	ko04141(Protein processing in endoplasmic reticulum);ko04626(Plant-pathogen interaction)	KOG0020(O)(Endoplasmic reticulum glucose-regulated protein (GRP94/endoplasmin), HSP90 family)	sp|F4JFN3|HS906_ARATH	sp|F4JFN3|HS906_ARATH Heat shock protein 90-6, mitochondrial OS=Arabidopsis thaliana GN=HSP90-6 PE=2 SV=1
response to stress	Lus10006452.g	2.54	2.87	2.24	2.99	5.55	6.04	8.63	8.55	5.51	6.86	5.95	5.28	6.96	8.32	8.95	5.94	XP_015572282.1	PREDICTED: regulator of G-protein signaling 1 isoform X2 [Ricinus communis]	GO:0007186(G-protein coupled receptor signaling pathway);GO:0009737(response to abscisic acid);GO:0010182(sugar mediated signaling pathway);GO:0009749(response to glucose);GO:0042127(regulation of cell proliferation);GO:0043547(positive regulation of GTPase activity);GO:0009414(response to water deprivation)	GO:0005737(cytoplasm);GO:0010008(endosome membrane);GO:0005886(plasma membrane);GO:0016020(membrane);GO:0016021(integral component of membrane);GO:0005634(nucleus)	GO:0005096(GTPase activator activity);GO:0004930(G-protein coupled receptor activity)	*	*	*	sp|Q8H1F2|RGS1_ARATH	sp|Q8H1F2|RGS1_ARATH Regulator of G-protein signaling 1 OS=Arabidopsis thaliana GN=RGS1 PE=1 SV=1
response to stress	Lus10006552.g	4.92	11.83	61.21	20.11	90.52	19.33	105.22	31.11	14.93	48.83	20.38	3.31	231.41	80.56	204.05	150.76	XP_002319077.1	class 4 pathogenesis-related family protein [Populus trichocarpa]	GO:0042742(defense response to bacterium);GO:0050832(defense response to fungus)	*	GO:0008061(chitin binding)	*	*	*	sp|P09761|WIN1_SOLTU;sp|P09762|WIN2_SOLTU	sp|P09761|WIN1_SOLTU Wound-induced protein WIN1 OS=Solanum tuberosum GN=WIN1 PE=2 SV=1;sp|P09762|WIN2_SOLTU Wound-induced protein WIN2 OS=Solanum tuberosum GN=WIN2 PE=2 SV=1
response to stress	Lus10006746.g	4.07	4.12	2.79	2.35	5.17	7.38	14.17	14.66	12.57	12.65	7.99	7.66	3.42	3.56	10.87	15.23	XP_012091447.1	PREDICTED: G-type lectin S-receptor-like serine/threonine-protein kinase At1g11410 [Jatropha curcas]	GO:0016310(phosphorylation);GO:0006468(protein phosphorylation);GO:0048544(recognition of pollen);GO:0006952(defense response)	GO:0016020(membrane);GO:0016021(integral component of membrane);GO:0005886(plasma membrane);GO:0009506(plasmodesma)	GO:0004672(protein kinase activity);GO:0004674(protein serine/threonine kinase activity);GO:0016301(kinase activity);GO:0016740(transferase activity);GO:0005524(ATP binding);GO:0000166(nucleotide binding)	*	*	*	sp|Q9ZT07|RKS1_ARATH	sp|Q9ZT07|RKS1_ARATH G-type lectin S-receptor-like serine/threonine-protein kinase RKS1 OS=Arabidopsis thaliana GN=RKS1 PE=3 SV=3
response to stress	Lus10006778.g	200.11	218.61	191.51	219.63	349.06	523.61	1095.12	1223.66	944.87	918.52	782.22	830.17	253.48	401.62	610.49	651.79	XP_010052841.1	PREDICTED: peroxidase 42 [Eucalyptus grandis]	GO:0042744(hydrogen peroxide catabolic process);GO:0055114(oxidation-reduction process);GO:0006979(response to oxidative stress);GO:0009664(plant-type cell wall organization);GO:0050832(defense response to fungus)	GO:0005576(extracellular region);GO:0009505(plant-type cell wall);GO:0005829(cytosol)	GO:0020037(heme binding);GO:0046872(metal ion binding);GO:0016491(oxidoreductase activity);GO:0004601(peroxidase activity)	K00430|E1.11.1.7|http://www.genome.jp/dbget-bin/www_bget?ko:K00430	ko00940(Phenylpropanoid biosynthesis)	*	sp|Q9SB81|PER42_ARATH	sp|Q9SB81|PER42_ARATH Peroxidase 42 OS=Arabidopsis thaliana GN=PER42 PE=1 SV=2
response to stress	Lus10006793.g	0.61	0.21	0.39	0.13	0.89	0.88	3.95	4.53	1.12	1.11	0.56	1.09	1.72	0.79	4.67	2.75	XP_012065611.1	PREDICTED: putative disease resistance protein RGA3 [Jatropha curcas]	GO:0006952(defense response)	*	GO:0043531(ADP binding)	K15078|SLX1|http://www.genome.jp/dbget-bin/www_bget?ko:K15078	*	KOG0619(R)(FOG: Leucine rich repeat)	sp|Q9LRR4|R13L1_ARATH	sp|Q9LRR4|R13L1_ARATH Putative disease resistance RPP13-like protein 1 OS=Arabidopsis thaliana GN=RPPL1 PE=3 SV=1
response to stress	Lus10006794.g	0.26	0.15	0.31	0	0.69	0.31	2.19	1.43	0.17	0.24	0.05	0.21	0.75	0.49	1.22	0.65	OAY33888.1	hypothetical protein MANES_13G133500 [Manihot esculenta]	GO:0006952(defense response)	*	GO:0043531(ADP binding)	*	*	*	sp|Q7XA39|RGA4_SOLBU	sp|Q7XA39|RGA4_SOLBU Putative disease resistance protein RGA4 OS=Solanum bulbocastanum GN=RGA4 PE=2 SV=1
response to stress	Lus10006818.g	0.99	1.19	1.03	1.59	3.56	5.05	7.45	9	8.04	4.41	3.53	4.73	4.79	4.8	11.55	9.99	BAF03493.1	Ku70 homolog [Populus nigra]	GO:0071480(cellular response to gamma radiation);GO:0006310(DNA recombination);GO:0071481(cellular response to X-ray);GO:0000723(telomere maintenance);GO:0006303(double-strand break repair via nonhomologous end joining);GO:0032508(DNA duplex unwinding)	GO:0043564(Ku70:Ku80 complex);GO:0000784(nuclear chromosome, telomeric region);GO:0005634(nucleus)	GO:0004003(ATP-dependent DNA helicase activity);GO:0003677(DNA binding);GO:0003690(double-stranded DNA binding);GO:0042162(telomeric DNA binding);GO:0003684(damaged DNA binding);GO:0004386(helicase activity)	K10884|XRCC6, KU70, G22P1|http://www.genome.jp/dbget-bin/www_bget?ko:K10884	ko03450(Non-homologous end-joining)	KOG2327(L)(DNA-binding subunit of a DNA-dependent protein kinase (Ku70 autoantigen))	sp|Q7F1M0|KU70_ORYSJ	sp|Q7F1M0|KU70_ORYSJ ATP-dependent DNA helicase 2 subunit KU70 OS=Oryza sativa subsp. japonica GN=KU70 PE=1 SV=1
response to stress	Lus10006836.g	0.82	0.8	1.33	0.72	1.91	2.03	3.04	2.9	2.93	2.62	1.73	2.23	2.83	2.93	2.97	2.44	XP_008245911.1	PREDICTED: DNA polymerase zeta processivity subunit-like isoform X1 [Prunus mume]	GO:0006974(cellular response to DNA damage stimulus);GO:0010224(response to UV-B)	GO:0016021(integral component of membrane);GO:0016020(membrane)	GO:0003677(DNA binding)	K13728|MAD2L2|http://www.genome.jp/dbget-bin/www_bget?ko:K13728	*	KOG3285(DZ)(Spindle assembly checkpoint protein);KOG3186(D)(Mitotic spindle checkpoint protein)	sp|Q94FL5|REV7_ARATH	sp|Q94FL5|REV7_ARATH DNA polymerase zeta processivity subunit OS=Arabidopsis thaliana GN=REV7 PE=2 SV=1
response to stress	Lus10006998.g	4.5	7.27	6.69	6.97	9.75	7.15	21.3	21.53	22.2	21.84	16	18.17	11.63	5.6	16.11	16.59	XP_017972195.1	PREDICTED: RNA polymerase II transcription factor B subunit 5 [Theobroma cacao]	GO:0006289(nucleotide-excision repair);GO:0006355(regulation of transcription, DNA-templated)	GO:0000439(core TFIIH complex)	*	K10845|TTDA, GTF2H5, TFB5|http://www.genome.jp/dbget-bin/www_bget?ko:K10845	ko03420(Nucleotide excision repair);ko03022(Basal transcription factors)	*	sp|Q6NNM0|TFB5_ARATH	sp|Q6NNM0|TFB5_ARATH RNA polymerase II transcription factor B subunit 5 OS=Arabidopsis thaliana GN=TFB5 PE=3 SV=1
response to stress	Lus10007041.g	4.17	3.98	5.08	3.13	3.83	3.33	8.21	10.87	20.87	16.02	9.32	12.91	5.2	4.38	7.39	9.2	NP_177763.1	Protein kinase superfamily protein [Arabidopsis thaliana]	GO:0006468(protein phosphorylation);GO:0006952(defense response)	GO:0009941(chloroplast envelope);GO:0005886(plasma membrane)	GO:0004672(protein kinase activity);GO:0004674(protein serine/threonine kinase activity);GO:0005524(ATP binding);GO:0000166(nucleotide binding);GO:0016301(kinase activity)	*	*	*	sp|Q9SFX0|PBL22_ARATH	sp|Q9SFX0|PBL22_ARATH Probable serine/threonine-protein kinase PBL22 OS=Arabidopsis thaliana GN=PBL22 PE=2 SV=1
response to stress	Lus10007095.g	0.3	0.25	0.23	0.54	0.47	0.55	0.9	1.64	1.45	0.99	1.41	1.49	0.5	0.55	1.33	0.98	XP_012074567.1	PREDICTED: fatty acid amide hydrolase [Jatropha curcas]	GO:0070291(N-acylethanolamine metabolic process);GO:0042742(defense response to bacterium)	GO:0005886(plasma membrane);GO:0005783(endoplasmic reticulum);GO:0005773(vacuole);GO:0005774(vacuolar membrane);GO:0005794(Golgi apparatus)	GO:0016884(carbon-nitrogen ligase activity, with glutamine as amido-N-donor);GO:0016740(transferase activity);GO:0004040(amidase activity);GO:0016787(hydrolase activity);GO:0047412(N-(long-chain-acyl)ethanolamine deacylase activity)	*	*	KOG1211(J)(Amidases)	sp|Q7XJJ7|FAAH_ARATH	sp|Q7XJJ7|FAAH_ARATH Fatty acid amide hydrolase OS=Arabidopsis thaliana GN=FAAH PE=1 SV=1
response to stress	Lus10007359.g	1.72	1.59	1.48	1.43	1.58	2.42	5.04	3.05	2.44	2.24	3.85	3.71	2.02	2	6.9	5.84	OAY35351.1	hypothetical protein MANES_12G094100 [Manihot esculenta]	GO:0006952(defense response)	*	GO:0043531(ADP binding)	*	*	*	sp|Q9FKZ0|DRL43_ARATH;sp|Q9FKZ1|DRL42_ARATH	sp|Q9FKZ0|DRL43_ARATH Probable disease resistance protein At5g66910 OS=Arabidopsis thaliana GN=At5g66910 PE=2 SV=1;sp|Q9FKZ1|DRL42_ARATH Probable disease resistance protein At5g66900 OS=Arabidopsis thaliana GN=At5g66900 PE=3 SV=1
response to stress	Lus10007365.g	2.37	2.53	1.64	2.07	1.52	1.96	4.47	3.94	5.48	5.58	5.75	5.74	1.99	2.15	4.62	4.13	XP_012084677.1	PREDICTED: nijmegen breakage syndrome 1 protein [Jatropha curcas]	GO:0006974(cellular response to DNA damage stimulus);GO:0007131(reciprocal meiotic recombination);GO:0007129(synapsis);GO:0006312(mitotic recombination);GO:0000724(double-strand break repair via homologous recombination);GO:0016233(telomere capping);GO:0007095(mitotic G2 DNA damage checkpoint);GO:0042770(signal transduction in response to DNA damage);GO:0032508(DNA duplex unwinding)	GO:0030870(Mre11 complex);GO:0000784(nuclear chromosome, telomeric region)	GO:0004003(ATP-dependent DNA helicase activity);GO:0003684(damaged DNA binding)	K10867|NBN, NBS1|http://www.genome.jp/dbget-bin/www_bget?ko:K10867	ko03440(Homologous recombination)	*	sp|Q0H8D7|NBS1_ARATH	sp|Q0H8D7|NBS1_ARATH Nijmegen breakage syndrome 1 protein OS=Arabidopsis thaliana GN=NBS1 PE=1 SV=1
response to stress	Lus10007455.g	0.28	0.65	3.81	2.17	5.81	1.13	4.95	0.98	1.68	3.07	1.59	0.53	7.88	3.52	3.56	3.7	KDO50426.1	hypothetical protein CISIN_1g043408mg, partial [Citrus sinensis]	GO:0007165(signal transduction);GO:0006952(defense response);GO:0030001(metal ion transport);GO:0046916(cellular transition metal ion homeostasis)	GO:0005737(cytoplasm)	GO:0043531(ADP binding);GO:0046872(metal ion binding);GO:0046914(transition metal ion binding)	*	*	*	sp|F4J339|RPP1_ARATH;sp|O03982|HIP39_ARATH	sp|F4J339|RPP1_ARATH Probable disease resistance protein RPP1 OS=Arabidopsis thaliana GN=RPP1 PE=2 SV=1;sp|O03982|HIP39_ARATH Heavy metal-associated isoprenylated plant protein 39 OS=Arabidopsis thaliana GN=HIPP39 PE=2 SV=1
response to stress	Lus10007489.g	0.28	0.37	0.83	0.18	0.68	0.73	1.08	1.36	1.17	1.61	1.94	0.84	0.64	0.67	1.75	1.19	XP_017634256.1	PREDICTED: DNA mismatch repair protein MSH4 [Gossypium arboreum]	GO:0006298(mismatch repair)	*	GO:0005524(ATP binding);GO:0030983(mismatched DNA binding)	K08740|MSH4|http://www.genome.jp/dbget-bin/www_bget?ko:K08740	*	KOG0217(L)(Mismatch repair ATPase MSH6 (MutS family))	sp|F4JP48|MSH4_ARATH	sp|F4JP48|MSH4_ARATH DNA mismatch repair protein MSH4 OS=Arabidopsis thaliana GN=MSH4 PE=2 SV=1
response to stress	Lus10007600.g	1.41	1.37	4.32	1.8	20.9	9.62	7.43	5.73	3.11	4.2	3.49	3.11	21.8	13.08	5.25	4.25	GAV67414.1	Pkinase domain-containing protein/S_locus_glycop domain-containing protein/B_lectin domain-containing protein/Pkinase_Tyr domain-containing protein/PAN_2 domain-containing protein/DUF3403 domain-containing protein [Cephalotus follicularis]	GO:0016310(phosphorylation);GO:0048544(recognition of pollen);GO:0006952(defense response);GO:0006468(protein phosphorylation)	GO:0005886(plasma membrane);GO:0016021(integral component of membrane);GO:0016020(membrane);GO:0009506(plasmodesma)	GO:0004672(protein kinase activity);GO:0005524(ATP binding);GO:0004674(protein serine/threonine kinase activity);GO:0016301(kinase activity);GO:0016740(transferase activity);GO:0030246(carbohydrate binding);GO:0000166(nucleotide binding)	*	*	*	sp|O81906|B120_ARATH;sp|O64778|Y1142_ARATH	sp|O81906|B120_ARATH G-type lectin S-receptor-like serine/threonine-protein kinase B120 OS=Arabidopsis thaliana GN=B120 PE=2 SV=1;sp|O64778|Y1142_ARATH G-type lectin S-receptor-like serine/threonine-protein kinase At1g61420 OS=Arabidopsis thaliana GN=At1g61420 PE=3 SV=2
response to stress	Lus10007602.g	0.28	0.48	1.13	0.67	2.17	1.48	2.02	2.14	1.25	1.77	0.86	1.05	3.38	3.02	2.08	1.71	XP_002886974.1	hypothetical protein ARALYDRAFT_475686 [Arabidopsis lyrata subsp. lyrata]	GO:0006468(protein phosphorylation);GO:0048544(recognition of pollen);GO:0006952(defense response);GO:0016310(phosphorylation)	GO:0016020(membrane);GO:0016021(integral component of membrane);GO:0005886(plasma membrane);GO:0009506(plasmodesma)	GO:0004672(protein kinase activity);GO:0004674(protein serine/threonine kinase activity);GO:0005524(ATP binding);GO:0016301(kinase activity);GO:0016740(transferase activity);GO:0000166(nucleotide binding);GO:0031625(ubiquitin protein ligase binding)	*	*	*	sp|O81905|SD18_ARATH	sp|O81905|SD18_ARATH Receptor-like serine/threonine-protein kinase SD1-8 OS=Arabidopsis thaliana GN=SD18 PE=1 SV=1
response to stress	Lus10007604.g	0.52	0.55	0.91	0.69	1.81	1.54	2.26	2.23	2.96	2.48	1.96	1.23	1.66	1.12	2.05	2.33	OAY24641.1	hypothetical protein MANES_17G031800 [Manihot esculenta]	GO:0016310(phosphorylation);GO:0006468(protein phosphorylation);GO:0048544(recognition of pollen);GO:0045087(innate immune response)	GO:0016020(membrane);GO:0016021(integral component of membrane);GO:0005886(plasma membrane);GO:0009506(plasmodesma)	GO:0004672(protein kinase activity);GO:0004674(protein serine/threonine kinase activity);GO:0016301(kinase activity);GO:0016740(transferase activity);GO:0005524(ATP binding);GO:0000166(nucleotide binding);GO:0031625(ubiquitin protein ligase binding)	*	*	*	sp|Q9ZT07|RKS1_ARATH	sp|Q9ZT07|RKS1_ARATH G-type lectin S-receptor-like serine/threonine-protein kinase RKS1 OS=Arabidopsis thaliana GN=RKS1 PE=3 SV=3
response to stress	Lus10007632.g	4.97	4.41	20.11	7.25	17.22	11.11	21.21	18.54	8.3	9.16	9.19	6.53	37.32	18.11	29.94	29.81	KDP20815.1	hypothetical protein JCGZ_21286 [Jatropha curcas]	GO:0006468(protein phosphorylation);GO:0042742(defense response to bacterium)	GO:0005886(plasma membrane);GO:0016020(membrane);GO:0016021(integral component of membrane);GO:0009506(plasmodesma)	GO:0004672(protein kinase activity);GO:0004674(protein serine/threonine kinase activity);GO:0005524(ATP binding);GO:0016740(transferase activity);GO:0004715(non-membrane spanning protein tyrosine kinase activity)	*	*	*	sp|Q8GYA4|CRK10_ARATH;sp|Q9C5S8|CRK5_ARATH	sp|Q8GYA4|CRK10_ARATH Cysteine-rich receptor-like protein kinase 10 OS=Arabidopsis thaliana GN=CRK10 PE=1 SV=3;sp|Q9C5S8|CRK5_ARATH Cysteine-rich receptor-like protein kinase 5 OS=Arabidopsis thaliana GN=CRK5 PE=1 SV=1
response to stress	Lus10007633.g	1.17	1.8	4.56	2.69	5.78	4.15	24.53	16.09	2.71	2.46	3.47	1.87	14.05	3.07	35.77	28.27	KDO75602.1	hypothetical protein CISIN_1g006155mg [Citrus sinensis]	GO:0006468(protein phosphorylation);GO:0042742(defense response to bacterium)	GO:0005886(plasma membrane);GO:0016020(membrane);GO:0016021(integral component of membrane);GO:0009506(plasmodesma)	GO:0004672(protein kinase activity);GO:0004674(protein serine/threonine kinase activity);GO:0005524(ATP binding)	*	*	*	sp|Q8GYA4|CRK10_ARATH	sp|Q8GYA4|CRK10_ARATH Cysteine-rich receptor-like protein kinase 10 OS=Arabidopsis thaliana GN=CRK10 PE=1 SV=3
response to stress	Lus10007634.g	1.7	2.34	5.59	2.79	3.18	2.01	7.27	4.06	2.18	1.64	2.24	1.37	11.16	6.73	16.29	14.34	KDO75602.1	hypothetical protein CISIN_1g006155mg [Citrus sinensis]	GO:0016310(phosphorylation);GO:0006468(protein phosphorylation);GO:0042742(defense response to bacterium)	GO:0016020(membrane);GO:0016021(integral component of membrane);GO:0005886(plasma membrane);GO:0009506(plasmodesma)	GO:0004672(protein kinase activity);GO:0004674(protein serine/threonine kinase activity);GO:0016301(kinase activity);GO:0005524(ATP binding)	*	*	*	sp|Q8GYA4|CRK10_ARATH	sp|Q8GYA4|CRK10_ARATH Cysteine-rich receptor-like protein kinase 10 OS=Arabidopsis thaliana GN=CRK10 PE=1 SV=3
response to stress	Lus10007866.g	2.22	2.74	2.76	2.23	5.56	6.14	7.13	7.05	8.23	7.15	7.06	6.36	6.54	4.7	7.63	7.33	XP_002321013.1	DNA mismatch repair family protein [Populus trichocarpa]	GO:0006310(DNA recombination);GO:0010154(fruit development);GO:0048316(seed development);GO:0009555(pollen development);GO:0006298(mismatch repair)	GO:0032389(MutLalpha complex);GO:0032300(mismatch repair complex)	GO:0030983(mismatched DNA binding);GO:0003697(single-stranded DNA binding);GO:0005524(ATP binding);GO:0016887(ATPase activity)	K10858|PMS2|http://www.genome.jp/dbget-bin/www_bget?ko:K10858	ko03430(Mismatch repair)	KOG1978(L)(DNA mismatch repair protein - MLH2/PMS1/Pms2 family)	sp|Q941I6|PMS1_ARATH	sp|Q941I6|PMS1_ARATH DNA mismatch repair protein PMS1 OS=Arabidopsis thaliana GN=PMS1 PE=1 SV=1
response to stress	Lus10007905.g	10.76	12.4	19.76	22.84	4.27	6.2	68.45	36.84	23.88	26.75	43.78	54.66	75.5	43.78	247.08	77.22	XP_014625734.1	PREDICTED: desiccation protectant protein Lea14 homolog isoform X1 [Glycine max]	GO:0009269(response to desiccation)	*	*	*	*	*	sp|P46519|LEA14_SOYBN	sp|P46519|LEA14_SOYBN Desiccation protectant protein Lea14 homolog OS=Glycine max PE=2 SV=1
response to stress	Lus10008129.g	5.81	1.66	5.11	2.08	12.77	5.57	92.7	12.99	2.9	16.83	2.37	1.42	16.84	7.82	14.48	13.33	XP_004243696.1	PREDICTED: protein TIFY 10b-like [Solanum lycopersicum]	GO:0031347(regulation of defense response);GO:2000022(regulation of jasmonic acid mediated signaling pathway);GO:0009611(response to wounding);GO:1903507(negative regulation of nucleic acid-templated transcription)	GO:0005634(nucleus)	GO:0003714(transcription corepressor activity)	K13464|JAZ|http://www.genome.jp/dbget-bin/www_bget?ko:K13464	ko04075(Plant hormone signal transduction)	*	sp|A2YNP2|TI10B_ORYSI;sp|Q84R94|TI10A_ORYSJ;sp|Q9LMA8|TI10A_ARATH	sp|A2YNP2|TI10B_ORYSI Protein TIFY 10b OS=Oryza sativa subsp. indica GN=TIFY10B PE=3 SV=1;sp|Q84R94|TI10A_ORYSJ Protein TIFY 10a OS=Oryza sativa subsp. japonica GN=TIFY10A PE=1 SV=1;sp|Q9LMA8|TI10A_ARATH Protein TIFY 10A OS=Arabidopsis thaliana GN=TIFY10A PE=1 SV=1
response to stress	Lus10008227.g	181.76	161.16	247.2	268.2	333.22	264.62	898.11	872.47	767.23	914.16	865.66	847.94	307.95	277.28	771.26	713.84	EOY16019.1	Annexin 1 [Theobroma cacao]	GO:0070588(calcium ion transmembrane transport);GO:0006970(response to osmotic stress);GO:0055114(oxidation-reduction process);GO:0009737(response to abscisic acid);GO:0071435(potassium ion export);GO:0009409(response to cold);GO:0009408(response to heat);GO:0046686(response to cadmium ion);GO:0009414(response to water deprivation);GO:0009651(response to salt stress);GO:0006979(response to oxidat…	GO:0005739(mitochondrion);GO:0005886(plasma membrane);GO:0005829(cytosol);GO:0009579(thylakoid);GO:0016020(membrane);GO:0009507(chloroplast);GO:0005773(vacuole);GO:0005618(cell wall);GO:0009570(chloroplast stroma);GO:0009506(plasmodesma);GO:0005737(cytoplasm);GO:0048046(apoplast);GO:0005634(nucleus);GO:0005774(vacuolar membrane)	GO:0005509(calcium ion binding);GO:0005544(calcium-dependent phospholipid binding);GO:0005524(ATP binding);GO:0005507(copper ion binding);GO:0042803(protein homodimerization activity);GO:0004601(peroxidase activity);GO:0008270(zinc ion binding)	K17095|ANXA7_11|http://www.genome.jp/dbget-bin/www_bget?ko:K17095	*	KOG0819(U)(Annexin)	sp|Q9SYT0|ANXD1_ARATH	sp|Q9SYT0|ANXD1_ARATH Annexin D1 OS=Arabidopsis thaliana GN=ANN1 PE=1 SV=1
response to stress	Lus10008340.g	8.1	11.09	11.99	11.02	36.8	57.86	59.93	80.5	26.47	22.71	21.03	18.16	44.27	33.08	40.52	36.85	EEF29044.1	Protein MLO, putative, partial [Ricinus communis]	GO:0009607(response to biotic stimulus);GO:0006952(defense response)	GO:0016020(membrane);GO:0016021(integral component of membrane);GO:0005886(plasma membrane)	GO:0005516(calmodulin binding)	K08472|MLO|http://www.genome.jp/dbget-bin/www_bget?ko:K08472	*	*	sp|O49621|MLO1_ARATH	sp|O49621|MLO1_ARATH MLO-like protein 1 OS=Arabidopsis thaliana GN=MLO1 PE=1 SV=1
response to stress	Lus10008499.g	136.24	136.36	172.9	165.83	484.16	491.79	752.35	569.79	115.19	127.67	160.74	132.81	609.74	332.72	598.58	476.13	GAV57939.1	GSHPx domain-containing protein [Cephalotus follicularis]	GO:0055114(oxidation-reduction process);GO:0006979(response to oxidative stress)	*	GO:0004602(glutathione peroxidase activity);GO:0016491(oxidoreductase activity);GO:0004601(peroxidase activity)	K00432|gpx|http://www.genome.jp/dbget-bin/www_bget?ko:K00432	ko00590(Arachidonic acid metabolism);ko00480(Glutathione metabolism)	KOG1651(O)(Glutathione peroxidase)	sp|P30708|GPX4_NICSY;sp|O23814|GPX4_SPIOL	sp|P30708|GPX4_NICSY Probable phospholipid hydroperoxide glutathione peroxidase OS=Nicotiana sylvestris PE=2 SV=1;sp|O23814|GPX4_SPIOL Probable phospholipid hydroperoxide glutathione peroxidase OS=Spinacia oleracea PE=2 SV=1
response to stress	Lus10008537.g	161.05	156.2	279.67	230.47	2425.78	2058.69	612.7	543.42	154.21	218.93	226.5	181.57	2447.75	1735.42	511.2	552.26	OAY56511.1	hypothetical protein MANES_02G022600 [Manihot esculenta]	GO:0006979(response to oxidative stress);GO:0055114(oxidation-reduction process)	*	GO:0004602(glutathione peroxidase activity);GO:0016491(oxidoreductase activity);GO:0004601(peroxidase activity)	K00432|gpx|http://www.genome.jp/dbget-bin/www_bget?ko:K00432	ko00590(Arachidonic acid metabolism);ko00480(Glutathione metabolism)	KOG1651(O)(Glutathione peroxidase)	sp|P30708|GPX4_NICSY;sp|O23814|GPX4_SPIOL	sp|P30708|GPX4_NICSY Probable phospholipid hydroperoxide glutathione peroxidase OS=Nicotiana sylvestris PE=2 SV=1;sp|O23814|GPX4_SPIOL Probable phospholipid hydroperoxide glutathione peroxidase OS=Spinacia oleracea PE=2 SV=1
response to stress	Lus10008652.g	68.93	68.21	81.84	69.44	222.84	208.55	457.17	472.56	333.22	308.25	297.03	302.93	211.46	182.8	449.06	478.8	XP_007010484.1	PREDICTED: dnaJ protein homolog [Theobroma cacao]	GO:0009408(response to heat);GO:0006457(protein folding)	*	GO:0051082(unfolded protein binding);GO:0046872(metal ion binding);GO:0005524(ATP binding);GO:0031072(heat shock protein binding)	K09503|DNAJA2|http://www.genome.jp/dbget-bin/www_bget?ko:K09503	ko04141(Protein processing in endoplasmic reticulum)	KOG0712(O)(Molecular chaperone (DnaJ superfamily))	sp|Q04960|DNJH_CUCSA;sp|P42824|DNJH2_ALLPO	sp|Q04960|DNJH_CUCSA DnaJ protein homolog OS=Cucumis sativus GN=DNAJ1 PE=2 SV=1;sp|P42824|DNJH2_ALLPO DnaJ protein homolog 2 OS=Allium porrum GN=LDJ2 PE=2 SV=1
response to stress	Lus10008764.g	0.51	0.31	0.27	0.42	0.69	1.2	1.55	1.16	3.7	3.38	1.26	0.66	0.77	0.98	1.25	1.5	XP_012081199.1	PREDICTED: cysteine-rich receptor-like protein kinase 42 [Jatropha curcas]	GO:0006468(protein phosphorylation);GO:0006952(defense response)	GO:0016020(membrane);GO:0016021(integral component of membrane);GO:0005886(plasma membrane);GO:0009506(plasmodesma)	GO:0004672(protein kinase activity);GO:0005524(ATP binding);GO:0004674(protein serine/threonine kinase activity)	*	*	*	sp|Q9FNE1|CRK42_ARATH	sp|Q9FNE1|CRK42_ARATH Cysteine-rich receptor-like protein kinase 42 OS=Arabidopsis thaliana GN=CRK42 PE=2 SV=1
response to stress	Lus10008964.g	0.5	0.46	0.35	0.35	2.07	1.38	3.57	2.93	1.74	2.8	3.48	2.14	2	0.36	2.22	2.38	XP_012068051.1	PREDICTED: crt homolog 1 isoform X2 [Jatropha curcas]	GO:0034635(glutathione transport);GO:0002229(defense response to oomycetes);GO:0046686(response to cadmium ion)	GO:0016020(membrane);GO:0016021(integral component of membrane);GO:0009507(chloroplast);GO:0009536(plastid)	*	*	*	*	sp|A1L4X0|CLT2_ARATH	sp|A1L4X0|CLT2_ARATH Protein CLT2, chloroplastic OS=Arabidopsis thaliana GN=CLT2 PE=2 SV=1
response to stress	Lus10009011.g	3.08	3.24	3.56	3.98	6.23	6.43	15.43	10.14	10.99	11.02	9.53	8.83	8.1	6.1	11.24	9.62	XP_015578273.1	PREDICTED: nuclear poly(A) polymerase 1 isoform X1 [Ricinus communis]	GO:0009908(flower development);GO:0048366(leaf development);GO:0043631(RNA polyadenylation);GO:0031123(RNA 3'-end processing);GO:0045824(negative regulation of innate immune response);GO:0008285(negative regulation of cell proliferation);GO:0006378(mRNA polyadenylation);GO:0048451(petal formation)	GO:0005634(nucleus)	GO:0004652(polynucleotide adenylyltransferase activity);GO:0003723(RNA binding);GO:0016779(nucleotidyltransferase activity)	K14376|PAP|http://www.genome.jp/dbget-bin/www_bget?ko:K14376	ko03015(mRNA surveillance pathway)	KOG2245(A)(Poly(A) polymerase and related nucleotidyltransferases)	sp|Q9LMT2|PAPS1_ARATH	sp|Q9LMT2|PAPS1_ARATH Nuclear poly(A) polymerase 1 OS=Arabidopsis thaliana GN=PAPS1 PE=1 SV=1
response to stress	Lus10009092.g	47.07	41.38	758.1	93.14	688.72	467.43	143.97	160.89	35.09	62.39	19.31	21.35	1034.82	597.9	137.21	389.54	OAY41596.1	hypothetical protein MANES_09G114400 [Manihot esculenta]	GO:0006952(defense response)	*	*	*	*	*	sp|Q9LZX1|LOR15_ARATH	sp|Q9LZX1|LOR15_ARATH Protein LURP-one-related 15 OS=Arabidopsis thaliana GN=At5g01750 PE=1 SV=1
response to stress	Lus10009107.g	0.47	0.46	0.62	0.46	0.82	0.82	1.79	1.41	1.87	1.69	1.01	0.99	0.92	1.04	1.32	1.78	OAY58695.1	hypothetical protein MANES_02G199900 [Manihot esculenta]	GO:0007165(signal transduction);GO:0006952(defense response)	*	GO:0043531(ADP binding)	*	*	*	sp|O23530|SNC1_ARATH;sp|Q9FI14|TAO1_ARATH;sp|Q40392|TMVRN_NICGU	sp|O23530|SNC1_ARATH Protein SUPPRESSOR OF npr1-1, CONSTITUTIVE 1 OS=Arabidopsis thaliana GN=SNC1 PE=1 SV=5;sp|Q9FI14|TAO1_ARATH Disease resistance protein TAO1 OS=Arabidopsis thaliana GN=TAO1 PE=4 SV=1;sp|Q40392|TMVRN_NICGU TMV resistance protein N OS=Nicotiana glutinosa GN=N PE=1 SV=1
response to stress	Lus10009272.g	9.16	8.58	13.38	9.67	25.71	23.3	27.53	29.82	21.27	17.27	15.43	14.83	29.87	26.22	28.31	29.38	OAY23201.1	hypothetical protein MANES_18G060000 [Manihot esculenta]	GO:0006950(response to stress)	*	*	*	*	*	sp|Q8L4N1|PHO34_ARATH;sp|Q8LGG8|USPAL_ARATH	sp|Q8L4N1|PHO34_ARATH Universal stress protein PHOS34 OS=Arabidopsis thaliana GN=PHOS34 PE=1 SV=1;sp|Q8LGG8|USPAL_ARATH Universal stress protein A-like protein OS=Arabidopsis thaliana GN=At3g01520 PE=1 SV=2
response to stress	Lus10009545.g	7.69	6.14	4.67	3.81	2.74	2.01	7.41	7.94	11.58	11.68	12.96	15.81	3.53	1.36	5.1	7.09	OAY35258.1	hypothetical protein MANES_12G085100 [Manihot esculenta]	GO:0006479(protein methylation);GO:0019918(peptidyl-arginine methylation, to symmetrical-dimethyl arginine);GO:0032259(methylation);GO:0035246(peptidyl-arginine N-methylation);GO:0006355(regulation of transcription, DNA-templated);GO:0009909(regulation of flower development);GO:0010220(positive regulation of vernalization response)	GO:0005829(cytosol);GO:0005634(nucleus)	GO:0016740(transferase activity);GO:0008168(methyltransferase activity);GO:0008469(histone-arginine N-methyltransferase activity);GO:0008276(protein methyltransferase activity)	K02516|PRMT5, HSL7|http://www.genome.jp/dbget-bin/www_bget?ko:K02516	ko03013(RNA transport)	KOG0822(D)(Protein kinase inhibitor)	sp|Q8GWT4|ANM15_ARATH	sp|Q8GWT4|ANM15_ARATH Protein arginine N-methyltransferase 1.5 OS=Arabidopsis thaliana GN=PMRT15 PE=1 SV=2
response to stress	Lus10009574.g	4.3	5.93	5.42	7.99	73.86	30.4	39.4	28.75	20.49	22.46	14.52	13.27	76.06	25.15	26.4	34.87	XP_012069464.1	PREDICTED: peptide methionine sulfoxide reductase B5-like [Jatropha curcas]	GO:0030091(protein repair);GO:0055114(oxidation-reduction process);GO:0006979(response to oxidative stress)	*	GO:0016671(oxidoreductase activity, acting on a sulfur group of donors, disulfide as acceptor);GO:0033743(peptide-methionine (R)-S-oxide reductase activity)	K07305|msrB|http://www.genome.jp/dbget-bin/www_bget?ko:K07305	*	KOG0856(O)(Predicted pilin-like transcription factor)	sp|Q6AUK5|MSRB3_ORYSJ;sp|Q10L32|MSRB5_ORYSJ	sp|Q6AUK5|MSRB3_ORYSJ Peptide methionine sulfoxide reductase B3, chloroplastic OS=Oryza sativa subsp. japonica GN=MSRB3 PE=2 SV=1;sp|Q10L32|MSRB5_ORYSJ Peptide methionine sulfoxide reductase B5 OS=Oryza sativa subsp. japonica GN=MSRB5 PE=2 SV=1
response to stress	Lus10009631.g	0.37	0.83	2.21	1.56	1.66	1.88	5.37	7.92	1.91	2.43	2.61	2.09	4.34	1.26	5.86	6.12	XP_011045846.1	PREDICTED: putative receptor-like protein kinase At4g00960 [Populus euphratica]	GO:0016310(phosphorylation);GO:0006468(protein phosphorylation);GO:0006952(defense response)	GO:0005886(plasma membrane);GO:0009506(plasmodesma)	GO:0004672(protein kinase activity);GO:0016301(kinase activity);GO:0016740(transferase activity);GO:0005524(ATP binding);GO:0004709(MAP kinase kinase kinase activity);GO:0004674(protein serine/threonine kinase activity)	K04733|IRAK4|http://www.genome.jp/dbget-bin/www_bget?ko:K04733	*	*	sp|O81906|B120_ARATH;sp|O81833|SD11_ARATH;sp|Q9SY89|Y1661_ARATH	sp|O81906|B120_ARATH G-type lectin S-receptor-like serine/threonine-protein kinase B120 OS=Arabidopsis thaliana GN=B120 PE=2 SV=1;sp|O81833|SD11_ARATH G-type lectin S-receptor-like serine/threonine-protein kinase SD1-1 OS=Arabidopsis thaliana GN=SD11 PE=1 SV=1;sp|Q9SY89|Y1661_ARATH Putative G-type lectin S-receptor-like serine/threonine-protein kinase At1g61610 OS=Arabidopsis thaliana GN=At1g6161…
response to stress	Lus10009641.g	1.52	1.9	1.77	1.41	1.25	2.08	3.36	4.54	4.56	3.47	3.72	3.84	1.92	1.92	4.61	5.39	XP_015578273.1	PREDICTED: nuclear poly(A) polymerase 1 isoform X1 [Ricinus communis]	GO:0009908(flower development);GO:0048366(leaf development);GO:0043631(RNA polyadenylation);GO:0031123(RNA 3'-end processing);GO:0045824(negative regulation of innate immune response);GO:0008285(negative regulation of cell proliferation);GO:0006378(mRNA polyadenylation);GO:0048451(petal formation)	GO:0005634(nucleus)	GO:0004652(polynucleotide adenylyltransferase activity);GO:0003723(RNA binding);GO:0016779(nucleotidyltransferase activity)	K14376|PAP|http://www.genome.jp/dbget-bin/www_bget?ko:K14376	ko03015(mRNA surveillance pathway)	KOG2245(A)(Poly(A) polymerase and related nucleotidyltransferases)	sp|Q9LMT2|PAPS1_ARATH	sp|Q9LMT2|PAPS1_ARATH Nuclear poly(A) polymerase 1 OS=Arabidopsis thaliana GN=PAPS1 PE=1 SV=1
response to stress	Lus10010013.g	321.52	323.46	403.35	363.77	79.33	143.79	148.2	92.16	748.02	870.46	1260.17	1118.8	103.89	144.31	84.88	255.86	XP_012082879.1	PREDICTED: universal stress protein A-like protein [Jatropha curcas]	GO:0006950(response to stress)	GO:0005773(vacuole)	*	*	*	*	sp|Q8VYN9|PHO32_ARATH	sp|Q8VYN9|PHO32_ARATH Universal stress protein PHOS32 OS=Arabidopsis thaliana GN=PHOS32 PE=1 SV=1
response to stress	Lus10010100.g	9.58	10.32	8.47	8.86	40.81	58.19	25.37	28.62	0.62	0.87	0.5	0.4	67.98	68.2	61.01	47.29	XP_012083087.1	PREDICTED: protein LHY [Jatropha curcas]	GO:0006351(transcription, DNA-templated);GO:0006355(regulation of transcription, DNA-templated);GO:0045893(positive regulation of transcription, DNA-templated);GO:0042754(negative regulation of circadian rhythm);GO:0045892(negative regulation of transcription, DNA-templated);GO:0043496(regulation of protein homodimerization activity);GO:0007623(circadian rhythm);GO:0009409(response to cold)	GO:0005634(nucleus)	GO:0003677(DNA binding);GO:0043565(sequence-specific DNA binding)	K12133|LHY|http://www.genome.jp/dbget-bin/www_bget?ko:K12133	ko04712(Circadian rhythm - plant)	*	sp|Q6R0H1|LHY_ARATH;sp|P92973|CCA1_ARATH	sp|Q6R0H1|LHY_ARATH Protein LHY OS=Arabidopsis thaliana GN=LHY PE=1 SV=2;sp|P92973|CCA1_ARATH Protein CCA1 OS=Arabidopsis thaliana GN=CCA1 PE=1 SV=1
response to stress	Lus10010133.g	0.26	0.23	0.25	0.37	3.77	3.01	1.53	1.59	0.51	0.61	0.45	0.35	2.38	0.89	1.29	1.1	GAV77008.1	BAG domain-containing protein [Cephalotus follicularis]	GO:0010228(vegetative to reproductive phase transition of meristem);GO:0050832(defense response to fungus);GO:0012502(induction of programmed cell death)	GO:0009506(plasmodesma)	GO:0051087(chaperone binding);GO:0005516(calmodulin binding)	*	*	*	sp|O82345|BAG6_ARATH	sp|O82345|BAG6_ARATH BAG family molecular chaperone regulator 6 OS=Arabidopsis thaliana GN=BAG6 PE=1 SV=1
response to stress	Lus10010140.g	23.48	38.74	24.59	20.01	39.49	6.78	133.92	142.47	109.94	105.14	91.01	106.92	28.95	7.26	132.97	151.6	ACU15464.1	unknown [Glycine max]	GO:0009269(response to desiccation)	*	*	*	*	*	sp|P46519|LEA14_SOYBN	sp|P46519|LEA14_SOYBN Desiccation protectant protein Lea14 homolog OS=Glycine max PE=2 SV=1
response to stress	Lus10011024.g	1.47	1.65	1.19	1.06	3.57	2.99	4.62	6.6	2.99	2.45	1.72	2.04	5.78	5.8	3.35	3.23	OAY60154.1	hypothetical protein MANES_01G089700 [Manihot esculenta]	GO:0006259(DNA metabolic process);GO:0006289(nucleotide-excision repair);GO:0006296(nucleotide-excision repair, DNA incision, 5'-to lesion);GO:1901255(nucleotide-excision repair involved in interstrand cross-link repair);GO:0000712(resolution of meiotic recombination intermediates);GO:0006979(response to oxidative stress);GO:0000724(double-strand break repair via homologous recombination)	GO:0000110(nucleotide-excision repair factor 1 complex)	GO:0003677(DNA binding);GO:0004518(nuclease activity);GO:0000014(single-stranded DNA endodeoxyribonuclease activity);GO:0003697(single-stranded DNA binding);GO:0003684(damaged DNA binding)	K10848|ERCC4, XPF|http://www.genome.jp/dbget-bin/www_bget?ko:K10848	ko03420(Nucleotide excision repair)	KOG0442(L)(Structure-specific endonuclease ERCC1-XPF, catalytic component XPF/ERCC4)	sp|Q9LKI5|XPF_ARATH	sp|Q9LKI5|XPF_ARATH DNA repair endonuclease UVH1 OS=Arabidopsis thaliana GN=UVH1 PE=1 SV=2
response to stress	Lus10011335.g	0.15	0.17	0	0.44	4.51	19.41	61.65	95.6	0.38	0	0.33	1.09	2.94	2.16	27.38	57.76	XP_017644879.1	PREDICTED: bidirectional sugar transporter SWEET15-like [Gossypium arboreum]	GO:0006810(transport);GO:0008643(carbohydrate transport);GO:0010150(leaf senescence);GO:0071470(cellular response to osmotic stress);GO:0015770(sucrose transport)	GO:0016021(integral component of membrane);GO:0016020(membrane);GO:0005886(plasma membrane);GO:0005887(integral component of plasma membrane)	GO:0051119(sugar transmembrane transporter activity);GO:0008515(sucrose transmembrane transporter activity)	K15382|SLC50A, SWEET|http://www.genome.jp/dbget-bin/www_bget?ko:K15382	*	*	sp|Q9FY94|SWT15_ARATH	sp|Q9FY94|SWT15_ARATH Bidirectional sugar transporter SWEET15 OS=Arabidopsis thaliana GN=SWEET15 PE=1 SV=1
response to stress	Lus10011499.g	1.28	0.68	0.73	0.38	3.73	0.49	2.19	24.68	14.53	38.66	8.34	13.82	0	2.37	1.54	1.36	OAY35817.1	hypothetical protein MANES_12G132900 [Manihot esculenta]	GO:0098542(defense response to other organism);GO:0044550(secondary metabolite biosynthetic process);GO:0055114(oxidation-reduction process)	GO:0016021(integral component of membrane);GO:0016020(membrane)	GO:0004497(monooxygenase activity);GO:0016709(oxidoreductase activity, acting on paired donors, with incorporation or reduction of molecular oxygen, NAD(P)H as one donor, and incorporation of one atom of oxygen);GO:0005506(iron ion binding);GO:0016705(oxidoreductase activity, acting on paired donors, with incorporation or reduction of molecular oxygen);GO:0016491(oxidoreductase activity);GO:00200…	K13029|CYP71E1|http://www.genome.jp/dbget-bin/www_bget?ko:K13029	ko00460(Cyanoamino acid metabolism)	*	sp|Q6XQ14|C71E7_MANES	sp|Q6XQ14|C71E7_MANES 2-methylbutanal oxime monooxygenase OS=Manihot esculenta GN=CYP71E7 PE=1 SV=1
response to stress	Lus10011696.g	10.53	10	9.47	10.48	22.51	27.5	25.48	26.79	17.85	16.44	15.9	19.38	22.32	20.47	38.09	29.69	XP_012077416.1	PREDICTED: tocopherol cyclase, chloroplastic [Jatropha curcas]	GO:0031347(regulation of defense response);GO:0010189(vitamin E biosynthetic process);GO:0006979(response to oxidative stress);GO:0016122(xanthophyll metabolic process);GO:0009644(response to high light intensity);GO:0015994(chlorophyll metabolic process);GO:0009266(response to temperature stimulus);GO:0009915(phloem sucrose loading);GO:0006631(fatty acid metabolic process)	GO:0009534(chloroplast thylakoid);GO:0009536(plastid);GO:0009706(chloroplast inner membrane);GO:0009941(chloroplast envelope);GO:0009507(chloroplast);GO:0010287(plastoglobule)	GO:0009976(tocopherol cyclase activity);GO:0016853(isomerase activity)	K09834|VTE1, SXD1|http://www.genome.jp/dbget-bin/www_bget?ko:K09834	ko00130(Ubiquinone and other terpenoid-quinone biosynthesis)	*	sp|Q94FY7|TOCC_ARATH	sp|Q94FY7|TOCC_ARATH Tocopherol cyclase, chloroplastic OS=Arabidopsis thaliana GN=VTE1 PE=2 SV=1
response to stress	Lus10011748.g	10.63	8.79	12.91	9.87	20.16	18.3	38.24	28.83	17.78	21.9	19.31	20.26	20.16	16.99	28.5	21.44	OAY55393.1	hypothetical protein MANES_03G150200 [Manihot esculenta]	GO:0008152(metabolic process);GO:0006635(fatty acid beta-oxidation);GO:0031408(oxylipin biosynthetic process);GO:0009611(response to wounding);GO:0006629(lipid metabolic process);GO:0009695(jasmonic acid biosynthetic process);GO:0010111(glyoxysome organization);GO:0009789(positive regulation of abscisic acid-activated signaling pathway);GO:0006633(fatty acid biosynthetic process);GO:0006631(fatty…	GO:0005730(nucleolus);GO:0005829(cytosol);GO:0016020(membrane);GO:0009514(glyoxysome);GO:0005739(mitochondrion);GO:0005777(peroxisome);GO:0009507(chloroplast);GO:0005774(vacuolar membrane)	GO:0016747(transferase activity, transferring acyl groups other than amino-acyl groups);GO:0016740(transferase activity);GO:0016746(transferase activity, transferring acyl groups);GO:0003824(catalytic activity);GO:0003988(acetyl-CoA C-acyltransferase activity)	K07513|ACAA1|http://www.genome.jp/dbget-bin/www_bget?ko:K07513	ko04146(Peroxisome);ko00280(Valine, leucine and isoleucine degradation);ko01040(Biosynthesis of unsaturated fatty acids);ko00071(Fatty acid degradation);ko00592(alpha-Linolenic acid metabolism);ko01212(Fatty acid metabolism)	KOG1390(I)(Acetyl-CoA acetyltransferase)	sp|Q56WD9|THIK2_ARATH	sp|Q56WD9|THIK2_ARATH 3-ketoacyl-CoA thiolase 2, peroxisomal OS=Arabidopsis thaliana GN=PED1 PE=1 SV=2
response to stress	Lus10011777.g	173.84	193.16	170.77	196.26	700.58	936.09	503.42	733.29	89.48	72.75	80.25	72.68	709.32	584.3	732.17	770.1	XP_006298647.1	hypothetical protein CARUB_v10014736mg, partial [Capsella rubella]	GO:0071484(cellular response to light intensity);GO:0009773(photosynthetic electron transport in photosystem I);GO:0055114(oxidation-reduction process);GO:0010117(photoprotection);GO:0009414(response to water deprivation);GO:0009644(response to high light intensity)	GO:0009534(chloroplast thylakoid);GO:0009579(thylakoid);GO:0016020(membrane);GO:0009536(plastid);GO:0009535(chloroplast thylakoid membrane);GO:0009507(chloroplast)	GO:0009055(electron carrier activity);GO:0005515(protein binding)	*	*	*	sp|Q9SL05|PGR5_ARATH	sp|Q9SL05|PGR5_ARATH Protein PROTON GRADIENT REGULATION 5, chloroplastic OS=Arabidopsis thaliana GN=PGR5 PE=1 SV=1
response to stress	Lus10011803.g	66.19	66.68	55.78	68.47	81.66	101.49	247.79	247.82	130.1	178.99	183.04	160.12	74.42	54.79	139.31	127.92	XP_002528825.1	PREDICTED: probable plastid-lipid-associated protein 6, chloroplastic [Ricinus communis]	GO:0042742(defense response to bacterium);GO:0009658(chloroplast organization);GO:0010193(response to ozone)	GO:0009534(chloroplast thylakoid);GO:0005886(plasma membrane);GO:0009579(thylakoid);GO:0016020(membrane);GO:0031977(thylakoid lumen);GO:0009535(chloroplast thylakoid membrane);GO:0009941(chloroplast envelope);GO:0009507(chloroplast);GO:0010287(plastoglobule);GO:0005634(nucleus)	*	*	*	*	sp|Q9LW57|PAP6_ARATH	sp|Q9LW57|PAP6_ARATH Plastid-lipid-associated protein 6, chloroplastic OS=Arabidopsis thaliana GN=PAP6 PE=1 SV=1
response to stress	Lus10011880.g	3.58	4.01	2.61	2.1	1.66	2.49	6.18	8.71	10.04	7.93	6.92	8.04	2.21	1.91	4.61	5.08	XP_006372938.1	hypothetical protein POPTR_0017s06400g [Populus trichocarpa]	GO:0000245(spliceosomal complex assembly);GO:0000387(spliceosomal snRNP assembly);GO:0070417(cellular response to cold);GO:0000380(alternative mRNA splicing, via spliceosome)	GO:0005681(spliceosomal complex);GO:0005634(nucleus)	GO:0003674(molecular_function)	K13130|GEMIN2, SIP1|http://www.genome.jp/dbget-bin/www_bget?ko:K13130	ko03013(RNA transport)	*	sp|O42260|GEMI2_XENLA	sp|O42260|GEMI2_XENLA Gem-associated protein 2 OS=Xenopus laevis GN=gemin2 PE=2 SV=1
response to stress	Lus10011929.g	15.77	20.62	18.49	17.01	67.59	47.41	104.08	83.37	49.42	72.9	52.97	56.3	59.61	52.54	84.93	73.51	OAY26955.1	hypothetical protein MANES_16G088300 [Manihot esculenta]	GO:0031347(regulation of defense response);GO:2000022(regulation of jasmonic acid mediated signaling pathway);GO:0009611(response to wounding);GO:1903507(negative regulation of nucleic acid-templated transcription)	GO:0005634(nucleus);GO:0016021(integral component of membrane);GO:0016020(membrane)	GO:0003714(transcription corepressor activity)	K13464|JAZ|http://www.genome.jp/dbget-bin/www_bget?ko:K13464	ko04075(Plant hormone signal transduction)	*	sp|Q9C5K8|TIF3B_ARATH	sp|Q9C5K8|TIF3B_ARATH Protein TIFY 3B OS=Arabidopsis thaliana GN=TIFY3B PE=1 SV=1
response to stress	Lus10011934.g	5.92	7.1	5.15	5.01	3.15	4.77	6.2	5.89	13.78	12.57	15.41	15.35	3.18	3.62	7.6	9.96	XP_012065513.1	PREDICTED: chaperone protein dnaJ 1, mitochondrial [Jatropha curcas]	GO:0009408(response to heat);GO:0006457(protein folding)	GO:0005737(cytoplasm)	GO:0005524(ATP binding);GO:0031072(heat shock protein binding);GO:0051082(unfolded protein binding);GO:0046872(metal ion binding)	K03686|dnaJ|http://www.genome.jp/dbget-bin/www_bget?ko:K03686	*	KOG0712(O)(Molecular chaperone (DnaJ superfamily))	sp|Q8GWW8|GFA2_ARATH	sp|Q8GWW8|GFA2_ARATH Chaperone protein dnaJ GFA2, mitochondrial OS=Arabidopsis thaliana GN=GFA2 PE=2 SV=1
response to stress	Lus10012329.g	3.52	4.08	2.15	2.04	3.97	4.67	7.46	7.22	11.18	10.45	9.94	11.81	3.78	1.5	3.04	5.9	XP_019435734.1	PREDICTED: heat shock protein 90-6, mitochondrial [Lupinus angustifolius]	GO:0006950(response to stress);GO:0006457(protein folding)	*	GO:0051082(unfolded protein binding);GO:0005524(ATP binding)	K09487|HSP90B, TRA1|http://www.genome.jp/dbget-bin/www_bget?ko:K09487	ko04141(Protein processing in endoplasmic reticulum);ko04626(Plant-pathogen interaction)	KOG0020(O)(Endoplasmic reticulum glucose-regulated protein (GRP94/endoplasmin), HSP90 family)	sp|F4JFN3|HS906_ARATH	sp|F4JFN3|HS906_ARATH Heat shock protein 90-6, mitochondrial OS=Arabidopsis thaliana GN=HSP90-6 PE=2 SV=1
response to stress	Lus10012632.g	9.16	9.55	7.81	8.25	12.92	20.14	18.72	26.84	25.84	19.67	19.65	23.03	18.43	15.03	34.68	34.92	XP_002302626.1	autophagy protein Apg6 [Populus trichocarpa]	GO:0006623(protein targeting to vacuole);GO:0006914(autophagy);GO:0000045(autophagosome assembly);GO:0032258(CVT pathway);GO:0009846(pollen germination);GO:0044804(nucleophagy);GO:0045324(late endosome to vacuole transport);GO:0006995(cellular response to nitrogen starvation)	GO:0034271(phosphatidylinositol 3-kinase complex, class III, type I);GO:0034272(phosphatidylinositol 3-kinase complex, class III, type II);GO:0000407(pre-autophagosomal structure)	*	K08334|BECN1, VPS30, ATG6|http://www.genome.jp/dbget-bin/www_bget?ko:K08334	ko04136(Autophagy - other eukaryotes)	KOG2751(T)(Beclin-like protein)	sp|Q9M367|BECN1_ARATH	sp|Q9M367|BECN1_ARATH Beclin-1-like protein OS=Arabidopsis thaliana GN=ATG6 PE=1 SV=2
response to stress	Lus10012657.g	19.05	17.33	20.11	18.3	27.38	31.02	69.58	64.41	74.84	73.85	60.64	71.67	20.75	21.75	58.12	71.9	XP_012087989.1	PREDICTED: uncharacterized protein LOC105646691 [Jatropha curcas]	GO:0048366(leaf development);GO:0009648(photoperiodism);GO:0000302(response to reactive oxygen species)	GO:0016021(integral component of membrane);GO:0016020(membrane);GO:0009536(plastid);GO:0009941(chloroplast envelope);GO:0009507(chloroplast);GO:0005739(mitochondrion);GO:0009706(chloroplast inner membrane)	*	*	*	*	sp|B9DFK5|RETIC_ARATH	sp|B9DFK5|RETIC_ARATH Protein RETICULATA, chloroplastic OS=Arabidopsis thaliana GN=RE PE=1 SV=1
response to stress	Lus10012849.g	4.46	5.1	5.96	4.42	7.32	7.44	11.81	14.27	15.92	15.98	11.71	11.69	8.51	10.05	14.75	13.82	XP_012091582.1	PREDICTED: general transcription factor IIH subunit 4 [Jatropha curcas]	GO:0006289(nucleotide-excision repair);GO:0070816(phosphorylation of RNA polymerase II C-terminal domain);GO:0006974(cellular response to DNA damage stimulus);GO:0006351(transcription, DNA-templated);GO:0006355(regulation of transcription, DNA-templated);GO:0006281(DNA repair)	GO:0000439(core TFIIH complex);GO:0005634(nucleus);GO:0005675(holo TFIIH complex)	GO:0004003(ATP-dependent DNA helicase activity);GO:0008353(RNA polymerase II carboxy-terminal domain kinase activity);GO:0003700(transcription factor activity, sequence-specific DNA binding);GO:0003690(double-stranded DNA binding)	K03144|TFIIH4, GTF2H4, TFB2|http://www.genome.jp/dbget-bin/www_bget?ko:K03144	ko03420(Nucleotide excision repair);ko03022(Basal transcription factors)	KOG3471(KL)(RNA polymerase II transcription initiation/nucleotide excision repair factor TFIIH, subunit TFB2)	sp|Q680U9|TFB2_ARATH	sp|Q680U9|TFB2_ARATH RNA polymerase II transcription factor B subunit 2 OS=Arabidopsis thaliana GN=TFB2 PE=2 SV=1
response to stress	Lus10013155.g	32.39	31.19	37.94	36.86	109.73	136.69	835.32	1088.55	351.2	412.68	244.42	267.17	123.97	138.67	868.16	936.2	XP_011035738.1	PREDICTED: aldehyde dehydrogenase family 7 member B4 isoform X1 [Populus euphratica]	GO:0008152(metabolic process);GO:0055114(oxidation-reduction process);GO:0009737(response to abscisic acid);GO:0006081(cellular aldehyde metabolic process);GO:0009651(response to salt stress);GO:0009269(response to desiccation)	GO:0005829(cytosol);GO:0005737(cytoplasm)	GO:0016620(oxidoreductase activity, acting on the aldehyde or oxo group of donors, NAD or NADP as acceptor);GO:0016491(oxidoreductase activity);GO:0004029(aldehyde dehydrogenase (NAD) activity);GO:0004028(3-chloroallyl aldehyde dehydrogenase activity)	K14085|ALDH7A1|http://www.genome.jp/dbget-bin/www_bget?ko:K14085	ko00330(Arginine and proline metabolism);ko00260(Glycine, serine and threonine metabolism);ko00340(Histidine metabolism);ko00300(Lysine biosynthesis);ko00310(Lysine degradation);ko00380(Tryptophan metabolism);ko00280(Valine, leucine and isoleucine degradation);ko00053(Ascorbate and aldarate metabolism);ko00010(Glycolysis / Gluconeogenesis);ko00620(Pyruvate metabolism);ko00071(Fatty acid degradati…	KOG2451(C)(Aldehyde dehydrogenase);KOG2450(C)(Aldehyde dehydrogenase);KOG2449(EG)(Methylmalonate semialdehyde dehydrogenase)	sp|Q9SYG7|AL7B4_ARATH;sp|Q9ZPB7|AL7A1_MALDO;sp|P25795|AL7A1_PEA;sp|Q41247|AL7A1_BRANA	sp|Q9SYG7|AL7B4_ARATH Aldehyde dehydrogenase family 7 member B4 OS=Arabidopsis thaliana GN=ALDH7B4 PE=2 SV=3;sp|Q9ZPB7|AL7A1_MALDO Aldehyde dehydrogenase family 7 member A1 OS=Malus domestica PE=1 SV=3;sp|P25795|AL7A1_PEA Aldehyde dehydrogenase family 7 member A1 OS=Pisum sativum PE=1 SV=3;sp|Q41247|AL7A1_BRANA Aldehyde dehydrogenase family 7 member A1 OS=Brassica napus GN=BTG-26 PE=1 SV=3
response to stress	Lus10013166.g	10.41	0.12	4.62	1.33	24.32	8.78	126.04	13.74	10.23	28.4	3.27	2.94	17.3	14.6	8.34	17.22	XP_012068852.1	PREDICTED: protein TIFY 10A-like [Jatropha curcas]	GO:0031347(regulation of defense response);GO:2000022(regulation of jasmonic acid mediated signaling pathway);GO:0009611(response to wounding);GO:1903507(negative regulation of nucleic acid-templated transcription)	GO:0005634(nucleus)	GO:0003714(transcription corepressor activity)	K13464|JAZ|http://www.genome.jp/dbget-bin/www_bget?ko:K13464	ko04075(Plant hormone signal transduction)	*	sp|Q84R94|TI10A_ORYSJ;sp|Q8H395|TI10B_ORYSJ	sp|Q84R94|TI10A_ORYSJ Protein TIFY 10a OS=Oryza sativa subsp. japonica GN=TIFY10A PE=1 SV=1;sp|Q8H395|TI10B_ORYSJ Protein TIFY 10b OS=Oryza sativa subsp. japonica GN=TIFY10B PE=1 SV=1
response to stress	Lus10013191.g	22.98	23.84	26.39	25.35	24.16	45.17	89.95	128.49	68.05	53.29	58.16	58.76	40.25	31.14	102.06	80.61	XP_002526076.1	PREDICTED: chaperone protein ClpB3, chloroplastic [Ricinus communis]	GO:0009408(response to heat);GO:0019538(protein metabolic process);GO:0016485(protein processing);GO:0009658(chloroplast organization)	GO:0005737(cytoplasm);GO:0009532(plastid stroma);GO:0009507(chloroplast);GO:0009570(chloroplast stroma)	GO:0005524(ATP binding);GO:0000166(nucleotide binding)	K03695|clpB|http://www.genome.jp/dbget-bin/www_bget?ko:K03695	*	KOG1051(O)(Chaperone HSP104 and related ATP-dependent Clp proteases)	sp|Q9LF37|CLPB3_ARATH	sp|Q9LF37|CLPB3_ARATH Chaperone protein ClpB3, chloroplastic OS=Arabidopsis thaliana GN=CLPB3 PE=1 SV=1
response to stress	Lus10013244.g	1.71	1.45	2.39	1.72	3.55	4.07	3.74	4.23	3.99	3.53	3.13	3.28	8.26	5.94	5.31	5.76	OAY24641.1	hypothetical protein MANES_17G031800 [Manihot esculenta]	GO:0048544(recognition of pollen);GO:0045087(innate immune response);GO:0006468(protein phosphorylation)	GO:0005886(plasma membrane);GO:0009506(plasmodesma)	GO:0031625(ubiquitin protein ligase binding);GO:0004672(protein kinase activity);GO:0005524(ATP binding);GO:0004674(protein serine/threonine kinase activity)	*	*	*	sp|O81832|Y4729_ARATH;sp|Q9ZT07|RKS1_ARATH;sp|Q9LPZ3|Y1141_ARATH	sp|O81832|Y4729_ARATH G-type lectin S-receptor-like serine/threonine-protein kinase At4g27290 OS=Arabidopsis thaliana GN=At4g27290 PE=3 SV=4;sp|Q9ZT07|RKS1_ARATH G-type lectin S-receptor-like serine/threonine-protein kinase RKS1 OS=Arabidopsis thaliana GN=RKS1 PE=3 SV=3;sp|Q9LPZ3|Y1141_ARATH G-type lectin S-receptor-like serine/threonine-protein kinase At1g11410 OS=Arabidopsis thaliana GN=At1g114…
response to stress	Lus10013364.g	29.83	31.76	32.58	35.74	351.68	211.01	166.87	139	59.08	63.6	57.78	57.12	263.17	151.16	110.91	93.01	XP_002313505.1	seed maturation protein PM37 [Populus trichocarpa]	GO:0009408(response to heat);GO:0006457(protein folding)	*	GO:0051082(unfolded protein binding);GO:0046872(metal ion binding);GO:0005524(ATP binding);GO:0031072(heat shock protein binding)	K09503|DNAJA2|http://www.genome.jp/dbget-bin/www_bget?ko:K09503	ko04141(Protein processing in endoplasmic reticulum)	KOG0712(O)(Molecular chaperone (DnaJ superfamily))	sp|P42824|DNJH2_ALLPO	sp|P42824|DNJH2_ALLPO DnaJ protein homolog 2 OS=Allium porrum GN=LDJ2 PE=2 SV=1
response to stress	Lus10013537.g	273.1	277.31	341.56	284.78	667.05	541.9	988.17	790.62	519.7	413.29	325.64	351.1	1328.13	839.82	741.54	669.86	XP_010112332.1	L-ascorbate peroxidase [Morus notabilis]	GO:0006979(response to oxidative stress);GO:0055114(oxidation-reduction process)	GO:0016020(membrane);GO:0016021(integral component of membrane)	GO:0004601(peroxidase activity);GO:0020037(heme binding)	K00434|E1.11.1.11|http://www.genome.jp/dbget-bin/www_bget?ko:K00434	ko00053(Ascorbate and aldarate metabolism);ko00480(Glutathione metabolism)	*	sp|P48534|APX1_PEA	sp|P48534|APX1_PEA L-ascorbate peroxidase, cytosolic OS=Pisum sativum GN=APX1 PE=1 SV=2
response to stress	Lus10013631.g	0	0.22	0.4	0.06	0.99	0.56	4.21	3.44	0.33	0.15	1.36	0.46	0.7	0.85	3.09	3.94	XP_010055033.1	PREDICTED: peroxidase 57 [Eucalyptus grandis]	GO:0042744(hydrogen peroxide catabolic process);GO:0006979(response to oxidative stress);GO:0055114(oxidation-reduction process)	GO:0005576(extracellular region);GO:0016020(membrane);GO:0016021(integral component of membrane)	GO:0016491(oxidoreductase activity);GO:0004601(peroxidase activity);GO:0020037(heme binding);GO:0046872(metal ion binding)	K00430|E1.11.1.7|http://www.genome.jp/dbget-bin/www_bget?ko:K00430	ko00940(Phenylpropanoid biosynthesis)	*	sp|Q43729|PER57_ARATH	sp|Q43729|PER57_ARATH Peroxidase 57 OS=Arabidopsis thaliana GN=PER57 PE=1 SV=1
response to stress	Lus10013673.g	48.18	43.92	64.5	55.65	75.85	83.47	154.96	152.91	142.92	138.33	118.45	133.34	95.09	98.38	169.1	193.66	XP_011040441.1	PREDICTED: peptide methionine sulfoxide reductase-like [Populus euphratica]	GO:0030091(protein repair);GO:0006979(response to oxidative stress);GO:0055114(oxidation-reduction process)	*	GO:0008113(peptide-methionine (S)-S-oxide reductase activity);GO:0016671(oxidoreductase activity, acting on a sulfur group of donors, disulfide as acceptor)	K07304|msrA|http://www.genome.jp/dbget-bin/www_bget?ko:K07304	*	KOG1635(O)(Peptide methionine sulfoxide reductase)	sp|P54153|MSRA_SOLLC;sp|P54152|MSRA_FRAAN	sp|P54153|MSRA_SOLLC Peptide methionine sulfoxide reductase (Fragment) OS=Solanum lycopersicum GN=E4 PE=3 SV=1;sp|P54152|MSRA_FRAAN Peptide methionine sulfoxide reductase OS=Fragaria ananassa PE=2 SV=2
response to stress	Lus10013827.g	34.18	36.33	42.16	41.69	48.72	34.08	76.75	75.42	121.55	100.88	106.21	130.14	45.94	28.64	87.5	95.16	XP_006381396.1	hypothetical protein POPTR_0006s12500g [Populus trichocarpa]	GO:0045454(cell redox homeostasis);GO:0000103(sulfate assimilation);GO:0006457(protein folding);GO:0034599(cellular response to oxidative stress);GO:0055114(oxidation-reduction process);GO:0006662(glycerol ether metabolic process)	GO:0005737(cytoplasm)	GO:0016671(oxidoreductase activity, acting on a sulfur group of donors, disulfide as acceptor);GO:0015035(protein disulfide oxidoreductase activity)	K03671|trxA|http://www.genome.jp/dbget-bin/www_bget?ko:K03671	*	KOG0907(O)(Thioredoxin)	sp|Q7XSQ7|TRL33_ORYSJ;sp|Q8LCH9|TRL33_ARATH	sp|Q7XSQ7|TRL33_ORYSJ Thioredoxin-like 3-3 OS=Oryza sativa subsp. japonica GN=Os04g0560200 PE=2 SV=2;sp|Q8LCH9|TRL33_ARATH Thioredoxin-like 3-3 OS=Arabidopsis thaliana GN=At3g53220 PE=2 SV=1
response to stress	Lus10013900.g	0	0	0	0	9.09	16.23	35.72	36.89	2.08	4.18	0	0.6	0	0	5.35	2.35	XP_004289812.1	PREDICTED: uncharacterized protein LOC101294520 [Fragaria vesca subsp. vesca]	GO:0006950(response to stress)	*	*	*	*	*	*	*
response to stress	Lus10014000.g	1.18	2.02	1.03	0.85	0.59	0.88	1.71	3.11	4.5	3.75	4	4.03	1.18	0.65	1.82	3.92	EEF47797.1	S-locus-specific glycoprotein S6 precursor, putative [Ricinus communis]	GO:0016310(phosphorylation);GO:0006952(defense response);GO:0006468(protein phosphorylation);GO:0048544(recognition of pollen)	GO:0005886(plasma membrane);GO:0016020(membrane);GO:0016021(integral component of membrane);GO:0009506(plasmodesma)	GO:0004672(protein kinase activity);GO:0004674(protein serine/threonine kinase activity);GO:0016301(kinase activity);GO:0016740(transferase activity);GO:0005524(ATP binding);GO:0000166(nucleotide binding)	*	*	*	sp|Q9ZT07|RKS1_ARATH;sp|Q9LPZ3|Y1141_ARATH	sp|Q9ZT07|RKS1_ARATH G-type lectin S-receptor-like serine/threonine-protein kinase RKS1 OS=Arabidopsis thaliana GN=RKS1 PE=3 SV=3;sp|Q9LPZ3|Y1141_ARATH G-type lectin S-receptor-like serine/threonine-protein kinase At1g11410 OS=Arabidopsis thaliana GN=At1g11410 PE=3 SV=3
response to stress	Lus10014069.g	18.76	17.77	27.27	22.05	27.27	28.82	42.86	45.94	71.55	64.33	70.24	70.68	26.46	34.72	40.57	54.92	AEC03325.1	mitochondrial thioredoxin 2 [Hevea brasiliensis]	GO:0055114(oxidation-reduction process);GO:0043085(positive regulation of catalytic activity);GO:0045454(cell redox homeostasis);GO:0000103(sulfate assimilation);GO:0006457(protein folding);GO:0034599(cellular response to oxidative stress);GO:0006662(glycerol ether metabolic process)	GO:0009507(chloroplast)	GO:0016671(oxidoreductase activity, acting on a sulfur group of donors, disulfide as acceptor);GO:0008047(enzyme activator activity);GO:0015035(protein disulfide oxidoreductase activity)	K03671|trxA|http://www.genome.jp/dbget-bin/www_bget?ko:K03671	*	KOG0910(O)(Thioredoxin-like protein)	sp|Q9SEU7|TRXM3_ARATH	sp|Q9SEU7|TRXM3_ARATH Thioredoxin M3, chloroplastic OS=Arabidopsis thaliana GN=GAT1 PE=2 SV=2
response to stress	Lus10014280.g	0	0.42	0.52	0.58	0	0.41	159.76	60.55	193.3	200.1	72.9	99.46	0	0.23	57.24	18.11	XP_002521515.1	PREDICTED: dehydrin Xero 1 [Ricinus communis]	GO:0006950(response to stress);GO:0009415(response to water)	*	*	*	*	*	sp|P25863|XERO1_ARATH;sp|P12950|DHN1_MAIZE	sp|P25863|XERO1_ARATH Dehydrin Xero 1 OS=Arabidopsis thaliana GN=XERO1 PE=2 SV=2;sp|P12950|DHN1_MAIZE Dehydrin DHN1 OS=Zea mays GN=DHN1 PE=1 SV=2
response to stress	Lus10014462.g	1.82	1.73	1.09	1.01	1.24	1.01	2.99	3.11	4.13	3.88	3.66	4.15	0.85	0.53	2.11	1.93	XP_011041450.1	PREDICTED: DNA mismatch repair protein MSH1, mitochondrial isoform X1 [Populus euphratica]	GO:0006298(mismatch repair);GO:0007131(reciprocal meiotic recombination);GO:0000710(meiotic mismatch repair)	GO:0032300(mismatch repair complex);GO:0000228(nuclear chromosome)	GO:0030983(mismatched DNA binding);GO:0005524(ATP binding);GO:0003684(damaged DNA binding)	*	*	KOG0217(L)(Mismatch repair ATPase MSH6 (MutS family))	sp|Q84LK0|MSH1_ARATH	sp|Q84LK0|MSH1_ARATH DNA mismatch repair protein MSH1, mitochondrial OS=Arabidopsis thaliana GN=MSH1 PE=1 SV=1
response to stress	Lus10014508.g	0.42	2.27	3.33	0.76	1.64	2.04	10.36	1.79	1.21	1.77	16.49	5.49	8.02	11.32	56.37	2.33	XP_010245449.1	PREDICTED: major allergen Pru ar 1-like [Nelumbo nucifera]	GO:0009607(response to biotic stimulus);GO:0006952(defense response)	*	*	*	*	*	sp|O50001|PRU1_PRUAR	sp|O50001|PRU1_PRUAR Major allergen Pru ar 1 OS=Prunus armeniaca PE=1 SV=1
response to stress	Lus10014545.g	19.07	24.74	27.25	25.99	107.57	105.86	286.81	429.52	205.27	172.49	129.01	147.76	74.66	86.99	381.16	297.04	XP_015879073.1	PREDICTED: universal stress protein A-like protein [Ziziphus jujuba]	GO:0006950(response to stress)	*	*	*	*	*	sp|Q8LGG8|USPAL_ARATH	sp|Q8LGG8|USPAL_ARATH Universal stress protein A-like protein OS=Arabidopsis thaliana GN=At3g01520 PE=1 SV=2
response to stress	Lus10014702.g	32.98	28.36	29.57	40.22	52.12	7.07	43.48	17.37	173.85	228.48	141.28	126.99	18.18	17.51	19.14	30.97	XP_015575829.1	PREDICTED: LOW QUALITY PROTEIN: chlorophyllase-1 [Ricinus communis]	GO:0015996(chlorophyll catabolic process);GO:0042742(defense response to bacterium);GO:0050832(defense response to fungus)	GO:0005773(vacuole)	GO:0047746(chlorophyllase activity)	K08099|E3.1.1.14|http://www.genome.jp/dbget-bin/www_bget?ko:K08099	ko00860(Porphyrin and chlorophyll metabolism)	*	sp|Q9LE89|CLH0_CHEAL	sp|Q9LE89|CLH0_CHEAL Chlorophyllase type 0 OS=Chenopodium album GN=CACLH PE=1 SV=1
response to stress	Lus10014712.g	0.37	0.34	0.73	0.37	0.83	0.77	0.49	0.56	1.77	1.62	1.08	1.45	1.01	0.97	1.11	1.25	XP_002525518.1	PREDICTED: disease resistance protein RPM1 [Ricinus communis]	GO:0006952(defense response)	*	GO:0004721(phosphoprotein phosphatase activity);GO:0043531(ADP binding);GO:0016787(hydrolase activity)	K13457|RPM1, RPS3|http://www.genome.jp/dbget-bin/www_bget?ko:K13457	ko04626(Plant-pathogen interaction)	*	sp|Q39214|RPM1_ARATH	sp|Q39214|RPM1_ARATH Disease resistance protein RPM1 OS=Arabidopsis thaliana GN=RPM1 PE=1 SV=1
response to stress	Lus10014740.g	31.43	37.76	43.92	6.06	216.13	418.88	3474.96	7392.08	1548.88	1245.33	458.92	172.89	66.96	213.27	580.25	1175.11	1DWM_A	Chain A, Solution Structure Of Linum Usitatissinum Trypsin Inhibitor (Luti)	GO:0009611(response to wounding)	*	GO:0004867(serine-type endopeptidase inhibitor activity)	*	*	*	sp|P82381|ICI_LINUS	sp|P82381|ICI_LINUS Proteinase inhibitor OS=Linum usitatissimum PE=1 SV=1
response to stress	Lus10014795.g	6.06	8.8	8.52	7.9	15.47	17.18	25.42	25.16	35.17	26.46	25.39	29.44	15.3	14.89	32.13	32.78	XP_012075726.1	PREDICTED: probable phosphopantothenoylcysteine decarboxylase [Jatropha curcas]	GO:0001558(regulation of cell growth);GO:0070207(protein homotrimerization);GO:0009651(response to salt stress)	*	GO:0003824(catalytic activity);GO:0004633(phosphopantothenoylcysteine decarboxylase activity);GO:0016829(lyase activity);GO:0010181(FMN binding)	K01598|PPCDC, coaC|http://www.genome.jp/dbget-bin/www_bget?ko:K01598	ko00770(Pantothenate and CoA biosynthesis)	KOG0672(PD)(Halotolerance protein HAL3 (contains flavoprotein domain))	sp|Q9SWE5|HAL3A_ARATH	sp|Q9SWE5|HAL3A_ARATH Phosphopantothenoylcysteine decarboxylase OS=Arabidopsis thaliana GN=HAL3A PE=1 SV=1
response to stress	Lus10014812.g	0.32	0.29	0.08	0	0.83	0.08	0.99	1.23	1.32	1.07	0.22	0.19	0.25	0.22	0.05	0.3	OAY54980.1	hypothetical protein MANES_03G118100 [Manihot esculenta]	GO:0016310(phosphorylation);GO:0006468(protein phosphorylation);GO:0048544(recognition of pollen);GO:0006952(defense response)	GO:0016020(membrane);GO:0016021(integral component of membrane);GO:0005886(plasma membrane);GO:0009506(plasmodesma)	GO:0004672(protein kinase activity);GO:0004674(protein serine/threonine kinase activity);GO:0016301(kinase activity);GO:0016740(transferase activity);GO:0005524(ATP binding);GO:0000166(nucleotide binding);GO:0030246(carbohydrate binding)	*	*	*	sp|O81833|SD11_ARATH	sp|O81833|SD11_ARATH G-type lectin S-receptor-like serine/threonine-protein kinase SD1-1 OS=Arabidopsis thaliana GN=SD11 PE=1 SV=1
response to stress	Lus10014922.g	0.19	0.1	1.03	0.53	1.11	0.69	1.89	2.1	1.4	0.82	1.17	0.87	2.91	1.87	4.21	3.24	XP_002301573.2	Disease resistance protein RPM1 [Populus trichocarpa]	GO:0006952(defense response)	*	GO:0043531(ADP binding)	K13457|RPM1, RPS3|http://www.genome.jp/dbget-bin/www_bget?ko:K13457	ko04626(Plant-pathogen interaction)	*	sp|Q39214|RPM1_ARATH	sp|Q39214|RPM1_ARATH Disease resistance protein RPM1 OS=Arabidopsis thaliana GN=RPM1 PE=1 SV=1
response to stress	Lus10014964.g	40.74	50.84	51.68	43.92	152.82	120.59	180.09	170.39	119.58	117.61	105.25	119.03	135.02	96.49	192.68	181.39	JAT45454.1	Heat shock protein 83, partial [Anthurium amnicola]	GO:0006950(response to stress);GO:0006457(protein folding)	*	GO:0051082(unfolded protein binding);GO:0005524(ATP binding)	K04079|htpG, HSP90A|http://www.genome.jp/dbget-bin/www_bget?ko:K04079	ko04141(Protein processing in endoplasmic reticulum);ko04626(Plant-pathogen interaction)	KOG0020(O)(Endoplasmic reticulum glucose-regulated protein (GRP94/endoplasmin), HSP90 family)	sp|P36182|HSP82_TOBAC;sp|P27323|HS901_ARATH	sp|P36182|HSP82_TOBAC Heat shock protein 82 (Fragment) OS=Nicotiana tabacum GN=HSP82 PE=2 SV=1;sp|P27323|HS901_ARATH Heat shock protein 90-1 OS=Arabidopsis thaliana GN=HSP90-1 PE=1 SV=3
response to stress	Lus10015127.g	8.83	2.98	3.02	1.37	9.65	11.57	53.51	59.31	169.06	186.22	227.26	254.73	2.4	1.15	19.34	65.71	XP_002515749.1	PREDICTED: peroxidase 3 [Ricinus communis]	GO:0042744(hydrogen peroxide catabolic process);GO:0006979(response to oxidative stress);GO:0055114(oxidation-reduction process);GO:0009664(plant-type cell wall organization)	GO:0005576(extracellular region);GO:0009505(plant-type cell wall)	GO:0016491(oxidoreductase activity);GO:0004601(peroxidase activity);GO:0020037(heme binding);GO:0046872(metal ion binding)	K00430|E1.11.1.7|http://www.genome.jp/dbget-bin/www_bget?ko:K00430	ko00940(Phenylpropanoid biosynthesis)	*	sp|O23044|PER3_ARATH	sp|O23044|PER3_ARATH Peroxidase 3 OS=Arabidopsis thaliana GN=PER3 PE=2 SV=1
response to stress	Lus10015220.g	3.27	3.75	5.36	3.8	4.74	7.02	13.93	11.74	13.01	14.7	11.47	13.63	5.14	6.62	9.39	13.69	XP_002531104.1	PREDICTED: DNA repair protein RAD51 homolog 4 isoform X2 [Ricinus communis]	GO:0006281(DNA repair);GO:0007131(reciprocal meiotic recombination);GO:0006312(mitotic recombination);GO:0042148(strand invasion);GO:0000707(meiotic DNA recombinase assembly);GO:0010212(response to ionizing radiation)	GO:0033063(Rad51B-Rad51C-Rad51D-XRCC2 complex);GO:0005657(replication fork)	GO:0008094(DNA-dependent ATPase activity);GO:0003677(DNA binding);GO:0005524(ATP binding);GO:0003697(single-stranded DNA binding);GO:0004520(endodeoxyribonuclease activity);GO:0003690(double-stranded DNA binding);GO:0000150(recombinase activity);GO:0000400(four-way junction DNA binding)	K10871|RAD51L3, RAD51D|http://www.genome.jp/dbget-bin/www_bget?ko:K10871	ko03440(Homologous recombination)	KOG1564(L)(DNA repair protein RHP57)	sp|Q9LQQ2|RA51D_ARATH	sp|Q9LQQ2|RA51D_ARATH DNA repair protein RAD51 homolog 4 OS=Arabidopsis thaliana GN=RAD51D PE=2 SV=2
response to stress	Lus10015339.g	12.44	26.25	62.12	25.84	110.69	23.09	150.31	37.66	20.28	70.51	51.83	17.15	254.01	124.29	326.26	108.41	XP_007051017.1	PREDICTED: pathogenesis-related protein STH-2 [Theobroma cacao]	GO:0009607(response to biotic stimulus);GO:0006952(defense response)	*	*	*	*	*	sp|Q40280|MAL12_MALDO	sp|Q40280|MAL12_MALDO Major allergen Mal d 1 OS=Malus domestica PE=1 SV=3
response to stress	Lus10015505.g	0.76	1.14	0.41	0.27	0.6	0.28	0.57	0.86	2.26	1.04	1.19	0.94	1	0.92	1.4	1.59	XP_015582002.1	PREDICTED: replication protein A 32 kDa subunit B isoform X1 [Ricinus communis]	GO:0006310(DNA recombination);GO:0006281(DNA repair);GO:0006260(DNA replication)	GO:0005634(nucleus)	GO:0003677(DNA binding);GO:0003676(nucleic acid binding)	K10739|RFA2, RPA2|http://www.genome.jp/dbget-bin/www_bget?ko:K10739	ko03030(DNA replication);ko03440(Homologous recombination);ko03430(Mismatch repair);ko03420(Nucleotide excision repair)	*	sp|Q8LFJ8|RFA2B_ARATH	sp|Q8LFJ8|RFA2B_ARATH Replication protein A 32 kDa subunit B OS=Arabidopsis thaliana GN=RPA2B PE=2 SV=1
response to stress	Lus10015656.g	12.48	12.31	15.75	12.64	19.69	19.1	48.42	47.29	11.47	12.68	13.03	12.53	26.1	18.39	35.2	22.72	OAY36409.1	hypothetical protein MANES_11G019500 [Manihot esculenta]	GO:0015969(guanosine tetraphosphate metabolic process);GO:0042594(response to starvation)	GO:0009507(chloroplast)	GO:0008893(guanosine-3',5'-bis(diphosphate) 3'-diphosphatase activity);GO:0008728(GTP diphosphokinase activity)	*	*	*	sp|Q9SYH1|RSH3C_ARATH;sp|Q9M5P5|RSH3L_ARATH	sp|Q9SYH1|RSH3C_ARATH Probable GTP diphosphokinase RSH3, chloroplastic OS=Arabidopsis thaliana GN=RSH3 PE=2 SV=1;sp|Q9M5P5|RSH3L_ARATH Probable GTP diphosphokinase RSH3, chloroplastic OS=Arabidopsis thaliana GN=RSH3 PE=2 SV=1
response to stress	Lus10015754.g	0.08	0	0	0.05	0.3	1.01	353.73	575.37	11.51	11.56	6.84	5.53	0.09	0	244.76	219.05	XP_018811841.1	PREDICTED: bidirectional sugar transporter N3 [Juglans regia]	GO:0006810(transport);GO:0008643(carbohydrate transport);GO:0010150(leaf senescence);GO:0071470(cellular response to osmotic stress);GO:0015770(sucrose transport)	GO:0016021(integral component of membrane);GO:0016020(membrane);GO:0005887(integral component of plasma membrane);GO:0005886(plasma membrane)	GO:0008515(sucrose transmembrane transporter activity);GO:0051119(sugar transmembrane transporter activity)	K15382|SLC50A, SWEET|http://www.genome.jp/dbget-bin/www_bget?ko:K15382	*	*	sp|Q9FY94|SWT15_ARATH	sp|Q9FY94|SWT15_ARATH Bidirectional sugar transporter SWEET15 OS=Arabidopsis thaliana GN=SWEET15 PE=1 SV=1
response to stress	Lus10015868.g	0.35	0.41	0.73	0.39	0.33	0.55	1.96	2.58	3.13	2.34	2.79	2.49	0.78	0.54	2.05	2.12	XP_002320725.2	Ku80 family protein [Populus trichocarpa]	GO:0071480(cellular response to gamma radiation);GO:0006974(cellular response to DNA damage stimulus);GO:0006310(DNA recombination);GO:0006281(DNA repair);GO:0071481(cellular response to X-ray);GO:0000723(telomere maintenance);GO:0006303(double-strand break repair via nonhomologous end joining);GO:0032508(DNA duplex unwinding);GO:0006302(double-strand break repair)	GO:0043564(Ku70:Ku80 complex);GO:0000784(nuclear chromosome, telomeric region);GO:0005634(nucleus)	GO:0004003(ATP-dependent DNA helicase activity);GO:0003677(DNA binding);GO:0005524(ATP binding);GO:0003690(double-stranded DNA binding);GO:0004386(helicase activity);GO:0042162(telomeric DNA binding);GO:0000166(nucleotide binding);GO:0016817(hydrolase activity, acting on acid anhydrides);GO:0016787(hydrolase activity);GO:0003684(damaged DNA binding)	K10885|XRCC5, KU80, G22P2|http://www.genome.jp/dbget-bin/www_bget?ko:K10885	ko03450(Non-homologous end-joining)	KOG2326(L)(DNA-binding subunit of a DNA-dependent protein kinase (Ku80 autoantigen))	sp|Q9FQ09|KU80_ARATH	sp|Q9FQ09|KU80_ARATH ATP-dependent DNA helicase 2 subunit KU80 OS=Arabidopsis thaliana GN=KU80 PE=1 SV=1
response to stress	Lus10015896.g	4.24	5.93	9.78	7.46	26.54	20.79	27.1	28.7	23.32	20.63	17.16	16.58	23.37	20.19	24.02	25.61	OAY23201.1	hypothetical protein MANES_18G060000 [Manihot esculenta]	GO:0006950(response to stress)	*	*	*	*	*	sp|Q8L4N1|PHO34_ARATH;sp|Q8LGG8|USPAL_ARATH	sp|Q8L4N1|PHO34_ARATH Universal stress protein PHOS34 OS=Arabidopsis thaliana GN=PHOS34 PE=1 SV=1;sp|Q8LGG8|USPAL_ARATH Universal stress protein A-like protein OS=Arabidopsis thaliana GN=At3g01520 PE=1 SV=2
response to stress	Lus10015968.g	2.39	4.48	5.65	3.43	3.98	4.47	8.3	10.5	11.6	11.64	9.86	8.47	4.33	4.59	10.21	8.82	XP_018850217.1	PREDICTED: E3 SUMO-protein ligase MMS21 [Juglans regia]	GO:0000724(double-strand break repair via homologous recombination);GO:0080038(positive regulation of cytokinin-activated signaling pathway);GO:0045931(positive regulation of mitotic cell cycle);GO:0016925(protein sumoylation);GO:0006974(cellular response to DNA damage stimulus);GO:0008284(positive regulation of cell proliferation);GO:0010082(regulation of root meristem growth);GO:0032876(negativ…	GO:0030915(Smc5-Smc6 complex);GO:0005634(nucleus);GO:0005737(cytoplasm)	GO:0008270(zinc ion binding);GO:0019789(SUMO transferase activity);GO:0046872(metal ion binding);GO:0016874(ligase activity);GO:0005515(protein binding)	*	*	*	sp|Q8GYH7|NSE2_ARATH	sp|Q8GYH7|NSE2_ARATH E3 SUMO-protein ligase MMS21 OS=Arabidopsis thaliana GN=MMS21 PE=1 SV=1
response to stress	Lus10016031.g	2.47	1.8	1.94	2.23	5.76	6.47	6.19	7.29	5.74	4.89	4.5	4.96	5.98	4.06	6.66	8.05	XP_002306988.2	Glutamate receptor 3.3 precursor family protein [Populus trichocarpa]	GO:0006810(transport);GO:0007186(G-protein coupled receptor signaling pathway);GO:0006811(ion transport);GO:0070588(calcium ion transmembrane transport);GO:0009611(response to wounding);GO:0045087(innate immune response);GO:0050832(defense response to fungus);GO:0071230(cellular response to amino acid stimulus);GO:0009864(induced systemic resistance, jasmonic acid mediated signaling pathway);GO:0…	GO:0016021(integral component of membrane);GO:0016020(membrane)	GO:0004970(ionotropic glutamate receptor activity);GO:0004930(G-protein coupled receptor activity);GO:0008066(glutamate receptor activity);GO:0005262(calcium channel activity)	K05387|GRIP|http://www.genome.jp/dbget-bin/www_bget?ko:K05387	*	KOG1052(PET)(Glutamate-gated kainate-type ion channel receptor subunit GluR5 and related subunits)	sp|Q9C8E7|GLR33_ARATH	sp|Q9C8E7|GLR33_ARATH Glutamate receptor 3.3 OS=Arabidopsis thaliana GN=GLR3.3 PE=2 SV=1
response to stress	Lus10016273.g	31.48	29.09	44.31	48.54	24.82	28.4	292.87	186.99	413.16	539.54	445.22	670.99	25.86	16.6	160.97	157.28	AFN53709.1	hypothetical protein [Linum usitatissimum]	GO:0009790(embryo development);GO:0006970(response to osmotic stress);GO:0009409(response to cold);GO:0048316(seed development);GO:0009414(response to water deprivation)	GO:0005829(cytosol)	*	*	*	*	sp|Q01417|PM1_SOYBN	sp|Q01417|PM1_SOYBN 18 kDa seed maturation protein OS=Glycine max GN=GMPM1 PE=2 SV=1
response to stress	Lus10016316.g	0	0	0.02	0.01	0	0	0.58	0.2	0.19	0.34	0.15	0.12	0.07	0.02	0.51	0.35	XP_002525331.1	PREDICTED: putative disease resistance RPP13-like protein 1 [Ricinus communis]	GO:0006952(defense response);GO:0007165(signal transduction)	*	GO:0004721(phosphoprotein phosphatase activity);GO:0043531(ADP binding);GO:0016787(hydrolase activity)	*	*	*	sp|Q7XA42|RGA1_SOLBU	sp|Q7XA42|RGA1_SOLBU Putative disease resistance protein RGA1 OS=Solanum bulbocastanum GN=RGA1 PE=2 SV=2
response to stress	Lus10016354.g	7.96	9.28	7.82	9.8	10.89	10.8	24.28	33.73	26.82	25.82	28.38	27.11	8.23	13.1	28.23	26.93	XP_002513092.1	PREDICTED: xanthoxin dehydrogenase [Ricinus communis]	GO:0055114(oxidation-reduction process);GO:0009408(response to heat);GO:0009750(response to fructose);GO:0009688(abscisic acid biosynthetic process);GO:0010115(regulation of abscisic acid biosynthetic process);GO:0006561(proline biosynthetic process);GO:0009414(response to water deprivation)	GO:0005829(cytosol)	GO:0004316(3-oxoacyl-[acyl-carrier-protein] reductase (NADPH) activity);GO:0016491(oxidoreductase activity);GO:0004022(alcohol dehydrogenase (NAD) activity);GO:0010301(xanthoxin dehydrogenase activity)	K09841|ABA2|http://www.genome.jp/dbget-bin/www_bget?ko:K09841	ko00906(Carotenoid biosynthesis)	KOG0725(R)(Reductases with broad range of substrate specificities)	sp|Q9C826|ABA2_ARATH	sp|Q9C826|ABA2_ARATH Xanthoxin dehydrogenase OS=Arabidopsis thaliana GN=ABA2 PE=1 SV=1
response to stress	Lus10016643.g	2.29	2.24	1.41	1.77	1.74	1.56	8	2.18	4.35	7.02	4.55	6.68	2.46	1.53	5.56	4.58	XP_018844064.1	PREDICTED: DNA repair protein RAD50 [Juglans regia]	GO:0000723(telomere maintenance);GO:0006281(DNA repair);GO:0090305(nucleic acid phosphodiester bond hydrolysis);GO:0007131(reciprocal meiotic recombination);GO:0000722(telomere maintenance via recombination);GO:0006302(double-strand break repair);GO:0007004(telomere maintenance via telomerase);GO:0016233(telomere capping);GO:0070192(chromosome organization involved in meiotic cell cycle);GO:00063…	GO:0030870(Mre11 complex);GO:0005634(nucleus);GO:0005737(cytoplasm);GO:0035861(site of double-strand break);GO:0000794(condensed nuclear chromosome);GO:0000790(nuclear chromatin);GO:0000784(nuclear chromosome, telomeric region)	GO:0016887(ATPase activity);GO:0004003(ATP-dependent DNA helicase activity);GO:0003691(double-stranded telomeric DNA binding);GO:0043047(single-stranded telomeric DNA binding);GO:0000014(single-stranded DNA endodeoxyribonuclease activity);GO:0004017(adenylate kinase activity);GO:0051880(G-quadruplex DNA binding);GO:0008408(3'-5' exonuclease activity)	K10866|RAD50|http://www.genome.jp/dbget-bin/www_bget?ko:K10866	ko03440(Homologous recombination);ko03450(Non-homologous end-joining)	KOG0962(L)(DNA repair protein RAD50, ABC-type ATPase/SMC superfamily)	sp|Q9SL02|RAD50_ARATH	sp|Q9SL02|RAD50_ARATH DNA repair protein RAD50 OS=Arabidopsis thaliana GN=RAD50 PE=1 SV=2
response to stress	Lus10016644.g	4.03	3.19	5.17	5.01	2.82	6.72	13.33	12.41	16.12	18.18	15.32	15.71	6.49	5.6	17.69	17.91	XP_002300148.1	DNA repair-recombination family protein [Populus trichocarpa]	GO:0090305(nucleic acid phosphodiester bond hydrolysis);GO:0007131(reciprocal meiotic recombination);GO:0000722(telomere maintenance via recombination);GO:0006302(double-strand break repair);GO:0007004(telomere maintenance via telomerase);GO:0006281(DNA repair);GO:0016233(telomere capping);GO:0070192(chromosome organization involved in meiotic cell cycle);GO:0006312(mitotic recombination);GO:0000…	GO:0005737(cytoplasm);GO:0035861(site of double-strand break);GO:0000794(condensed nuclear chromosome);GO:0000790(nuclear chromatin);GO:0030870(Mre11 complex);GO:0000784(nuclear chromosome, telomeric region);GO:0005634(nucleus)	GO:0004003(ATP-dependent DNA helicase activity);GO:0003691(double-stranded telomeric DNA binding);GO:0043047(single-stranded telomeric DNA binding);GO:0000014(single-stranded DNA endodeoxyribonuclease activity);GO:0004017(adenylate kinase activity);GO:0051880(G-quadruplex DNA binding);GO:0008408(3'-5' exonuclease activity);GO:0016887(ATPase activity)	K10866|RAD50|http://www.genome.jp/dbget-bin/www_bget?ko:K10866	ko03440(Homologous recombination);ko03450(Non-homologous end-joining)	KOG0962(L)(DNA repair protein RAD50, ABC-type ATPase/SMC superfamily)	sp|Q9SL02|RAD50_ARATH	sp|Q9SL02|RAD50_ARATH DNA repair protein RAD50 OS=Arabidopsis thaliana GN=RAD50 PE=1 SV=2
response to stress	Lus10016691.g	0.24	0.51	0.49	0.27	0.24	0.29	0.94	0.64	0.95	1.08	1.04	0.75	0.17	0.52	1.47	0.99	XP_011022188.1	PREDICTED: DNA mismatch repair protein MLH3 isoform X5 [Populus euphratica]	GO:0007131(reciprocal meiotic recombination);GO:0006298(mismatch repair)	GO:0032300(mismatch repair complex)	GO:0005524(ATP binding)	K08739|MLH3|http://www.genome.jp/dbget-bin/www_bget?ko:K08739	ko03430(Mismatch repair)	KOG1978(L)(DNA mismatch repair protein - MLH2/PMS1/Pms2 family)	sp|F4JN26|MLH3_ARATH	sp|F4JN26|MLH3_ARATH DNA mismatch repair protein MLH3 OS=Arabidopsis thaliana GN=MLH3 PE=2 SV=2
response to stress	Lus10016859.g	0.06	0.23	2.07	1.25	1.13	0.4	0.82	0.91	1.38	1.43	0.77	0.59	10.72	4.41	6.05	4.35	XP_011014316.1	PREDICTED: G-type lectin S-receptor-like serine/threonine-protein kinase At4g27290 [Populus euphratica]	GO:0016310(phosphorylation);GO:0006952(defense response);GO:0006468(protein phosphorylation);GO:0048544(recognition of pollen)	GO:0005886(plasma membrane);GO:0016020(membrane);GO:0016021(integral component of membrane);GO:0009506(plasmodesma)	GO:0004672(protein kinase activity);GO:0004674(protein serine/threonine kinase activity);GO:0016301(kinase activity);GO:0016740(transferase activity);GO:0005524(ATP binding);GO:0000166(nucleotide binding)	*	*	*	sp|O81832|Y4729_ARATH;sp|O81833|SD11_ARATH	sp|O81832|Y4729_ARATH G-type lectin S-receptor-like serine/threonine-protein kinase At4g27290 OS=Arabidopsis thaliana GN=At4g27290 PE=3 SV=4;sp|O81833|SD11_ARATH G-type lectin S-receptor-like serine/threonine-protein kinase SD1-1 OS=Arabidopsis thaliana GN=SD11 PE=1 SV=1
response to stress	Lus10016860.g	0.62	0.76	3.21	1.23	4.04	1.03	3.43	2.01	2.12	2.63	1.23	1.12	8.13	4.86	5.92	5.01	KDP38995.1	hypothetical protein JCGZ_00752 [Jatropha curcas]	GO:0016310(phosphorylation);GO:0006952(defense response);GO:0006468(protein phosphorylation);GO:0048544(recognition of pollen)	GO:0005886(plasma membrane);GO:0016020(membrane);GO:0016021(integral component of membrane);GO:0009506(plasmodesma)	GO:0004672(protein kinase activity);GO:0004674(protein serine/threonine kinase activity);GO:0016301(kinase activity);GO:0016740(transferase activity);GO:0005524(ATP binding);GO:0000166(nucleotide binding)	*	*	*	sp|O81905|SD18_ARATH	sp|O81905|SD18_ARATH Receptor-like serine/threonine-protein kinase SD1-8 OS=Arabidopsis thaliana GN=SD18 PE=1 SV=1
response to stress	Lus10016871.g	0.04	0.53	0.61	0.02	2.2	0.32	2.75	2.56	1.01	0.78	0.75	0.52	5.51	2.15	4.15	3.13	XP_011014316.1	PREDICTED: G-type lectin S-receptor-like serine/threonine-protein kinase At4g27290 [Populus euphratica]	GO:0016310(phosphorylation);GO:0006952(defense response);GO:0006468(protein phosphorylation);GO:0048544(recognition of pollen)	GO:0005886(plasma membrane);GO:0016020(membrane);GO:0016021(integral component of membrane);GO:0009506(plasmodesma)	GO:0004672(protein kinase activity);GO:0004674(protein serine/threonine kinase activity);GO:0016301(kinase activity);GO:0016740(transferase activity);GO:0005524(ATP binding);GO:0000166(nucleotide binding)	*	*	*	sp|O81905|SD18_ARATH;sp|Q9S972|SD16_ARATH	sp|O81905|SD18_ARATH Receptor-like serine/threonine-protein kinase SD1-8 OS=Arabidopsis thaliana GN=SD18 PE=1 SV=1;sp|Q9S972|SD16_ARATH Receptor-like serine/threonine-protein kinase SD1-6 OS=Arabidopsis thaliana GN=SD16 PE=1 SV=2
response to stress	Lus10016960.g	5.97	8.81	15.72	18.09	60.05	54.02	31.34	20.04	7.63	9.99	8.21	8.74	72.09	54.51	29.38	23.29	XP_012074337.1	PREDICTED: protein YLS9-like [Jatropha curcas]	GO:0006952(defense response)	GO:0016021(integral component of membrane);GO:0016020(membrane);GO:0046658(anchored component of plasma membrane);GO:0009506(plasmodesma)	GO:0004871(signal transducer activity)	*	*	*	sp|Q9SRN0|NHL1_ARATH	sp|Q9SRN0|NHL1_ARATH NDR1/HIN1-like protein 1 OS=Arabidopsis thaliana GN=NHL1 PE=2 SV=1
response to stress	Lus10017093.g	1.36	0.91	1.16	1.28	1.43	2.36	5.51	4.88	2.58	4.56	2.17	2.73	1.35	1.71	2.85	2.41	XP_016205542.1	PREDICTED: putative protease Do-like 14 [Arachis ipaensis]	GO:0006508(proteolysis);GO:0034605(cellular response to heat);GO:0051603(proteolysis involved in cellular protein catabolic process)	GO:0005576(extracellular region);GO:0005739(mitochondrion)	GO:0004252(serine-type endopeptidase activity);GO:0008233(peptidase activity);GO:0008236(serine-type peptidase activity);GO:0016787(hydrolase activity)	K08669|HTRA2, PRSS25|http://www.genome.jp/dbget-bin/www_bget?ko:K08669	*	KOG1320(O)(Serine protease)	sp|Q3E6S8|DGP14_ARATH	sp|Q3E6S8|DGP14_ARATH Putative protease Do-like 14 OS=Arabidopsis thaliana GN=DEGP14 PE=3 SV=2
response to stress	Lus10017724.g	0.54	0.52	0.46	0.52	0.95	1.03	2.66	1.8	1.67	2.16	1.47	1.99	0.92	0.87	1.73	2.33	XP_012076663.1	PREDICTED: DNA mismatch repair protein MSH7 [Jatropha curcas]	GO:0006298(mismatch repair);GO:0045910(negative regulation of DNA recombination);GO:0007131(reciprocal meiotic recombination);GO:0000710(meiotic mismatch repair);GO:0043570(maintenance of DNA repeat elements);GO:0009411(response to UV)	GO:0032301(MutSalpha complex);GO:0000228(nuclear chromosome)	GO:0030983(mismatched DNA binding);GO:0005524(ATP binding);GO:0032137(guanine/thymine mispair binding);GO:0000400(four-way junction DNA binding);GO:0003684(damaged DNA binding);GO:0032138(single base insertion or deletion binding)	K08737|MSH6|http://www.genome.jp/dbget-bin/www_bget?ko:K08737	ko03430(Mismatch repair)	KOG0217(L)(Mismatch repair ATPase MSH6 (MutS family))	sp|Q9SMV7|MSH7_ARATH	sp|Q9SMV7|MSH7_ARATH DNA mismatch repair protein MSH7 OS=Arabidopsis thaliana GN=MSH7 PE=1 SV=1
response to stress	Lus10017977.g	0.25	0.14	0	0.34	1.24	2.96	26.89	18.88	2.85	4.42	1.76	1.7	2.45	0.46	22.98	7	XP_016539780.1	PREDICTED: late embryogenesis abundant protein [Capsicum annuum]	GO:0006950(response to stress);GO:0009737(response to abscisic acid);GO:0009631(cold acclimation);GO:0009415(response to water);GO:0009414(response to water deprivation)	GO:0005829(cytosol)	*	*	*	*	sp|Q96261|DHLEA_ARATH	sp|Q96261|DHLEA_ARATH Probable dehydrin LEA OS=Arabidopsis thaliana GN=LEA PE=2 SV=1
response to stress	Lus10018382.g	5.49	5.75	13.52	6.39	8.73	5.5	22.72	22.27	14.73	16.88	15.64	12.7	26.07	10.66	25.08	24.87	KDO75602.1	hypothetical protein CISIN_1g006155mg [Citrus sinensis]	GO:0006468(protein phosphorylation);GO:0042742(defense response to bacterium)	GO:0005886(plasma membrane);GO:0016020(membrane);GO:0016021(integral component of membrane);GO:0009506(plasmodesma)	GO:0004672(protein kinase activity);GO:0004674(protein serine/threonine kinase activity);GO:0005524(ATP binding)	*	*	*	sp|Q8GYA4|CRK10_ARATH	sp|Q8GYA4|CRK10_ARATH Cysteine-rich receptor-like protein kinase 10 OS=Arabidopsis thaliana GN=CRK10 PE=1 SV=3
response to stress	Lus10018405.g	0.13	0.45	0.69	0.93	1.47	1.05	1.61	1.86	1.26	1.51	2.66	2.24	2.96	3.51	3.11	1.36	XP_002518601.1	PREDICTED: receptor-like serine/threonine-protein kinase SD1-8 [Ricinus communis]	GO:0016310(phosphorylation);GO:0048544(recognition of pollen);GO:0006468(protein phosphorylation);GO:0006952(defense response)	GO:0016021(integral component of membrane);GO:0016020(membrane);GO:0005886(plasma membrane);GO:0009506(plasmodesma)	GO:0004672(protein kinase activity);GO:0005524(ATP binding);GO:0004674(protein serine/threonine kinase activity);GO:0016301(kinase activity);GO:0016740(transferase activity);GO:0000166(nucleotide binding);GO:0031625(ubiquitin protein ligase binding)	*	*	*	sp|O81905|SD18_ARATH	sp|O81905|SD18_ARATH Receptor-like serine/threonine-protein kinase SD1-8 OS=Arabidopsis thaliana GN=SD18 PE=1 SV=1
response to stress	Lus10018515.g	13.88	18.26	24.09	17.06	38.1	36.4	49.13	59.34	43.1	34.8	43.21	40.93	43.54	40.14	57.75	60.1	OAY35267.1	hypothetical protein MANES_12G086000 [Manihot esculenta]	GO:0006950(response to stress)	*	*	*	*	*	sp|Q8L4N1|PHO34_ARATH	sp|Q8L4N1|PHO34_ARATH Universal stress protein PHOS34 OS=Arabidopsis thaliana GN=PHOS34 PE=1 SV=1
response to stress	Lus10018873.g	40.2	35.34	31.22	32.76	330.74	360.58	11370.6	12389.3	5354.6	5087.44	3052.76	2787.97	122.59	75.89	7450.5	4621.54	XP_002985428.1	hypothetical protein SELMODRAFT_446260 [Selaginella moellendorffii]	GO:0006886(intracellular protein transport);GO:0006950(response to stress)	GO:0005622(intracellular)	*	*	*	*	sp|P18899|DDR48_YEAST	sp|P18899|DDR48_YEAST Stress protein DDR48 OS=Saccharomyces cerevisiae (strain ATCC 204508 / S288c) GN=DDR48 PE=1 SV=4
response to stress	Lus10018937.g	0.6	0.62	1.25	0.62	1.42	2.32	2.89	2.66	3.1	2.55	1.97	2.59	2.76	1.99	4.13	4.32	XP_002525518.1	PREDICTED: disease resistance protein RPM1 [Ricinus communis]	GO:0006952(defense response)	*	GO:0004721(phosphoprotein phosphatase activity);GO:0043531(ADP binding);GO:0016787(hydrolase activity)	K13457|RPM1, RPS3|http://www.genome.jp/dbget-bin/www_bget?ko:K13457	ko04626(Plant-pathogen interaction)	*	sp|Q39214|RPM1_ARATH	sp|Q39214|RPM1_ARATH Disease resistance protein RPM1 OS=Arabidopsis thaliana GN=RPM1 PE=1 SV=1
response to stress	Lus10018989.g	0.99	0.95	1.7	1.07	4.9	5.68	8.32	7.06	2.86	3.57	2.95	3.62	5.28	4.59	7.07	5.6	XP_002307194.2	Na+/H+ antiporter family protein [Populus trichocarpa]	GO:0006810(transport);GO:0006885(regulation of pH);GO:0055075(potassium ion homeostasis);GO:0006814(sodium ion transport);GO:0055085(transmembrane transport);GO:0006811(ion transport);GO:0009651(response to salt stress);GO:0006812(cation transport)	GO:0005886(plasma membrane);GO:0016020(membrane);GO:0016021(integral component of membrane);GO:0005774(vacuolar membrane)	GO:0015299(solute:proton antiporter activity);GO:0015385(sodium:proton antiporter activity);GO:0015297(antiporter activity)	*	*	KOG1966(P)(Sodium/hydrogen exchanger protein)	sp|Q56XP4|NHX2_ARATH	sp|Q56XP4|NHX2_ARATH Sodium/hydrogen exchanger 2 OS=Arabidopsis thaliana GN=NHX2 PE=2 SV=2
response to stress	Lus10019214.g	2.94	3.55	6.07	6.08	2.22	6.24	6.72	5.16	8.04	9.62	18.92	18	3.56	3.26	11.35	13.22	XP_010999714.1	PREDICTED: protein SUPPRESSOR OF GENE SILENCING 3 [Populus euphratica]	GO:0010267(production of ta-siRNAs involved in RNA interference);GO:0010050(vegetative phase change);GO:0031047(gene silencing by RNA);GO:0051607(defense response to virus);GO:0010025(wax biosynthetic process);GO:0090502(RNA phosphodiester bond hydrolysis, endonucleolytic);GO:0009616(virus induced gene silencing)	GO:0005737(cytoplasm);GO:0005829(cytosol);GO:0005655(nucleolar ribonuclease P complex);GO:0005783(endoplasmic reticulum)	GO:0004526(ribonuclease P activity)	*	*	*	sp|Q9LDX1|SGS3_ARATH	sp|Q9LDX1|SGS3_ARATH Protein SUPPRESSOR OF GENE SILENCING 3 OS=Arabidopsis thaliana GN=SGS3 PE=1 SV=1
response to stress	Lus10019227.g	22.49	32.34	25.66	25.86	61.61	68.63	185.7	181.1	121.29	106.3	81.7	61.53	35.8	93.71	127.27	120.64	XP_015879652.1	PREDICTED: defensin-like protein 1 [Ziziphus jujuba]	GO:0031640(killing of cells of other organism);GO:0006952(defense response);GO:0050832(defense response to fungus)	*	*	*	*	*	sp|Q9ZUL7|DEF01_ARATH	sp|Q9ZUL7|DEF01_ARATH Defensin-like protein 1 OS=Arabidopsis thaliana GN=PDF2.3 PE=2 SV=1
response to stress	Lus10019348.g	6.91	10.29	16.77	10.91	41.57	33.26	73.36	50.29	45.69	42.6	53.38	41.61	86.35	85.58	101.03	71.64	XP_006425894.1	hypothetical protein CICLE_v10026058mg [Citrus clementina]	GO:0006355(regulation of transcription, DNA-templated);GO:0006310(DNA recombination);GO:0006302(double-strand break repair);GO:0045892(negative regulation of transcription, DNA-templated)	GO:0005634(nucleus)	GO:0003677(DNA binding);GO:0003700(transcription factor activity, sequence-specific DNA binding);GO:0043565(sequence-specific DNA binding)	K09419|HSFF|http://www.genome.jp/dbget-bin/www_bget?ko:K09419	*	KOG0627(K)(Heat shock transcription factor)	sp|P22335|HSF24_SOLPE	sp|P22335|HSF24_SOLPE Heat shock factor protein HSF24 OS=Solanum peruvianum GN=HSF24 PE=2 SV=1
response to stress	Lus10019367.g	1.4	2.98	4.34	7.7	5.22	9.22	11.77	25.82	17.24	16	24.54	12.8	10.49	8.03	18.58	15.6	XP_004138972.1	PREDICTED: uncharacterized protein LOC101217348 [Cucumis sativus]	GO:0009269(response to desiccation);GO:0009735(response to cytokinin)	GO:0005886(plasma membrane);GO:0005829(cytosol);GO:0016020(membrane);GO:0009506(plasmodesma);GO:0005794(Golgi apparatus)	*	*	*	*	*	*
response to stress	Lus10019415.g	13.59	10.58	15.06	10.33	116.65	149.99	58.47	75.78	28.04	31.3	24.73	30.1	69.65	42.94	64.62	50.13	OAY31691.1	hypothetical protein MANES_14G132600 [Manihot esculenta]	GO:0016036(cellular response to phosphate starvation)	GO:0005783(endoplasmic reticulum);GO:0005634(nucleus)	*	*	*	KOG1161(P)(Protein involved in vacuolar polyphosphate accumulation, contains SPX domain);KOG1162(U)(Predicted small molecule transporter)	sp|O48781|SPX2_ARATH;sp|Q69XJ0|SPX1_ORYSJ	sp|O48781|SPX2_ARATH SPX domain-containing protein 2 OS=Arabidopsis thaliana GN=SPX2 PE=2 SV=1;sp|Q69XJ0|SPX1_ORYSJ SPX domain-containing protein 1 OS=Oryza sativa subsp. japonica GN=SPX1 PE=1 SV=1
response to stress	Lus10019539.g	0	0	0	0	0.04	0	1.3	1.84	0.4	0.13	0.24	0.14	0.07	0	1.56	0.47	KDP37595.1	hypothetical protein JCGZ_07941 [Jatropha curcas]	GO:0006471(protein ADP-ribosylation);GO:0055114(oxidation-reduction process);GO:0051103(DNA ligation involved in DNA repair);GO:0006273(lagging strand elongation)	GO:0005737(cytoplasm)	GO:0016740(transferase activity);GO:0016491(oxidoreductase activity);GO:0016757(transferase activity, transferring glycosyl groups);GO:0003950(NAD+ ADP-ribosyltransferase activity);GO:0003910(DNA ligase (ATP) activity)	K10798|PARP|http://www.genome.jp/dbget-bin/www_bget?ko:K10798	ko03410(Base excision repair)	KOG1037(KLO)(NAD+ ADP-ribosyltransferase Parp, required for poly-ADP ribosylation of nuclear proteins)	sp|Q9SWB4|PARP3_SOYBN	sp|Q9SWB4|PARP3_SOYBN Poly [ADP-ribose] polymerase 3 OS=Glycine max GN=PARP3 PE=2 SV=1
response to stress	Lus10019636.g	0.85	0.75	0.67	0.52	2.28	3.02	4.96	2.88	3.78	4.6	2.09	3.25	1.75	1.49	5.05	4.08	XP_015576760.1	PREDICTED: protein DECREASED SIZE EXCLUSION LIMIT 1 isoform X2 [Ricinus communis]	GO:0072718(response to cisplatin);GO:0009790(embryo development);GO:2000280(regulation of root development);GO:0009793(embryo development ending in seed dormancy);GO:0048481(plant ovule development);GO:0006974(cellular response to DNA damage stimulus);GO:0071158(positive regulation of cell cycle arrest);GO:0048700(acquisition of desiccation tolerance in seed);GO:0010497(plasmodesmata-mediated int…	GO:0005737(cytoplasm);GO:0005634(nucleus)	*	*	*	KOG0322(R)(G-protein beta subunit-like protein GNB1L, contains WD repeats)	sp|Q3MV14|DSE1_ARATH	sp|Q3MV14|DSE1_ARATH Protein DECREASED SIZE EXCLUSION LIMIT 1 OS=Arabidopsis thaliana GN=DSE1 PE=1 SV=1
response to stress	Lus10019847.g	2.66	4.39	5.8	4.25	17.6	14.22	14.56	20.29	19.66	22.04	13.03	15.74	20.91	17.28	14.49	18.74	XP_002313121.1	Thioredoxin M-type 3 family protein [Populus trichocarpa]	GO:0055114(oxidation-reduction process);GO:0043085(positive regulation of catalytic activity);GO:0045454(cell redox homeostasis);GO:0000103(sulfate assimilation);GO:0006457(protein folding);GO:0034599(cellular response to oxidative stress);GO:0006662(glycerol ether metabolic process)	GO:0009507(chloroplast)	GO:0016671(oxidoreductase activity, acting on a sulfur group of donors, disulfide as acceptor);GO:0008047(enzyme activator activity);GO:0015035(protein disulfide oxidoreductase activity)	K03671|trxA|http://www.genome.jp/dbget-bin/www_bget?ko:K03671	*	KOG0910(O)(Thioredoxin-like protein)	sp|Q9SEU7|TRXM3_ARATH	sp|Q9SEU7|TRXM3_ARATH Thioredoxin M3, chloroplastic OS=Arabidopsis thaliana GN=GAT1 PE=2 SV=2
response to stress	Lus10019995.g	8.44	10.98	11.09	10.54	26.84	20.58	45.73	43.5	29.19	30.05	19.58	21.75	23.1	17.45	28.16	29.29	XP_002526219.1	PREDICTED: 26S proteasome regulatory subunit 4 homolog B [Ricinus communis]	GO:0030163(protein catabolic process);GO:0006508(proteolysis);GO:0045899(positive regulation of RNA polymerase II transcriptional preinitiation complex assembly);GO:0030433(ubiquitin-dependent ERAD pathway)	GO:0005737(cytoplasm);GO:0031595(nuclear proteasome complex);GO:0031597(cytosolic proteasome complex);GO:0008540(proteasome regulatory particle, base subcomplex)	GO:0008233(peptidase activity);GO:0005524(ATP binding);GO:0000166(nucleotide binding);GO:0008568(microtubule-severing ATPase activity);GO:0016787(hydrolase activity);GO:0017025(TBP-class protein binding);GO:0036402(proteasome-activating ATPase activity)	K03062|PSMC1, RPT2|http://www.genome.jp/dbget-bin/www_bget?ko:K03062	ko03050(Proteasome)	KOG0727(O)(26S proteasome regulatory complex, ATPase RPT3)	sp|Q9SL67|PRS4B_ARATH;sp|Q9SZD4|PRS4A_ARATH	sp|Q9SL67|PRS4B_ARATH 26S proteasome regulatory subunit 4 homolog B OS=Arabidopsis thaliana GN=RPT2B PE=1 SV=1;sp|Q9SZD4|PRS4A_ARATH 26S proteasome regulatory subunit 4 homolog A OS=Arabidopsis thaliana GN=RPT2A PE=1 SV=1
response to stress	Lus10020045.g	64.16	70.28	121.41	126.76	77.68	117.23	404.6	465.1	428.27	489.66	725.02	676.88	95.24	113.1	544.1	685.13	XP_010052841.1	PREDICTED: peroxidase 42 [Eucalyptus grandis]	GO:0042744(hydrogen peroxide catabolic process);GO:0055114(oxidation-reduction process);GO:0009664(plant-type cell wall organization);GO:0006979(response to oxidative stress)	GO:0005576(extracellular region);GO:0009505(plant-type cell wall)	GO:0020037(heme binding);GO:0046872(metal ion binding);GO:0016491(oxidoreductase activity);GO:0004601(peroxidase activity)	K00430|E1.11.1.7|http://www.genome.jp/dbget-bin/www_bget?ko:K00430	ko00940(Phenylpropanoid biosynthesis)	*	sp|Q9SB81|PER42_ARATH	sp|Q9SB81|PER42_ARATH Peroxidase 42 OS=Arabidopsis thaliana GN=PER42 PE=1 SV=2
response to stress	Lus10020051.g	2.52	1.86	3.26	3.29	0.44	0.91	8.03	6.08	12.94	14.68	15.01	13.2	1.75	0.37	14.16	13.66	EEF43981.1	Negative regulator of the PHO system, putative [Ricinus communis]	GO:0016310(phosphorylation);GO:0048544(recognition of pollen);GO:0006952(defense response);GO:0006468(protein phosphorylation);GO:0000462(maturation of SSU-rRNA from tricistronic rRNA transcript (SSU-rRNA, 5.8S rRNA, LSU-rRNA))	GO:0005886(plasma membrane);GO:0016021(integral component of membrane);GO:0016020(membrane);GO:0009506(plasmodesma);GO:0005730(nucleolus);GO:0032040(small-subunit processome);GO:0034388(Pwp2p-containing subcomplex of 90S preribosome)	GO:0004672(protein kinase activity);GO:0005524(ATP binding);GO:0004674(protein serine/threonine kinase activity);GO:0016301(kinase activity);GO:0016740(transferase activity);GO:0030246(carbohydrate binding);GO:0000166(nucleotide binding);GO:0030515(snoRNA binding)	K14556|DIP2, UTP12, WDR3|http://www.genome.jp/dbget-bin/www_bget?ko:K14556	ko03008(Ribosome biogenesis in eukaryotes)	*	sp|Q9LPZ3|Y1141_ARATH	sp|Q9LPZ3|Y1141_ARATH G-type lectin S-receptor-like serine/threonine-protein kinase At1g11410 OS=Arabidopsis thaliana GN=At1g11410 PE=3 SV=3
response to stress	Lus10020070.g	7.99	12.61	26.73	18.71	38.92	8.05	26.83	20.28	37.54	43.16	13.1	27.72	23.69	36.66	29.37	19.69	XP_002304983.1	Thioredoxin-like 4 family protein [Populus trichocarpa]	GO:0045454(cell redox homeostasis);GO:0000103(sulfate assimilation);GO:0006457(protein folding);GO:0034599(cellular response to oxidative stress);GO:0055114(oxidation-reduction process);GO:0006662(glycerol ether metabolic process)	GO:0005886(plasma membrane);GO:0005829(cytosol)	GO:0016671(oxidoreductase activity, acting on a sulfur group of donors, disulfide as acceptor);GO:0015035(protein disulfide oxidoreductase activity)	K03671|trxA|http://www.genome.jp/dbget-bin/www_bget?ko:K03671	*	KOG0908(O)(Thioredoxin-like protein)	sp|Q8LDI5|CXXS1_ARATH	sp|Q8LDI5|CXXS1_ARATH Thioredoxin-like protein CXXS1 OS=Arabidopsis thaliana GN=CXXS1 PE=2 SV=2
response to stress	Lus10020185.g	0.45	0.14	0.22	0.17	0.67	0.48	1.68	1.79	0.94	1.66	0.55	0.6	0.49	0.54	1.23	1.03	XP_018505436.1	PREDICTED: U-box domain-containing protein 35-like [Pyrus x bretschneideri]	GO:0016310(phosphorylation);GO:0006950(response to stress);GO:0006468(protein phosphorylation)	GO:0005886(plasma membrane)	GO:0004672(protein kinase activity);GO:0016301(kinase activity);GO:0005524(ATP binding);GO:0016787(hydrolase activity);GO:0016740(transferase activity);GO:0004715(non-membrane spanning protein tyrosine kinase activity)	K17609|NXN|http://www.genome.jp/dbget-bin/www_bget?ko:K17609	*	*	sp|Q8S8S7|PUB34_ARATH	sp|Q8S8S7|PUB34_ARATH U-box domain-containing protein 34 OS=Arabidopsis thaliana GN=PUB34 PE=3 SV=1
response to stress	Lus10020254.g	15.45	19.8	15.2	17.81	17.94	13.97	66.44	60.42	35.7	45.19	19.57	19.05	19.82	20.82	50.88	47.79	XP_011034328.1	PREDICTED: thioredoxin-like 1-1, chloroplastic [Populus euphratica]	GO:0045454(cell redox homeostasis);GO:0006662(glycerol ether metabolic process);GO:0000103(sulfate assimilation);GO:0006457(protein folding);GO:0034599(cellular response to oxidative stress);GO:0055114(oxidation-reduction process)	GO:0009507(chloroplast)	GO:0015035(protein disulfide oxidoreductase activity);GO:0016671(oxidoreductase activity, acting on a sulfur group of donors, disulfide as acceptor)	*	*	KOG0907(O)(Thioredoxin)	sp|O64654|TRL11_ARATH	sp|O64654|TRL11_ARATH Thioredoxin-like 1-1, chloroplastic OS=Arabidopsis thaliana GN=At1g08570 PE=2 SV=1
response to stress	Lus10020369.g	1.86	2.82	2.14	1.51	1.15	0.89	3.35	2.77	6.87	6.45	5.51	7.59	1.27	0.68	2.45	3.67	XP_002528010.2	PREDICTED: protein arginine N-methyltransferase 1.5 [Ricinus communis]	GO:0006479(protein methylation);GO:0019918(peptidyl-arginine methylation, to symmetrical-dimethyl arginine);GO:0032259(methylation);GO:0035246(peptidyl-arginine N-methylation);GO:0006355(regulation of transcription, DNA-templated);GO:0009909(regulation of flower development);GO:0010220(positive regulation of vernalization response)	GO:0005829(cytosol);GO:0005634(nucleus)	GO:0016740(transferase activity);GO:0008168(methyltransferase activity);GO:0008469(histone-arginine N-methyltransferase activity);GO:0008276(protein methyltransferase activity)	K02516|PRMT5, HSL7|http://www.genome.jp/dbget-bin/www_bget?ko:K02516	ko03013(RNA transport)	KOG0822(D)(Protein kinase inhibitor)	sp|Q8GWT4|ANM15_ARATH	sp|Q8GWT4|ANM15_ARATH Protein arginine N-methyltransferase 1.5 OS=Arabidopsis thaliana GN=PMRT15 PE=1 SV=2
response to stress	Lus10020468.g	3.24	3.22	3.2	3.11	4.11	5.62	11.37	14.6	10.95	8.72	7.47	6.97	4.13	4.52	8.29	8.74	XP_012074567.1	PREDICTED: fatty acid amide hydrolase [Jatropha curcas]	GO:0070291(N-acylethanolamine metabolic process);GO:0042742(defense response to bacterium)	GO:0005886(plasma membrane);GO:0005773(vacuole);GO:0005783(endoplasmic reticulum);GO:0005774(vacuolar membrane);GO:0005794(Golgi apparatus);GO:0016020(membrane);GO:0016021(integral component of membrane)	GO:0016884(carbon-nitrogen ligase activity, with glutamine as amido-N-donor);GO:0016740(transferase activity);GO:0004040(amidase activity);GO:0016787(hydrolase activity);GO:0047412(N-(long-chain-acyl)ethanolamine deacylase activity)	*	*	KOG1211(J)(Amidases)	sp|Q7XJJ7|FAAH_ARATH	sp|Q7XJJ7|FAAH_ARATH Fatty acid amide hydrolase OS=Arabidopsis thaliana GN=FAAH PE=1 SV=1
response to stress	Lus10020862.g	0.87	0.56	0.42	0.4	0.69	0.53	1.56	1.39	2.46	2.49	1.37	1.57	0.47	0.44	1.03	1.37	XP_012086374.1	PREDICTED: DNA polymerase delta catalytic subunit [Jatropha curcas]	GO:0006260(DNA replication);GO:0045004(DNA replication proofreading);GO:0006287(base-excision repair, gap-filling);GO:0006297(nucleotide-excision repair, DNA gap filling)	GO:0043625(delta DNA polymerase complex)	GO:0003677(DNA binding);GO:0016740(transferase activity);GO:0003887(DNA-directed DNA polymerase activity);GO:0008408(3'-5' exonuclease activity);GO:0000166(nucleotide binding);GO:0003676(nucleic acid binding);GO:0016779(nucleotidyltransferase activity);GO:0008296(3'-5'-exodeoxyribonuclease activity)	K02327|POLD1|http://www.genome.jp/dbget-bin/www_bget?ko:K02327	ko03410(Base excision repair);ko03030(DNA replication);ko03440(Homologous recombination);ko03430(Mismatch repair);ko03420(Nucleotide excision repair);ko00230(Purine metabolism);ko00240(Pyrimidine metabolism)	KOG0969(L)(DNA polymerase delta, catalytic subunit)	sp|Q9LRE6|DPOD1_ORYSJ;sp|O48901|DPOD1_SOYBN	sp|Q9LRE6|DPOD1_ORYSJ DNA polymerase delta catalytic subunit OS=Oryza sativa subsp. japonica GN=POLD1 PE=2 SV=1;sp|O48901|DPOD1_SOYBN DNA polymerase delta catalytic subunit OS=Glycine max GN=POLD1 PE=2 SV=1
response to stress	Lus10020878.g	4.95	5.24	1.62	3.21	6.92	4.73	9.94	9.56	4.06	2.94	2.36	2.38	6.66	5.75	10.54	8.73	XP_015580130.1	PREDICTED: cryptochrome DASH, chloroplastic/mitochondrial [Ricinus communis]	GO:0006281(DNA repair)	*	GO:0003913(DNA photolyase activity)	K01669|phrB|http://www.genome.jp/dbget-bin/www_bget?ko:K01669	*	KOG0133(LT)(Deoxyribodipyrimidine photolyase/cryptochrome)	sp|Q84KJ5|CRYD_ARATH	sp|Q84KJ5|CRYD_ARATH Cryptochrome DASH, chloroplastic/mitochondrial OS=Arabidopsis thaliana GN=CRYD PE=1 SV=2
response to stress	Lus10021012.g	1.61	1.42	5.74	1.94	2.76	1.9	3.79	3.68	5.84	6.76	6.11	6.51	5.91	4.09	3.7	3.98	XP_011005655.1	PREDICTED: extra-large guanine nucleotide-binding protein 1-like [Populus euphratica]	GO:0007186(G-protein coupled receptor signaling pathway);GO:0007165(signal transduction);GO:0042742(defense response to bacterium)	GO:0005634(nucleus)	GO:0003924(GTPase activity);GO:0019001(guanyl nucleotide binding);GO:0031683(G-protein beta/gamma-subunit complex binding);GO:0004871(signal transducer activity);GO:0000166(nucleotide binding);GO:0005525(GTP binding)	*	*	KOG0082(DT)(G-protein alpha subunit (small G protein superfamily))	sp|O80462|XLG1_ARATH	sp|O80462|XLG1_ARATH Extra-large guanine nucleotide-binding protein 1 OS=Arabidopsis thaliana GN=XLG1 PE=1 SV=2
response to stress	Lus10021013.g	1.01	1.09	3.82	1.36	1.7	0.81	3.94	0	4.49	5.16	4.31	4.99	3.35	1.04	1.11	0.84	XP_017970534.1	PREDICTED: extra-large guanine nucleotide-binding protein 1 isoform X1 [Theobroma cacao]	GO:0007186(G-protein coupled receptor signaling pathway);GO:0007165(signal transduction);GO:0042742(defense response to bacterium)	GO:0005634(nucleus)	GO:0003924(GTPase activity);GO:0019001(guanyl nucleotide binding);GO:0031683(G-protein beta/gamma-subunit complex binding);GO:0004871(signal transducer activity);GO:0000166(nucleotide binding);GO:0005525(GTP binding)	*	*	*	sp|O80462|XLG1_ARATH	sp|O80462|XLG1_ARATH Extra-large guanine nucleotide-binding protein 1 OS=Arabidopsis thaliana GN=XLG1 PE=1 SV=2
response to stress	Lus10021104.g	199.3	208.73	364.84	265.44	691.32	826.39	1161.32	1126	595.14	617.3	670.85	701.6	955.33	666.47	1125.96	1043.89	EOY07363.1	Adenine nucleotide alpha hydrolases-like superfamily protein isoform 1 [Theobroma cacao]	GO:0006950(response to stress)	GO:0005886(plasma membrane);GO:0009506(plasmodesma)	*	*	*	*	sp|Q8VYN9|PHO32_ARATH;sp|P87132|YFK5_SCHPO	sp|Q8VYN9|PHO32_ARATH Universal stress protein PHOS32 OS=Arabidopsis thaliana GN=PHOS32 PE=1 SV=1;sp|P87132|YFK5_SCHPO Uncharacterized protein C167.05 OS=Schizosaccharomyces pombe (strain 972 / ATCC 24843) GN=SPAC167.05 PE=1 SV=2
response to stress	Lus10021220.g	2.04	1.53	2.57	1.03	2.65	3.67	4.21	4.55	6.84	4.08	3.97	5.47	3.54	3.05	6.72	5.43	XP_012075784.1	PREDICTED: DNA repair protein XRCC4 [Jatropha curcas]	GO:0006310(DNA recombination);GO:0006302(double-strand break repair)	GO:0005634(nucleus)	GO:0003677(DNA binding)	K10886|XRCC4|http://www.genome.jp/dbget-bin/www_bget?ko:K10886	ko03450(Non-homologous end-joining)	*	sp|Q682V0|XRCC4_ARATH	sp|Q682V0|XRCC4_ARATH DNA repair protein XRCC4 OS=Arabidopsis thaliana GN=XRCC4 PE=1 SV=2
response to stress	Lus10021240.g	4.32	2.73	12.63	2.69	37.08	49.38	948.26	1561.24	166.25	183.87	39.81	47.92	21.59	25.22	467.84	187.82	XP_018470684.1	PREDICTED: dehydrin ERD14-like [Raphanus sativus]	GO:0006950(response to stress);GO:0009415(response to water)	*	*	*	*	*	sp|P42763|ERD14_ARATH;sp|P42759|ERD10_ARATH	sp|P42763|ERD14_ARATH Dehydrin ERD14 OS=Arabidopsis thaliana GN=ERD14 PE=1 SV=1;sp|P42759|ERD10_ARATH Dehydrin ERD10 OS=Arabidopsis thaliana GN=ERD10 PE=1 SV=1
response to stress	Lus10021585.g	2.15	2.03	2.64	2.19	1.8	2.29	10.91	8.72	9.71	9.5	11.33	11.89	2.53	1.4	8.56	8.29	XP_002514123.2	PREDICTED: LOW QUALITY PROTEIN: DNA repair protein recA homolog 3, mitochondrial [Ricinus communis]	GO:0006259(DNA metabolic process);GO:0006974(cellular response to DNA damage stimulus);GO:0006310(DNA recombination);GO:0006281(DNA repair);GO:0006312(mitotic recombination);GO:0042148(strand invasion);GO:0000730(DNA recombinase assembly);GO:0010212(response to ionizing radiation)	*	GO:0008094(DNA-dependent ATPase activity);GO:0003677(DNA binding);GO:0003697(single-stranded DNA binding);GO:0005524(ATP binding);GO:0004520(endodeoxyribonuclease activity);GO:0003690(double-stranded DNA binding);GO:0000150(recombinase activity);GO:0000400(four-way junction DNA binding);GO:0000166(nucleotide binding)	K03553|recA|http://www.genome.jp/dbget-bin/www_bget?ko:K03553	ko03440(Homologous recombination)	*	sp|Q9ZUP2|RECA3_ARATH	sp|Q9ZUP2|RECA3_ARATH DNA repair protein recA homolog 3, mitochondrial OS=Arabidopsis thaliana GN=At2g19490 PE=2 SV=2
response to stress	Lus10021650.g	0.39	0.33	0.57	0.45	0.77	0.71	2.28	2.62	2.89	2.68	1.61	2.16	0.65	0.52	2.19	1.99	XP_011040863.1	PREDICTED: SWR1-complex protein 4-like [Populus euphratica]	GO:0045892(negative regulation of transcription, DNA-templated);GO:0043968(histone H2A acetylation);GO:0006281(DNA repair);GO:0006338(chromatin remodeling);GO:0043967(histone H4 acetylation);GO:0032259(methylation)	GO:0035267(NuA4 histone acetyltransferase complex);GO:0000812(Swr1 complex);GO:0005634(nucleus)	GO:0003677(DNA binding);GO:0003714(transcription corepressor activity);GO:0016740(transferase activity);GO:0008168(methyltransferase activity)	K11324|DMAP1, SWC4, EAF2|http://www.genome.jp/dbget-bin/www_bget?ko:K11324	*	KOG2656(BK)(DNA methyltransferase 1-associated protein-1)	sp|Q8VZL6|SWC4_ARATH	sp|Q8VZL6|SWC4_ARATH SWR1-complex protein 4 OS=Arabidopsis thaliana GN=SWC4 PE=1 SV=1
response to stress	Lus10021768.g	1.1	6.17	3.36	4.64	27.07	9.74	51.11	9.69	7.83	11.73	7.68	5.59	22.94	7.56	13.19	6.14	XP_012071716.1	PREDICTED: probable disease resistance protein At4g33300 [Jatropha curcas]	GO:0006952(defense response)	*	GO:0043531(ADP binding)	*	*	*	sp|Q9SZA7|DRL29_ARATH	sp|Q9SZA7|DRL29_ARATH Probable disease resistance protein At4g33300 OS=Arabidopsis thaliana GN=At4g33300 PE=2 SV=3
response to stress	Lus10021769.g	1.47	1.98	3.99	2.14	8.88	6.14	16.99	7.6	5.69	8.59	6.02	4.71	16.65	7.65	11.52	8.36	OAY50882.1	hypothetical protein MANES_05G169600 [Manihot esculenta]	GO:0006952(defense response)	*	GO:0043531(ADP binding)	*	*	*	sp|Q9SZA7|DRL29_ARATH	sp|Q9SZA7|DRL29_ARATH Probable disease resistance protein At4g33300 OS=Arabidopsis thaliana GN=At4g33300 PE=2 SV=3
response to stress	Lus10021827.g	34.96	43.05	75.32	46.94	65.89	87.69	234.25	276.18	120.86	123.29	93.63	103.42	70.43	62.77	217.72	145.7	ACB41781.1	dehydrin [Rhododendron catawbiense]	GO:0006950(response to stress);GO:0009415(response to water);GO:0009737(response to abscisic acid);GO:0009631(cold acclimation);GO:0009414(response to water deprivation);GO:0009739(response to gibberellin);GO:0009269(response to desiccation);GO:0009409(response to cold)	GO:0005829(cytosol);GO:0016020(membrane);GO:0005886(plasma membrane);GO:0009507(chloroplast);GO:0005794(Golgi apparatus);GO:0005634(nucleus)	GO:0005509(calcium ion binding)	*	*	*	sp|P42763|ERD14_ARATH	sp|P42763|ERD14_ARATH Dehydrin ERD14 OS=Arabidopsis thaliana GN=ERD14 PE=1 SV=1
response to stress	Lus10021940.g	28.81	29.55	31.28	37.93	71.05	53.29	168.45	178.37	193.87	227.3	157.82	135.51	45.8	68.21	186.28	164.83	EEF45324.1	Dual specificity protein phosphatase, putative [Ricinus communis]	GO:0006470(protein dephosphorylation);GO:0016311(dephosphorylation);GO:0043407(negative regulation of MAP kinase activity);GO:0000188(inactivation of MAPK activity);GO:0034051(negative regulation of plant-type hypersensitive response);GO:0006979(response to oxidative stress);GO:0034599(cellular response to oxidative stress);GO:0010193(response to ozone)	GO:0005737(cytoplasm);GO:0005886(plasma membrane);GO:0005634(nucleus)	GO:0016791(phosphatase activity);GO:0008138(protein tyrosine/serine/threonine phosphatase activity);GO:0033549(MAP kinase phosphatase activity)	K05766|SSH|http://www.genome.jp/dbget-bin/www_bget?ko:K05766	*	KOG1717(V)(Dual specificity phosphatase)	sp|Q9ZR37|DUS1_ARATH	sp|Q9ZR37|DUS1_ARATH Dual specificity protein phosphatase 1 OS=Arabidopsis thaliana GN=DSPTP1 PE=1 SV=1
response to stress	Lus10022265.g	3.55	3.61	4.05	4.11	10.63	11.26	22.97	26.73	11.48	11.99	10.2	10.22	9.68	11.88	20.94	15.52	OAY52000.1	hypothetical protein MANES_04G049600 [Manihot esculenta]	GO:0016310(phosphorylation);GO:0006468(protein phosphorylation);GO:0009814(defense response, incompatible interaction);GO:0000165(MAPK cascade);GO:0000187(activation of MAPK activity)	GO:0005737(cytoplasm)	GO:0004672(protein kinase activity);GO:0005524(ATP binding);GO:0004674(protein serine/threonine kinase activity);GO:0016301(kinase activity);GO:0016740(transferase activity);GO:0000166(nucleotide binding);GO:0004708(MAP kinase kinase activity);GO:0004707(MAP kinase activity);GO:0004702(signal transducer, downstream of receptor, with serine/threonine kinase activity)	K20607|MKK3|http://www.genome.jp/dbget-bin/www_bget?ko:K20607	ko04016(MAPK signaling pathway - plant)	KOG0581(T)(Mitogen-activated protein kinase kinase (MAP2K))	sp|O80396|M2K3_ARATH	sp|O80396|M2K3_ARATH Mitogen-activated protein kinase kinase 3 OS=Arabidopsis thaliana GN=MKK3 PE=1 SV=1
response to stress	Lus10022349.g	3.77	3.95	9.56	10.98	27.35	28.76	67.36	161.55	29.37	25.55	39.83	38.17	13.89	54.21	41.56	37.1	NP_001310658.1	triacylglycerol lipase 2 precursor [Ricinus communis]	GO:0016042(lipid catabolic process);GO:0006629(lipid metabolic process);GO:0002213(defense response to insect)	GO:0016020(membrane);GO:0016021(integral component of membrane)	GO:0016788(hydrolase activity, acting on ester bonds);GO:0016787(hydrolase activity);GO:0016298(lipase activity)	*	*	KOG2624(I)(Triglyceride lipase-cholesterol esterase)	sp|Q67ZU1|LIP2_ARATH	sp|Q67ZU1|LIP2_ARATH Triacylglycerol lipase 2 OS=Arabidopsis thaliana GN=LIP2 PE=2 SV=1
response to stress	Lus10022351.g	4.7	3.45	1.26	1.18	3.04	11.74	2.12	1.62	6.11	9.81	4.03	4.09	2.32	3.23	3.72	3.77	XP_002526758.1	PREDICTED: putative disease resistance protein RGA4 [Ricinus communis]	GO:0006952(defense response)	*	GO:0004721(phosphoprotein phosphatase activity);GO:0043531(ADP binding);GO:0016787(hydrolase activity)	*	*	*	sp|Q7XA40|RGA3_SOLBU	sp|Q7XA40|RGA3_SOLBU Putative disease resistance protein RGA3 OS=Solanum bulbocastanum GN=RGA3 PE=2 SV=2
response to stress	Lus10022440.g	0.88	0.47	0.44	0.23	0.9	0.74	0.75	1.44	1.49	1	1.94	1.16	0.65	1.25	1.42	1.54	XP_012090654.1	PREDICTED: recQ-mediated genome instability protein 1 [Jatropha curcas]	GO:0000724(double-strand break repair via homologous recombination);GO:0007126(meiotic cell cycle)	*	GO:0000166(nucleotide binding)	K10990|RMI1, BRAP75|http://www.genome.jp/dbget-bin/www_bget?ko:K10990	*	KOG3683(S)(Uncharacterized conserved protein)	sp|Q5XUX6|RMI1_ARATH	sp|Q5XUX6|RMI1_ARATH RecQ-mediated genome instability protein 1 OS=Arabidopsis thaliana GN=RMI1 PE=1 SV=1
response to stress	Lus10022494.g	9.29	7.9	13.62	10.85	14.24	11.97	27.95	28.17	23.31	23.06	17.05	17.18	13.17	15.58	18.85	19.82	XP_012069036.1	PREDICTED: protein disulfide-isomerase 5-2 [Jatropha curcas]	GO:0045454(cell redox homeostasis);GO:0034976(response to endoplasmic reticulum stress);GO:0006457(protein folding)	GO:0016020(membrane);GO:0016021(integral component of membrane);GO:0005783(endoplasmic reticulum)	GO:0003756(protein disulfide isomerase activity);GO:0016853(isomerase activity)	K09580|PDIA1, P4HB|http://www.genome.jp/dbget-bin/www_bget?ko:K09580	ko04141(Protein processing in endoplasmic reticulum)	KOG0191(O)(Thioredoxin/protein disulfide isomerase)	sp|Q94F09|PDI52_ARATH	sp|Q94F09|PDI52_ARATH Protein disulfide-isomerase 5-2 OS=Arabidopsis thaliana GN=PDIL5-2 PE=1 SV=1
response to stress	Lus10022650.g	2.35	1.43	1.39	1.88	2.28	2.14	3.94	4.21	6.46	3.76	3.91	5.15	2.92	3.85	4.29	6.1	XP_011046616.1	PREDICTED: F-box protein SKIP23-like [Populus euphratica]	GO:0006310(DNA recombination);GO:0006302(double-strand break repair);GO:0006284(base-excision repair);GO:0006260(DNA replication);GO:0032508(DNA duplex unwinding)	GO:0005737(cytoplasm);GO:0005694(chromosome);GO:0005634(nucleus)	GO:0003677(DNA binding);GO:0009378(four-way junction helicase activity);GO:0043140(ATP-dependent 3'-5' DNA helicase activity)	*	*	*	sp|Q3EBZ2|SKI23_ARATH	sp|Q3EBZ2|SKI23_ARATH F-box protein SKIP23 OS=Arabidopsis thaliana GN=SKIP23 PE=1 SV=1
response to stress	Lus10022895.g	0.22	0	0.03	0.05	0.49	0.39	0.75	0.83	0.35	0.34	0.4	0.19	0.25	0.27	0.49	0.48	XP_012085262.1	PREDICTED: protein BREAST CANCER SUSCEPTIBILITY 1 homolog [Jatropha curcas]	GO:0065004(protein-DNA complex assembly);GO:0048366(leaf development);GO:0042127(regulation of cell proliferation);GO:0045892(negative regulation of transcription, DNA-templated);GO:0006974(cellular response to DNA damage stimulus);GO:0045717(negative regulation of fatty acid biosynthetic process);GO:0035067(negative regulation of histone acetylation);GO:0045944(positive regulation of transcripti…	GO:0070531(BRCA1-A complex);GO:0005886(plasma membrane);GO:0031436(BRCA1-BARD1 complex)	GO:0004842(ubiquitin-protein transferase activity);GO:0008270(zinc ion binding);GO:0046872(metal ion binding)	K10683|BARD1|http://www.genome.jp/dbget-bin/www_bget?ko:K10683	ko03440(Homologous recombination)	*	sp|F4I443|BARD1_ARATH	sp|F4I443|BARD1_ARATH BRCA1-associated RING domain protein 1 OS=Arabidopsis thaliana GN=BARD1 PE=1 SV=1
response to stress	Lus10023140.g	0.91	0.29	0.27	0.2	1.76	0.61	1.65	16.26	6.33	12.53	3.85	5.15	0.15	1.22	0.47	1.15	OAY35817.1	hypothetical protein MANES_12G132900 [Manihot esculenta]	GO:0098542(defense response to other organism);GO:0044550(secondary metabolite biosynthetic process);GO:0055114(oxidation-reduction process)	GO:0016021(integral component of membrane);GO:0016020(membrane)	GO:0004497(monooxygenase activity);GO:0016709(oxidoreductase activity, acting on paired donors, with incorporation or reduction of molecular oxygen, NAD(P)H as one donor, and incorporation of one atom of oxygen);GO:0005506(iron ion binding);GO:0016705(oxidoreductase activity, acting on paired donors, with incorporation or reduction of molecular oxygen);GO:0016491(oxidoreductase activity);GO:00200…	K13029|CYP71E1|http://www.genome.jp/dbget-bin/www_bget?ko:K13029	ko00460(Cyanoamino acid metabolism)	*	sp|Q6XQ14|C71E7_MANES	sp|Q6XQ14|C71E7_MANES 2-methylbutanal oxime monooxygenase OS=Manihot esculenta GN=CYP71E7 PE=1 SV=1
response to stress	Lus10023302.g	1.81	1.46	4.09	2.57	70.05	68.33	14.54	12.1	7.12	6.35	6.41	5.32	69.27	55.94	22.2	16.03	XP_002519658.1	PREDICTED: peroxisomal (S)-2-hydroxy-acid oxidase [Ricinus communis]	GO:0055114(oxidation-reduction process);GO:0050665(hydrogen peroxide biosynthetic process);GO:0009854(oxidative photosynthetic carbon pathway);GO:0042742(defense response to bacterium);GO:0009853(photorespiration);GO:0010204(defense response signaling pathway, resistance gene-independent)	GO:0005829(cytosol);GO:0005777(peroxisome)	GO:0052853(long-chain-(S)-2-hydroxy-long-chain-acid oxidase activity);GO:0052854(medium-chain-(S)-2-hydroxy-acid oxidase activity);GO:0003824(catalytic activity);GO:0010181(FMN binding);GO:0052852(very-long-chain-(S)-2-hydroxy-acid oxidase activity);GO:0016491(oxidoreductase activity);GO:0003973((S)-2-hydroxy-acid oxidase activity);GO:0008891(glycolate oxidase activity)	K11517|HAO|http://www.genome.jp/dbget-bin/www_bget?ko:K11517	ko04146(Peroxisome);ko00630(Glyoxylate and dicarboxylate metabolism);ko01200(Carbon metabolism)	KOG0538(C)(Glycolate oxidase)	sp|Q9LRR9|GLO1_ARATH;sp|O49506|GLO5_ARATH	sp|Q9LRR9|GLO1_ARATH Peroxisomal (S)-2-hydroxy-acid oxidase GLO1 OS=Arabidopsis thaliana GN=GLO1 PE=1 SV=1;sp|O49506|GLO5_ARATH Peroxisomal (S)-2-hydroxy-acid oxidase GLO5 OS=Arabidopsis thaliana GN=GLO5 PE=1 SV=1
response to stress	Lus10023391.g	0.16	0.14	0.67	0.4	0.54	0.27	1.59	1.83	0.5	1.23	1.3	0.95	1.62	0.39	2.65	1.89	XP_002298942.2	hypothetical protein POPTR_0001s43260g, partial [Populus trichocarpa]	GO:0006952(defense response);GO:0006468(protein phosphorylation)	GO:0005886(plasma membrane);GO:0016020(membrane);GO:0016021(integral component of membrane);GO:0009506(plasmodesma)	GO:0004672(protein kinase activity);GO:0004674(protein serine/threonine kinase activity);GO:0005524(ATP binding)	*	*	*	sp|O64793|Y1675_ARATH	sp|O64793|Y1675_ARATH G-type lectin S-receptor-like serine/threonine-protein kinase At1g67520 OS=Arabidopsis thaliana GN=At1g67520 PE=2 SV=3
response to stress	Lus10023427.g	1.27	1.99	1.57	1.54	0.88	1.45	4.15	3.37	4.17	5.98	6.06	6.92	2.11	1.03	3.44	3.58	XP_002315239.2	hypothetical protein POPTR_0010s21550g [Populus trichocarpa]	GO:0002098(tRNA wobble uridine modification);GO:0006351(transcription, DNA-templated);GO:0006355(regulation of transcription, DNA-templated);GO:0031538(negative regulation of anthocyanin metabolic process);GO:0048530(fruit morphogenesis);GO:0035265(organ growth);GO:0008283(cell proliferation);GO:0009787(regulation of abscisic acid-activated signaling pathway);GO:0008284(positive regulation of cel…	GO:0005737(cytoplasm);GO:0033588(Elongator holoenzyme complex);GO:0005634(nucleus);GO:0005829(cytosol)	*	K11373|ELP1, IKI3, IKBKAP|http://www.genome.jp/dbget-bin/www_bget?ko:K11373	*	KOG1920(K)(IkappaB kinase complex, IKAP component)	sp|Q9FNA4|ELP1_ARATH	sp|Q9FNA4|ELP1_ARATH Elongator complex protein 1 OS=Arabidopsis thaliana GN=ELP1 PE=1 SV=1
response to stress	Lus10023672.g	58.88	53.92	57.08	57.27	100.9	88.75	216.52	154.16	98.64	112.33	111.36	112.68	91.65	81.93	186.69	126.58	OAY55393.1	hypothetical protein MANES_03G150200 [Manihot esculenta]	GO:0008152(metabolic process);GO:0006635(fatty acid beta-oxidation);GO:0031408(oxylipin biosynthetic process);GO:0009611(response to wounding);GO:0006629(lipid metabolic process);GO:0009695(jasmonic acid biosynthetic process);GO:0010111(glyoxysome organization);GO:0009789(positive regulation of abscisic acid-activated signaling pathway);GO:0006633(fatty acid biosynthetic process);GO:0006631(fatty…	GO:0005730(nucleolus);GO:0005829(cytosol);GO:0016020(membrane);GO:0009514(glyoxysome);GO:0005739(mitochondrion);GO:0005777(peroxisome);GO:0009507(chloroplast);GO:0005774(vacuolar membrane)	GO:0016747(transferase activity, transferring acyl groups other than amino-acyl groups);GO:0016740(transferase activity);GO:0016746(transferase activity, transferring acyl groups);GO:0003824(catalytic activity);GO:0003988(acetyl-CoA C-acyltransferase activity)	K07513|ACAA1|http://www.genome.jp/dbget-bin/www_bget?ko:K07513	ko04146(Peroxisome);ko00280(Valine, leucine and isoleucine degradation);ko01040(Biosynthesis of unsaturated fatty acids);ko00071(Fatty acid degradation);ko00592(alpha-Linolenic acid metabolism);ko01212(Fatty acid metabolism)	KOG1390(I)(Acetyl-CoA acetyltransferase)	sp|Q56WD9|THIK2_ARATH	sp|Q56WD9|THIK2_ARATH 3-ketoacyl-CoA thiolase 2, peroxisomal OS=Arabidopsis thaliana GN=PED1 PE=1 SV=2
response to stress	Lus10023694.g	3.13	3.73	4.2	3.59	8.87	7.53	15.21	11.4	10.58	13.17	11.48	11.61	8.58	6.54	16.11	11.88	OAY28185.1	hypothetical protein MANES_15G048200 [Manihot esculenta]	GO:0006281(DNA repair);GO:0071139(resolution of recombination intermediates);GO:0009908(flower development);GO:0048826(cotyledon morphogenesis);GO:0048316(seed development);GO:0051781(positive regulation of cell division);GO:0010091(trichome branching);GO:0009965(leaf morphogenesis);GO:0006355(regulation of transcription, DNA-templated)	GO:0030915(Smc5-Smc6 complex);GO:0005829(cytosol);GO:0005634(nucleus)	*	*	*	*	*	*
response to stress	Lus10023805.g	0.55	0.8	0.08	0.1	0.72	0.51	2.03	1.4	2.31	1.63	1	1.11	0.72	0.66	1.1	0.98	XP_012070498.1	PREDICTED: replication protein A 70 kDa DNA-binding subunit E [Jatropha curcas]	GO:0006310(DNA recombination);GO:0006281(DNA repair);GO:0006260(DNA replication)	GO:0005634(nucleus)	GO:0003677(DNA binding);GO:0003676(nucleic acid binding);GO:0008270(zinc ion binding);GO:0046872(metal ion binding)	K07466|RFA1, RPA1, rpa|http://www.genome.jp/dbget-bin/www_bget?ko:K07466	ko03030(DNA replication);ko03440(Homologous recombination);ko03430(Mismatch repair);ko03420(Nucleotide excision repair)	KOG4400(O)(E3 ubiquitin ligase interacting with arginine methyltransferase)	sp|Q9FHJ6|RFA1C_ARATH	sp|Q9FHJ6|RFA1C_ARATH Replication protein A 70 kDa DNA-binding subunit C OS=Arabidopsis thaliana GN=RPA1C PE=3 SV=1
response to stress	Lus10023832.g	2.21	2.87	0.94	1.88	0.8	1.32	2.13	2.86	3.92	4.63	4.01	6.7	1.07	0.95	1.58	1.98	XP_012069337.1	PREDICTED: long chain acyl-CoA synthetase 2 [Jatropha curcas]	GO:0008152(metabolic process);GO:0010311(lateral root formation);GO:0010143(cutin biosynthetic process);GO:0050832(defense response to fungus)	GO:0005783(endoplasmic reticulum);GO:0009506(plasmodesma)	GO:0003824(catalytic activity);GO:0004467(long-chain fatty acid-CoA ligase activity);GO:0031957(very long-chain fatty acid-CoA ligase activity)	K01897|ACSL, fadD|http://www.genome.jp/dbget-bin/www_bget?ko:K01897	ko04146(Peroxisome);ko00061(Fatty acid biosynthesis);ko00071(Fatty acid degradation);ko01212(Fatty acid metabolism)	KOG1180(I)(Acyl-CoA synthetase);KOG1256(I)(Long-chain acyl-CoA synthetases (AMP-forming))	sp|Q9XIA9|LACS2_ARATH	sp|Q9XIA9|LACS2_ARATH Long chain acyl-CoA synthetase 2 OS=Arabidopsis thaliana GN=LACS2 PE=2 SV=1
response to stress	Lus10023991.g	0.64	0.55	0.3	0.25	0.32	0.24	1.2	0.5	1.21	1.22	1.02	1.06	0.25	0.18	0.66	0.63	XP_012077694.1	PREDICTED: serine/threonine-protein kinase ATR isoform X1 [Jatropha curcas]	GO:0016310(phosphorylation);GO:0010332(response to gamma radiation);GO:0007004(telomere maintenance via telomerase);GO:0006281(DNA repair);GO:0032204(regulation of telomere maintenance);GO:0010044(response to aluminum ion);GO:0033044(regulation of chromosome organization);GO:0006303(double-strand break repair via nonhomologous end joining);GO:0032504(multicellular organism reproduction);GO:000712…	GO:0009506(plasmodesma);GO:0005634(nucleus)	GO:0004674(protein serine/threonine kinase activity);GO:0016301(kinase activity);GO:0016740(transferase activity);GO:0005524(ATP binding);GO:0000166(nucleotide binding)	K06640|ATR|http://www.genome.jp/dbget-bin/www_bget?ko:K06640	*	KOG0891(L)(DNA-dependent protein kinase)	sp|Q9FKS4|ATR_ARATH	sp|Q9FKS4|ATR_ARATH Serine/threonine-protein kinase ATR OS=Arabidopsis thaliana GN=ATR PE=2 SV=2
response to stress	Lus10024154.g	3.29	3.23	2.86	3.19	9.34	17.33	15.76	17.05	8.94	10.27	6.89	6.13	7.4	7.06	12.79	12.05	XP_011022896.1	PREDICTED: probable leucine-rich repeat receptor-like serine/threonine-protein kinase At5g15730 [Populus euphratica]	GO:0006950(response to stress);GO:0006468(protein phosphorylation)	*	GO:0004672(protein kinase activity);GO:0005524(ATP binding);GO:0004674(protein serine/threonine kinase activity);GO:0000166(nucleotide binding)	K04730|IRAK1|http://www.genome.jp/dbget-bin/www_bget?ko:K04730	*	*	sp|Q9ZUE0|PEK12_ARATH;sp|Q9XI96|PERK7_ARATH	sp|Q9ZUE0|PEK12_ARATH Proline-rich receptor-like protein kinase PERK12 OS=Arabidopsis thaliana GN=PERK12 PE=2 SV=2;sp|Q9XI96|PERK7_ARATH Proline-rich receptor-like protein kinase PERK7 OS=Arabidopsis thaliana GN=PERK7 PE=2 SV=1
response to stress	Lus10024212.g	0.1	0.24	0.29	0.22	0.46	0.48	0.78	0.76	0.23	0.22	0.51	0.49	0.88	0.81	1.32	1.06	XP_010252202.1	PREDICTED: U-box domain-containing protein 35-like isoform X1 [Nelumbo nucifera]	GO:0006950(response to stress);GO:0055114(oxidation-reduction process);GO:0006468(protein phosphorylation)	*	GO:0004672(protein kinase activity);GO:0047134(protein-disulfide reductase activity);GO:0005524(ATP binding)	K17609|NXN|http://www.genome.jp/dbget-bin/www_bget?ko:K17609	*	*	sp|Q8S8S7|PUB34_ARATH	sp|Q8S8S7|PUB34_ARATH U-box domain-containing protein 34 OS=Arabidopsis thaliana GN=PUB34 PE=3 SV=1
response to stress	Lus10024233.g	2.57	1.63	1.58	2.21	9.08	4.75	15.15	7.14	6.51	4.5	4.37	7.52	4.75	5.92	6.3	6.51	OAY31019.1	hypothetical protein MANES_14G077100 [Manihot esculenta]	GO:0055072(iron ion homeostasis);GO:0010106(cellular response to iron ion starvation)	GO:0016020(membrane);GO:0016021(integral component of membrane)	GO:0046983(protein dimerization activity);GO:0003700(transcription factor activity, sequence-specific DNA binding)	*	*	*	sp|Q9SN74|BH047_ARATH	sp|Q9SN74|BH047_ARATH Transcription factor bHLH47 OS=Arabidopsis thaliana GN=BHLH47 PE=1 SV=1
response to stress	Lus10024507.g	0.3	0.64	0.99	2.91	1.21	1.83	6.15	1.45	0.57	4.55	3.07	4.89	13.82	7.47	14.96	11.26	XP_006445862.1	hypothetical protein CICLE_v10017191mg [Citrus clementina]	GO:0006979(response to oxidative stress)	GO:0016020(membrane);GO:0016021(integral component of membrane)	*	*	*	*	*	*
response to stress	Lus10024614.g	3.96	3.89	3.55	3.85	12.09	7.51	84.18	45.84	5.21	7.44	9.05	7.21	13.63	8.03	82.69	44.73	XP_002303512.2	nitrate transporter family protein [Populus trichocarpa]	GO:0006810(transport);GO:0010167(response to nitrate);GO:0015706(nitrate transport);GO:0006857(oligopeptide transport);GO:0009414(response to water deprivation)	GO:0005886(plasma membrane);GO:0016020(membrane);GO:0016021(integral component of membrane)	GO:0005215(transporter activity);GO:0015112(nitrate transmembrane transporter activity)	K14638|SLC15A3_4, PHT|http://www.genome.jp/dbget-bin/www_bget?ko:K14638	*	*	sp|Q05085|PTR7_ARATH;sp|Q9LVE0|PTR33_ARATH	sp|Q05085|PTR7_ARATH Protein NRT1/ PTR FAMILY 6.3 OS=Arabidopsis thaliana GN=NPF6.3 PE=1 SV=1;sp|Q9LVE0|PTR33_ARATH Protein NRT1/ PTR FAMILY 6.4 OS=Arabidopsis thaliana GN=NPF6.4 PE=1 SV=1
response to stress	Lus10025091.g	0.27	0.42	0.19	0.17	0.11	0.09	0.57	0.53	1.04	0.95	0.63	0.6	0.15	0.16	0.47	0.82	XP_012077694.1	PREDICTED: serine/threonine-protein kinase ATR isoform X1 [Jatropha curcas]	GO:0016310(phosphorylation);GO:0010332(response to gamma radiation);GO:0007004(telomere maintenance via telomerase);GO:0006281(DNA repair);GO:0032204(regulation of telomere maintenance);GO:0010044(response to aluminum ion);GO:0033044(regulation of chromosome organization);GO:0006303(double-strand break repair via nonhomologous end joining);GO:0032504(multicellular organism reproduction);GO:000712…	GO:0009506(plasmodesma);GO:0005634(nucleus)	GO:0004674(protein serine/threonine kinase activity);GO:0016301(kinase activity);GO:0016740(transferase activity);GO:0005524(ATP binding);GO:0000166(nucleotide binding)	K06640|ATR|http://www.genome.jp/dbget-bin/www_bget?ko:K06640	*	KOG0891(L)(DNA-dependent protein kinase)	sp|Q9FKS4|ATR_ARATH	sp|Q9FKS4|ATR_ARATH Serine/threonine-protein kinase ATR OS=Arabidopsis thaliana GN=ATR PE=2 SV=2
response to stress	Lus10025253.g	0.38	0.55	2.76	0.29	3.98	0.45	8.24	1.98	0.92	2.69	0.73	0	20.83	4.7	20.55	13.74	OAY41596.1	hypothetical protein MANES_09G114400 [Manihot esculenta]	GO:0006952(defense response)	*	*	*	*	*	sp|Q9LZX1|LOR15_ARATH	sp|Q9LZX1|LOR15_ARATH Protein LURP-one-related 15 OS=Arabidopsis thaliana GN=At5g01750 PE=1 SV=1
response to stress	Lus10025254.g	50.96	53.55	542.55	116.78	1014.59	1192.63	737.04	189.16	139.05	212.42	130.32	81.76	1541.91	906.84	819.3	870.75	XP_002533823.1	PREDICTED: protein LURP-one-related 15 [Ricinus communis]	GO:0006952(defense response)	*	*	*	*	*	sp|Q9LZX1|LOR15_ARATH;sp|Q9ZQR8|LURP1_ARATH	sp|Q9LZX1|LOR15_ARATH Protein LURP-one-related 15 OS=Arabidopsis thaliana GN=At5g01750 PE=1 SV=1;sp|Q9ZQR8|LURP1_ARATH Protein LURP1 OS=Arabidopsis thaliana GN=LURP1 PE=2 SV=1
response to stress	Lus10025512.g	0.33	0.2	0.38	0.24	1.36	0.06	1.6	0.62	1.06	1.14	0.29	0.05	2.74	0.44	1.52	1.92	OAY24641.1	hypothetical protein MANES_17G031800 [Manihot esculenta]	GO:0048544(recognition of pollen);GO:0045087(innate immune response);GO:0006468(protein phosphorylation)	GO:0005886(plasma membrane);GO:0009506(plasmodesma)	GO:0031625(ubiquitin protein ligase binding);GO:0004672(protein kinase activity);GO:0005524(ATP binding);GO:0004674(protein serine/threonine kinase activity)	*	*	*	sp|Q9LPZ3|Y1141_ARATH;sp|Q9ZT07|RKS1_ARATH	sp|Q9LPZ3|Y1141_ARATH G-type lectin S-receptor-like serine/threonine-protein kinase At1g11410 OS=Arabidopsis thaliana GN=At1g11410 PE=3 SV=3;sp|Q9ZT07|RKS1_ARATH G-type lectin S-receptor-like serine/threonine-protein kinase RKS1 OS=Arabidopsis thaliana GN=RKS1 PE=3 SV=3
response to stress	Lus10025575.g	2.64	2.12	3.2	2.74	11.16	5.51	12.55	9.99	8.95	8.37	8.73	7.73	8.12	9.52	11.15	9.29	XP_011026395.1	PREDICTED: endonuclease III homolog 1, chloroplastic isoform X1 [Populus euphratica]	GO:0006285(base-excision repair, AP site formation);GO:0008152(metabolic process);GO:0006974(cellular response to DNA damage stimulus);GO:0006284(base-excision repair);GO:0006281(DNA repair)	GO:0005634(nucleus)	GO:0003677(DNA binding);GO:0019104(DNA N-glycosylase activity);GO:0046872(metal ion binding);GO:0003824(catalytic activity);GO:0003906(DNA-(apurinic or apyrimidinic site) lyase activity);GO:0016829(lyase activity);GO:0051536(iron-sulfur cluster binding);GO:0016798(hydrolase activity, acting on glycosyl bonds);GO:0016787(hydrolase activity);GO:0051539(4 iron, 4 sulfur cluster binding)	K10773|NTH|http://www.genome.jp/dbget-bin/www_bget?ko:K10773	ko03410(Base excision repair)	KOG1921(L)(Endonuclease III)	sp|Q9SIC4|NTH1_ARATH	sp|Q9SIC4|NTH1_ARATH Endonuclease III homolog 1, chloroplastic OS=Arabidopsis thaliana GN=NTH1 PE=2 SV=2
response to stress	Lus10025845.g	14.12	16.5	22.32	18.15	38.03	39.6	77.99	72.82	71.9	54.34	44.76	49.42	50.32	42.61	83.42	73.1	XP_012087579.1	PREDICTED: thioredoxin reductase NTRB-like [Jatropha curcas]	GO:0019430(removal of superoxide radicals);GO:0055114(oxidation-reduction process)	GO:0005737(cytoplasm)	GO:0004791(thioredoxin-disulfide reductase activity);GO:0016491(oxidoreductase activity)	K00384|trxB|http://www.genome.jp/dbget-bin/www_bget?ko:K00384	ko00450(Selenocompound metabolism)	KOG0404(O)(Thioredoxin reductase)	sp|Q39242|TRXB2_ARATH	sp|Q39242|TRXB2_ARATH Thioredoxin reductase 2 OS=Arabidopsis thaliana GN=NTR2 PE=2 SV=2
response to stress	Lus10025983.g	0.77	0.27	0	0.45	0	0	9.4	1.24	7.75	8.4	5.57	11.08	0	0	1.67	0.26	XP_017252838.1	PREDICTED: dehydrin DHN1 [Daucus carota subsp. sativus]	GO:0006950(response to stress);GO:0009415(response to water)	*	*	*	*	*	sp|P25863|XERO1_ARATH	sp|P25863|XERO1_ARATH Dehydrin Xero 1 OS=Arabidopsis thaliana GN=XERO1 PE=2 SV=2
response to stress	Lus10026109.g	0.11	0.15	0.28	0.21	0.29	0.5	0.83	0.46	0.25	0.54	0.39	0.34	0.65	0.26	0.98	0.51	OAY32086.1	hypothetical protein MANES_14G165300 [Manihot esculenta]	GO:0006952(defense response)	*	GO:0043531(ADP binding)	*	*	*	sp|Q9LRR4|R13L1_ARATH	sp|Q9LRR4|R13L1_ARATH Putative disease resistance RPP13-like protein 1 OS=Arabidopsis thaliana GN=RPPL1 PE=3 SV=1
response to stress	Lus10026132.g	1.13	1.24	1.93	1.45	4.82	5.37	5.94	5.82	4.22	3.2	2.7	3.21	4.3	3.2	5.8	4.62	OAY32086.1	hypothetical protein MANES_14G165300 [Manihot esculenta]	GO:0006952(defense response)	*	GO:0043531(ADP binding)	*	*	*	sp|Q9LRR4|R13L1_ARATH	sp|Q9LRR4|R13L1_ARATH Putative disease resistance RPP13-like protein 1 OS=Arabidopsis thaliana GN=RPPL1 PE=3 SV=1
response to stress	Lus10026201.g	0.17	0.25	0.2	0.02	0.8	0.5	0	0	1.87	0.76	0.13	0.21	2.05	1.15	0.43	0.99	XP_011004903.1	PREDICTED: TMV resistance protein N-like isoform X1 [Populus euphratica]	GO:0007165(signal transduction);GO:0006952(defense response)	GO:0016020(membrane);GO:0016021(integral component of membrane)	GO:0043531(ADP binding)	*	*	*	sp|Q40392|TMVRN_NICGU;sp|Q9FI14|TAO1_ARATH;sp|C4B7M7|RPS4W_ARATH;sp|F4J339|RPP1_ARATH	sp|Q40392|TMVRN_NICGU TMV resistance protein N OS=Nicotiana glutinosa GN=N PE=1 SV=1;sp|Q9FI14|TAO1_ARATH Disease resistance protein TAO1 OS=Arabidopsis thaliana GN=TAO1 PE=4 SV=1;sp|C4B7M7|RPS4W_ARATH Disease resistance protein RPS4 OS=Arabidopsis thaliana GN=RPS4 PE=2 SV=1;sp|F4J339|RPP1_ARATH Probable disease resistance protein RPP1 OS=Arabidopsis thaliana GN=RPP1 PE=2 SV=1
response to stress	Lus10026421.g	1.18	1.19	1.31	1.41	2.5	3.8	2.76	4.89	4.18	3.19	3.69	3.82	3.76	3.51	5	5.38	AER92596.1	hypothetical protein [Linum usitatissimum]	GO:0006952(defense response)	GO:0005886(plasma membrane);GO:0016020(membrane);GO:0016021(integral component of membrane)	*	*	*	*	sp|Q8GWL2|LOR7_ARATH	sp|Q8GWL2|LOR7_ARATH Protein LURP-one-related 7 OS=Arabidopsis thaliana GN=At2g30270 PE=2 SV=1
response to stress	Lus10026878.g	66.41	73.2	83.98	114.12	137.6	74.82	1130.14	732.53	618.43	719.59	295.23	349.98	94.18	130.41	888.7	597.81	XP_017627641.1	PREDICTED: thioredoxin-like 1-1, chloroplastic [Gossypium arboreum]	GO:0045454(cell redox homeostasis);GO:0006662(glycerol ether metabolic process);GO:0000103(sulfate assimilation);GO:0006457(protein folding);GO:0034599(cellular response to oxidative stress);GO:0055114(oxidation-reduction process)	GO:0009507(chloroplast);GO:0009570(chloroplast stroma);GO:0009536(plastid);GO:0031969(chloroplast membrane)	GO:0015035(protein disulfide oxidoreductase activity);GO:0016671(oxidoreductase activity, acting on a sulfur group of donors, disulfide as acceptor)	*	*	KOG0907(O)(Thioredoxin)	sp|O64654|TRL11_ARATH;sp|Q10M18|TRL12_ORYSJ	sp|O64654|TRL11_ARATH Thioredoxin-like 1-1, chloroplastic OS=Arabidopsis thaliana GN=At1g08570 PE=2 SV=1;sp|Q10M18|TRL12_ORYSJ Thioredoxin-like 1-2, chloroplastic OS=Oryza sativa subsp. japonica GN=Os03g0326500 PE=2 SV=1
response to stress	Lus10026887.g	202.11	195.97	202.57	183.45	385.94	463.34	812.97	696.45	363.48	396.17	363.62	311.22	441.88	275.31	590.35	682.5	NP_001306722.1	phospholipid hydroperoxide glutathione peroxidase 1, chloroplastic-like [Populus euphratica]	GO:0006979(response to oxidative stress);GO:0055114(oxidation-reduction process)	*	GO:0004602(glutathione peroxidase activity);GO:0016491(oxidoreductase activity);GO:0004601(peroxidase activity)	K00432|gpx|http://www.genome.jp/dbget-bin/www_bget?ko:K00432	ko00590(Arachidonic acid metabolism);ko00480(Glutathione metabolism)	KOG1651(O)(Glutathione peroxidase)	sp|Q9SZ54|GPX7_ARATH	sp|Q9SZ54|GPX7_ARATH Putative glutathione peroxidase 7, chloroplastic OS=Arabidopsis thaliana GN=GPX7 PE=3 SV=2
response to stress	Lus10027021.g	58.47	60.13	63.52	63.79	57.88	42.6	90.48	51.42	47.88	56.72	79.94	67.34	257.11	373.25	277.23	86.19	AKJ66819.1	glutathione peroxidase [Populus euphratica]	GO:0055114(oxidation-reduction process);GO:0006979(response to oxidative stress)	GO:0016020(membrane);GO:0016021(integral component of membrane)	GO:0004602(glutathione peroxidase activity);GO:0016491(oxidoreductase activity);GO:0004601(peroxidase activity)	K00432|gpx|http://www.genome.jp/dbget-bin/www_bget?ko:K00432	ko00590(Arachidonic acid metabolism);ko00480(Glutathione metabolism)	KOG1651(O)(Glutathione peroxidase)	sp|O04922|GPX2_ARATH	sp|O04922|GPX2_ARATH Probable glutathione peroxidase 2 OS=Arabidopsis thaliana GN=GPX2 PE=1 SV=1
response to stress	Lus10027093.g	10.96	10.85	14.05	11.71	23.68	25.32	50.84	43.3	24.85	24.74	18.72	16.51	25.57	23.06	36.68	29.88	EEF29044.1	Protein MLO, putative, partial [Ricinus communis]	GO:0009607(response to biotic stimulus);GO:0006952(defense response)	GO:0016020(membrane);GO:0016021(integral component of membrane);GO:0005886(plasma membrane)	GO:0005516(calmodulin binding)	K08472|MLO|http://www.genome.jp/dbget-bin/www_bget?ko:K08472	*	*	sp|O49621|MLO1_ARATH	sp|O49621|MLO1_ARATH MLO-like protein 1 OS=Arabidopsis thaliana GN=MLO1 PE=1 SV=1
response to stress	Lus10027164.g	1.05	1	0.33	0.71	1.79	3.23	4.68	3.37	0.4	0	0.78	0.68	1.2	0.87	1.08	1.37	OAY35152.1	hypothetical protein MANES_12G076300 [Manihot esculenta]	GO:0009664(plant-type cell wall organization);GO:0042744(hydrogen peroxide catabolic process);GO:0006979(response to oxidative stress);GO:0055114(oxidation-reduction process)	GO:0009505(plant-type cell wall);GO:0005576(extracellular region)	GO:0016491(oxidoreductase activity);GO:0004601(peroxidase activity);GO:0020037(heme binding);GO:0046872(metal ion binding)	K00430|E1.11.1.7|http://www.genome.jp/dbget-bin/www_bget?ko:K00430	ko00940(Phenylpropanoid biosynthesis)	*	sp|O23044|PER3_ARATH	sp|O23044|PER3_ARATH Peroxidase 3 OS=Arabidopsis thaliana GN=PER3 PE=2 SV=1
response to stress	Lus10027186.g	17.46	14.32	28.37	16.63	47.74	55.78	67.03	73.59	44.53	42.85	38.27	40.85	56.37	60.86	70.77	55.55	XP_004487416.1	PREDICTED: autophagy-related protein 8C [Cicer arietinum]	GO:0006914(autophagy);GO:0006995(cellular response to nitrogen starvation)	*	*	K08341|GABARAP, ATG8, LC3|http://www.genome.jp/dbget-bin/www_bget?ko:K08341	ko04136(Autophagy - other eukaryotes)	KOG1654(Z)(Microtubule-associated anchor protein involved in autophagy and membrane trafficking)	sp|Q6Z1D5|ATG8C_ORYSJ	sp|Q6Z1D5|ATG8C_ORYSJ Autophagy-related protein 8C OS=Oryza sativa subsp. japonica GN=ATG8C PE=2 SV=1
response to stress	Lus10027219.g	2.6	2.09	2.78	1.95	3.24	2.92	8.75	7.87	9.11	10.25	9.43	8.74	3.65	3.94	8.55	8.48	OAY48129.1	hypothetical protein MANES_06G133600 [Manihot esculenta]	GO:0006281(DNA repair);GO:0071139(resolution of recombination intermediates);GO:0051276(chromosome organization);GO:0000724(double-strand break repair via homologous recombination)	GO:0030915(Smc5-Smc6 complex);GO:0005694(chromosome)	GO:0005524(ATP binding)	*	*	KOG0979(BDL)(Structural maintenance of chromosome protein SMC5/Spr18, SMC superfamily)	sp|Q9FLR5|SMC6A_ARATH;sp|Q9FII7|SMC6B_ARATH	sp|Q9FLR5|SMC6A_ARATH Structural maintenance of chromosomes protein 6A OS=Arabidopsis thaliana GN=SMC6A PE=2 SV=1;sp|Q9FII7|SMC6B_ARATH Structural maintenance of chromosomes protein 6B OS=Arabidopsis thaliana GN=SMC6B PE=2 SV=1
response to stress	Lus10027405.g	2.69	3.11	0.99	5.92	5.87	5.44	10.92	10.75	1.29	1.01	2.51	2.13	3	3.17	3.14	9.67	XP_016737370.1	PREDICTED: peroxidase 66 [Gossypium hirsutum]	GO:0042744(hydrogen peroxide catabolic process);GO:0006979(response to oxidative stress);GO:0055114(oxidation-reduction process);GO:0009664(plant-type cell wall organization)	GO:0005576(extracellular region);GO:0009505(plant-type cell wall)	GO:0016491(oxidoreductase activity);GO:0004601(peroxidase activity);GO:0020037(heme binding);GO:0046872(metal ion binding)	K00430|E1.11.1.7|http://www.genome.jp/dbget-bin/www_bget?ko:K00430	ko00940(Phenylpropanoid biosynthesis)	*	sp|Q9LT91|PER66_ARATH	sp|Q9LT91|PER66_ARATH Peroxidase 66 OS=Arabidopsis thaliana GN=PER66 PE=2 SV=1
response to stress	Lus10027477.g	11.05	14.14	25.14	19.62	94.27	119.29	76.71	81.29	56.94	56.61	59.91	56.83	106.75	70.54	110.78	70.93	AND01129.1	putative acyl CoA ligase [Linum usitatissimum]	GO:0008152(metabolic process);GO:0010214(seed coat development);GO:0010030(positive regulation of seed germination);GO:0050832(defense response to fungus);GO:0033611(oxalate catabolic process);GO:0009735(response to cytokinin)	GO:0005737(cytoplasm);GO:0048046(apoplast);GO:0009507(chloroplast);GO:0009570(chloroplast stroma);GO:0009506(plasmodesma)	GO:0003824(catalytic activity);GO:0050203(oxalate-CoA ligase activity);GO:0016874(ligase activity)	*	*	KOG1176(I)(Acyl-CoA synthetase)	sp|Q9SMT7|4CLLA_ARATH	sp|Q9SMT7|4CLLA_ARATH Oxalate--CoA ligase OS=Arabidopsis thaliana GN=AAE3 PE=1 SV=1
response to stress	Lus10027517.g	1.58	1.36	1.39	0.74	34.47	11.91	8.64	5.29	0.84	0.25	0.51	0.45	12.85	2.26	1.33	1.21	KJB22185.1	hypothetical protein B456_004G034000 [Gossypium raimondii]	GO:0006950(response to stress);GO:0006457(protein folding)	*	GO:0051082(unfolded protein binding);GO:0005524(ATP binding)	K04079|htpG, HSP90A|http://www.genome.jp/dbget-bin/www_bget?ko:K04079	ko04141(Protein processing in endoplasmic reticulum);ko04626(Plant-pathogen interaction)	KOG0020(O)(Endoplasmic reticulum glucose-regulated protein (GRP94/endoplasmin), HSP90 family)	sp|P36182|HSP82_TOBAC	sp|P36182|HSP82_TOBAC Heat shock protein 82 (Fragment) OS=Nicotiana tabacum GN=HSP82 PE=2 SV=1
response to stress	Lus10027518.g	1.32	1.77	0.97	1.18	48.72	27.78	9.34	13.57	2.11	1.58	2.64	0.71	36.95	14	5.13	4.69	XP_002513649.1	PREDICTED: heat shock protein 83 [Ricinus communis]	GO:0006950(response to stress);GO:0006457(protein folding)	*	GO:0051082(unfolded protein binding);GO:0005524(ATP binding)	K04079|htpG, HSP90A|http://www.genome.jp/dbget-bin/www_bget?ko:K04079	ko04141(Protein processing in endoplasmic reticulum);ko04626(Plant-pathogen interaction)	KOG0020(O)(Endoplasmic reticulum glucose-regulated protein (GRP94/endoplasmin), HSP90 family)	sp|P36182|HSP82_TOBAC	sp|P36182|HSP82_TOBAC Heat shock protein 82 (Fragment) OS=Nicotiana tabacum GN=HSP82 PE=2 SV=1
response to stress	Lus10027634.g	7.33	9.02	8.04	7.18	6.76	6.32	25.71	21.02	29.08	26.23	28.46	30.51	7.67	4.21	15.75	15.61	XP_012065513.1	PREDICTED: chaperone protein dnaJ 1, mitochondrial [Jatropha curcas]	GO:0009408(response to heat);GO:0006457(protein folding);GO:0009558(embryo sac cellularization);GO:0009553(embryo sac development);GO:0000740(nuclear membrane fusion);GO:0010198(synergid death);GO:0010197(polar nucleus fusion);GO:0051085(chaperone mediated protein folding requiring cofactor)	GO:0005737(cytoplasm);GO:0005739(mitochondrion)	GO:0005524(ATP binding);GO:0031072(heat shock protein binding);GO:0051082(unfolded protein binding);GO:0046872(metal ion binding)	K03686|dnaJ|http://www.genome.jp/dbget-bin/www_bget?ko:K03686	*	KOG0712(O)(Molecular chaperone (DnaJ superfamily))	sp|Q8GWW8|GFA2_ARATH	sp|Q8GWW8|GFA2_ARATH Chaperone protein dnaJ GFA2, mitochondrial OS=Arabidopsis thaliana GN=GFA2 PE=2 SV=1
response to stress	Lus10027639.g	10.16	10.4	12.15	9.09	74.39	52.95	62.9	49.35	21.57	31.95	20.27	28.05	53.06	40.62	47.62	31.51	OAY26955.1	hypothetical protein MANES_16G088300 [Manihot esculenta]	GO:0031347(regulation of defense response);GO:2000022(regulation of jasmonic acid mediated signaling pathway);GO:0009611(response to wounding);GO:1903507(negative regulation of nucleic acid-templated transcription)	GO:0005634(nucleus)	GO:0003714(transcription corepressor activity)	K13464|JAZ|http://www.genome.jp/dbget-bin/www_bget?ko:K13464	ko04075(Plant hormone signal transduction)	*	sp|Q9C5K8|TIF3B_ARATH	sp|Q9C5K8|TIF3B_ARATH Protein TIFY 3B OS=Arabidopsis thaliana GN=TIFY3B PE=1 SV=1
response to stress	Lus10027648.g	1.2	0.89	1.01	1.54	5.71	3.73	19.46	5.73	4.07	4.26	1.81	2.2	4.41	3.74	6.3	4.58	ADI39634.1	plastid jasmonates ZIM-domain protein [Hevea brasiliensis]	GO:0031347(regulation of defense response);GO:0009611(response to wounding);GO:2000022(regulation of jasmonic acid mediated signaling pathway);GO:1903507(negative regulation of nucleic acid-templated transcription)	GO:0005634(nucleus)	GO:0003714(transcription corepressor activity)	K13464|JAZ|http://www.genome.jp/dbget-bin/www_bget?ko:K13464	ko04075(Plant hormone signal transduction)	*	sp|Q9S7M2|TI10B_ARATH	sp|Q9S7M2|TI10B_ARATH Protein TIFY 10B OS=Arabidopsis thaliana GN=TIFY10B PE=1 SV=1
response to stress	Lus10028001.g	3.45	2.49	4.93	8.05	0.67	1.94	108.64	38.32	74.58	112.56	58.31	41.15	1.98	0.78	46.63	54.04	XP_002276328.2	PREDICTED: EID1-like F-box protein 3 [Vitis vinifera]	GO:0010228(vegetative to reproductive phase transition of meristem);GO:0009738(abscisic acid-activated signaling pathway);GO:0010029(regulation of seed germination);GO:0009414(response to water deprivation);GO:0006970(response to osmotic stress);GO:0009651(response to salt stress);GO:0009737(response to abscisic acid)	GO:0005634(nucleus)	*	*	*	*	sp|Q93ZT5|EDL3_ARATH	sp|Q93ZT5|EDL3_ARATH EID1-like F-box protein 3 OS=Arabidopsis thaliana GN=EDL3 PE=2 SV=1
response to stress	Lus10028188.g	7.58	9.88	14.06	13.52	18.25	14.92	24.24	28.22	32.61	28.62	29.21	35.04	21.28	18.57	28.75	26.16	KYP72071.1	DnaJ protein isogeny [Cajanus cajan]	GO:0009408(response to heat);GO:0006457(protein folding)	*	GO:0051082(unfolded protein binding);GO:0046872(metal ion binding);GO:0005524(ATP binding);GO:0031072(heat shock protein binding)	K09503|DNAJA2|http://www.genome.jp/dbget-bin/www_bget?ko:K09503	ko04141(Protein processing in endoplasmic reticulum)	KOG0712(O)(Molecular chaperone (DnaJ superfamily))	sp|Q04960|DNJH_CUCSA;sp|P42824|DNJH2_ALLPO	sp|Q04960|DNJH_CUCSA DnaJ protein homolog OS=Cucumis sativus GN=DNAJ1 PE=2 SV=1;sp|P42824|DNJH2_ALLPO DnaJ protein homolog 2 OS=Allium porrum GN=LDJ2 PE=2 SV=1
response to stress	Lus10028232.g	3.26	3.55	5.76	3.77	4.57	5.58	13.27	7.84	7.01	8.02	6.99	5.85	9.42	7.16	12.69	8.86	OAY23126.1	hypothetical protein MANES_18G054100 [Manihot esculenta]	GO:0016310(phosphorylation);GO:0055114(oxidation-reduction process);GO:0006468(protein phosphorylation);GO:0046777(protein autophosphorylation);GO:0006979(response to oxidative stress);GO:0009845(seed germination)	GO:0016021(integral component of membrane);GO:0016020(membrane);GO:0005886(plasma membrane);GO:0070825(micropyle)	GO:0004672(protein kinase activity);GO:0005524(ATP binding);GO:0004674(protein serine/threonine kinase activity);GO:0004714(transmembrane receptor protein tyrosine kinase activity);GO:0032440(2-alkenal reductase [NAD(P)] activity);GO:0016301(kinase activity);GO:0016740(transferase activity);GO:0000166(nucleotide binding);GO:0016491(oxidoreductase activity)	*	*	*	sp|Q9LJM4|IKU2_ARATH	sp|Q9LJM4|IKU2_ARATH Receptor-like protein kinase HAIKU2 OS=Arabidopsis thaliana GN=IKU2 PE=1 SV=1
response to stress	Lus10028275.g	7.55	11.18	29.3	37.29	11.05	3.93	55.58	16.51	7.51	16.67	3.54	5.15	15.49	19.58	49.7	23.88	XP_012087761.1	PREDICTED: nematode resistance protein-like HSPRO2 [Jatropha curcas]	GO:0006952(defense response)	*	*	*	*	*	sp|O04203|HSPR2_ARATH	sp|O04203|HSPR2_ARATH Nematode resistance protein-like HSPRO2 OS=Arabidopsis thaliana GN=HSPRO2 PE=1 SV=1
response to stress	Lus10028385.g	0.6	0.92	0.86	0.38	1.96	3.58	7.89	8.7	4.12	2.8	2.57	1.16	2.68	0.97	6.43	5.03	XP_002521670.1	PREDICTED: putative F-box protein At1g65770 [Ricinus communis]	GO:0006260(DNA replication);GO:0006310(DNA recombination);GO:0006302(double-strand break repair);GO:0006284(base-excision repair);GO:0032508(DNA duplex unwinding)	GO:0005737(cytoplasm);GO:0005694(chromosome);GO:0005634(nucleus)	GO:0003677(DNA binding);GO:0009378(four-way junction helicase activity);GO:0043140(ATP-dependent 3'-5' DNA helicase activity)	*	*	*	sp|Q9SHX9|FB72_ARATH	sp|Q9SHX9|FB72_ARATH Putative F-box protein At1g65770 OS=Arabidopsis thaliana GN=At1g65770 PE=4 SV=1
response to stress	Lus10028567.g	81.75	98.31	135.57	90.98	72.61	90.24	2410.97	3585.72	3013.75	1448.7	630.25	846.1	37.79	43.44	704.85	298.81	XP_002985428.1	hypothetical protein SELMODRAFT_446260 [Selaginella moellendorffii]	GO:0006950(response to stress)	*	*	*	*	*	*	*
response to stress	Lus10028639.g	0.43	0.38	0.58	0.53	1.45	1.56	3.02	3.48	3.49	2.8	1.58	1.93	2.85	1.87	5.17	2.37	XP_002525518.1	PREDICTED: disease resistance protein RPM1 [Ricinus communis]	GO:0006952(defense response)	*	GO:0004721(phosphoprotein phosphatase activity);GO:0043531(ADP binding);GO:0016787(hydrolase activity)	K13457|RPM1, RPS3|http://www.genome.jp/dbget-bin/www_bget?ko:K13457	ko04626(Plant-pathogen interaction)	*	sp|Q39214|RPM1_ARATH	sp|Q39214|RPM1_ARATH Disease resistance protein RPM1 OS=Arabidopsis thaliana GN=RPM1 PE=1 SV=1
response to stress	Lus10028887.g	7.33	14.08	3.49	5.57	26.81	40.01	46.77	23.94	23.03	26.59	1.17	2.45	12.42	11.35	17.72	37.48	XP_012072242.1	PREDICTED: MLP-like protein 328 [Jatropha curcas]	GO:0009607(response to biotic stimulus);GO:0006952(defense response)	*	*	*	*	*	sp|Q9ZVF3|ML328_ARATH	sp|Q9ZVF3|ML328_ARATH MLP-like protein 328 OS=Arabidopsis thaliana GN=MLP328 PE=2 SV=1
response to stress	Lus10028966.g	0.46	0.46	1.08	0.81	0.61	0.97	2.14	2.71	1.77	2.09	1.9	1.29	0.89	0.8	2.4	2.28	EEF31729.1	DNA mismatch repair protein mutS, putative [Ricinus communis]	GO:0045143(homologous chromosome segregation);GO:0007129(synapsis);GO:0010777(meiotic mismatch repair involved in reciprocal meiotic recombination);GO:0006298(mismatch repair)	GO:0000794(condensed nuclear chromosome);GO:0043073(germ cell nucleus);GO:0009506(plasmodesma)	GO:0030983(mismatched DNA binding);GO:0005524(ATP binding)	K08740|MSH4|http://www.genome.jp/dbget-bin/www_bget?ko:K08740	*	KOG0217(L)(Mismatch repair ATPase MSH6 (MutS family))	sp|F4JP48|MSH4_ARATH	sp|F4JP48|MSH4_ARATH DNA mismatch repair protein MSH4 OS=Arabidopsis thaliana GN=MSH4 PE=2 SV=1
response to stress	Lus10029123.g	0.6	0.73	1.85	0.86	3.35	3.53	6.78	4.3	2.93	3.45	5.61	5.31	3.7	4.14	8.27	7.53	OAY34503.1	hypothetical protein MANES_12G025400 [Manihot esculenta]	GO:0016310(phosphorylation);GO:0006952(defense response);GO:0006468(protein phosphorylation)	GO:0005886(plasma membrane);GO:0009506(plasmodesma);GO:0016020(membrane);GO:0016021(integral component of membrane)	GO:0004672(protein kinase activity);GO:0004674(protein serine/threonine kinase activity);GO:0016301(kinase activity);GO:0005524(ATP binding);GO:0000166(nucleotide binding)	*	*	*	sp|Q9CAL3|CRK2_ARATH	sp|Q9CAL3|CRK2_ARATH Cysteine-rich receptor-like protein kinase 2 OS=Arabidopsis thaliana GN=CRK2 PE=2 SV=1
response to stress	Lus10029476.g	0.39	0.43	0.34	0.46	0.36	0.65	2.21	1.42	2.41	2.34	1.99	2.06	0.37	0.63	1.63	1.47	XP_002517770.1	PREDICTED: structural maintenance of chromosomes protein 5 isoform X1 [Ricinus communis]	GO:0006281(DNA repair);GO:0071139(resolution of recombination intermediates);GO:0007062(sister chromatid cohesion);GO:0000724(double-strand break repair via homologous recombination)	GO:0030915(Smc5-Smc6 complex);GO:0009506(plasmodesma)	*	*	*	KOG0979(BDL)(Structural maintenance of chromosome protein SMC5/Spr18, SMC superfamily);KOG0964(D)(Structural maintenance of chromosome protein 3 (sister chromatid cohesion complex Cohesin, subunit SMC3))	sp|Q9LFS8|SMC5_ARATH	sp|Q9LFS8|SMC5_ARATH Structural maintenance of chromosomes protein 5 OS=Arabidopsis thaliana GN=SMC5 PE=2 SV=1
response to stress	Lus10029634.g	33.29	52.3	84.19	78.64	273.75	161.33	264.44	358.25	58.15	52.01	56.67	65.03	291.32	235.39	268.82	277.61	ABF29697.1	late embryogenesis abundant protein 5 [Populus suaveolens]	GO:0006950(response to stress)	*	*	*	*	*	sp|Q93WF6|SAG21_ARATH	sp|Q93WF6|SAG21_ARATH Protein SENESCENCE-ASSOCIATED GENE 21, mitochondrial OS=Arabidopsis thaliana GN=SAG21 PE=2 SV=1
response to stress	Lus10029664.g	2.6	2.21	1.16	1.99	1.54	1.3	3.74	4.37	4.43	2.74	5.03	6.23	0.33	1.51	2.66	1.77	XP_015079825.1	PREDICTED: uncharacterized protein LOC107023599 [Solanum pennellii]	GO:0006950(response to stress)	*	GO:0016787(hydrolase activity)	*	*	*	*	*
response to stress	Lus10029722.g	0.48	0.24	2.03	0.25	5.02	2.85	2.34	2.91	0.78	0.94	0.15	0.16	4.97	2.93	2.8	2.91	XP_015577431.1	PREDICTED: disease resistance protein RML1A isoform X1 [Ricinus communis]	GO:0007165(signal transduction);GO:0006952(defense response)	*	GO:0043531(ADP binding)	*	*	*	sp|F4I594|RLM1A_ARATH;sp|Q40392|TMVRN_NICGU;sp|O48573|LAZ5_ARATH	sp|F4I594|RLM1A_ARATH Disease resistance protein RML1A OS=Arabidopsis thaliana GN=RLM1A PE=4 SV=1;sp|Q40392|TMVRN_NICGU TMV resistance protein N OS=Nicotiana glutinosa GN=N PE=1 SV=1;sp|O48573|LAZ5_ARATH Disease resistance protein LAZ5 OS=Arabidopsis thaliana GN=LAZ5 PE=1 SV=1
response to stress	Lus10029759.g	5.85	6.01	4.18	2.98	21.38	16.42	111.12	85.49	59.21	63.59	43.75	44.82	14.21	9.38	58.94	38.38	XP_002526167.1	PREDICTED: alcohol dehydrogenase 1 [Ricinus communis]	GO:0055114(oxidation-reduction process);GO:0006970(response to osmotic stress)	GO:0005886(plasma membrane);GO:0005829(cytosol)	GO:0051903(S-(hydroxymethyl)glutathione dehydrogenase activity);GO:0016491(oxidoreductase activity);GO:0008270(zinc ion binding);GO:0046872(metal ion binding);GO:0004022(alcohol dehydrogenase (NAD) activity)	K18857|ADH1|http://www.genome.jp/dbget-bin/www_bget?ko:K18857	ko00350(Tyrosine metabolism);ko00010(Glycolysis / Gluconeogenesis);ko00071(Fatty acid degradation);ko00592(alpha-Linolenic acid metabolism)	KOG0022(Q)(Alcohol dehydrogenase, class III)	sp|P48977|ADH_MALDO;sp|P06525|ADH1_ARATH	sp|P48977|ADH_MALDO Alcohol dehydrogenase OS=Malus domestica GN=ADH PE=2 SV=1;sp|P06525|ADH1_ARATH Alcohol dehydrogenase class-P OS=Arabidopsis thaliana GN=ADH1 PE=1 SV=2
response to stress	Lus10029817.g	2.95	3	3.74	3.59	5.16	6.67	6.74	8.49	7.67	6.1	7.81	6.46	7.91	8.94	11.29	10.8	XP_006372477.1	hypothetical protein POPTR_0017s02000g [Populus trichocarpa]	GO:0010150(leaf senescence);GO:0006914(autophagy);GO:0006810(transport);GO:0000045(autophagosome assembly);GO:0000422(mitophagy);GO:0044804(nucleophagy);GO:0042594(response to starvation);GO:0006995(cellular response to nitrogen starvation);GO:0006501(C-terminal protein lipidation)	GO:0005737(cytoplasm);GO:0034274(Atg12-Atg5-Atg16 complex);GO:0034045(pre-autophagosomal structure membrane);GO:0016020(membrane);GO:0016021(integral component of membrane)	GO:0019776(Atg8 ligase activity)	K08339|ATG5|http://www.genome.jp/dbget-bin/www_bget?ko:K08339	ko04136(Autophagy - other eukaryotes)	KOG2976(O)(Protein involved in autophagy and nutrient starvation)	sp|Q9FFI2|ATG5_ARATH	sp|Q9FFI2|ATG5_ARATH Autophagy protein 5 OS=Arabidopsis thaliana GN=ATG5 PE=2 SV=1
response to stress	Lus10029852.g	1.25	1.62	4.95	2.04	4.94	3.44	7.34	5.47	6	5.38	4.58	4.29	11.33	6.04	6.97	8.53	XP_011023753.1	PREDICTED: uncharacterized protein LOC105125143 [Populus euphratica]	GO:0006950(response to stress);GO:0080142(regulation of salicylic acid biosynthetic process);GO:0009697(salicylic acid biosynthetic process);GO:0002229(defense response to oomycetes);GO:0009617(response to bacterium);GO:0071219(cellular response to molecule of bacterial origin);GO:0009789(positive regulation of abscisic acid-activated signaling pathway);GO:0009816(defense response to bacterium, i…	GO:0005634(nucleus)	GO:0005516(calmodulin binding);GO:0043565(sequence-specific DNA binding);GO:0003700(transcription factor activity, sequence-specific DNA binding);GO:0003677(DNA binding)	K09419|HSFF|http://www.genome.jp/dbget-bin/www_bget?ko:K09419	*	*	sp|Q0WVV6|CB60D_ARATH;sp|Q9C635|HSFB4_ARATH;sp|Q9FKL6|CB60B_ARATH	sp|Q0WVV6|CB60D_ARATH Calmodulin-binding protein 60 D OS=Arabidopsis thaliana GN=CBP60D PE=2 SV=1;sp|Q9C635|HSFB4_ARATH Heat stress transcription factor B-4 OS=Arabidopsis thaliana GN=HSFB4 PE=2 SV=1;sp|Q9FKL6|CB60B_ARATH Calmodulin-binding protein 60 B OS=Arabidopsis thaliana GN=CBP60B PE=2 SV=1
response to stress	Lus10029911.g	1.97	1.82	1.7	1.52	1.37	1.32	4.49	4.31	6	4.56	5.02	4.27	2.15	1.69	5.2	4.74	XP_011023612.1	PREDICTED: LOW QUALITY PROTEIN: DNA polymerase zeta catalytic subunit [Populus euphratica]	GO:0019985(translesion synthesis);GO:0006281(DNA repair);GO:0006260(DNA replication);GO:0071494(cellular response to UV-C);GO:0006974(cellular response to DNA damage stimulus);GO:0042276(error-prone translesion synthesis);GO:0009411(response to UV);GO:0010224(response to UV-B)	GO:0016035(zeta DNA polymerase complex);GO:0005634(nucleus)	GO:0003677(DNA binding);GO:0016740(transferase activity);GO:0003676(nucleic acid binding);GO:0003887(DNA-directed DNA polymerase activity);GO:0008408(3'-5' exonuclease activity);GO:0000166(nucleotide binding);GO:0016779(nucleotidyltransferase activity);GO:0046872(metal ion binding);GO:0051536(iron-sulfur cluster binding);GO:0051539(4 iron, 4 sulfur cluster binding)	K02350|POLZ1, rev3|http://www.genome.jp/dbget-bin/www_bget?ko:K02350	*	KOG0969(L)(DNA polymerase delta, catalytic subunit)	sp|Q766Z3|REV3_ARATH	sp|Q766Z3|REV3_ARATH DNA polymerase zeta catalytic subunit OS=Arabidopsis thaliana GN=REV3 PE=2 SV=1
response to stress	Lus10029955.g	1.14	1.49	3.02	1.49	11.94	11.23	27.57	13.17	9.21	12	8.21	6.36	14.4	10.58	19.56	12.93	XP_002274073.1	PREDICTED: acetolactate synthase 1, chloroplastic [Vitis vinifera]	GO:0009099(valine biosynthetic process);GO:0009082(branched-chain amino acid biosynthetic process);GO:0008652(cellular amino acid biosynthetic process);GO:0009097(isoleucine biosynthetic process);GO:0009635(response to herbicide)	GO:0009536(plastid);GO:0009507(chloroplast)	GO:0000287(magnesium ion binding);GO:0050660(flavin adenine dinucleotide binding);GO:0016740(transferase activity);GO:0046872(metal ion binding);GO:0003824(catalytic activity);GO:0003984(acetolactate synthase activity);GO:0030976(thiamine pyrophosphate binding)	K01652|E2.2.1.6L, ilvB, ilvG, ilvI|http://www.genome.jp/dbget-bin/www_bget?ko:K01652	ko00290(Valine, leucine and isoleucine biosynthesis);ko00650(Butanoate metabolism);ko00660(C5-Branched dibasic acid metabolism);ko00770(Pantothenate and CoA biosynthesis);ko01210(2-Oxocarboxylic acid metabolism);ko01230(Biosynthesis of amino acids)	KOG4166(EH)(Thiamine pyrophosphate-requiring enzyme)	sp|P27818|ILVB1_BRANA	sp|P27818|ILVB1_BRANA Acetolactate synthase 1, chloroplastic OS=Brassica napus PE=3 SV=1
response to stress	Lus10030095.g	0.26	0.19	0.5	0.16	1.78	0.71	0.95	2.98	1.15	0.65	0.38	0.66	0.49	0.42	1.79	1.68	XP_002524498.1	PREDICTED: SPX domain-containing protein 1 [Ricinus communis]	GO:0016036(cellular response to phosphate starvation)	GO:0005634(nucleus)	*	*	*	KOG1162(U)(Predicted small molecule transporter)	sp|O48781|SPX2_ARATH	sp|O48781|SPX2_ARATH SPX domain-containing protein 2 OS=Arabidopsis thaliana GN=SPX2 PE=2 SV=1
response to stress	Lus10030251.g	7.25	6.77	11.83	10.14	17.96	20.64	25.77	31.3	20.96	21.56	17.01	15.31	30.59	21.49	36.97	30.87	OAY62161.1	hypothetical protein MANES_01G246300 [Manihot esculenta]	GO:0046854(phosphatidylinositol phosphorylation);GO:0046777(protein autophosphorylation);GO:0009651(response to salt stress)	GO:0005829(cytosol)	GO:0016301(kinase activity);GO:0004674(protein serine/threonine kinase activity);GO:0004430(1-phosphatidylinositol 4-kinase activity)	*	*	KOG0001(OR)(Ubiquitin and ubiquitin-like proteins)	sp|Q9ZPY9|P4KG4_ARATH	sp|Q9ZPY9|P4KG4_ARATH Phosphatidylinositol 4-kinase gamma 4 OS=Arabidopsis thaliana GN=PI4KG4 PE=1 SV=1
response to stress	Lus10030284.g	0.48	0.11	0.46	0.71	0.23	0.34	0.98	1.28	2.98	3.54	3.89	3.13	0.55	0.3	1.56	1.66	OAY37535.1	hypothetical protein MANES_11G109100 [Manihot esculenta]	GO:0006281(DNA repair);GO:0000724(double-strand break repair via homologous recombination);GO:0000730(DNA recombinase assembly);GO:0006312(mitotic recombination);GO:0007126(meiotic cell cycle);GO:0007131(reciprocal meiotic recombination);GO:0007140(male meiotic nuclear division);GO:0007143(female meiotic nuclear division);GO:0010212(response to ionizing radiation);GO:0016444(somatic cell DNA reco…	GO:0000794(condensed nuclear chromosome);GO:0005654(nucleoplasm)	GO:0008094(DNA-dependent ATPase activity);GO:0003677(DNA binding);GO:0005524(ATP binding);GO:0000166(nucleotide binding);GO:0000150(recombinase activity);GO:0000400(four-way junction DNA binding);GO:0003684(damaged DNA binding);GO:0003690(double-stranded DNA binding);GO:0003697(single-stranded DNA binding);GO:0004520(endodeoxyribonuclease activity);GO:0005515(protein binding)	K10870|RAD51L2, RAD51C|http://www.genome.jp/dbget-bin/www_bget?ko:K10870	ko03440(Homologous recombination)	KOG1434(DL)(Meiotic recombination protein Dmc1)	sp|Q8GXF0|RA51C_ARATH	sp|Q8GXF0|RA51C_ARATH DNA repair protein RAD51 homolog 3 OS=Arabidopsis thaliana GN=RAD51C PE=1 SV=2
response to stress	Lus10030288.g	13.34	14.71	10.83	12.29	28.03	31.63	30.1	28.77	22.01	20.86	20.93	25.21	25.03	20	35.53	30.87	XP_011017479.1	PREDICTED: arginase 1, mitochondrial [Populus euphratica]	GO:0000050(urea cycle);GO:0006525(arginine metabolic process);GO:0006527(arginine catabolic process);GO:0042742(defense response to bacterium);GO:0006595(polyamine metabolic process)	GO:0005739(mitochondrion);GO:0009507(chloroplast)	GO:0046872(metal ion binding);GO:0016813(hydrolase activity, acting on carbon-nitrogen (but not peptide) bonds, in linear amidines);GO:0016787(hydrolase activity);GO:0004053(arginase activity);GO:0050897(cobalt ion binding);GO:0008783(agmatinase activity)	K01476|E3.5.3.1, rocF, arg|http://www.genome.jp/dbget-bin/www_bget?ko:K01476	ko00330(Arginine and proline metabolism);ko00220(Arginine biosynthesis);ko01230(Biosynthesis of amino acids)	KOG2964(E)(Arginase family protein)	sp|B8AU84|ARGI1_ORYSI;sp|P46637|ARGI1_ARATH	sp|B8AU84|ARGI1_ORYSI Arginase 1, mitochondrial OS=Oryza sativa subsp. indica GN=B0616E02-H0507E05.7 PE=1 SV=1;sp|P46637|ARGI1_ARATH Arginase 1, mitochondrial OS=Arabidopsis thaliana GN=ARGAH1 PE=2 SV=1
response to stress	Lus10030345.g	0.75	0.83	1.79	1.3	0.66	0.52	4.56	2.96	4.26	4.44	3.49	3.86	1.45	1	4.7	5.38	OAY58695.1	hypothetical protein MANES_02G199900 [Manihot esculenta]	GO:0007165(signal transduction);GO:0006952(defense response)	GO:0016020(membrane);GO:0016021(integral component of membrane)	GO:0043531(ADP binding)	*	*	*	sp|Q40392|TMVRN_NICGU;sp|F4I594|RLM1A_ARATH	sp|Q40392|TMVRN_NICGU TMV resistance protein N OS=Nicotiana glutinosa GN=N PE=1 SV=1;sp|F4I594|RLM1A_ARATH Disease resistance protein RML1A OS=Arabidopsis thaliana GN=RLM1A PE=4 SV=1
response to stress	Lus10030376.g	5.19	4.8	4.58	4.09	17.05	14.78	15.5	12.54	12.33	11.12	10.96	12.67	13.72	9.23	14.82	14.68	XP_002321013.1	DNA mismatch repair family protein [Populus trichocarpa]	GO:0006310(DNA recombination);GO:0010154(fruit development);GO:0048316(seed development);GO:0009555(pollen development);GO:0006298(mismatch repair);GO:0007131(reciprocal meiotic recombination);GO:0006974(cellular response to DNA damage stimulus);GO:0006281(DNA repair)	GO:0032389(MutLalpha complex);GO:0032300(mismatch repair complex);GO:0005634(nucleus)	GO:0030983(mismatched DNA binding);GO:0003697(single-stranded DNA binding);GO:0005524(ATP binding);GO:0016887(ATPase activity)	K10858|PMS2|http://www.genome.jp/dbget-bin/www_bget?ko:K10858	ko03430(Mismatch repair)	KOG1978(L)(DNA mismatch repair protein - MLH2/PMS1/Pms2 family)	sp|Q941I6|PMS1_ARATH	sp|Q941I6|PMS1_ARATH DNA mismatch repair protein PMS1 OS=Arabidopsis thaliana GN=PMS1 PE=1 SV=1
response to stress	Lus10030597.g	1.47	2.75	1.53	0.76	3.2	5.44	8.5	5.45	4.9	6.38	8.83	6.49	8.2	4.85	10.09	7.41	XP_012085420.1	PREDICTED: BOI-related E3 ubiquitin-protein ligase 1-like isoform X2 [Jatropha curcas]	GO:0031347(regulation of defense response);GO:0016567(protein ubiquitination)	GO:0005634(nucleus)	GO:0004842(ubiquitin-protein transferase activity);GO:0008270(zinc ion binding)	K19042|BOI|http://www.genome.jp/dbget-bin/www_bget?ko:K19042	*	*	sp|Q9LDD1|BRG3_ARATH	sp|Q9LDD1|BRG3_ARATH Probable BOI-related E3 ubiquitin-protein ligase 3 OS=Arabidopsis thaliana GN=BRG3 PE=1 SV=1
response to stress	Lus10030599.g	3.36	2.97	6.18	5.09	41.62	46.65	23.18	34.11	19.13	21.75	15.47	18.85	41.25	36.85	28.27	24.98	XP_012085419.1	PREDICTED: BOI-related E3 ubiquitin-protein ligase 1-like isoform X1 [Jatropha curcas]	GO:0031347(regulation of defense response);GO:0016567(protein ubiquitination)	GO:0005634(nucleus)	GO:0004842(ubiquitin-protein transferase activity);GO:0008270(zinc ion binding)	K19042|BOI|http://www.genome.jp/dbget-bin/www_bget?ko:K19042	*	*	sp|Q9LDD1|BRG3_ARATH	sp|Q9LDD1|BRG3_ARATH Probable BOI-related E3 ubiquitin-protein ligase 3 OS=Arabidopsis thaliana GN=BRG3 PE=1 SV=1
response to stress	Lus10030656.g	0.63	0.57	1.07	0.69	0.86	1.21	1.2	2.76	3.89	2.24	1.73	2.02	0.81	1.23	1.89	2.51	XP_012092039.1	PREDICTED: DNA polymerase beta [Jatropha curcas]	GO:0006281(DNA repair)	GO:0005634(nucleus)	GO:0003677(DNA binding);GO:0034061(DNA polymerase activity);GO:0003887(DNA-directed DNA polymerase activity);GO:0016779(nucleotidyltransferase activity)	K03512|POLL|http://www.genome.jp/dbget-bin/www_bget?ko:K03512	ko03410(Base excision repair);ko03450(Non-homologous end-joining)	KOG2534(L)(DNA polymerase IV (family X))	sp|Q9FNY4|DPOLL_ARATH	sp|Q9FNY4|DPOLL_ARATH DNA polymerase lambda OS=Arabidopsis thaliana GN=POLL PE=1 SV=1
response to stress	Lus10030731.g	3.37	4.43	3.64	3.86	6.78	5.71	13.46	15.01	12.58	13.41	10.68	9.31	6.39	4.87	12.73	7.89	XP_010094543.1	putative protein phosphatase 2C 27 [Morus notabilis]	GO:0006470(protein dephosphorylation);GO:0061416(regulation of transcription from RNA polymerase II promoter in response to salt stress);GO:0009651(response to salt stress)	GO:0005737(cytoplasm);GO:0005634(nucleus)	GO:0004722(protein serine/threonine phosphatase activity);GO:0004721(phosphoprotein phosphatase activity);GO:0046872(metal ion binding);GO:0003824(catalytic activity);GO:0016787(hydrolase activity);GO:0043169(cation binding)	K14803|PTC2_3|http://www.genome.jp/dbget-bin/www_bget?ko:K14803	*	KOG0698(T)(Serine/threonine protein phosphatase)	sp|P93006|P2C27_ARATH	sp|P93006|P2C27_ARATH Probable protein phosphatase 2C 27 OS=Arabidopsis thaliana GN=PP2C27 PE=2 SV=1
response to stress	Lus10030805.g	6.65	5.16	21.51	17.95	263.31	126.68	28.65	16.29	9.23	7.92	16.79	8.33	432.76	202.52	33.49	24.65	XP_004300630.1	PREDICTED: glutathione S-transferase U17-like [Fragaria vesca subsp. vesca]	GO:0009407(toxin catabolic process);GO:0006749(glutathione metabolic process);GO:0048527(lateral root development);GO:0080167(response to karrikin);GO:0080148(negative regulation of response to water deprivation);GO:0009636(response to toxic substance);GO:0040008(regulation of growth);GO:0060416(response to growth hormone);GO:0009651(response to salt stress);GO:0009704(de-etiolation)	GO:0005737(cytoplasm);GO:0005829(cytosol);GO:0009507(chloroplast)	GO:0004364(glutathione transferase activity);GO:0016740(transferase activity)	K00799|GST, gst|http://www.genome.jp/dbget-bin/www_bget?ko:K00799	ko00480(Glutathione metabolism)	*	sp|Q9FUS8|GSTUH_ARATH	sp|Q9FUS8|GSTUH_ARATH Glutathione S-transferase U17 OS=Arabidopsis thaliana GN=GSTU17 PE=2 SV=1
response to stress	Lus10030891.g	3.29	3.04	5.48	5.76	7.17	9.8	15.26	13.24	11.75	8.69	12.9	8.26	18.59	13.83	25.88	21.5	XP_012085420.1	PREDICTED: BOI-related E3 ubiquitin-protein ligase 1-like isoform X2 [Jatropha curcas]	GO:0031347(regulation of defense response);GO:0016567(protein ubiquitination)	GO:0005634(nucleus)	GO:0004842(ubiquitin-protein transferase activity);GO:0008270(zinc ion binding)	K19042|BOI|http://www.genome.jp/dbget-bin/www_bget?ko:K19042	*	*	sp|Q9LDD1|BRG3_ARATH	sp|Q9LDD1|BRG3_ARATH Probable BOI-related E3 ubiquitin-protein ligase 3 OS=Arabidopsis thaliana GN=BRG3 PE=1 SV=1
response to stress	Lus10030971.g	1.72	2.49	2.03	2.09	3.85	3.06	5.14	8.84	8	9.02	7.47	7.25	2.58	3.02	5.02	6.03	OAY57577.1	hypothetical protein MANES_02G107600 [Manihot esculenta]	GO:0006281(DNA repair)	GO:0005634(nucleus)	*	K02830|HRAD1, RAD17|http://www.genome.jp/dbget-bin/www_bget?ko:K02830	*	*	sp|Q9QWZ1|RAD1_MOUSE	sp|Q9QWZ1|RAD1_MOUSE Cell cycle checkpoint protein RAD1 OS=Mus musculus GN=Rad1 PE=1 SV=1
response to stress	Lus10031594.g	6.08	6.58	4.21	3.98	77.33	171.98	42.26	59	17.87	16.25	11.69	14.55	63.13	30.73	27.33	53.44	XP_015576995.1	PREDICTED: uncharacterized protein LOC8266932 [Ricinus communis]	GO:0006950(response to stress)	*	*	*	*	*	sp|Q8VYN9|PHO32_ARATH;sp|Q8L4N1|PHO34_ARATH	sp|Q8VYN9|PHO32_ARATH Universal stress protein PHOS32 OS=Arabidopsis thaliana GN=PHOS32 PE=1 SV=1;sp|Q8L4N1|PHO34_ARATH Universal stress protein PHOS34 OS=Arabidopsis thaliana GN=PHOS34 PE=1 SV=1
response to stress	Lus10031664.g	4.03	4.35	2.57	5.59	4.92	6.28	14.15	11.78	2.04	1.79	3.06	1.79	3.81	3.43	5.17	9.18	EEF51466.1	Peroxidase 66 precursor, putative [Ricinus communis]	GO:0042744(hydrogen peroxide catabolic process);GO:0006979(response to oxidative stress);GO:0055114(oxidation-reduction process);GO:0009664(plant-type cell wall organization)	GO:0005576(extracellular region);GO:0009505(plant-type cell wall)	GO:0016491(oxidoreductase activity);GO:0004601(peroxidase activity);GO:0020037(heme binding);GO:0046872(metal ion binding)	K00430|E1.11.1.7|http://www.genome.jp/dbget-bin/www_bget?ko:K00430	ko00940(Phenylpropanoid biosynthesis)	*	sp|Q9LT91|PER66_ARATH	sp|Q9LT91|PER66_ARATH Peroxidase 66 OS=Arabidopsis thaliana GN=PER66 PE=2 SV=1
response to stress	Lus10032127.g	0.17	0.18	0.39	0.15	0	0.81	16.93	20.28	1.62	1.62	0	0.34	0	0	7.26	4.05	ABB01616.1	oleosin high molecular weight isoform [Linum usitatissimum]	GO:0010344(seed oilbody biogenesis);GO:0050826(response to freezing);GO:0019915(lipid storage)	GO:0016020(membrane);GO:0016021(integral component of membrane);GO:0012511(monolayer-surrounded lipid storage body)	*	*	*	*	sp|Q39165|OLEO2_ARATH	sp|Q39165|OLEO2_ARATH Oleosin 21.2 kDa OS=Arabidopsis thaliana GN=At5g40420 PE=2 SV=1
response to stress	Lus10032142.g	12.01	7.8	10.53	11.09	30.42	18.57	77.75	77.63	45.7	48.86	31.58	36.46	20.56	19.09	64.15	47.14	XP_015879073.1	PREDICTED: universal stress protein A-like protein [Ziziphus jujuba]	GO:0006950(response to stress)	*	*	*	*	*	sp|Q8LGG8|USPAL_ARATH	sp|Q8LGG8|USPAL_ARATH Universal stress protein A-like protein OS=Arabidopsis thaliana GN=At3g01520 PE=1 SV=2
response to stress	Lus10032178.g	2.11	4.77	5.23	6.44	7.37	3.31	33.88	6.9	4.82	21.84	30.97	4.86	36.09	16.58	88.71	18	XP_010024764.1	PREDICTED: major allergen Pru ar 1 [Eucalyptus grandis]	GO:0009607(response to biotic stimulus);GO:0006952(defense response)	*	*	*	*	*	sp|O50001|PRU1_PRUAR	sp|O50001|PRU1_PRUAR Major allergen Pru ar 1 OS=Prunus armeniaca PE=1 SV=1
response to stress	Lus10032195.g	4.7	3.45	3.75	3.24	3.06	4.49	6.99	9.84	6.3	4.93	4.76	4.75	3.39	3.81	14.52	14.63	XP_006368713.1	hypothetical protein POPTR_0001s08030g [Populus trichocarpa]	GO:0006281(DNA repair);GO:0009650(UV protection);GO:0000719(photoreactive repair)	*	GO:0003904(deoxyribodipyrimidine photo-lyase activity);GO:0003913(DNA photolyase activity);GO:0016829(lyase activity)	K01669|phrB|http://www.genome.jp/dbget-bin/www_bget?ko:K01669	*	*	sp|Q9SB00|PHR_ARATH;sp|Q6F6A2|PHR_ORYSJ	sp|Q9SB00|PHR_ARATH Deoxyribodipyrimidine photo-lyase OS=Arabidopsis thaliana GN=PHR1 PE=2 SV=1;sp|Q6F6A2|PHR_ORYSJ Deoxyribodipyrimidine photo-lyase OS=Oryza sativa subsp. japonica GN=PHR PE=1 SV=1
response to stress	Lus10032252.g	2.67	2.18	1.58	2.09	11.29	7.41	36.74	15.47	3.33	3.07	3.93	2.98	13.68	5.99	25.33	17.11	XP_002303512.2	nitrate transporter family protein [Populus trichocarpa]	GO:0006810(transport);GO:0010167(response to nitrate);GO:0015706(nitrate transport);GO:0006857(oligopeptide transport);GO:0009414(response to water deprivation)	GO:0005886(plasma membrane);GO:0016020(membrane);GO:0016021(integral component of membrane)	GO:0005215(transporter activity);GO:0015112(nitrate transmembrane transporter activity)	K14638|SLC15A3_4, PHT|http://www.genome.jp/dbget-bin/www_bget?ko:K14638	*	*	sp|Q05085|PTR7_ARATH	sp|Q05085|PTR7_ARATH Protein NRT1/ PTR FAMILY 6.3 OS=Arabidopsis thaliana GN=NPF6.3 PE=1 SV=1
response to stress	Lus10032469.g	0.25	0.11	0.14	0.05	0.44	0.23	0.59	0.31	0.61	0.42	0.62	0.45	0.04	0.07	0.41	0.44	XP_002511977.1	PREDICTED: DNA mismatch repair protein MSH2 [Ricinus communis]	GO:0006974(cellular response to DNA damage stimulus);GO:0006298(mismatch repair);GO:0006281(DNA repair);GO:0006311(meiotic gene conversion);GO:0007131(reciprocal meiotic recombination);GO:0045128(negative regulation of reciprocal meiotic recombination);GO:0000710(meiotic mismatch repair);GO:0043570(maintenance of DNA repeat elements);GO:0006301(postreplication repair)	GO:0032300(mismatch repair complex);GO:0032301(MutSalpha complex);GO:0032302(MutSbeta complex);GO:0000228(nuclear chromosome)	GO:0003677(DNA binding);GO:0005524(ATP binding);GO:0030983(mismatched DNA binding);GO:0000166(nucleotide binding);GO:0032137(guanine/thymine mispair binding);GO:0000404(heteroduplex DNA loop binding);GO:0000403(Y-form DNA binding);GO:0000400(four-way junction DNA binding);GO:0003684(damaged DNA binding);GO:0000406(double-strand/single-strand DNA junction binding)	K08735|MSH2|http://www.genome.jp/dbget-bin/www_bget?ko:K08735	ko03430(Mismatch repair)	KOG0217(L)(Mismatch repair ATPase MSH6 (MutS family))	sp|O24617|MSH2_ARATH	sp|O24617|MSH2_ARATH DNA mismatch repair protein MSH2 OS=Arabidopsis thaliana GN=MSH2 PE=1 SV=1
response to stress	Lus10032515.g	1.68	1.67	1.49	1.67	3.04	3.92	6.37	4.7	5.03	3.52	5.85	4.57	4.99	5.78	7.41	7.08	XP_015579653.1	PREDICTED: uncharacterized protein LOC8275459 isoform X1 [Ricinus communis]	GO:0006281(DNA repair)	GO:0005634(nucleus)	GO:0016818(hydrolase activity, acting on acid anhydrides, in phosphorus-containing anhydrides);GO:0003676(nucleic acid binding);GO:0008270(zinc ion binding);GO:0008081(phosphoric diester hydrolase activity)	*	*	*	*	*
response to stress	Lus10032557.g	40.26	66.15	99.39	92.66	132.14	137.75	465.21	466.29	246.84	249.73	270.62	277.36	159.94	95.95	420.64	348.89	XP_002321716.2	hypothetical protein POPTR_0015s11180g [Populus trichocarpa]	GO:0006950(response to stress);GO:0009737(response to abscisic acid)	GO:0016020(membrane);GO:0016021(integral component of membrane)	*	K17279|REEP5_6|http://www.genome.jp/dbget-bin/www_bget?ko:K17279	*	KOG1726(V)(HVA22/DP1 gene product-related proteins)	sp|Q9FED2|HA22E_ARATH	sp|Q9FED2|HA22E_ARATH HVA22-like protein e OS=Arabidopsis thaliana GN=HVA22E PE=2 SV=1
response to stress	Lus10032563.g	7.54	9.57	7.67	7.78	18.4	15.63	25.92	26.4	24.82	25.42	20.19	17.97	15.95	13.69	23.59	25.05	OAY28437.1	hypothetical protein MANES_15G066500 [Manihot esculenta]	GO:0042538(hyperosmotic salinity response);GO:0032456(endocytic recycling);GO:0051260(protein homooligomerization);GO:0006897(endocytosis)	GO:0005737(cytoplasm);GO:0010008(endosome membrane);GO:0005886(plasma membrane);GO:0016020(membrane);GO:0005768(endosome);GO:0043231(intracellular membrane-bounded organelle);GO:0009506(plasmodesma)	GO:0005509(calcium ion binding);GO:0005525(GTP binding);GO:0000166(nucleotide binding);GO:0016787(hydrolase activity);GO:0005515(protein binding)	K12483|EHD1|http://www.genome.jp/dbget-bin/www_bget?ko:K12483	ko04144(Endocytosis)	KOG0998(TU)(Synaptic vesicle protein EHS-1 and related EH domain proteins)	sp|Q94CF0|EHD1_ARATH	sp|Q94CF0|EHD1_ARATH EH domain-containing protein 1 OS=Arabidopsis thaliana GN=EHD1 PE=1 SV=1
response to stress	Lus10032602.g	1.05	1.52	4.98	1.38	8.39	10.13	32.58	33.19	11.51	11.59	11.95	9.02	16.46	11.6	40.09	31	XP_012073172.1	PREDICTED: protein LURP-one-related 5 [Jatropha curcas]	GO:0006952(defense response)	*	*	*	*	*	sp|Q9LVZ8|LOR12_ARATH	sp|Q9LVZ8|LOR12_ARATH Protein LURP-one-related 12 OS=Arabidopsis thaliana GN=At3g15810 PE=2 SV=1
response to stress	Lus10032759.g	4.64	5.84	31.24	16.06	17.14	22.27	58.71	20.97	23.26	37.06	41.62	32.74	85.06	49.63	142.23	108.68	OAY50882.1	hypothetical protein MANES_05G169600 [Manihot esculenta]	GO:0006952(defense response)	*	GO:0043531(ADP binding)	*	*	*	sp|Q9FW44|ADR1_ARATH;sp|Q9SZA7|DRL29_ARATH	sp|Q9FW44|ADR1_ARATH Disease resistance protein ADR1 OS=Arabidopsis thaliana GN=ADR1 PE=2 SV=2;sp|Q9SZA7|DRL29_ARATH Probable disease resistance protein At4g33300 OS=Arabidopsis thaliana GN=At4g33300 PE=2 SV=3
response to stress	Lus10033274.g	1.46	1.61	1.5	1.42	2.99	3.19	7.56	5.53	6.51	6.87	4.24	5.58	2.67	2.5	5.2	5.03	XP_012085006.1	PREDICTED: DNA mismatch repair protein MLH1 [Jatropha curcas]	GO:0006298(mismatch repair);GO:0006355(regulation of transcription, DNA-templated)	GO:0032389(MutLalpha complex);GO:0000795(synaptonemal complex);GO:0005712(chiasma);GO:0005739(mitochondrion)	GO:0005524(ATP binding);GO:0030983(mismatched DNA binding);GO:0003697(single-stranded DNA binding);GO:0016887(ATPase activity);GO:0003690(double-stranded DNA binding)	K08734|MLH1|http://www.genome.jp/dbget-bin/www_bget?ko:K08734	ko03430(Mismatch repair)	KOG1978(L)(DNA mismatch repair protein - MLH2/PMS1/Pms2 family)	sp|Q9ZRV4|MLH1_ARATH	sp|Q9ZRV4|MLH1_ARATH DNA mismatch repair protein MLH1 OS=Arabidopsis thaliana GN=MLH1 PE=2 SV=1
response to stress	Lus10033432.g	1.37	0.6	1.57	0.99	1.37	0.82	21.75	29.95	1.57	3.82	1.63	0.81	2.07	0.68	22.77	8.15	XP_006381613.1	hypothetical protein POPTR_0006s14320g [Populus trichocarpa]	GO:0006952(defense response)	*	*	*	*	*	sp|Q9ZUF7|LOR6_ARATH	sp|Q9ZUF7|LOR6_ARATH Protein LURP-one-related 6 OS=Arabidopsis thaliana GN=At2g05910 PE=2 SV=1
response to stress	Lus10033471.g	11.81	11.88	17.02	10.56	16.79	17.71	37.24	39.79	39.46	37.29	33.7	36.63	15.77	18.33	31.54	32.86	XP_010033678.1	PREDICTED: uncharacterized protein LOC104422912 isoform X2 [Eucalyptus grandis]	GO:0055114(oxidation-reduction process);GO:0006281(DNA repair)	*	GO:0016491(oxidoreductase activity)	*	*	*	sp|P05050|ALKB_ECOLI	sp|P05050|ALKB_ECOLI Alpha-ketoglutarate-dependent dioxygenase AlkB OS=Escherichia coli (strain K12) GN=alkB PE=1 SV=1
response to stress	Lus10033499.g	10.86	10.33	8.43	9.77	13.94	28.73	31.67	72.93	15.91	9.81	9.21	7.9	19.09	20.08	39.46	43.08	XP_015580130.1	PREDICTED: cryptochrome DASH, chloroplastic/mitochondrial [Ricinus communis]	GO:0006281(DNA repair)	*	GO:0003913(DNA photolyase activity)	K01669|phrB|http://www.genome.jp/dbget-bin/www_bget?ko:K01669	*	KOG0133(LT)(Deoxyribodipyrimidine photolyase/cryptochrome)	sp|Q651U1|CRYD_ORYSJ;sp|Q84KJ5|CRYD_ARATH	sp|Q651U1|CRYD_ORYSJ Cryptochrome DASH, chloroplastic/mitochondrial OS=Oryza sativa subsp. japonica GN=CRYD PE=2 SV=1;sp|Q84KJ5|CRYD_ARATH Cryptochrome DASH, chloroplastic/mitochondrial OS=Arabidopsis thaliana GN=CRYD PE=1 SV=2
response to stress	Lus10033749.g	1.59	1.12	2.83	1.07	21.43	43.26	27.48	54.65	5.01	3.37	4.63	4.55	31.93	11.83	34.36	42.23	XP_012092460.1	PREDICTED: uncharacterized protein LOC105650178 isoform X2 [Jatropha curcas]	GO:0006950(response to stress)	*	*	*	*	*	sp|Q8VYN9|PHO32_ARATH	sp|Q8VYN9|PHO32_ARATH Universal stress protein PHOS32 OS=Arabidopsis thaliana GN=PHOS32 PE=1 SV=1
response to stress	Lus10033750.g	7.07	6.42	7.69	7.73	20.22	27.43	21.48	22.88	10.53	10.84	9.88	9.94	20.84	20.49	12.11	16.23	XP_012092496.1	PREDICTED: frataxin, mitochondrial isoform X1 [Jatropha curcas]	GO:0016226(iron-sulfur cluster assembly);GO:0055114(oxidation-reduction process);GO:0042542(response to hydrogen peroxide);GO:0006979(response to oxidative stress);GO:0009060(aerobic respiration)	GO:0005739(mitochondrion)	GO:0008199(ferric iron binding);GO:0004322(ferroxidase activity)	K19054|FXN|http://www.genome.jp/dbget-bin/www_bget?ko:K19054	ko00860(Porphyrin and chlorophyll metabolism)	KOG3413(P)(Mitochondrial matrix protein frataxin, involved in Fe/S protein biosynthesis)	sp|Q9ZR07|FRDA_ARATH	sp|Q9ZR07|FRDA_ARATH Frataxin, mitochondrial OS=Arabidopsis thaliana GN=FH PE=1 SV=2
response to stress	Lus10033840.g	3.3	1.98	3.25	3.12	12.11	9.6	13.72	11.31	5.63	5.68	6.72	6.54	11.31	9.17	11.37	8.58	XP_012089169.1	PREDICTED: sodium/hydrogen exchanger 2 [Jatropha curcas]	GO:0055075(potassium ion homeostasis);GO:0006814(sodium ion transport);GO:0006810(transport);GO:0006885(regulation of pH);GO:0055085(transmembrane transport);GO:0006811(ion transport);GO:0009651(response to salt stress);GO:0006812(cation transport)	GO:0005886(plasma membrane);GO:0016021(integral component of membrane);GO:0016020(membrane);GO:0005774(vacuolar membrane)	GO:0015299(solute:proton antiporter activity);GO:0015385(sodium:proton antiporter activity);GO:0015297(antiporter activity)	*	*	KOG1966(P)(Sodium/hydrogen exchanger protein)	sp|Q56XP4|NHX2_ARATH	sp|Q56XP4|NHX2_ARATH Sodium/hydrogen exchanger 2 OS=Arabidopsis thaliana GN=NHX2 PE=2 SV=2
response to stress	Lus10034303.g	0.1	0.21	1.07	0.4	1.73	1.07	3.63	1.9	0.64	2.07	0.75	0.09	5.6	1.31	6.94	4.02	XP_002529127.1	PREDICTED: uncharacterized protein LOC8269696 [Ricinus communis]	GO:0015031(protein transport);GO:0006979(response to oxidative stress)	*	*	K19476|IST1|http://www.genome.jp/dbget-bin/www_bget?ko:K19476	ko04144(Endocytosis)	KOG2027(Z)(Spindle pole body protein)	sp|Q54I39|IST1L_DICDI	sp|Q54I39|IST1L_DICDI IST1-like protein OS=Dictyostelium discoideum GN=DDB_G0289029 PE=3 SV=1
response to stress	Lus10034337.g	50.67	64.57	88.49	60.47	390.26	427.42	1724.44	1257.49	679.42	835.22	386.7	310.87	325.68	291.04	1055.68	861.6	OAY31336.1	hypothetical protein MANES_14G103900 [Manihot esculenta]	GO:0006950(response to stress)	*	*	*	*	*	sp|Q8LGG8|USPAL_ARATH	sp|Q8LGG8|USPAL_ARATH Universal stress protein A-like protein OS=Arabidopsis thaliana GN=At3g01520 PE=1 SV=2
response to stress	Lus10034568.g	33.45	43.47	54.29	53.93	46.21	66.72	162.4	183.34	125.95	114.79	88.9	97.31	45.96	41.12	153.66	81.05	ACB41781.1	dehydrin [Rhododendron catawbiense]	GO:0006950(response to stress);GO:0009415(response to water);GO:0009737(response to abscisic acid);GO:0009631(cold acclimation);GO:0009414(response to water deprivation)	GO:0005829(cytosol);GO:0016020(membrane)	*	*	*	*	sp|Q9XJ56|ECP44_DAUCA;sp|P42763|ERD14_ARATH	sp|Q9XJ56|ECP44_DAUCA Phosphoprotein ECPP44 OS=Daucus carota GN=ECPP44 PE=1 SV=1;sp|P42763|ERD14_ARATH Dehydrin ERD14 OS=Arabidopsis thaliana GN=ERD14 PE=1 SV=1
response to stress	Lus10034734.g	2.06	2.17	1.29	0.8	2.01	1.82	8.87	11.84	20.71	18.36	10.39	10.4	1.73	2.47	7.54	8.93	XP_012085006.1	PREDICTED: DNA mismatch repair protein MLH1 [Jatropha curcas]	GO:0006298(mismatch repair);GO:0019915(lipid storage)	GO:0032389(MutLalpha complex);GO:0000795(synaptonemal complex);GO:0005712(chiasma);GO:0016020(membrane);GO:0016021(integral component of membrane)	GO:0005524(ATP binding);GO:0030983(mismatched DNA binding);GO:0003697(single-stranded DNA binding);GO:0016887(ATPase activity)	K08734|MLH1|http://www.genome.jp/dbget-bin/www_bget?ko:K08734;K19365|BSCL2|http://www.genome.jp/dbget-bin/www_bget?ko:K19365	ko03430(Mismatch repair)	KOG1978(L)(DNA mismatch repair protein - MLH2/PMS1/Pms2 family);KOG1979(L)(DNA mismatch repair protein - MLH1 family)	sp|Q9ZRV4|MLH1_ARATH;sp|Q8L615|SEI3_ARATH	sp|Q9ZRV4|MLH1_ARATH DNA mismatch repair protein MLH1 OS=Arabidopsis thaliana GN=MLH1 PE=2 SV=1;sp|Q8L615|SEI3_ARATH Seipin-3 OS=Arabidopsis thaliana GN=SEI3 PE=2 SV=1
response to stress	Lus10034749.g	0.83	0.85	0.68	0.81	1.26	2.03	3.86	3.29	3.08	4.16	2.21	2.43	1.19	1.49	4.76	4.38	XP_010056154.1	PREDICTED: mediator of RNA polymerase II transcription subunit 34 isoform X1 [Eucalyptus grandis]	GO:0044237(cellular metabolic process);GO:0006310(DNA recombination);GO:0006281(DNA repair);GO:0006260(DNA replication);GO:0000724(double-strand break repair via homologous recombination);GO:0032508(DNA duplex unwinding)	GO:0005622(intracellular);GO:0005737(cytoplasm);GO:0016592(mediator complex);GO:0005694(chromosome);GO:0005634(nucleus)	GO:0008026(ATP-dependent helicase activity);GO:0003676(nucleic acid binding);GO:0043140(ATP-dependent 3'-5' DNA helicase activity);GO:0003824(catalytic activity);GO:0005524(ATP binding);GO:0004386(helicase activity);GO:0000166(nucleotide binding);GO:0016787(hydrolase activity);GO:0003677(DNA binding);GO:0009378(four-way junction helicase activity);GO:0043138(3'-5' DNA helicase activity)	K10899|RECQL|http://www.genome.jp/dbget-bin/www_bget?ko:K10899	*	KOG0351(L)(ATP-dependent DNA helicase)	sp|Q9FT73|MED34_ARATH	sp|Q9FT73|MED34_ARATH Mediator of RNA polymerase II transcription subunit 34 OS=Arabidopsis thaliana GN=MED34 PE=1 SV=1
response to stress	Lus10034761.g	6.03	5.95	7.06	5.9	15.97	10.86	19.63	16.97	10.52	10.24	8.39	11.37	16.61	12.18	14.43	14.03	OAY33831.1	hypothetical protein MANES_13G128600 [Manihot esculenta]	GO:0006952(defense response)	*	GO:0043531(ADP binding)	*	*	*	sp|Q9FKZ1|DRL42_ARATH	sp|Q9FKZ1|DRL42_ARATH Probable disease resistance protein At5g66900 OS=Arabidopsis thaliana GN=At5g66900 PE=3 SV=1
response to stress	Lus10035204.g	0.27	0.1	1.35	0.33	0.22	0.74	0.45	1.28	1.21	1.46	1.37	1.39	1.33	1.11	4.43	2.98	OAY29656.1	hypothetical protein MANES_15G161900 [Manihot esculenta]	GO:0042744(hydrogen peroxide catabolic process);GO:0055114(oxidation-reduction process);GO:0006979(response to oxidative stress)	GO:0005576(extracellular region)	GO:0020037(heme binding);GO:0046872(metal ion binding);GO:0016491(oxidoreductase activity);GO:0004601(peroxidase activity)	K00430|E1.11.1.7|http://www.genome.jp/dbget-bin/www_bget?ko:K00430	ko00940(Phenylpropanoid biosynthesis)	*	sp|Q9SZE7|PER51_ARATH;sp|Q96509|PER55_ARATH	sp|Q9SZE7|PER51_ARATH Peroxidase 51 OS=Arabidopsis thaliana GN=PER51 PE=2 SV=1;sp|Q96509|PER55_ARATH Peroxidase 55 OS=Arabidopsis thaliana GN=PER55 PE=1 SV=1
response to stress	Lus10035332.g	4.34	4.24	4.63	4.68	16.96	17.91	15.26	16.24	4	3.21	3.62	2.73	15.34	13.75	18.92	15.16	OAY35060.1	hypothetical protein MANES_12G068900 [Manihot esculenta]	GO:0016567(protein ubiquitination);GO:0055114(oxidation-reduction process);GO:0032436(positive regulation of proteasomal ubiquitin-dependent protein catabolic process);GO:0048573(photoperiodism, flowering);GO:0010119(regulation of stomatal movement);GO:0006281(DNA repair);GO:0009649(entrainment of circadian clock);GO:0009641(shade avoidance);GO:0046283(anthocyanin-containing compound metabolic pr…	GO:0016604(nuclear body);GO:0005654(nucleoplasm);GO:0005634(nucleus)	GO:0061630(ubiquitin protein ligase activity);GO:0008270(zinc ion binding);GO:0046872(metal ion binding);GO:0032440(2-alkenal reductase [NAD(P)] activity);GO:0016491(oxidoreductase activity);GO:0016874(ligase activity);GO:0004842(ubiquitin-protein transferase activity);GO:0042802(identical protein binding)	K10143|RFWD2, COP1|http://www.genome.jp/dbget-bin/www_bget?ko:K10143	ko04120(Ubiquitin mediated proteolysis);ko04712(Circadian rhythm - plant)	KOG0264(B)(Nucleosome remodeling factor, subunit CAF1/NURF55/MSI1)	sp|P43254|COP1_ARATH	sp|P43254|COP1_ARATH E3 ubiquitin-protein ligase COP1 OS=Arabidopsis thaliana GN=COP1 PE=1 SV=2
response to stress	Lus10035670.g	1.27	3.52	5.31	2.39	19.55	36.72	63.12	22.99	10.54	13.27	11.82	12.45	38.79	9.77	30.99	18.01	XP_010533275.1	PREDICTED: ubiquinol oxidase 1a, mitochondrial-like, partial [Tarenaya hassleriana]	GO:0055114(oxidation-reduction process);GO:0009409(response to cold);GO:0031930(mitochondria-nucleus signaling pathway);GO:0045333(cellular respiration)	GO:0005743(mitochondrial inner membrane);GO:0070469(respiratory chain);GO:0016020(membrane);GO:0005739(mitochondrion);GO:0016021(integral component of membrane)	GO:0009916(alternative oxidase activity);GO:0046872(metal ion binding);GO:0016491(oxidoreductase activity)	K17893|AOX1, AOX2|http://www.genome.jp/dbget-bin/www_bget?ko:K17893	*	*	sp|Q39219|AOX1A_ARATH	sp|Q39219|AOX1A_ARATH Ubiquinol oxidase 1a, mitochondrial OS=Arabidopsis thaliana GN=AOX1A PE=1 SV=2
response to stress	Lus10035734.g	34.75	31.7	31.54	32.68	88.61	125.04	148.15	254.24	69.97	56.62	41.92	52.91	67.78	93.41	120.99	110.35	XP_012070771.1	PREDICTED: uncharacterized protein LOC105632914 [Jatropha curcas]	GO:0006979(response to oxidative stress)	GO:0031977(thylakoid lumen);GO:0009535(chloroplast thylakoid membrane);GO:0009507(chloroplast)	*	*	*	*	sp|Q9STS7|CHL_ARATH	sp|Q9STS7|CHL_ARATH Chloroplastic lipocalin OS=Arabidopsis thaliana GN=CHL PE=1 SV=1
response to stress	Lus10035832.g	0.14	0.04	0.22	0.2	1.3	0.34	15.6	15.26	7.29	7.48	6.23	4.15	0.41	0.17	13.36	7.37	XP_006474711.1	PREDICTED: protein LAZ1 homolog 2 [Citrus sinensis]	GO:0009626(plant-type hypersensitive response)	GO:0016020(membrane);GO:0016021(integral component of membrane)	*	*	*	KOG2641(T)(Predicted seven transmembrane receptor - rhodopsin family)	sp|Q5BPZ5|LAZH2_ARATH	sp|Q5BPZ5|LAZH2_ARATH Protein LAZ1 homolog 2 OS=Arabidopsis thaliana GN=At1g23070 PE=2 SV=1
response to stress	Lus10036237.g	1.08	0.87	1.45	1.07	1.89	2.34	2.92	2.78	3.02	2.92	3.05	3.62	2.68	2.99	5.39	5.74	XP_012065131.1	PREDICTED: DNA polymerase eta-like [Jatropha curcas]	GO:0006281(DNA repair)	*	GO:0003684(damaged DNA binding)	K03509|POLH|http://www.genome.jp/dbget-bin/www_bget?ko:K03509	*	KOG2095(L)(DNA polymerase iota/DNA damage inducible protein)	sp|Q8H2D5|POLH_ARATH	sp|Q8H2D5|POLH_ARATH DNA polymerase eta OS=Arabidopsis thaliana GN=POLH PE=1 SV=1
response to stress	Lus10036319.g	0.28	0.63	0.11	0.82	0.91	0.34	1.83	1.03	1.96	1.84	1.04	1.47	0.94	0.43	1.59	1.12	XP_010429919.1	PREDICTED: DNA damage-binding protein CMR1-like [Camelina sativa]	GO:0006974(cellular response to DNA damage stimulus);GO:0009737(response to abscisic acid);GO:0009414(response to water deprivation)	*	*	*	*	KOG4328(S)(WD40 protein)	sp|Q7S1H9|CMR1_NEUCR	sp|Q7S1H9|CMR1_NEUCR DNA damage-binding protein cmr1 OS=Neurospora crassa (strain ATCC 24698 / 74-OR23-1A / CBS 708.71 / DSM 1257 / FGSC 987) GN=NCU09302 PE=3 SV=1
response to stress	Lus10036337.g	20.15	21.28	31.04	22.13	109.05	79.13	93.75	77.62	72.12	82.97	68.98	78.84	103.4	69.37	77.86	76.87	XP_002515309.1	PREDICTED: probable protein disulfide-isomerase A6 [Ricinus communis]	GO:0045454(cell redox homeostasis);GO:0034976(response to endoplasmic reticulum stress);GO:0006457(protein folding)	GO:0005783(endoplasmic reticulum)	GO:0003756(protein disulfide isomerase activity);GO:0016853(isomerase activity)	K09584|PDIA6, TXNDC7|http://www.genome.jp/dbget-bin/www_bget?ko:K09584	ko04141(Protein processing in endoplasmic reticulum)	KOG0191(O)(Thioredoxin/protein disulfide isomerase)	sp|P38661|PDIA6_MEDSA;sp|O22263|PDI21_ARATH	sp|P38661|PDIA6_MEDSA Probable protein disulfide-isomerase A6 OS=Medicago sativa PE=2 SV=1;sp|O22263|PDI21_ARATH Protein disulfide-isomerase like 2-1 OS=Arabidopsis thaliana GN=PDIL2-1 PE=2 SV=1
response to stress	Lus10036402.g	85.15	103.59	105.03	113.36	105.85	100.68	638.73	825.54	429.55	333.69	273	312.73	228.43	85.98	488.67	398.63	XP_002511927.1	PREDICTED: desiccation protectant protein Lea14 homolog [Ricinus communis]	GO:0009269(response to desiccation)	*	*	*	*	*	sp|P46519|LEA14_SOYBN	sp|P46519|LEA14_SOYBN Desiccation protectant protein Lea14 homolog OS=Glycine max PE=2 SV=1
response to stress	Lus10036529.g	0.33	0.15	0.17	0.13	0.23	0.39	0.86	0.56	1.94	2.03	1.41	0.99	0.27	0.17	0.62	0.78	XP_002316365.2	hypothetical protein POPTR_0010s22900g [Populus trichocarpa]	GO:0034976(response to endoplasmic reticulum stress);GO:0045454(cell redox homeostasis);GO:0006457(protein folding)	GO:0005783(endoplasmic reticulum)	GO:0003756(protein disulfide isomerase activity)	*	*	*	sp|O64584|WAP_ARATH	sp|O64584|WAP_ARATH WPP domain-associated protein OS=Arabidopsis thaliana GN=WAP PE=1 SV=2
response to stress	Lus10036618.g	3.16	2.28	3.81	2.78	6.29	5.12	15.98	17.47	11.55	11.82	7.81	7.06	5.39	6.25	16.6	17.27	XP_012070728.1	PREDICTED: autophagy-related protein 18f [Jatropha curcas]	GO:0042594(response to starvation);GO:0016192(vesicle-mediated transport)	GO:0016021(integral component of membrane);GO:0016020(membrane);GO:0005737(cytoplasm)	*	*	*	KOG2110(S)(Uncharacterized conserved protein, contains WD40 repeats)	sp|Q8GUL1|AT18G_ARATH;sp|Q9FH32|AT18F_ARATH	sp|Q8GUL1|AT18G_ARATH Autophagy-related protein 18g OS=Arabidopsis thaliana GN=ATG18G PE=2 SV=1;sp|Q9FH32|AT18F_ARATH Autophagy-related protein 18f OS=Arabidopsis thaliana GN=ATG18F PE=2 SV=1
response to stress	Lus10036695.g	0.43	0	0	0	0.83	6.45	20.97	9.84	0.61	0.45	0.23	0	0	1.33	7.02	3.86	ABK94905.1	unknown [Populus trichocarpa]	GO:0055114(oxidation-reduction process);GO:0045454(cell redox homeostasis);GO:0000103(sulfate assimilation);GO:0006457(protein folding);GO:0034599(cellular response to oxidative stress);GO:0006662(glycerol ether metabolic process)	GO:0005886(plasma membrane);GO:0005829(cytosol)	GO:0016671(oxidoreductase activity, acting on a sulfur group of donors, disulfide as acceptor);GO:0015035(protein disulfide oxidoreductase activity)	K03671|trxA|http://www.genome.jp/dbget-bin/www_bget?ko:K03671	*	KOG0907(O)(Thioredoxin)	sp|Q38879|TRXH2_ARATH	sp|Q38879|TRXH2_ARATH Thioredoxin H2 OS=Arabidopsis thaliana GN=TRX2 PE=2 SV=2
response to stress	Lus10036698.g	6.54	5.18	16.35	8.37	89.84	117.27	30.74	45.11	2.44	4.21	2.89	2.02	141.93	113.76	33.16	28.2	XP_015894861.1	PREDICTED: thioredoxin H2 [Ziziphus jujuba]	GO:0045454(cell redox homeostasis);GO:0006662(glycerol ether metabolic process);GO:0055114(oxidation-reduction process);GO:0000103(sulfate assimilation);GO:0006457(protein folding);GO:0034599(cellular response to oxidative stress)	GO:0005886(plasma membrane);GO:0005829(cytosol)	GO:0015035(protein disulfide oxidoreductase activity);GO:0016671(oxidoreductase activity, acting on a sulfur group of donors, disulfide as acceptor)	K03671|trxA|http://www.genome.jp/dbget-bin/www_bget?ko:K03671	*	KOG0907(O)(Thioredoxin)	sp|Q9CAS1|TRXH8_ARATH;sp|Q43636|TRXH_RICCO;sp|Q38879|TRXH2_ARATH	sp|Q9CAS1|TRXH8_ARATH Thioredoxin H8 OS=Arabidopsis thaliana GN=TRX8 PE=2 SV=1;sp|Q43636|TRXH_RICCO Thioredoxin H-type OS=Ricinus communis PE=3 SV=1;sp|Q38879|TRXH2_ARATH Thioredoxin H2 OS=Arabidopsis thaliana GN=TRX2 PE=2 SV=2
response to stress	Lus10037032.g	9.53	7.67	13.54	10.53	15.57	23.41	70.27	80.89	42.88	41.84	32.47	35.44	25.88	26.77	111.51	70.84	OAY32335.1	hypothetical protein MANES_13G010500 [Manihot esculenta]	GO:0016310(phosphorylation);GO:0000160(phosphorelay signal transduction system);GO:0007165(signal transduction);GO:0010150(leaf senescence);GO:0070417(cellular response to cold);GO:0080117(secondary growth);GO:0016036(cellular response to phosphate starvation);GO:0009909(regulation of flower development);GO:0071215(cellular response to abscisic acid stimulus);GO:0006970(response to osmotic stress)	GO:0016020(membrane);GO:0016021(integral component of membrane)	GO:0000155(phosphorelay sensor kinase activity);GO:0016772(transferase activity, transferring phosphorus-containing groups);GO:0016301(kinase activity);GO:0043424(protein histidine kinase binding);GO:0004673(protein histidine kinase activity)	K14489|AHK2_3_4|http://www.genome.jp/dbget-bin/www_bget?ko:K14489	ko04075(Plant hormone signal transduction)	KOG0519(T)(Sensory transduction histidine kinase)	sp|Q9C5U1|AHK3_ARATH	sp|Q9C5U1|AHK3_ARATH Histidine kinase 3 OS=Arabidopsis thaliana GN=AHK3 PE=1 SV=1
response to stress	Lus10037136.g	0.66	0.62	0.63	0.46	2.1	2.65	3.56	2.99	2.5	2.89	2.43	3.26	2.97	0.99	2.58	3.02	XP_002316108.2	hypothetical protein POPTR_0010s17100g [Populus trichocarpa]	GO:0010267(production of ta-siRNAs involved in RNA interference);GO:0040034(regulation of development, heterochronic);GO:0010050(vegetative phase change);GO:0010599(production of lsiRNA involved in RNA interference);GO:0060145(viral gene silencing in virus induced gene silencing);GO:0006413(translational initiation)	GO:0005737(cytoplasm)	GO:0003676(nucleic acid binding);GO:0003743(translation initiation factor activity)	K11593|ELF2C, AGO|http://www.genome.jp/dbget-bin/www_bget?ko:K11593	*	KOG1041(J)(Translation initiation factor 2C (eIF-2C) and related proteins)	sp|Q9C793|AGO7_ARATH	sp|Q9C793|AGO7_ARATH Protein argonaute 7 OS=Arabidopsis thaliana GN=AGO7 PE=2 SV=1
response to stress	Lus10037228.g	0.52	0.83	0	0	2.05	7.24	9.81	5.96	0.25	0	0	0	0	0.65	1.69	1.57	ABK94905.1	unknown [Populus trichocarpa]	GO:0055114(oxidation-reduction process);GO:0045454(cell redox homeostasis);GO:0000103(sulfate assimilation);GO:0006457(protein folding);GO:0034599(cellular response to oxidative stress);GO:0006662(glycerol ether metabolic process)	GO:0005886(plasma membrane);GO:0005829(cytosol)	GO:0016671(oxidoreductase activity, acting on a sulfur group of donors, disulfide as acceptor);GO:0015035(protein disulfide oxidoreductase activity)	K03671|trxA|http://www.genome.jp/dbget-bin/www_bget?ko:K03671	*	KOG0907(O)(Thioredoxin)	sp|Q9XIF4|TRXH7_ARATH	sp|Q9XIF4|TRXH7_ARATH Thioredoxin H7 OS=Arabidopsis thaliana GN=TRX7 PE=2 SV=1
response to stress	Lus10037370.g	17.08	14.03	11.54	12.36	25.06	33.54	66.55	63.85	19.54	25.81	23.63	22.74	24.54	19.22	56.47	40.12	XP_012064674.1	PREDICTED: pheophorbide a oxygenase, chloroplastic [Jatropha curcas]	GO:0055114(oxidation-reduction process);GO:0009908(flower development);GO:0010154(fruit development);GO:0015996(chlorophyll catabolic process);GO:0009816(defense response to bacterium, incompatible interaction);GO:0008219(cell death)	GO:0009534(chloroplast thylakoid);GO:0009941(chloroplast envelope);GO:0009507(chloroplast)	GO:0051537(2 iron, 2 sulfur cluster binding);GO:0046872(metal ion binding);GO:0010277(chlorophyllide a oxygenase [overall] activity);GO:0051536(iron-sulfur cluster binding);GO:0016491(oxidoreductase activity);GO:0032441(pheophorbide a oxygenase activity)	K13071|PAO, ACD1|http://www.genome.jp/dbget-bin/www_bget?ko:K13071	ko00860(Porphyrin and chlorophyll metabolism)	*	sp|Q9FYC2|PAO_ARATH	sp|Q9FYC2|PAO_ARATH Pheophorbide a oxygenase, chloroplastic OS=Arabidopsis thaliana GN=PAO PE=1 SV=1
response to stress	Lus10037584.g	4.23	3.92	6.7	2.36	8.51	8.34	13.86	19.13	11.64	9.36	4.74	5.88	8.79	10.23	22.49	19.81	XP_012069078.1	PREDICTED: clavaminate synthase-like protein At3g21360 [Jatropha curcas]	GO:0006974(cellular response to DNA damage stimulus);GO:0010224(response to UV-B);GO:0055114(oxidation-reduction process)	GO:0016021(integral component of membrane);GO:0016020(membrane);GO:0005634(nucleus)	GO:0016491(oxidoreductase activity)	K13728|MAD2L2|http://www.genome.jp/dbget-bin/www_bget?ko:K13728	*	*	sp|Q94FL5|REV7_ARATH;sp|Q9LIG0|Y3136_ARATH	sp|Q94FL5|REV7_ARATH DNA polymerase zeta processivity subunit OS=Arabidopsis thaliana GN=REV7 PE=2 SV=1;sp|Q9LIG0|Y3136_ARATH Clavaminate synthase-like protein At3g21360 OS=Arabidopsis thaliana GN=At3g21360 PE=1 SV=1
response to stress	Lus10037596.g	7.96	9.87	9.74	6.76	40.76	47.83	22.79	17.64	10.99	11.7	14.43	8.44	43.98	34.72	31.88	27.8	XP_011038097.1	PREDICTED: thioredoxin reductase NTRB-like [Populus euphratica]	GO:0019430(removal of superoxide radicals);GO:0055114(oxidation-reduction process)	GO:0005737(cytoplasm)	GO:0004791(thioredoxin-disulfide reductase activity);GO:0016491(oxidoreductase activity)	K00384|trxB|http://www.genome.jp/dbget-bin/www_bget?ko:K00384	ko00450(Selenocompound metabolism)	KOG0404(O)(Thioredoxin reductase)	sp|Q39242|TRXB2_ARATH	sp|Q39242|TRXB2_ARATH Thioredoxin reductase 2 OS=Arabidopsis thaliana GN=NTR2 PE=2 SV=2
response to stress	Lus10037630.g	1.39	2.11	1.37	0.86	8.7	9.34	7.66	8.22	4.48	3.73	2.93	2.4	12.31	10.38	7.6	6.06	XP_012068964.1	PREDICTED: nucleosome assembly protein 1;4 [Jatropha curcas]	GO:0006334(nucleosome assembly);GO:0000724(double-strand break repair via homologous recombination);GO:0006281(DNA repair);GO:0009294(DNA mediated transformation);GO:0016444(somatic cell DNA recombination);GO:0046686(response to cadmium ion)	GO:0005634(nucleus);GO:0005737(cytoplasm);GO:0005829(cytosol);GO:0005886(plasma membrane)	GO:0042393(histone binding);GO:0003677(DNA binding);GO:0005515(protein binding);GO:0042802(identical protein binding)	K11279|NAP1L1, NRP|http://www.genome.jp/dbget-bin/www_bget?ko:K11279	*	KOG1508(L)(DNA replication factor/protein phosphatase inhibitor SET/SPR-2)	sp|Q9ZUP3|NAP1B_ARATH	sp|Q9ZUP3|NAP1B_ARATH Nucleosome assembly protein 1;2 OS=Arabidopsis thaliana GN=NAP1;2 PE=1 SV=1
response to stress	Lus10037672.g	5.78	5.69	8.31	5.74	13.27	17.11	35.02	36.43	7.15	7.46	5.47	6.85	15.42	12.09	29.21	21.46	OAY36409.1	hypothetical protein MANES_11G019500 [Manihot esculenta]	GO:0015969(guanosine tetraphosphate metabolic process);GO:0042594(response to starvation)	GO:0009507(chloroplast)	GO:0008893(guanosine-3',5'-bis(diphosphate) 3'-diphosphatase activity);GO:0008728(GTP diphosphokinase activity)	*	*	*	sp|Q9SYH1|RSH3C_ARATH	sp|Q9SYH1|RSH3C_ARATH Probable GTP diphosphokinase RSH3, chloroplastic OS=Arabidopsis thaliana GN=RSH3 PE=2 SV=1
response to stress	Lus10037702.g	52.4	49.51	67.9	56.59	99.86	140.15	161.65	154.27	78.54	90.99	75.79	64.99	146.36	136.64	176.55	163.51	XP_003546877.1	PREDICTED: zinc finger A20 and AN1 domain-containing stress-associated protein 5 [Glycine max]	GO:0051865(protein autoubiquitination);GO:0016567(protein ubiquitination);GO:0006970(response to osmotic stress);GO:0009414(response to water deprivation)	GO:0005634(nucleus)	GO:0003677(DNA binding);GO:0008270(zinc ion binding);GO:0046872(metal ion binding);GO:0004842(ubiquitin-protein transferase activity)	*	*	KOG3173(R)(Predicted Zn-finger protein)	sp|Q9LHJ8|SAP5_ARATH	sp|Q9LHJ8|SAP5_ARATH Zinc finger A20 and AN1 domain-containing stress-associated protein 5 OS=Arabidopsis thaliana GN=SAP5 PE=2 SV=1
response to stress	Lus10037733.g	0.33	0.28	6.83	2.56	0.21	0.2	2.56	1.48	0.86	1.46	2.98	1.93	7.92	3.09	7.02	8.16	XP_015897193.1	PREDICTED: G-type lectin S-receptor-like serine/threonine-protein kinase SD1-1 [Ziziphus jujuba]	GO:0006952(defense response);GO:0006468(protein phosphorylation);GO:0048544(recognition of pollen);GO:0016310(phosphorylation)	GO:0005886(plasma membrane);GO:0016020(membrane);GO:0016021(integral component of membrane);GO:0009506(plasmodesma)	GO:0004672(protein kinase activity);GO:0004674(protein serine/threonine kinase activity);GO:0005524(ATP binding);GO:0004713(protein tyrosine kinase activity);GO:0016301(kinase activity);GO:0016740(transferase activity);GO:0000166(nucleotide binding)	*	*	*	sp|O81833|SD11_ARATH;sp|O81832|Y4729_ARATH	sp|O81833|SD11_ARATH G-type lectin S-receptor-like serine/threonine-protein kinase SD1-1 OS=Arabidopsis thaliana GN=SD11 PE=1 SV=1;sp|O81832|Y4729_ARATH G-type lectin S-receptor-like serine/threonine-protein kinase At4g27290 OS=Arabidopsis thaliana GN=At4g27290 PE=3 SV=4
response to stress	Lus10037761.g	58.96	59.92	71.46	91.11	185.5	283.71	343.78	450.6	295.28	268.34	286.09	358.19	179.78	139.97	267.48	244.09	XP_010259285.1	PREDICTED: universal stress protein PHOS32 [Nelumbo nucifera]	GO:0006950(response to stress)	GO:0005886(plasma membrane)	*	*	*	*	sp|Q8L4N1|PHO34_ARATH	sp|Q8L4N1|PHO34_ARATH Universal stress protein PHOS34 OS=Arabidopsis thaliana GN=PHOS34 PE=1 SV=1
response to stress	Lus10037786.g	4.24	4.62	7.85	4.27	10.96	12.77	15.84	12.18	14.1	9.96	12.07	15.38	10.39	13.86	14.88	15	AHL39159.1	class III peroxidase [Populus trichocarpa]	GO:0042744(hydrogen peroxide catabolic process);GO:0006979(response to oxidative stress);GO:0055114(oxidation-reduction process)	GO:0005576(extracellular region);GO:0016020(membrane);GO:0016021(integral component of membrane)	GO:0016491(oxidoreductase activity);GO:0004601(peroxidase activity);GO:0020037(heme binding);GO:0046872(metal ion binding)	K00430|E1.11.1.7|http://www.genome.jp/dbget-bin/www_bget?ko:K00430	ko00940(Phenylpropanoid biosynthesis)	*	sp|O23474|PER40_ARATH;sp|Q96B42|TMM18_HUMAN	sp|O23474|PER40_ARATH Peroxidase 40 OS=Arabidopsis thaliana GN=PER40 PE=2 SV=2;sp|Q96B42|TMM18_HUMAN Transmembrane protein 18 OS=Homo sapiens GN=TMEM18 PE=1 SV=2
response to stress	Lus10037867.g	5.87	7.43	7.68	7.42	26.37	31.93	23.47	24.12	15.69	17.58	15.9	19.45	39.06	24.86	26.31	22.42	OAY28614.1	hypothetical protein MANES_15G081300 [Manihot esculenta]	GO:0006950(response to stress)	*	*	*	*	*	sp|Q8L4N1|PHO34_ARATH	sp|Q8L4N1|PHO34_ARATH Universal stress protein PHOS34 OS=Arabidopsis thaliana GN=PHOS34 PE=1 SV=1
response to stress	Lus10038561.g	11.08	12.65	14.96	12.46	45.83	52.33	38.42	41.77	29.41	26.57	28.09	28.36	67.11	52.85	44.11	42.44	XP_009127088.1	PREDICTED: universal stress protein PHOS32 [Brassica rapa]	GO:0006950(response to stress)	*	GO:0016787(hydrolase activity)	*	*	*	sp|Q8VYN9|PHO32_ARATH;sp|Q8L4N1|PHO34_ARATH	sp|Q8VYN9|PHO32_ARATH Universal stress protein PHOS32 OS=Arabidopsis thaliana GN=PHOS32 PE=1 SV=1;sp|Q8L4N1|PHO34_ARATH Universal stress protein PHOS34 OS=Arabidopsis thaliana GN=PHOS34 PE=1 SV=1
response to stress	Lus10038845.g	19.14	24.85	18.3	18.78	58.33	37.09	106.96	80.9	50.23	59.88	49.6	52.59	47.26	24.43	96.78	80.79	XP_019453198.1	PREDICTED: heat shock protein 83 isoform X2 [Lupinus angustifolius]	GO:0006950(response to stress);GO:0006457(protein folding)	*	GO:0051082(unfolded protein binding);GO:0005524(ATP binding)	K04079|htpG, HSP90A|http://www.genome.jp/dbget-bin/www_bget?ko:K04079	ko04141(Protein processing in endoplasmic reticulum);ko04626(Plant-pathogen interaction)	KOG0020(O)(Endoplasmic reticulum glucose-regulated protein (GRP94/endoplasmin), HSP90 family)	sp|P51819|HSP83_IPONI;sp|P36182|HSP82_TOBAC	sp|P51819|HSP83_IPONI Heat shock protein 83 OS=Ipomoea nil GN=HSP83A PE=2 SV=1;sp|P36182|HSP82_TOBAC Heat shock protein 82 (Fragment) OS=Nicotiana tabacum GN=HSP82 PE=2 SV=1
response to stress	Lus10039205.g	0.88	0.57	0.67	0.37	1.48	1.54	3.11	2.15	3.14	3.09	2.56	1.66	1.28	1.71	1.67	1.75	XP_012072725.1	PREDICTED: non-structural maintenance of chromosomes element 4 homolog A isoform X2 [Jatropha curcas]	GO:0006281(DNA repair)	GO:0030915(Smc5-Smc6 complex);GO:0005634(nucleus)	*	*	*	KOG2866(S)(Uncharacterized conserved protein)	sp|Q9C689|NSE4A_ARATH	sp|Q9C689|NSE4A_ARATH Non-structural maintenance of chromosomes element 4 homolog A OS=Arabidopsis thaliana GN=NSE4A PE=2 SV=1
response to stress	Lus10039245.g	1.89	2.42	2.1	2.1	3.9	3.75	4.73	3.62	4.81	4.89	5.12	4.26	7.38	6.15	8.08	7.42	AND01192.1	putative leucine-rich repeat receptor-like protein kinase [Linum usitatissimum]	GO:0016567(protein ubiquitination);GO:0006468(protein phosphorylation);GO:0016310(phosphorylation);GO:0006950(response to stress)	GO:0005886(plasma membrane)	GO:0004672(protein kinase activity);GO:0005524(ATP binding);GO:0004842(ubiquitin-protein transferase activity);GO:0016301(kinase activity)	*	*	*	sp|Q8GUH1|PUB33_ARATH;sp|Q94A51|PUB32_ARATH	sp|Q8GUH1|PUB33_ARATH U-box domain-containing protein 33 OS=Arabidopsis thaliana GN=PUB33 PE=2 SV=2;sp|Q94A51|PUB32_ARATH U-box domain-containing protein 32 OS=Arabidopsis thaliana GN=PUB32 PE=2 SV=1
response to stress	Lus10039281.g	0.56	1.09	0.62	0.81	46.25	21.18	10.98	11.27	0.53	0.03	0.23	0.27	28.75	5.28	2.34	2.22	KNA17790.1	hypothetical protein SOVF_076870 [Spinacia oleracea]	GO:0006950(response to stress);GO:0006457(protein folding)	*	GO:0051082(unfolded protein binding);GO:0005524(ATP binding)	K04079|htpG, HSP90A|http://www.genome.jp/dbget-bin/www_bget?ko:K04079	ko04141(Protein processing in endoplasmic reticulum);ko04626(Plant-pathogen interaction)	KOG0020(O)(Endoplasmic reticulum glucose-regulated protein (GRP94/endoplasmin), HSP90 family)	sp|P36182|HSP82_TOBAC	sp|P36182|HSP82_TOBAC Heat shock protein 82 (Fragment) OS=Nicotiana tabacum GN=HSP82 PE=2 SV=1
response to stress	Lus10039383.g	0.13	0.47	0.25	0.2	1.7	1.46	1.73	2.01	0.78	0.48	0.94	0.62	0.92	0.85	1.32	1.67	XP_015573480.1	PREDICTED: meiotic recombination protein DMC1 homolog isoform X2 [Ricinus communis]	GO:0006259(DNA metabolic process);GO:0007131(reciprocal meiotic recombination);GO:0006281(DNA repair)	GO:0005634(nucleus)	GO:0008094(DNA-dependent ATPase activity);GO:0003677(DNA binding);GO:0005524(ATP binding);GO:0000166(nucleotide binding)	K10872|DMC1|http://www.genome.jp/dbget-bin/www_bget?ko:K10872	*	KOG1434(DL)(Meiotic recombination protein Dmc1)	sp|Q96449|DMC1_SOYBN	sp|Q96449|DMC1_SOYBN Meiotic recombination protein DMC1 homolog OS=Glycine max PE=2 SV=1
response to stress	Lus10039509.g	0.12	0.15	0.05	0.07	0.11	0.06	0.34	0.22	0.16	0.18	0.29	0.4	0.16	0.06	0.24	0.2	XP_012091750.1	PREDICTED: putative disease resistance RPP13-like protein 1 [Jatropha curcas]	GO:0006952(defense response)	*	GO:0004721(phosphoprotein phosphatase activity);GO:0043531(ADP binding);GO:0016787(hydrolase activity)	*	*	*	sp|Q9LRR4|R13L1_ARATH	sp|Q9LRR4|R13L1_ARATH Putative disease resistance RPP13-like protein 1 OS=Arabidopsis thaliana GN=RPPL1 PE=3 SV=1
response to stress	Lus10039518.g	3.21	3.48	4.39	4.04	12.52	24.08	19.87	21.96	11.66	11.77	9.45	10.01	17.86	13.68	21.77	20.56	XP_011022896.1	PREDICTED: probable leucine-rich repeat receptor-like serine/threonine-protein kinase At5g15730 [Populus euphratica]	GO:0006950(response to stress);GO:0006468(protein phosphorylation);GO:0016310(phosphorylation)	*	GO:0004672(protein kinase activity);GO:0005524(ATP binding);GO:0004674(protein serine/threonine kinase activity);GO:0000166(nucleotide binding);GO:0016301(kinase activity);GO:0016787(hydrolase activity)	*	*	*	sp|Q9LV48|PERK1_ARATH;sp|P0DH62|Y4407_SELML;sp|Q9CAL8|PEK13_ARATH	sp|Q9LV48|PERK1_ARATH Proline-rich receptor-like protein kinase PERK1 OS=Arabidopsis thaliana GN=PERK1 PE=2 SV=1;sp|P0DH62|Y4407_SELML Inactive protein kinase SELMODRAFT_444075 OS=Selaginella moellendorffii GN=SELMODRAFT_444075 PE=2 SV=1;sp|Q9CAL8|PEK13_ARATH Proline-rich receptor-like protein kinase PERK13 OS=Arabidopsis thaliana GN=PERK13 PE=1 SV=1
response to stress	Lus10039540.g	1.39	1.4	1.32	0.98	3.59	2.7	5.09	4.77	2.89	3.34	2.59	2.6	2.19	1.33	4.48	3.74	OAY32673.1	hypothetical protein MANES_13G036800 [Manihot esculenta]	GO:0006952(defense response)	*	GO:0043531(ADP binding);GO:0004721(phosphoprotein phosphatase activity);GO:0016787(hydrolase activity)	*	*	*	sp|Q9LRR4|R13L1_ARATH	sp|Q9LRR4|R13L1_ARATH Putative disease resistance RPP13-like protein 1 OS=Arabidopsis thaliana GN=RPPL1 PE=3 SV=1
response to stress	Lus10039548.g	0.89	1.21	1.48	0.82	1.78	2.67	5.97	8.55	5.27	5.53	3.4	3.56	1.68	0.72	6.53	4.64	XP_002525331.1	PREDICTED: putative disease resistance RPP13-like protein 1 [Ricinus communis]	GO:0006952(defense response);GO:0007165(signal transduction)	*	GO:0004721(phosphoprotein phosphatase activity);GO:0043531(ADP binding);GO:0016787(hydrolase activity)	*	*	*	sp|Q9LRR4|R13L1_ARATH	sp|Q9LRR4|R13L1_ARATH Putative disease resistance RPP13-like protein 1 OS=Arabidopsis thaliana GN=RPPL1 PE=3 SV=1
response to stress	Lus10039566.g	1.63	1.28	1.19	1.29	2.07	2.13	3.79	3.81	4.1	3.21	3.38	2.76	2.22	2.06	5.25	4.33	XP_011042136.1	PREDICTED: crossover junction endonuclease MUS81 isoform X2 [Populus euphratica]	GO:0006259(DNA metabolic process);GO:0006281(DNA repair)	GO:0048476(Holliday junction resolvase complex);GO:0005634(nucleus)	GO:0003677(DNA binding);GO:0004518(nuclease activity);GO:0008821(crossover junction endodeoxyribonuclease activity);GO:0004519(endonuclease activity)	K08991|MUS81|http://www.genome.jp/dbget-bin/www_bget?ko:K08991	ko03440(Homologous recombination)	KOG2379(L)(Endonuclease MUS81)	sp|Q5W9E7|MUS81_ARATH	sp|Q5W9E7|MUS81_ARATH Crossover junction endonuclease MUS81 OS=Arabidopsis thaliana GN=MUS81 PE=1 SV=1
response to stress	Lus10039590.g	0.53	0.34	0.8	0.53	0.61	0.66	1.24	2.15	2.36	1.86	1.77	1.71	0.39	0.42	1.33	1.34	XP_012065615.1	PREDICTED: structural maintenance of chromosomes protein 5 [Jatropha curcas]	GO:0006281(DNA repair);GO:0071139(resolution of recombination intermediates);GO:0007062(sister chromatid cohesion);GO:0000724(double-strand break repair via homologous recombination)	GO:0030915(Smc5-Smc6 complex);GO:0009506(plasmodesma)	*	*	*	KOG0250(L)(DNA repair protein RAD18 (SMC family protein));KOG0964(D)(Structural maintenance of chromosome protein 3 (sister chromatid cohesion complex Cohesin, subunit SMC3))	sp|Q9LFS8|SMC5_ARATH	sp|Q9LFS8|SMC5_ARATH Structural maintenance of chromosomes protein 5 OS=Arabidopsis thaliana GN=SMC5 PE=2 SV=1
response to stress	Lus10039656.g	46.93	50.04	52.33	44.8	66.76	93.89	146.19	157.03	108.27	141.19	112.23	88.97	67.12	74.57	101.29	107.72	XP_002268684.1	PREDICTED: autophagy-related protein 8A [Vitis vinifera]	GO:0006914(autophagy);GO:0006995(cellular response to nitrogen starvation)	*	*	K08341|GABARAP, ATG8, LC3|http://www.genome.jp/dbget-bin/www_bget?ko:K08341	ko04136(Autophagy - other eukaryotes)	KOG1654(Z)(Microtubule-associated anchor protein involved in autophagy and membrane trafficking)	sp|Q9SL04|ATG8D_ARATH	sp|Q9SL04|ATG8D_ARATH Autophagy-related protein 8d OS=Arabidopsis thaliana GN=ATG8D PE=1 SV=1
response to stress	Lus10039730.g	6.92	9.64	10.56	10.33	19.61	10.67	19.14	32.04	30.16	19.33	19.52	34.54	17.88	26.83	30.78	34.78	OAY35267.1	hypothetical protein MANES_12G086000 [Manihot esculenta]	GO:0006950(response to stress)	*	*	*	*	*	sp|Q8L4N1|PHO34_ARATH	sp|Q8L4N1|PHO34_ARATH Universal stress protein PHOS34 OS=Arabidopsis thaliana GN=PHOS34 PE=1 SV=1
response to stress	Lus10039830.g	5.89	14.69	14.66	8.05	15.17	17.27	40.71	9.79	6.19	11.49	22.77	7.19	138.37	190.03	208.38	29.41	XP_006376489.1	hypothetical protein POPTR_0013s13460g [Populus trichocarpa]	GO:0009607(response to biotic stimulus);GO:0009738(abscisic acid-activated signaling pathway);GO:0006952(defense response);GO:0080163(regulation of protein serine/threonine phosphatase activity)	GO:0005737(cytoplasm);GO:0005634(nucleus)	GO:0004872(receptor activity);GO:0004864(protein phosphatase inhibitor activity);GO:0010427(abscisic acid binding)	*	*	*	sp|Q06394|ML146_PAPSO	sp|Q06394|ML146_PAPSO Major latex protein 146 OS=Papaver somniferum GN=MLP146 PE=2 SV=1
response to stress	Lus10039863.g	6.18	10.95	2.39	3.6	16.75	5.18	139.69	48.05	19.85	32.94	28.06	10.51	2.84	0.3	27.99	9.08	OAY57157.1	hypothetical protein MANES_02G075500 [Manihot esculenta]	GO:0009607(response to biotic stimulus);GO:0006952(defense response)	*	*	*	*	*	*	*
response to stress	Lus10039892.g	571.68	568.37	73.34	80.93	1026.96	245.35	1411.36	1312.57	250.23	234.98	62.99	93.57	326.17	122.74	147.9	1120.68	OAY57157.1	hypothetical protein MANES_02G075500 [Manihot esculenta]	GO:0009607(response to biotic stimulus);GO:0006952(defense response)	*	*	*	*	*	*	*
response to stress	Lus10039911.g	1.28	0.36	1.5	0.82	8.86	5.7	76.76	18.59	7.71	12.4	5.73	5.17	10.64	7.44	11.88	10.86	ADI39634.1	plastid jasmonates ZIM-domain protein [Hevea brasiliensis]	GO:0031347(regulation of defense response);GO:0009611(response to wounding);GO:2000022(regulation of jasmonic acid mediated signaling pathway);GO:1903507(negative regulation of nucleic acid-templated transcription)	GO:0005634(nucleus)	GO:0003714(transcription corepressor activity)	K13464|JAZ|http://www.genome.jp/dbget-bin/www_bget?ko:K13464	ko04075(Plant hormone signal transduction)	*	sp|Q9LMA8|TI10A_ARATH	sp|Q9LMA8|TI10A_ARATH Protein TIFY 10A OS=Arabidopsis thaliana GN=TIFY10A PE=1 SV=1
response to stress	Lus10039972.g	3.69	4.09	8.48	4.98	12.9	15.15	12.95	17.59	12.28	12.71	9.53	11.16	18.61	14.36	17.52	17.6	OAY31530.1	hypothetical protein MANES_14G119600 [Manihot esculenta]	GO:0030433(ubiquitin-dependent ERAD pathway);GO:0030970(retrograde protein transport, ER to cytosol)	GO:0005788(endoplasmic reticulum lumen)	*	K10088|OS9|http://www.genome.jp/dbget-bin/www_bget?ko:K10088	ko04141(Protein processing in endoplasmic reticulum)	KOG3394(R)(Protein OS-9)	sp|Q8GWH3|OS9_ARATH	sp|Q8GWH3|OS9_ARATH Protein OS-9 homolog OS=Arabidopsis thaliana GN=OS9 PE=1 SV=1
response to stress	Lus10040215.g	2.86	4.35	17.22	14.4	3.41	1.43	15.05	3.46	6.83	17.99	2.76	2.73	7.6	5.07	10.06	6.41	XP_012087761.1	PREDICTED: nematode resistance protein-like HSPRO2 [Jatropha curcas]	GO:0006952(defense response)	*	*	*	*	*	sp|O04203|HSPR2_ARATH	sp|O04203|HSPR2_ARATH Nematode resistance protein-like HSPRO2 OS=Arabidopsis thaliana GN=HSPRO2 PE=1 SV=1
response to stress	Lus10040306.g	1.89	1.91	2.12	1.07	1.85	2.27	3.84	3.36	5.89	4.61	6.88	6.61	1.85	1	3.72	5.23	KYP75449.1	Putative elongator complex protein 1 [Cajanus cajan]	GO:0002098(tRNA wobble uridine modification);GO:0006351(transcription, DNA-templated);GO:0006355(regulation of transcription, DNA-templated);GO:0031538(negative regulation of anthocyanin metabolic process);GO:0048530(fruit morphogenesis);GO:0035265(organ growth);GO:0008283(cell proliferation);GO:0009787(regulation of abscisic acid-activated signaling pathway);GO:0008284(positive regulation of cel…	GO:0005737(cytoplasm);GO:0033588(Elongator holoenzyme complex);GO:0005634(nucleus);GO:0005829(cytosol)	*	K11373|ELP1, IKI3, IKBKAP|http://www.genome.jp/dbget-bin/www_bget?ko:K11373	*	KOG1920(K)(IkappaB kinase complex, IKAP component)	sp|Q9FNA4|ELP1_ARATH	sp|Q9FNA4|ELP1_ARATH Elongator complex protein 1 OS=Arabidopsis thaliana GN=ELP1 PE=1 SV=1
response to stress	Lus10040573.g	0.3	0.25	0.26	0.15	0.3	0.42	1.57	1.87	1.26	1.21	1.18	1.62	0.38	0.31	0.8	1.22	XP_019078698.1	PREDICTED: U-box domain-containing protein 52 [Vitis vinifera]	GO:0006950(response to stress);GO:0006468(protein phosphorylation)	*	GO:0004672(protein kinase activity);GO:0005524(ATP binding)	K17609|NXN|http://www.genome.jp/dbget-bin/www_bget?ko:K17609	*	*	sp|Q9SW11|PUB35_ARATH	sp|Q9SW11|PUB35_ARATH U-box domain-containing protein 35 OS=Arabidopsis thaliana GN=PUB35 PE=1 SV=2
response to stress	Lus10041018.g	2.58	1.91	2.15	1.88	4.29	4.98	12.73	11.71	7.1	7.95	6.84	5.02	4.34	3.57	6.59	5.6	OAY53614.1	hypothetical protein MANES_03G010300 [Manihot esculenta]	GO:0016485(protein processing);GO:0009408(response to heat);GO:0019538(protein metabolic process)	GO:0005737(cytoplasm)	GO:0005524(ATP binding);GO:0000166(nucleotide binding)	K03695|clpB|http://www.genome.jp/dbget-bin/www_bget?ko:K03695	*	KOG1051(O)(Chaperone HSP104 and related ATP-dependent Clp proteases)	sp|Q8VYJ7|CLPB4_ARATH	sp|Q8VYJ7|CLPB4_ARATH Chaperone protein ClpB4, mitochondrial OS=Arabidopsis thaliana GN=CLPB4 PE=2 SV=1
response to stress	Lus10041348.g	14.85	15.07	16.41	13.64	53.28	62.77	161.05	113.68	20.78	25.07	20.97	19.04	51.95	30.65	103.45	60.07	XP_012064674.1	PREDICTED: pheophorbide a oxygenase, chloroplastic [Jatropha curcas]	GO:0055114(oxidation-reduction process);GO:0009908(flower development);GO:0010154(fruit development);GO:0015996(chlorophyll catabolic process);GO:0009816(defense response to bacterium, incompatible interaction);GO:0008219(cell death)	GO:0009534(chloroplast thylakoid);GO:0009941(chloroplast envelope);GO:0009507(chloroplast)	GO:0051537(2 iron, 2 sulfur cluster binding);GO:0046872(metal ion binding);GO:0010277(chlorophyllide a oxygenase [overall] activity);GO:0051536(iron-sulfur cluster binding);GO:0016491(oxidoreductase activity);GO:0032441(pheophorbide a oxygenase activity)	K13071|PAO, ACD1|http://www.genome.jp/dbget-bin/www_bget?ko:K13071	ko00860(Porphyrin and chlorophyll metabolism)	*	sp|Q9FYC2|PAO_ARATH	sp|Q9FYC2|PAO_ARATH Pheophorbide a oxygenase, chloroplastic OS=Arabidopsis thaliana GN=PAO PE=1 SV=1
response to stress	Lus10041375.g	1.08	0.96	2.82	1.53	1.95	2.35	3.16	3.31	2.83	2.86	3.84	4.1	3.66	2.81	4.65	3.51	XP_011035441.1	PREDICTED: flap endonuclease GEN-like 1 isoform X2 [Populus euphratica]	GO:0006281(DNA repair);GO:0009555(pollen development)	GO:0005634(nucleus)	GO:0003824(catalytic activity);GO:0003677(DNA binding);GO:0004518(nuclease activity);GO:0003690(double-stranded DNA binding);GO:0048256(flap endonuclease activity);GO:0003697(single-stranded DNA binding)	K15338|GEN1, GEN|http://www.genome.jp/dbget-bin/www_bget?ko:K15338	*	KOG2519(L)(5'-3' exonuclease)	sp|Q9LPD2|GENL1_ARATH	sp|Q9LPD2|GENL1_ARATH Flap endonuclease GEN-like 1 OS=Arabidopsis thaliana GN=GEN1 PE=3 SV=3
response to stress	Lus10041418.g	8.1	7.35	8.64	7.58	8.85	10.65	24.33	22.58	29.41	29.47	26.77	27.78	12.71	13.02	27.13	23.5	OAY42934.1	hypothetical protein MANES_08G028200 [Manihot esculenta]	GO:0045737(positive regulation of cyclin-dependent protein serine/threonine kinase activity);GO:0000079(regulation of cyclin-dependent protein serine/threonine kinase activity);GO:1901409(positive regulation of phosphorylation of RNA polymerase II C-terminal domain);GO:0045944(positive regulation of transcription from RNA polymerase II promoter);GO:0006355(regulation of transcription, DNA-templat…	GO:0000307(cyclin-dependent protein kinase holoenzyme complex);GO:0005634(nucleus);GO:0009506(plasmodesma)	GO:0019901(protein kinase binding);GO:0016538(cyclin-dependent protein serine/threonine kinase regulator activity)	*	*	KOG0835(R)(Cyclin L)	sp|Q8RWV3|CCL11_ARATH;sp|Q9AS36|CCL11_ORYSJ	sp|Q8RWV3|CCL11_ARATH Cyclin-L1-1 OS=Arabidopsis thaliana GN=CYCL1-1 PE=1 SV=2;sp|Q9AS36|CCL11_ORYSJ Cyclin-L1-1 OS=Oryza sativa subsp. japonica GN=CYCL1-1 PE=2 SV=1
response to stress	Lus10041436.g	60.4	59.12	102.48	80.05	265.61	284.11	1141.16	956.42	524.36	619.75	360.79	367.33	261.66	297.46	806.35	632.95	EOY00125.1	Adenine nucleotide alpha hydrolases-like superfamily protein [Theobroma cacao]	GO:0006950(response to stress)	*	*	*	*	*	sp|Q8LGG8|USPAL_ARATH	sp|Q8LGG8|USPAL_ARATH Universal stress protein A-like protein OS=Arabidopsis thaliana GN=At3g01520 PE=1 SV=2
response to stress	Lus10041606.g	4.7	7.55	38.86	11.4	55.13	44.1	39.06	42.77	20.96	13.31	8.25	5.32	125	104.39	113.79	131.7	XP_015576404.1	PREDICTED: uncharacterized protein LOC8283240 [Ricinus communis]	GO:0007165(signal transduction);GO:0006952(defense response)	GO:0016020(membrane);GO:0016021(integral component of membrane)	GO:0043531(ADP binding)	*	*	*	sp|Q9SSN3|TIR_ARATH	sp|Q9SSN3|TIR_ARATH Toll/interleukin-1 receptor-like protein OS=Arabidopsis thaliana GN=TIR PE=1 SV=1
response to stress	Lus10041679.g	0.52	0.71	2.69	1.29	1.49	0.75	4.18	2.56	3.98	3.48	3.59	3.74	4.78	3.83	9.56	10.15	OAY26056.1	hypothetical protein MANES_16G018200 [Manihot esculenta]	GO:0048544(recognition of pollen);GO:0045087(innate immune response);GO:0006468(protein phosphorylation)	GO:0005886(plasma membrane);GO:0009506(plasmodesma)	GO:0031625(ubiquitin protein ligase binding);GO:0004672(protein kinase activity);GO:0005524(ATP binding);GO:0004674(protein serine/threonine kinase activity)	*	*	*	sp|O81832|Y4729_ARATH	sp|O81832|Y4729_ARATH G-type lectin S-receptor-like serine/threonine-protein kinase At4g27290 OS=Arabidopsis thaliana GN=At4g27290 PE=3 SV=4
response to stress	Lus10041749.g	2.29	1.54	1.29	2.24	4.86	4.63	12.07	12.38	6.18	8.11	6.95	7.1	4.15	2.66	7.77	6.17	OAY57397.1	hypothetical protein MANES_02G094000 [Manihot esculenta]	GO:0006284(base-excision repair);GO:0006281(DNA repair);GO:0008152(metabolic process)	GO:0005634(nucleus)	GO:0003824(catalytic activity);GO:0008725(DNA-3-methyladenine glycosylase activity);GO:0003905(alkylbase DNA N-glycosylase activity);GO:0043916(DNA-7-methylguanine glycosylase activity);GO:0016798(hydrolase activity, acting on glycosyl bonds);GO:0052822(DNA-3-methylguanine glycosylase activity);GO:0016787(hydrolase activity);GO:0052821(DNA-7-methyladenine glycosylase activity);GO:0019104(DNA N-gl…	K01247|alkA|http://www.genome.jp/dbget-bin/www_bget?ko:K01247	ko03410(Base excision repair)	KOG1918(L)(3-methyladenine DNA glycosidase)	sp|Q92383|MAG1_SCHPO	sp|Q92383|MAG1_SCHPO DNA-3-methyladenine glycosylase 1 OS=Schizosaccharomyces pombe (strain 972 / ATCC 24843) GN=mag1 PE=1 SV=1
response to stress	Lus10041838.g	4.47	4.85	8.86	6.34	13	9.25	18.15	14.81	11.68	12.73	10.1	10.56	19.83	11.88	16.1	16.29	XP_002521670.1	PREDICTED: putative F-box protein At1g65770 [Ricinus communis]	GO:0006310(DNA recombination);GO:0006302(double-strand break repair);GO:0006284(base-excision repair);GO:0006260(DNA replication);GO:0032508(DNA duplex unwinding)	GO:0005737(cytoplasm);GO:0005694(chromosome);GO:0005634(nucleus)	GO:0003677(DNA binding);GO:0009378(four-way junction helicase activity);GO:0043140(ATP-dependent 3'-5' DNA helicase activity)	*	*	*	sp|Q9SHX9|FB72_ARATH;sp|Q3EBY8|FB111_ARATH	sp|Q9SHX9|FB72_ARATH Putative F-box protein At1g65770 OS=Arabidopsis thaliana GN=At1g65770 PE=4 SV=1;sp|Q3EBY8|FB111_ARATH F-box protein At2g17690 OS=Arabidopsis thaliana GN=SDC PE=2 SV=1
response to stress	Lus10041922.g	13.7	11.53	13.93	11.92	43.02	42.39	39.91	39.89	38.74	35.38	26.05	27.85	34.86	44.15	46.41	44.58	OAY57521.1	hypothetical protein MANES_02G103100 [Manihot esculenta]	GO:0030091(protein repair);GO:0055114(oxidation-reduction process);GO:0006979(response to oxidative stress)	*	GO:0016671(oxidoreductase activity, acting on a sulfur group of donors, disulfide as acceptor);GO:0008113(peptide-methionine (S)-S-oxide reductase activity);GO:0016491(oxidoreductase activity)	K07304|msrA|http://www.genome.jp/dbget-bin/www_bget?ko:K07304	*	KOG1635(O)(Peptide methionine sulfoxide reductase)	sp|Q9SL43|MSRA5_ARATH	sp|Q9SL43|MSRA5_ARATH Peptide methionine sulfoxide reductase A5 OS=Arabidopsis thaliana GN=MSRA5 PE=2 SV=1
response to stress	Lus10041969.g	0.37	0.13	0.14	0	0.31	0.15	3.38	5.06	1.65	0.93	0.54	0.36	0.43	0	1.9	1.22	XP_009765052.1	PREDICTED: late embryogenesis abundant protein [Nicotiana sylvestris]	GO:0006950(response to stress);GO:0009415(response to water);GO:0009737(response to abscisic acid);GO:0009631(cold acclimation);GO:0009414(response to water deprivation)	GO:0005829(cytosol)	*	*	*	*	sp|Q96261|DHLEA_ARATH	sp|Q96261|DHLEA_ARATH Probable dehydrin LEA OS=Arabidopsis thaliana GN=LEA PE=2 SV=1
response to stress	Lus10042235.g	2	1.2	1.44	1.06	3.77	3.28	2.75	7.11	5.84	5.46	4.12	3.7	5.81	4.94	7.36	5.7	AER92596.1	hypothetical protein [Linum usitatissimum]	GO:0006952(defense response)	GO:0005886(plasma membrane);GO:0016020(membrane);GO:0016021(integral component of membrane)	*	*	*	*	sp|Q8GWL2|LOR7_ARATH	sp|Q8GWL2|LOR7_ARATH Protein LURP-one-related 7 OS=Arabidopsis thaliana GN=At2g30270 PE=2 SV=1
response to stress	Lus10042316.g	15.14	18.3	33.72	13.36	47.67	46.2	69.86	52.63	56.12	55.56	43.88	31.77	77.64	103.08	79.97	46.46	OAY37255.1	hypothetical protein MANES_11G086500 [Manihot esculenta]	GO:0006950(response to stress)	*	GO:0016787(hydrolase activity)	*	*	*	*	*
response to stress	Lus10042317.g	0.58	1.69	5.24	5.92	6	5.01	10.24	8.86	23.01	20.94	35.94	35.43	12.31	15.49	23.49	21.5	XP_002306111.2	hypothetical protein POPTR_0004s16340g [Populus trichocarpa]	GO:0006950(response to stress)	*	GO:0016787(hydrolase activity)	*	*	*	*	*
response to stress	Lus10042418.g	91.82	92.48	55.22	47.94	113.39	141.37	287.2	396.17	238.27	265.74	219.76	192.3	57.52	56.18	139.68	152.8	NP_001306722.1	phospholipid hydroperoxide glutathione peroxidase 1, chloroplastic-like [Populus euphratica]	GO:0006979(response to oxidative stress);GO:0055114(oxidation-reduction process)	*	GO:0004602(glutathione peroxidase activity);GO:0016491(oxidoreductase activity);GO:0004601(peroxidase activity)	K00432|gpx|http://www.genome.jp/dbget-bin/www_bget?ko:K00432	ko00590(Arachidonic acid metabolism);ko00480(Glutathione metabolism)	KOG1651(O)(Glutathione peroxidase)	sp|Q9SZ54|GPX7_ARATH	sp|Q9SZ54|GPX7_ARATH Putative glutathione peroxidase 7, chloroplastic OS=Arabidopsis thaliana GN=GPX7 PE=3 SV=2
response to stress	Lus10042451.g	0.42	0.24	0.52	0.26	0.78	0.96	1	0.81	1.14	1.32	1.09	1.25	1	1.13	1.22	0.91	XP_011036936.1	PREDICTED: ATP-dependent DNA helicase Q-like 1 [Populus euphratica]	GO:0006310(DNA recombination);GO:0000724(double-strand break repair via homologous recombination)	GO:0005737(cytoplasm);GO:0005694(chromosome);GO:0005634(nucleus)	GO:0008026(ATP-dependent helicase activity);GO:0003676(nucleic acid binding);GO:0005524(ATP binding);GO:0004386(helicase activity);GO:0016787(hydrolase activity);GO:0003677(DNA binding);GO:0009378(four-way junction helicase activity);GO:0043140(ATP-dependent 3'-5' DNA helicase activity)	K10901|BLM, RECQL3, SGS1|http://www.genome.jp/dbget-bin/www_bget?ko:K10901	ko03440(Homologous recombination)	KOG0351(L)(ATP-dependent DNA helicase)	sp|Q9FT74|RQL1_ARATH	sp|Q9FT74|RQL1_ARATH ATP-dependent DNA helicase Q-like 1 OS=Arabidopsis thaliana GN=RECQL1 PE=2 SV=1
response to stress	Lus10042459.g	0.02	0.1	0.06	0.05	0.38	0.47	0.57	0.96	0.54	0.57	0.43	0.33	0.8	0.59	0.2	0.34	XP_015870355.1	PREDICTED: protein TOO MANY MOUTHS [Ziziphus jujuba]	GO:0006281(DNA repair);GO:0008356(asymmetric cell division);GO:0009737(response to abscisic acid)	GO:0030915(Smc5-Smc6 complex);GO:0005634(nucleus);GO:0016020(membrane)	*	*	*	KOG2866(S)(Uncharacterized conserved protein)	sp|Q9C689|NSE4A_ARATH;sp|Q9SSD1|TMM_ARATH	sp|Q9C689|NSE4A_ARATH Non-structural maintenance of chromosomes element 4 homolog A OS=Arabidopsis thaliana GN=NSE4A PE=2 SV=1;sp|Q9SSD1|TMM_ARATH Protein TOO MANY MOUTHS OS=Arabidopsis thaliana GN=TMM PE=1 SV=1
response to stress	Lus10042489.g	62.48	82.66	68.53	95.03	160.54	57.54	118.99	56.42	354.53	520.28	452.24	431.47	49.3	79.66	141.39	99.61	XP_011023638.1	PREDICTED: MLP-like protein 43 [Populus euphratica]	GO:0009607(response to biotic stimulus);GO:0006952(defense response)	*	*	*	*	*	sp|P19825|MLP15_PAPSO	sp|P19825|MLP15_PAPSO Major latex protein 15 OS=Papaver somniferum GN=MLP15 PE=2 SV=2
response to stress	Lus10042731.g	6.34	1.43	1.33	1.82	4.78	7.24	210.07	179.77	42.63	61.25	24.8	17.56	7.74	8.06	141.85	101.16	EEF42127.1	NAC domain-containing protein, putative [Ricinus communis]	GO:0006351(transcription, DNA-templated);GO:0006355(regulation of transcription, DNA-templated);GO:0009611(response to wounding);GO:0009788(negative regulation of abscisic acid-activated signaling pathway);GO:0007275(multicellular organism development)	GO:0005634(nucleus)	GO:0003677(DNA binding);GO:0003700(transcription factor activity, sequence-specific DNA binding)	*	*	*	sp|Q39013|NAC2_ARATH	sp|Q39013|NAC2_ARATH NAC domain-containing protein 2 OS=Arabidopsis thaliana GN=NAC002 PE=2 SV=2
response to stress	Lus10042733.g	7.95	7.03	6.15	5.78	8.4	3.59	19.68	15.55	33.01	24.51	21.37	21.98	3.58	3.01	11.1	10.99	AKE49459.1	NBS-LRR disease resistance protein NBS44 [Dimocarpus longan]	GO:0006952(defense response)	*	GO:0043531(ADP binding)	*	*	*	*	*
response to stress	Lus10042891.g	10.06	12.26	11.1	11.94	11.36	12.69	25.03	23.72	38.25	36.67	30.41	34.12	10.15	11.57	26.98	24.9	KYP72071.1	DnaJ protein isogeny [Cajanus cajan]	GO:0009408(response to heat);GO:0006457(protein folding)	*	GO:0005524(ATP binding);GO:0031072(heat shock protein binding);GO:0051082(unfolded protein binding);GO:0046872(metal ion binding)	K09503|DNAJA2|http://www.genome.jp/dbget-bin/www_bget?ko:K09503	ko04141(Protein processing in endoplasmic reticulum)	KOG0712(O)(Molecular chaperone (DnaJ superfamily))	sp|Q04960|DNJH_CUCSA;sp|P42825|DNAJ2_ARATH	sp|Q04960|DNJH_CUCSA DnaJ protein homolog OS=Cucumis sativus GN=DNAJ1 PE=2 SV=1;sp|P42825|DNAJ2_ARATH Chaperone protein dnaJ 2 OS=Arabidopsis thaliana GN=ATJ2 PE=1 SV=2
response to stress	Lus10042967.g	0.19	0.38	0.44	0.44	0.3	1.1	1.3	1.43	1.08	0.97	0.66	1.26	0.73	0.61	1.06	2.1	XP_002511977.1	PREDICTED: DNA mismatch repair protein MSH2 [Ricinus communis]	GO:0006974(cellular response to DNA damage stimulus);GO:0006298(mismatch repair);GO:0006281(DNA repair);GO:0006311(meiotic gene conversion);GO:0007131(reciprocal meiotic recombination);GO:0045128(negative regulation of reciprocal meiotic recombination);GO:0000710(meiotic mismatch repair);GO:0043570(maintenance of DNA repeat elements);GO:0006301(postreplication repair)	GO:0032300(mismatch repair complex);GO:0032301(MutSalpha complex);GO:0032302(MutSbeta complex);GO:0000228(nuclear chromosome)	GO:0003677(DNA binding);GO:0005524(ATP binding);GO:0030983(mismatched DNA binding);GO:0000166(nucleotide binding);GO:0032137(guanine/thymine mispair binding);GO:0000404(heteroduplex DNA loop binding);GO:0000403(Y-form DNA binding);GO:0000400(four-way junction DNA binding);GO:0003684(damaged DNA binding);GO:0000406(double-strand/single-strand DNA junction binding)	K08735|MSH2|http://www.genome.jp/dbget-bin/www_bget?ko:K08735	ko03430(Mismatch repair)	KOG0217(L)(Mismatch repair ATPase MSH6 (MutS family))	sp|O24617|MSH2_ARATH	sp|O24617|MSH2_ARATH DNA mismatch repair protein MSH2 OS=Arabidopsis thaliana GN=MSH2 PE=1 SV=1
response to stress	Lus10043002.g	29.66	31.21	31.26	33.44	70.07	64.96	116.62	110.68	36.07	41.18	55.88	57.09	76.22	56.66	101.83	70.58	NP_001294898.1	peptide methionine sulfoxide reductase A1-like [Jatropha curcas]	GO:0030091(protein repair);GO:0006979(response to oxidative stress);GO:0055114(oxidation-reduction process)	*	GO:0008113(peptide-methionine (S)-S-oxide reductase activity);GO:0016671(oxidoreductase activity, acting on a sulfur group of donors, disulfide as acceptor);GO:0016491(oxidoreductase activity)	K07304|msrA|http://www.genome.jp/dbget-bin/www_bget?ko:K07304	*	KOG1635(O)(Peptide methionine sulfoxide reductase)	sp|Q9SEC2|MSRA_LACSA	sp|Q9SEC2|MSRA_LACSA Peptide methionine sulfoxide reductase OS=Lactuca sativa PE=2 SV=1
response to stress	Lus10043181.g	5.29	6.35	6.74	4.6	17.61	17.67	22.22	24.1	20.23	17.07	15.01	13.04	13.32	11.49	21.76	18.82	OAY28437.1	hypothetical protein MANES_15G066500 [Manihot esculenta]	GO:0042538(hyperosmotic salinity response);GO:0032456(endocytic recycling);GO:0051260(protein homooligomerization);GO:0006897(endocytosis)	GO:0005737(cytoplasm);GO:0010008(endosome membrane);GO:0005886(plasma membrane);GO:0016020(membrane);GO:0005768(endosome);GO:0043231(intracellular membrane-bounded organelle);GO:0009506(plasmodesma)	GO:0005509(calcium ion binding);GO:0005525(GTP binding);GO:0000166(nucleotide binding);GO:0016787(hydrolase activity);GO:0005515(protein binding)	K12483|EHD1|http://www.genome.jp/dbget-bin/www_bget?ko:K12483	ko04144(Endocytosis)	KOG0998(TU)(Synaptic vesicle protein EHS-1 and related EH domain proteins);KOG1954(TU)(Endocytosis/signaling protein EHD1)	sp|Q94CF0|EHD1_ARATH	sp|Q94CF0|EHD1_ARATH EH domain-containing protein 1 OS=Arabidopsis thaliana GN=EHD1 PE=1 SV=1
response to stress	Lus10043186.g	11.08	10.15	20.19	15.88	29.95	39.74	321.21	410.4	128.6	122.23	102.07	111.38	31.53	27.55	288.8	255.98	XP_002321716.2	hypothetical protein POPTR_0015s11180g [Populus trichocarpa]	GO:0006950(response to stress);GO:0009737(response to abscisic acid)	GO:0016020(membrane);GO:0016021(integral component of membrane)	*	K17279|REEP5_6|http://www.genome.jp/dbget-bin/www_bget?ko:K17279	*	KOG1726(V)(HVA22/DP1 gene product-related proteins)	sp|Q9FED2|HA22E_ARATH;sp|Q9S760|HA22D_ARATH	sp|Q9FED2|HA22E_ARATH HVA22-like protein e OS=Arabidopsis thaliana GN=HVA22E PE=2 SV=1;sp|Q9S760|HA22D_ARATH HVA22-like protein d OS=Arabidopsis thaliana GN=HVA22D PE=2 SV=1
response to stress	Lus10043272.g	8.06	7.89	16.37	10.25	72.61	71.9	28.52	48.47	12.84	14.67	13.68	16.93	54.53	27.46	41.16	31.12	OAY31691.1	hypothetical protein MANES_14G132600 [Manihot esculenta]	GO:0016036(cellular response to phosphate starvation)	GO:0005783(endoplasmic reticulum);GO:0005634(nucleus)	*	*	*	KOG1162(U)(Predicted small molecule transporter)	sp|O48781|SPX2_ARATH;sp|Q8LBH4|SPX1_ARATH	sp|O48781|SPX2_ARATH SPX domain-containing protein 2 OS=Arabidopsis thaliana GN=SPX2 PE=2 SV=1;sp|Q8LBH4|SPX1_ARATH SPX domain-containing protein 1 OS=Arabidopsis thaliana GN=SPX1 PE=1 SV=2
response to stress	Lus10043394.g	6.19	8.07	10.65	6.74	13.9	18.67	26.44	24.49	17.23	18.88	21.69	15.37	15.49	16.47	24.91	20.92	XP_007205865.1	hypothetical protein PRUPE_ppa011184mg [Prunus persica]	GO:0006810(transport);GO:0016192(vesicle-mediated transport);GO:0009651(response to salt stress)	GO:0016020(membrane);GO:0016021(integral component of membrane);GO:0005773(vacuole)	*	K08515|VAMP7|http://www.genome.jp/dbget-bin/www_bget?ko:K08515	ko04130(SNARE interactions in vesicular transport)	KOG0860(U)(Synaptobrevin/VAMP-like protein)	sp|Q9FMR5|VA714_ARATH	sp|Q9FMR5|VA714_ARATH Vesicle-associated membrane protein 714 OS=Arabidopsis thaliana GN=VAMP714 PE=1 SV=1
response to stress	scaffold121.34	2.22	2.09	1.76	2.29	1.86	1.83	7.77	6.24	8.87	8	6.17	6.56	1.14	1.37	4.91	4.57	OAY24682.1	hypothetical protein MANES_17G035000 [Manihot esculenta]	GO:0006281(DNA repair)	GO:0005634(nucleus)	GO:0008081(phosphoric diester hydrolase activity)	K10862|TDP1|http://www.genome.jp/dbget-bin/www_bget?ko:K10862	*	KOG2031(L)(Tyrosyl-DNA phosphodiesterase)	sp|Q8H1D9|TYDP1_ARATH	sp|Q8H1D9|TYDP1_ARATH Tyrosyl-DNA phosphodiesterase 1 OS=Arabidopsis thaliana GN=TDP1 PE=1 SV=1
response to stress	scaffold145.100	16.67	13.69	14.68	10.46	15.2	26.66	36.33	29.16	16.45	21.18	27.61	21.51	62.6	121.98	130.77	49.79	AKJ66819.1	glutathione peroxidase [Populus euphratica]	GO:0055114(oxidation-reduction process);GO:0006979(response to oxidative stress)	GO:0016020(membrane);GO:0016021(integral component of membrane)	GO:0004602(glutathione peroxidase activity);GO:0016491(oxidoreductase activity);GO:0004601(peroxidase activity)	K00432|gpx|http://www.genome.jp/dbget-bin/www_bget?ko:K00432	ko00590(Arachidonic acid metabolism);ko00480(Glutathione metabolism)	KOG1651(O)(Glutathione peroxidase)	sp|O04922|GPX2_ARATH	sp|O04922|GPX2_ARATH Probable glutathione peroxidase 2 OS=Arabidopsis thaliana GN=GPX2 PE=1 SV=1
response to stress	scaffold179.1	0	0.04	0	0	0.18	0.04	2.55	0.54	1.64	1.01	1.13	1.02	0	0	2.1	1.19	KDP40505.1	hypothetical protein JCGZ_24504 [Jatropha curcas]	GO:0006952(defense response);GO:0007165(signal transduction)	*	GO:0004721(phosphoprotein phosphatase activity);GO:0043531(ADP binding);GO:0016787(hydrolase activity)	*	*	*	sp|Q9LRR5|DRL21_ARATH	sp|Q9LRR5|DRL21_ARATH Putative disease resistance protein At3g14460 OS=Arabidopsis thaliana GN=At3g14460 PE=3 SV=1
response to stress	scaffold200.18	0.78	0.61	0.38	0.34	1.05	1.46	1.34	1.17	1.33	1.02	1.66	0.84	1.35	2.17	2.55	2.25	OAY53490.1	hypothetical protein MANES_03G000800 [Manihot esculenta]	GO:0006950(response to stress);GO:0006468(protein phosphorylation);GO:0016310(phosphorylation);GO:0055114(oxidation-reduction process)	GO:0005886(plasma membrane)	GO:0004672(protein kinase activity);GO:0005524(ATP binding);GO:0016301(kinase activity);GO:0047134(protein-disulfide reductase activity);GO:0016787(hydrolase activity)	K17609|NXN|http://www.genome.jp/dbget-bin/www_bget?ko:K17609	*	*	sp|Q9FKG6|PUB52_ARATH	sp|Q9FKG6|PUB52_ARATH U-box domain-containing protein 52 OS=Arabidopsis thaliana GN=PUB52 PE=2 SV=1
response to stress	scaffold204.35	0.61	0.38	1.04	0.82	0.67	1.57	1.67	1.11	3.61	1.64	1.48	2.3	0.29	0.95	1.31	2.67	XP_010052841.1	PREDICTED: peroxidase 42 [Eucalyptus grandis]	GO:0042744(hydrogen peroxide catabolic process);GO:0055114(oxidation-reduction process);GO:0009664(plant-type cell wall organization);GO:0006979(response to oxidative stress)	GO:0005576(extracellular region);GO:0009505(plant-type cell wall)	GO:0020037(heme binding);GO:0046872(metal ion binding);GO:0016491(oxidoreductase activity);GO:0004601(peroxidase activity)	K00430|E1.11.1.7|http://www.genome.jp/dbget-bin/www_bget?ko:K00430	ko00940(Phenylpropanoid biosynthesis)	*	sp|Q9SB81|PER42_ARATH	sp|Q9SB81|PER42_ARATH Peroxidase 42 OS=Arabidopsis thaliana GN=PER42 PE=1 SV=2
response to stress	scaffold225.31	1.04	1.52	1	0.9	2.2	2.92	3.47	4.44	6.99	6.79	4.08	3.45	2.92	2.93	4.95	4.83	GAV67943.1	Pkinase domain-containing protein/Stress-antifung domain-containing protein [Cephalotus follicularis]	GO:0006468(protein phosphorylation);GO:0006952(defense response)	GO:0016020(membrane);GO:0016021(integral component of membrane);GO:0005886(plasma membrane);GO:0009506(plasmodesma)	GO:0004672(protein kinase activity);GO:0005524(ATP binding);GO:0004674(protein serine/threonine kinase activity)	*	*	*	sp|Q9FNE1|CRK42_ARATH	sp|Q9FNE1|CRK42_ARATH Cysteine-rich receptor-like protein kinase 42 OS=Arabidopsis thaliana GN=CRK42 PE=2 SV=1
response to stress	scaffold23.41	13.95	24.51	0	0	0	0	18.66	80.49	83.59	36.71	6.43	8.39	0	0	0	0	XP_010052841.1	PREDICTED: peroxidase 42 [Eucalyptus grandis]	GO:0042744(hydrogen peroxide catabolic process);GO:0055114(oxidation-reduction process);GO:0006979(response to oxidative stress);GO:0009664(plant-type cell wall organization)	GO:0005576(extracellular region);GO:0009505(plant-type cell wall)	GO:0020037(heme binding);GO:0046872(metal ion binding);GO:0016491(oxidoreductase activity);GO:0004601(peroxidase activity)	K00430|E1.11.1.7|http://www.genome.jp/dbget-bin/www_bget?ko:K00430	ko00940(Phenylpropanoid biosynthesis)	*	sp|Q9SB81|PER42_ARATH	sp|Q9SB81|PER42_ARATH Peroxidase 42 OS=Arabidopsis thaliana GN=PER42 PE=1 SV=2
response to stress	scaffold34.51	25.3	30.28	50.48	32.7	77.33	79.93	147.09	200.86	129.56	89.31	99.93	104.11	90.36	85.5	179.96	200.36	OAY48362.1	hypothetical protein MANES_06G152800 [Manihot esculenta]	GO:0006950(response to stress);GO:0006457(protein folding)	*	GO:0051082(unfolded protein binding);GO:0005524(ATP binding)	K04079|htpG, HSP90A|http://www.genome.jp/dbget-bin/www_bget?ko:K04079	ko04141(Protein processing in endoplasmic reticulum);ko04626(Plant-pathogen interaction)	KOG0020(O)(Endoplasmic reticulum glucose-regulated protein (GRP94/endoplasmin), HSP90 family)	sp|P36182|HSP82_TOBAC	sp|P36182|HSP82_TOBAC Heat shock protein 82 (Fragment) OS=Nicotiana tabacum GN=HSP82 PE=2 SV=1
response to stress	scaffold353.112	0.17	0.1	0.22	0.1	0.48	0.29	0.94	0.58	0.76	0.76	0.11	0.4	0.19	0.07	0.27	0.19	XP_012091750.1	PREDICTED: putative disease resistance RPP13-like protein 1 [Jatropha curcas]	GO:0006952(defense response)	*	GO:0004721(phosphoprotein phosphatase activity);GO:0043531(ADP binding);GO:0016787(hydrolase activity)	*	*	*	sp|Q9LRR5|DRL21_ARATH	sp|Q9LRR5|DRL21_ARATH Putative disease resistance protein At3g14460 OS=Arabidopsis thaliana GN=At3g14460 PE=3 SV=1
response to stress	scaffold370.2	0.31	0	0	0	6.18	0	7.42	8.32	0	0.47	0	0	0.71	0	9.23	4.44	OAY62063.1	hypothetical protein MANES_01G239000 [Manihot esculenta]	GO:0006351(transcription, DNA-templated);GO:0006355(regulation of transcription, DNA-templated);GO:0045893(positive regulation of transcription, DNA-templated);GO:0042754(negative regulation of circadian rhythm);GO:0045892(negative regulation of transcription, DNA-templated);GO:0043496(regulation of protein homodimerization activity);GO:0007623(circadian rhythm);GO:0009409(response to cold)	GO:0005634(nucleus)	GO:0003677(DNA binding);GO:0043565(sequence-specific DNA binding)	K12133|LHY|http://www.genome.jp/dbget-bin/www_bget?ko:K12133	ko04712(Circadian rhythm - plant)	*	sp|Q6R0H1|LHY_ARATH	sp|Q6R0H1|LHY_ARATH Protein LHY OS=Arabidopsis thaliana GN=LHY PE=1 SV=2
response to stress	scaffold43.41	0.51	0.43	0.6	0.71	0.78	0.76	1.37	4.02	2.01	1.7	2.29	2.31	0.22	0.64	1.93	2.34	XP_016497895.1	PREDICTED: endoplasmin homolog [Nicotiana tabacum]	GO:0006950(response to stress);GO:0006457(protein folding)	*	GO:0005524(ATP binding);GO:0051082(unfolded protein binding)	K09487|HSP90B, TRA1|http://www.genome.jp/dbget-bin/www_bget?ko:K09487	ko04141(Protein processing in endoplasmic reticulum);ko04626(Plant-pathogen interaction)	KOG0020(O)(Endoplasmic reticulum glucose-regulated protein (GRP94/endoplasmin), HSP90 family)	sp|P35016|ENPL_CATRO	sp|P35016|ENPL_CATRO Endoplasmin homolog OS=Catharanthus roseus GN=HSP90 PE=2 SV=1
response to stress	scaffold462.241	0.28	0.14	0	0	0.67	0	17.01	53.79	4.72	3.78	1.01	1.03	0.15	1.32	3.52	1.53	XP_004303818.1	PREDICTED: uncharacterized protein LOC101314483 [Fragaria vesca subsp. vesca]	GO:0009651(response to salt stress)	GO:0005783(endoplasmic reticulum)	*	*	*	*	*	*
response to stress	scaffold701.92	5.86	4.75	8.1	5.9	38.11	74.77	21.37	30.99	7.81	4.3	6.51	3.7	57.4	84.23	42.64	53.13	XP_016692281.1	PREDICTED: uncharacterized protein LOC107909314 [Gossypium hirsutum]	GO:0006950(response to stress)	*	*	*	*	*	sp|Q8VYN9|PHO32_ARATH	sp|Q8VYN9|PHO32_ARATH Universal stress protein PHOS32 OS=Arabidopsis thaliana GN=PHOS32 PE=1 SV=1
response to stress	scaffold732.45	1.5	2.3	1.14	1.17	12	19.8	41.13	61.25	22.74	24.81	10.39	9.54	4.82	5.78	33.06	48.77	XP_012068852.1	PREDICTED: protein TIFY 10A-like [Jatropha curcas]	GO:0031347(regulation of defense response);GO:0009611(response to wounding);GO:2000022(regulation of jasmonic acid mediated signaling pathway);GO:1903507(negative regulation of nucleic acid-templated transcription)	GO:0005634(nucleus)	GO:0003714(transcription corepressor activity)	K13464|JAZ|http://www.genome.jp/dbget-bin/www_bget?ko:K13464	ko04075(Plant hormone signal transduction)	*	sp|A2XD79|TI11C_ORYSI	sp|A2XD79|TI11C_ORYSI Protein TIFY 11c OS=Oryza sativa subsp. indica GN=TIFY11C PE=3 SV=1
response to stress	scaffold863.77	7.19	8.18	10.07	7.64	25.4	47.35	24.38	29.75	12.66	12.17	11.1	11.2	23.41	36.74	20.72	35.03	XP_004293478.1	PREDICTED: frataxin, mitochondrial [Fragaria vesca subsp. vesca]	GO:0016226(iron-sulfur cluster assembly);GO:0055114(oxidation-reduction process);GO:0042542(response to hydrogen peroxide);GO:0006979(response to oxidative stress);GO:0009060(aerobic respiration)	GO:0005739(mitochondrion)	GO:0008199(ferric iron binding);GO:0004322(ferroxidase activity)	K19054|FXN|http://www.genome.jp/dbget-bin/www_bget?ko:K19054	ko00860(Porphyrin and chlorophyll metabolism)	KOG3413(P)(Mitochondrial matrix protein frataxin, involved in Fe/S protein biosynthesis)	sp|Q9ZR07|FRDA_ARATH	sp|Q9ZR07|FRDA_ARATH Frataxin, mitochondrial OS=Arabidopsis thaliana GN=FH PE=1 SV=2
response to water	Lus10000659.g	4.75	3.5	3.98	5.96	0.44	2.69	51.17	41.61	150.16	140.46	144.06	119.84	2.48	1.63	43.67	47.89	XP_007050675.2	PREDICTED: EID1-like F-box protein 3 [Theobroma cacao]	GO:0010228(vegetative to reproductive phase transition of meristem);GO:0009738(abscisic acid-activated signaling pathway);GO:0010029(regulation of seed germination);GO:0009414(response to water deprivation);GO:0006970(response to osmotic stress);GO:0009651(response to salt stress);GO:0009737(response to abscisic acid)	GO:0005634(nucleus)	*	*	*	*	sp|Q93ZT5|EDL3_ARATH	sp|Q93ZT5|EDL3_ARATH EID1-like F-box protein 3 OS=Arabidopsis thaliana GN=EDL3 PE=2 SV=1
response to water	Lus10001876.g	0.2	0.71	0.64	0.32	0.28	0.83	2.99	2.59	2.29	2.48	1.78	2.17	0.75	0.58	2.5	1.44	ACU15464.1	unknown [Glycine max]	GO:0009269(response to desiccation)	*	*	*	*	*	sp|P46519|LEA14_SOYBN	sp|P46519|LEA14_SOYBN Desiccation protectant protein Lea14 homolog OS=Glycine max PE=2 SV=1
response to water	Lus10002899.g	7.46	8.19	8.81	6.61	6.53	8.44	17.85	13.84	14.29	19.69	15.51	16.99	8.83	10.85	22.66	24.22	XP_012076603.1	PREDICTED: transcription initiation factor TFIID subunit 11 [Jatropha curcas]	GO:0010118(stomatal movement);GO:0031347(regulation of defense response);GO:2000022(regulation of jasmonic acid mediated signaling pathway);GO:0009867(jasmonic acid mediated signaling pathway);GO:0009620(response to fungus);GO:0002229(defense response to oomycetes);GO:0009738(abscisic acid-activated signaling pathway);GO:0009787(regulation of abscisic acid-activated signaling pathway);GO:0009682(…	GO:0005634(nucleus)	GO:0003677(DNA binding)	*	*	*	sp|Q8H0V5|OCP3_ARATH	sp|Q8H0V5|OCP3_ARATH Protein OVEREXPRESSOR OF CATIONIC PEROXIDASE 3 OS=Arabidopsis thaliana GN=OCP3 PE=1 SV=1
response to water	Lus10005652.g	17.09	18.51	39.97	13.84	143.58	163.77	6633.25	6881.25	2650.92	2978.5	757.28	1028.97	63.33	44.32	3930.48	1668.29	XP_010416529.1	PREDICTED: dehydrin ERD14-like [Camelina sativa]	GO:0006950(response to stress);GO:0009415(response to water);GO:0009739(response to gibberellin);GO:0009631(cold acclimation);GO:0009269(response to desiccation);GO:0009737(response to abscisic acid);GO:0009409(response to cold);GO:0009414(response to water deprivation)	GO:0005886(plasma membrane);GO:0005829(cytosol);GO:0009507(chloroplast);GO:0005794(Golgi apparatus);GO:0005634(nucleus);GO:0016020(membrane)	GO:0005509(calcium ion binding)	*	*	*	sp|P42763|ERD14_ARATH;sp|P31168|COR47_ARATH;sp|P46524|CO410_WHEAT	sp|P42763|ERD14_ARATH Dehydrin ERD14 OS=Arabidopsis thaliana GN=ERD14 PE=1 SV=1;sp|P31168|COR47_ARATH Dehydrin COR47 OS=Arabidopsis thaliana GN=COR47 PE=1 SV=2;sp|P46524|CO410_WHEAT Dehydrin COR410 OS=Triticum aestivum GN=COR410 PE=2 SV=1
response to water	Lus10006452.g	2.54	2.87	2.24	2.99	5.55	6.04	8.63	8.55	5.51	6.86	5.95	5.28	6.96	8.32	8.95	5.94	XP_015572282.1	PREDICTED: regulator of G-protein signaling 1 isoform X2 [Ricinus communis]	GO:0007186(G-protein coupled receptor signaling pathway);GO:0009737(response to abscisic acid);GO:0010182(sugar mediated signaling pathway);GO:0009749(response to glucose);GO:0042127(regulation of cell proliferation);GO:0043547(positive regulation of GTPase activity);GO:0009414(response to water deprivation)	GO:0005737(cytoplasm);GO:0010008(endosome membrane);GO:0005886(plasma membrane);GO:0016020(membrane);GO:0016021(integral component of membrane);GO:0005634(nucleus)	GO:0005096(GTPase activator activity);GO:0004930(G-protein coupled receptor activity)	*	*	*	sp|Q8H1F2|RGS1_ARATH	sp|Q8H1F2|RGS1_ARATH Regulator of G-protein signaling 1 OS=Arabidopsis thaliana GN=RGS1 PE=1 SV=1
response to water	Lus10007905.g	10.76	12.4	19.76	22.84	4.27	6.2	68.45	36.84	23.88	26.75	43.78	54.66	75.5	43.78	247.08	77.22	XP_014625734.1	PREDICTED: desiccation protectant protein Lea14 homolog isoform X1 [Glycine max]	GO:0009269(response to desiccation)	*	*	*	*	*	sp|P46519|LEA14_SOYBN	sp|P46519|LEA14_SOYBN Desiccation protectant protein Lea14 homolog OS=Glycine max PE=2 SV=1
response to water	Lus10008227.g	181.76	161.16	247.2	268.2	333.22	264.62	898.11	872.47	767.23	914.16	865.66	847.94	307.95	277.28	771.26	713.84	EOY16019.1	Annexin 1 [Theobroma cacao]	GO:0070588(calcium ion transmembrane transport);GO:0006970(response to osmotic stress);GO:0055114(oxidation-reduction process);GO:0009737(response to abscisic acid);GO:0071435(potassium ion export);GO:0009409(response to cold);GO:0009408(response to heat);GO:0046686(response to cadmium ion);GO:0009414(response to water deprivation);GO:0009651(response to salt stress);GO:0006979(response to oxidat…	GO:0005739(mitochondrion);GO:0005886(plasma membrane);GO:0005829(cytosol);GO:0009579(thylakoid);GO:0016020(membrane);GO:0009507(chloroplast);GO:0005773(vacuole);GO:0005618(cell wall);GO:0009570(chloroplast stroma);GO:0009506(plasmodesma);GO:0005737(cytoplasm);GO:0048046(apoplast);GO:0005634(nucleus);GO:0005774(vacuolar membrane)	GO:0005509(calcium ion binding);GO:0005544(calcium-dependent phospholipid binding);GO:0005524(ATP binding);GO:0005507(copper ion binding);GO:0042803(protein homodimerization activity);GO:0004601(peroxidase activity);GO:0008270(zinc ion binding)	K17095|ANXA7_11|http://www.genome.jp/dbget-bin/www_bget?ko:K17095	*	KOG0819(U)(Annexin)	sp|Q9SYT0|ANXD1_ARATH	sp|Q9SYT0|ANXD1_ARATH Annexin D1 OS=Arabidopsis thaliana GN=ANN1 PE=1 SV=1
response to water	Lus10010140.g	23.48	38.74	24.59	20.01	39.49	6.78	133.92	142.47	109.94	105.14	91.01	106.92	28.95	7.26	132.97	151.6	ACU15464.1	unknown [Glycine max]	GO:0009269(response to desiccation)	*	*	*	*	*	sp|P46519|LEA14_SOYBN	sp|P46519|LEA14_SOYBN Desiccation protectant protein Lea14 homolog OS=Glycine max PE=2 SV=1
response to water	Lus10011777.g	173.84	193.16	170.77	196.26	700.58	936.09	503.42	733.29	89.48	72.75	80.25	72.68	709.32	584.3	732.17	770.1	XP_006298647.1	hypothetical protein CARUB_v10014736mg, partial [Capsella rubella]	GO:0071484(cellular response to light intensity);GO:0009773(photosynthetic electron transport in photosystem I);GO:0055114(oxidation-reduction process);GO:0010117(photoprotection);GO:0009414(response to water deprivation);GO:0009644(response to high light intensity)	GO:0009534(chloroplast thylakoid);GO:0009579(thylakoid);GO:0016020(membrane);GO:0009536(plastid);GO:0009535(chloroplast thylakoid membrane);GO:0009507(chloroplast)	GO:0009055(electron carrier activity);GO:0005515(protein binding)	*	*	*	sp|Q9SL05|PGR5_ARATH	sp|Q9SL05|PGR5_ARATH Protein PROTON GRADIENT REGULATION 5, chloroplastic OS=Arabidopsis thaliana GN=PGR5 PE=1 SV=1
response to water	Lus10013155.g	32.39	31.19	37.94	36.86	109.73	136.69	835.32	1088.55	351.2	412.68	244.42	267.17	123.97	138.67	868.16	936.2	XP_011035738.1	PREDICTED: aldehyde dehydrogenase family 7 member B4 isoform X1 [Populus euphratica]	GO:0008152(metabolic process);GO:0055114(oxidation-reduction process);GO:0009737(response to abscisic acid);GO:0006081(cellular aldehyde metabolic process);GO:0009651(response to salt stress);GO:0009269(response to desiccation)	GO:0005829(cytosol);GO:0005737(cytoplasm)	GO:0016620(oxidoreductase activity, acting on the aldehyde or oxo group of donors, NAD or NADP as acceptor);GO:0016491(oxidoreductase activity);GO:0004029(aldehyde dehydrogenase (NAD) activity);GO:0004028(3-chloroallyl aldehyde dehydrogenase activity)	K14085|ALDH7A1|http://www.genome.jp/dbget-bin/www_bget?ko:K14085	ko00330(Arginine and proline metabolism);ko00260(Glycine, serine and threonine metabolism);ko00340(Histidine metabolism);ko00300(Lysine biosynthesis);ko00310(Lysine degradation);ko00380(Tryptophan metabolism);ko00280(Valine, leucine and isoleucine degradation);ko00053(Ascorbate and aldarate metabolism);ko00010(Glycolysis / Gluconeogenesis);ko00620(Pyruvate metabolism);ko00071(Fatty acid degradati…	KOG2451(C)(Aldehyde dehydrogenase);KOG2450(C)(Aldehyde dehydrogenase);KOG2449(EG)(Methylmalonate semialdehyde dehydrogenase)	sp|Q9SYG7|AL7B4_ARATH;sp|Q9ZPB7|AL7A1_MALDO;sp|P25795|AL7A1_PEA;sp|Q41247|AL7A1_BRANA	sp|Q9SYG7|AL7B4_ARATH Aldehyde dehydrogenase family 7 member B4 OS=Arabidopsis thaliana GN=ALDH7B4 PE=2 SV=3;sp|Q9ZPB7|AL7A1_MALDO Aldehyde dehydrogenase family 7 member A1 OS=Malus domestica PE=1 SV=3;sp|P25795|AL7A1_PEA Aldehyde dehydrogenase family 7 member A1 OS=Pisum sativum PE=1 SV=3;sp|Q41247|AL7A1_BRANA Aldehyde dehydrogenase family 7 member A1 OS=Brassica napus GN=BTG-26 PE=1 SV=3
response to water	Lus10014280.g	0	0.42	0.52	0.58	0	0.41	159.76	60.55	193.3	200.1	72.9	99.46	0	0.23	57.24	18.11	XP_002521515.1	PREDICTED: dehydrin Xero 1 [Ricinus communis]	GO:0006950(response to stress);GO:0009415(response to water)	*	*	*	*	*	sp|P25863|XERO1_ARATH;sp|P12950|DHN1_MAIZE	sp|P25863|XERO1_ARATH Dehydrin Xero 1 OS=Arabidopsis thaliana GN=XERO1 PE=2 SV=2;sp|P12950|DHN1_MAIZE Dehydrin DHN1 OS=Zea mays GN=DHN1 PE=1 SV=2
response to water	Lus10016273.g	31.48	29.09	44.31	48.54	24.82	28.4	292.87	186.99	413.16	539.54	445.22	670.99	25.86	16.6	160.97	157.28	AFN53709.1	hypothetical protein [Linum usitatissimum]	GO:0009790(embryo development);GO:0006970(response to osmotic stress);GO:0009409(response to cold);GO:0048316(seed development);GO:0009414(response to water deprivation)	GO:0005829(cytosol)	*	*	*	*	sp|Q01417|PM1_SOYBN	sp|Q01417|PM1_SOYBN 18 kDa seed maturation protein OS=Glycine max GN=GMPM1 PE=2 SV=1
response to water	Lus10016354.g	7.96	9.28	7.82	9.8	10.89	10.8	24.28	33.73	26.82	25.82	28.38	27.11	8.23	13.1	28.23	26.93	XP_002513092.1	PREDICTED: xanthoxin dehydrogenase [Ricinus communis]	GO:0055114(oxidation-reduction process);GO:0009408(response to heat);GO:0009750(response to fructose);GO:0009688(abscisic acid biosynthetic process);GO:0010115(regulation of abscisic acid biosynthetic process);GO:0006561(proline biosynthetic process);GO:0009414(response to water deprivation)	GO:0005829(cytosol)	GO:0004316(3-oxoacyl-[acyl-carrier-protein] reductase (NADPH) activity);GO:0016491(oxidoreductase activity);GO:0004022(alcohol dehydrogenase (NAD) activity);GO:0010301(xanthoxin dehydrogenase activity)	K09841|ABA2|http://www.genome.jp/dbget-bin/www_bget?ko:K09841	ko00906(Carotenoid biosynthesis)	KOG0725(R)(Reductases with broad range of substrate specificities)	sp|Q9C826|ABA2_ARATH	sp|Q9C826|ABA2_ARATH Xanthoxin dehydrogenase OS=Arabidopsis thaliana GN=ABA2 PE=1 SV=1
response to water	Lus10017977.g	0.25	0.14	0	0.34	1.24	2.96	26.89	18.88	2.85	4.42	1.76	1.7	2.45	0.46	22.98	7	XP_016539780.1	PREDICTED: late embryogenesis abundant protein [Capsicum annuum]	GO:0006950(response to stress);GO:0009737(response to abscisic acid);GO:0009631(cold acclimation);GO:0009415(response to water);GO:0009414(response to water deprivation)	GO:0005829(cytosol)	*	*	*	*	sp|Q96261|DHLEA_ARATH	sp|Q96261|DHLEA_ARATH Probable dehydrin LEA OS=Arabidopsis thaliana GN=LEA PE=2 SV=1
response to water	Lus10019367.g	1.4	2.98	4.34	7.7	5.22	9.22	11.77	25.82	17.24	16	24.54	12.8	10.49	8.03	18.58	15.6	XP_004138972.1	PREDICTED: uncharacterized protein LOC101217348 [Cucumis sativus]	GO:0009269(response to desiccation);GO:0009735(response to cytokinin)	GO:0005886(plasma membrane);GO:0005829(cytosol);GO:0016020(membrane);GO:0009506(plasmodesma);GO:0005794(Golgi apparatus)	*	*	*	*	*	*
response to water	Lus10021240.g	4.32	2.73	12.63	2.69	37.08	49.38	948.26	1561.24	166.25	183.87	39.81	47.92	21.59	25.22	467.84	187.82	XP_018470684.1	PREDICTED: dehydrin ERD14-like [Raphanus sativus]	GO:0006950(response to stress);GO:0009415(response to water)	*	*	*	*	*	sp|P42763|ERD14_ARATH;sp|P42759|ERD10_ARATH	sp|P42763|ERD14_ARATH Dehydrin ERD14 OS=Arabidopsis thaliana GN=ERD14 PE=1 SV=1;sp|P42759|ERD10_ARATH Dehydrin ERD10 OS=Arabidopsis thaliana GN=ERD10 PE=1 SV=1
response to water	Lus10021827.g	34.96	43.05	75.32	46.94	65.89	87.69	234.25	276.18	120.86	123.29	93.63	103.42	70.43	62.77	217.72	145.7	ACB41781.1	dehydrin [Rhododendron catawbiense]	GO:0006950(response to stress);GO:0009415(response to water);GO:0009737(response to abscisic acid);GO:0009631(cold acclimation);GO:0009414(response to water deprivation);GO:0009739(response to gibberellin);GO:0009269(response to desiccation);GO:0009409(response to cold)	GO:0005829(cytosol);GO:0016020(membrane);GO:0005886(plasma membrane);GO:0009507(chloroplast);GO:0005794(Golgi apparatus);GO:0005634(nucleus)	GO:0005509(calcium ion binding)	*	*	*	sp|P42763|ERD14_ARATH	sp|P42763|ERD14_ARATH Dehydrin ERD14 OS=Arabidopsis thaliana GN=ERD14 PE=1 SV=1
response to water	Lus10024614.g	3.96	3.89	3.55	3.85	12.09	7.51	84.18	45.84	5.21	7.44	9.05	7.21	13.63	8.03	82.69	44.73	XP_002303512.2	nitrate transporter family protein [Populus trichocarpa]	GO:0006810(transport);GO:0010167(response to nitrate);GO:0015706(nitrate transport);GO:0006857(oligopeptide transport);GO:0009414(response to water deprivation)	GO:0005886(plasma membrane);GO:0016020(membrane);GO:0016021(integral component of membrane)	GO:0005215(transporter activity);GO:0015112(nitrate transmembrane transporter activity)	K14638|SLC15A3_4, PHT|http://www.genome.jp/dbget-bin/www_bget?ko:K14638	*	*	sp|Q05085|PTR7_ARATH;sp|Q9LVE0|PTR33_ARATH	sp|Q05085|PTR7_ARATH Protein NRT1/ PTR FAMILY 6.3 OS=Arabidopsis thaliana GN=NPF6.3 PE=1 SV=1;sp|Q9LVE0|PTR33_ARATH Protein NRT1/ PTR FAMILY 6.4 OS=Arabidopsis thaliana GN=NPF6.4 PE=1 SV=1
response to water	Lus10025983.g	0.77	0.27	0	0.45	0	0	9.4	1.24	7.75	8.4	5.57	11.08	0	0	1.67	0.26	XP_017252838.1	PREDICTED: dehydrin DHN1 [Daucus carota subsp. sativus]	GO:0006950(response to stress);GO:0009415(response to water)	*	*	*	*	*	sp|P25863|XERO1_ARATH	sp|P25863|XERO1_ARATH Dehydrin Xero 1 OS=Arabidopsis thaliana GN=XERO1 PE=2 SV=2
response to water	Lus10028001.g	3.45	2.49	4.93	8.05	0.67	1.94	108.64	38.32	74.58	112.56	58.31	41.15	1.98	0.78	46.63	54.04	XP_002276328.2	PREDICTED: EID1-like F-box protein 3 [Vitis vinifera]	GO:0010228(vegetative to reproductive phase transition of meristem);GO:0009738(abscisic acid-activated signaling pathway);GO:0010029(regulation of seed germination);GO:0009414(response to water deprivation);GO:0006970(response to osmotic stress);GO:0009651(response to salt stress);GO:0009737(response to abscisic acid)	GO:0005634(nucleus)	*	*	*	*	sp|Q93ZT5|EDL3_ARATH	sp|Q93ZT5|EDL3_ARATH EID1-like F-box protein 3 OS=Arabidopsis thaliana GN=EDL3 PE=2 SV=1
response to water	Lus10029852.g	1.25	1.62	4.95	2.04	4.94	3.44	7.34	5.47	6	5.38	4.58	4.29	11.33	6.04	6.97	8.53	XP_011023753.1	PREDICTED: uncharacterized protein LOC105125143 [Populus euphratica]	GO:0006950(response to stress);GO:0080142(regulation of salicylic acid biosynthetic process);GO:0009697(salicylic acid biosynthetic process);GO:0002229(defense response to oomycetes);GO:0009617(response to bacterium);GO:0071219(cellular response to molecule of bacterial origin);GO:0009789(positive regulation of abscisic acid-activated signaling pathway);GO:0009816(defense response to bacterium, i…	GO:0005634(nucleus)	GO:0005516(calmodulin binding);GO:0043565(sequence-specific DNA binding);GO:0003700(transcription factor activity, sequence-specific DNA binding);GO:0003677(DNA binding)	K09419|HSFF|http://www.genome.jp/dbget-bin/www_bget?ko:K09419	*	*	sp|Q0WVV6|CB60D_ARATH;sp|Q9C635|HSFB4_ARATH;sp|Q9FKL6|CB60B_ARATH	sp|Q0WVV6|CB60D_ARATH Calmodulin-binding protein 60 D OS=Arabidopsis thaliana GN=CBP60D PE=2 SV=1;sp|Q9C635|HSFB4_ARATH Heat stress transcription factor B-4 OS=Arabidopsis thaliana GN=HSFB4 PE=2 SV=1;sp|Q9FKL6|CB60B_ARATH Calmodulin-binding protein 60 B OS=Arabidopsis thaliana GN=CBP60B PE=2 SV=1
response to water	Lus10030805.g	6.65	5.16	21.51	17.95	263.31	126.68	28.65	16.29	9.23	7.92	16.79	8.33	432.76	202.52	33.49	24.65	XP_004300630.1	PREDICTED: glutathione S-transferase U17-like [Fragaria vesca subsp. vesca]	GO:0009407(toxin catabolic process);GO:0006749(glutathione metabolic process);GO:0048527(lateral root development);GO:0080167(response to karrikin);GO:0080148(negative regulation of response to water deprivation);GO:0009636(response to toxic substance);GO:0040008(regulation of growth);GO:0060416(response to growth hormone);GO:0009651(response to salt stress);GO:0009704(de-etiolation)	GO:0005737(cytoplasm);GO:0005829(cytosol);GO:0009507(chloroplast)	GO:0004364(glutathione transferase activity);GO:0016740(transferase activity)	K00799|GST, gst|http://www.genome.jp/dbget-bin/www_bget?ko:K00799	ko00480(Glutathione metabolism)	*	sp|Q9FUS8|GSTUH_ARATH	sp|Q9FUS8|GSTUH_ARATH Glutathione S-transferase U17 OS=Arabidopsis thaliana GN=GSTU17 PE=2 SV=1
response to water	Lus10032252.g	2.67	2.18	1.58	2.09	11.29	7.41	36.74	15.47	3.33	3.07	3.93	2.98	13.68	5.99	25.33	17.11	XP_002303512.2	nitrate transporter family protein [Populus trichocarpa]	GO:0006810(transport);GO:0010167(response to nitrate);GO:0015706(nitrate transport);GO:0006857(oligopeptide transport);GO:0009414(response to water deprivation)	GO:0005886(plasma membrane);GO:0016020(membrane);GO:0016021(integral component of membrane)	GO:0005215(transporter activity);GO:0015112(nitrate transmembrane transporter activity)	K14638|SLC15A3_4, PHT|http://www.genome.jp/dbget-bin/www_bget?ko:K14638	*	*	sp|Q05085|PTR7_ARATH	sp|Q05085|PTR7_ARATH Protein NRT1/ PTR FAMILY 6.3 OS=Arabidopsis thaliana GN=NPF6.3 PE=1 SV=1
response to water	Lus10034568.g	33.45	43.47	54.29	53.93	46.21	66.72	162.4	183.34	125.95	114.79	88.9	97.31	45.96	41.12	153.66	81.05	ACB41781.1	dehydrin [Rhododendron catawbiense]	GO:0006950(response to stress);GO:0009415(response to water);GO:0009737(response to abscisic acid);GO:0009631(cold acclimation);GO:0009414(response to water deprivation)	GO:0005829(cytosol);GO:0016020(membrane)	*	*	*	*	sp|Q9XJ56|ECP44_DAUCA;sp|P42763|ERD14_ARATH	sp|Q9XJ56|ECP44_DAUCA Phosphoprotein ECPP44 OS=Daucus carota GN=ECPP44 PE=1 SV=1;sp|P42763|ERD14_ARATH Dehydrin ERD14 OS=Arabidopsis thaliana GN=ERD14 PE=1 SV=1
response to water	Lus10036319.g	0.28	0.63	0.11	0.82	0.91	0.34	1.83	1.03	1.96	1.84	1.04	1.47	0.94	0.43	1.59	1.12	XP_010429919.1	PREDICTED: DNA damage-binding protein CMR1-like [Camelina sativa]	GO:0006974(cellular response to DNA damage stimulus);GO:0009737(response to abscisic acid);GO:0009414(response to water deprivation)	*	*	*	*	KOG4328(S)(WD40 protein)	sp|Q7S1H9|CMR1_NEUCR	sp|Q7S1H9|CMR1_NEUCR DNA damage-binding protein cmr1 OS=Neurospora crassa (strain ATCC 24698 / 74-OR23-1A / CBS 708.71 / DSM 1257 / FGSC 987) GN=NCU09302 PE=3 SV=1
response to water	Lus10036402.g	85.15	103.59	105.03	113.36	105.85	100.68	638.73	825.54	429.55	333.69	273	312.73	228.43	85.98	488.67	398.63	XP_002511927.1	PREDICTED: desiccation protectant protein Lea14 homolog [Ricinus communis]	GO:0009269(response to desiccation)	*	*	*	*	*	sp|P46519|LEA14_SOYBN	sp|P46519|LEA14_SOYBN Desiccation protectant protein Lea14 homolog OS=Glycine max PE=2 SV=1
response to water	Lus10037702.g	52.4	49.51	67.9	56.59	99.86	140.15	161.65	154.27	78.54	90.99	75.79	64.99	146.36	136.64	176.55	163.51	XP_003546877.1	PREDICTED: zinc finger A20 and AN1 domain-containing stress-associated protein 5 [Glycine max]	GO:0051865(protein autoubiquitination);GO:0016567(protein ubiquitination);GO:0006970(response to osmotic stress);GO:0009414(response to water deprivation)	GO:0005634(nucleus)	GO:0003677(DNA binding);GO:0008270(zinc ion binding);GO:0046872(metal ion binding);GO:0004842(ubiquitin-protein transferase activity)	*	*	KOG3173(R)(Predicted Zn-finger protein)	sp|Q9LHJ8|SAP5_ARATH	sp|Q9LHJ8|SAP5_ARATH Zinc finger A20 and AN1 domain-containing stress-associated protein 5 OS=Arabidopsis thaliana GN=SAP5 PE=2 SV=1
response to water	Lus10041969.g	0.37	0.13	0.14	0	0.31	0.15	3.38	5.06	1.65	0.93	0.54	0.36	0.43	0	1.9	1.22	XP_009765052.1	PREDICTED: late embryogenesis abundant protein [Nicotiana sylvestris]	GO:0006950(response to stress);GO:0009415(response to water);GO:0009737(response to abscisic acid);GO:0009631(cold acclimation);GO:0009414(response to water deprivation)	GO:0005829(cytosol)	*	*	*	*	sp|Q96261|DHLEA_ARATH	sp|Q96261|DHLEA_ARATH Probable dehydrin LEA OS=Arabidopsis thaliana GN=LEA PE=2 SV=1
