# Supplementary material for: Transcriptome analysis and molecular mechanism of linseed (Linum usitatissimum L.) drought tolerance under repeated drought using single-molecule long-read sequencing
Source: BMC Genomics. 2021 Feb 9;22:109. doi: 10.1186/s12864-021-07416-5 (PMC7871411; doi:10.1186/s12864-021-07416-5)
Supplement: Supplementary file 20 — Additional file 20: Table S16. List of possible candidate genes selected for drought tolerance in linseed [file 12864_2021_7416_MOESM20_ESM.xlsx]

## Sheet: Sheet1
				Z141				ny-17
			FPKM vaule				FPKM vaule
No.	Gene ID	Description	NE	DS	RW	RD	NE	DS	RW	RD
1	Lus10001016.g	pyrroline-5-carboxylate synthetase	11.95	71.645	20.91	212.365	16.015	44.955	19.18	141.905
2	Lus10001018.g	pyrroline-5-carboxylate synthetase	9.21	55.94	15.455	173.15	9.88	36.345	13.35	135.815
3	Lus10001019.g	pyrroline-5-carboxylate synthetase	7.62	38.695	10.835	144.555	7.345	23.14	5.75	102.325
4	Lus10004696.g	pyrroline-5-carboxylate synthetase	59.76	678.26	31.725	1327.84	38.675	605.75	13.755	455.23
5	Lus10004697.g	pyrroline-5-carboxylate synthetase	77.975	1776.71	50.18	2746.64	98.69	1434.87	47.98	2340.51
6	Lus10030158.g	pyrroline-5-carboxylate synthetase	15.925	90.585	20.285	200.15	17.675	35.605	19.715	79.965
7	Lus10040262.g	pyrroline-5-carboxylate synthetase	8.375	46.25	3.39	147.97	2.795	58.38	1.365	47.65
8	Lus10040263.g	pyrroline-5-carboxylate synthetase	20.76	147.14	12.19	419.655	12.325	167.94	2.76	140.35
9	Lus10019103.g	Pyrroline-5-carboxylate reductase	23.665	77.575	57.325	112.235	21.135	70.115	38.115	76.38
10	Lus10034453.g	Pyrroline-5-carboxylate reductase	21.155	83.34	21.315	80.69	19.555	69.39	20.075	50.965
11	Lus10034734.g	DNA mismatch repair protein MLH1 (MLH1)	2.115	19.535	1.915	10.355	1.045	10.395	2.1	8.235
12	Lus10033274.g	DNA mismatch repair protein MLH1 (MLH1)	1.535	6.69	3.09	6.545	1.46	4.91	2.585	5.115
13	Lus10015818.g	DNA mismatch repair protein MLH1 (MLH1)	209.36	931.695	436.335	1159.39	205.57	806.195	327.55	631.14
14	Lus10014462 (primary)	DNA mismatch repair protein MLH1 (MLH1)	34.595	1397.11	317.505	5433.52	24.99	315.905	140.115	877.68
15	Lus10005743.g	DNA mismatch repair protein MSH3 (MSH3)	59.44	281.81	234.605	397.19	81.285	322.14	159.875	255.785
16	Lus10017724.g	DNA mismatch repair protein MSH6 (MSH6)	2.245	7.525	4.635	12.22	2.015	5.93	3.955	6.095
17	Lus10032469.g	DNA mismatch repair protein MSH2 (MSH2	7.49	28.76	5.995	17.615	5.965	21.675	3.295	11.045
18	Lus10004055.g	DNA repair protein XP-C	2.155	8.435	1.845	7.005	2.025	6.365	1.255	4.74
19	Lus10003340.g	Dehydrin	0.98	26.595	2.11	13.435	0.555	11.08	1.185	1.45
20	Lus10034568.g	Dehydrin	18.195	61.16	57.5	93.725	17.75	54.635	56.075	79.22
21	Lus10005652.g	Dehydrin	17.8	2814.71	153.675	6757.25	26.905	893.125	53.825	2799.39
22	Lus10034568.g	Dehydrin	38.46	120.37	56.465	172.87	54.11	93.105	43.54	117.355
23	Lus10021240.g	Dehydrin	3.525	175.06	43.23	1254.75	7.66	43.865	23.405	327.83
24	Lus10017977.g	Dehydrin	0.195	3.635	2.1	22.885	0.17	1.73	1.455	14.99
